# Supplementary material for: Identification of key genes, pathways and potential therapeutic agents for liver fibrosis using an integrated bioinformatics analysis
Source: PeerJ. 2019 Mar 22;7:e6645. doi: 10.7717/peerj.6645 (PMC6432904; doi:10.7717/peerj.6645)
Supplement: Data S3 [file peerj-07-6645-s003.xlsx]

## Sheet: GSE6764
Category	Term	Count	%	PValue	Genes	List Total	Pop Hits	Pop Total	Fold Enrichment	Bonferroni	Benjamini	FDR
GOTERM_CC_DIRECT	GO:0070062~extracellular exosome	356	23.7333	9.46263e-26	S100A4, SCPEP1, LDHB, GDA, S100A6, ADCY1, A2M, RARRES1, LTBP2, MASP2, FSTL1, CD53, IGHM, AQP1, UXS1, C1QC, BBOX1, CD48, CD47, CD44, VPS13C, H2AFY, VNN1, RAB25, FAS, CFD, IGLL5, MUC13, F11, F11R, BSG, CAPNS1, TNIK, CRYAB, PIK3IP1, THY1, PRELP, C1QA, C1QB, KRT19, CD37, KRT18, GGACT, TACSTD2, IGHD, F3, ABAT, LAMC1, HLA-DRA, RBP5, ALDOA, ACADSB, HLA-DRB1, ENPP3, MME, PPT1, ACAT1, CD74, GPD1L, LGALS3B…	1375	2811	18224	1.67853	5.33692e-23	5.33692e-23	1.38572e-22
GOTERM_BP_DIRECT	GO:0030198~extracellular matrix organization	59	3.93333	4.43944e-20	MPZL3, PDGFA, NPNT, CD47, CD44, FOXF1, TGFBI, LOX, LOXL1, RECK, F11R, BSG, ICAM2, ICAM3, SPINT1, BGN, LAMC3, COL1A2, VCAN, COL1A1, LAMC1, JAM2, JAM3, ADAMTSL2, LUM, COL3A1, ITGB2, CDH1, DCN, SOX9, ABI3BP, ITGAM, SMOC2, CRISPLD2, ITGB8, COL27A1, ITGAV, COL6A3, COL6A2, LAMB1, COL8A1, SPP1, COL4A4, COL4A3, COL4A2, COL4A1, FBN1, CCDC80, ITGA2, ITGA4, SPARC, COL5A2, COL5A1, LAMA2, VWF, COL14A1, ITGA6,…	1286	196	16792	3.93059	1.97644e-16	1.97644e-16	8.34525e-17
GOTERM_BP_DIRECT	GO:0060337~type I interferon signaling pathway	33	2.2	2.03045e-19	IFITM1, OAS3, RSAD2, OAS1, OAS2, IFI35, ISG20, ISG15, XAF1, MX1, MX2, SP100, BST2, HLA-A, SAMHD1, HLA-C, HLA-B, STAT1, HLA-E, PSMB8, HLA-G, IFNAR1, HLA-F, STAT2, IRF9, IFIT3, IFIT2, IFI27, OASL, IFIT1, IRF7, GBP2, IFI6	1286	64	16792	6.7328	9.03955e-16	4.51978e-16	3.81683e-16
GOTERM_BP_DIRECT	GO:0006955~immune response	88	5.86667	4.17257e-18	IGLV1-44, CD8A, IGKV1-17, IL18, SUSD2, HLA-DMB, CXCL11, HLA-DMA, C1QC, CXCL10, IL1RAP, SEMA3C, FAS, LTB, PTGER4, GZMA, PRG4, HLA-A, HLA-C, CHST4, HLA-B, CTSS, GEM, TRBC1, HLA-E, HLA-DQA1, HLA-F, C8A, TNFRSF10A, SERPINB9, C8B, CCR7, CD86, TNFSF13B, CCR5, IGHD, CCR2, CTSC, HLA-DPA1, SEMA4D, GBP2, HLA-DRA, LCP2, HLA-DQB1, CXCL1, C7, GPR183, TNFRSF21, HLA-DRB1, ENPP1, ENPP2, ENPP3, CXCL2, CXCL9, OAS3…	1286	421	16792	2.72937	1.85763e-14	6.1921e-15	7.8436e-15
GOTERM_CC_DIRECT	GO:0005615~extracellular space	182	12.1333	3.97884e-15	S100A4, CTHRC1, LTBP2, PDGFA, IL18, MMP7, FSTL1, CXCL11, IGHM, MMP2, C1QC, TGFB1, CXCL10, TGFB2, PTGIS, SERPINE2, CTGF, PPP1R1A, FAP, TGFBI, CCBE1, MS4A1, CPA3, LOX, PDGFD, CFD, LGI1, MUC13, SPON1, F11, CST3, CECR1, FGF21, PRELP, VEGFC, THBD, CPE, TACSTD2, F3, TFPI, COL1A2, KDSR, COL1A1, LAMC1, CSTA, TNFAIP2, SMARCA4, ALDOA, C3P1, ENPP1, ENPP2, OAS3, PPT1, IL32, TIMP2, CCL5, ABI3BP, ITGAM, TIMP1,…	1375	1347	18224	1.79079	2.2542e-12	1.1271e-12	5.85088e-12
GOTERM_BP_DIRECT	GO:0051607~defense response to virus	47	3.13333	4.87104e-15	CD8A, IFITM1, ZC3HAV1, F2RL1, CXCL9, OAS3, RSAD2, IFI44L, OAS1, APOBEC3G, OAS2, APOBEC3F, APOBEC3C, ISG20, CXCL10, APOBEC3B, TRIM5, NLRC5, TMEM173, ISG15, BCL2, DDX60, PYCARD, ITCH, MX1, MX2, PTPRC, BST2, HERC5, SAMHD1, IFI16, STAT1, TRIM22, IFNAR1, STAT2, IRF9, IFIT3, IFIT2, ABCC9, IFIT1, OASL, CD86, SLFN11, EIF2AK2, GBP3, GPAM, GBP1	1286	165	16792	3.71942	2.17479e-11	5.43698e-12	9.18154e-12
GOTERM_BP_DIRECT	GO:0060333~interferon-gamma-mediated signaling pathway	30	2	9.23137e-15	HLA-DQB1, HLA-DRB1, OAS3, IFI30, OAS1, OAS2, TRIM5, CD44, HLA-DPB1, SP100, HLA-A, HLA-C, HLA-B, MID1, STAT1, HLA-E, TRIM22, HLA-G, TRIM21, HLA-DQA1, HLA-F, IRF9, TRIM38, OASL, TRIM31, IRF7, HLA-DPA1, GBP2, GBP1, HLA-DRA	1286	71	16792	5.51727	4.10245e-11	8.20488e-12	1.73195e-11
GOTERM_CC_DIRECT	GO:0009986~cell surface	94	6.26667	3.98903e-14	MICB, PDIA3, CLSTN2, PDGFA, FERMT2, CLSTN1, MMP7, IQGAP2, CD53, LY9, IGHM, HLA-DMA, TGFB1, EPCAM, SLC1A2, SRPX, CD44, CXCR4, ROBO1, ANK3, FAP, FAS, RAMP1, CEACAM1, GHR, CLMP, BST2, CRYAB, HLA-A, HLA-C, ACKR3, CFTR, HLA-B, HLA-E, SLIT2, HLA-F, TNFRSF10A, CD86, CCR7, FOLH1, TNS1, BGN, THBD, CCR5, F3, BACE2, TFPI, VAMP5, SORT1, HLA-DPA1, VAMP1, HLA-DRA, FGFR2, HLA-DRB1, ENPP1, PLVAP, ITGB2, GPRC5B, …	1375	542	18224	2.29863	2.24794e-11	7.49312e-12	5.83644e-11
KEGG_PATHWAY	hsa04514:Cell adhesion molecules (CAMs)	44	2.93333	1.84034e-13	HLA-DQB1, CLDN7, HLA-DRB1, CD8A, VTCN1, CLDN10, ITGB2, CDH1, NEO1, CLDN11, HLA-DMB, HLA-DMA, ITGAM, ITGB8, ITGAV, CD2, HLA-DPB1, HLA-DOA, HLA-DOB, PTPRC, F11R, PTPRM, NRXN3, ICAM2, ICAM3, HLA-A, NFASC, HLA-C, HLA-B, ITGA4, HLA-E, HLA-DQA1, HLA-G, HLA-F, CD86, ITGA6, CD58, PECAM1, HLA-DPA1, VCAN, JAM2, JAM3, SELE, HLA-DRA	617	142	6910	3.47022	5.08047e-11	5.08047e-11	2.4285e-10
GOTERM_CC_DIRECT	GO:0005576~extracellular region	196	13.0667	7.03915e-12	A2M, MASP2, NELL2, FSTL1, C1QC, SERPINE2, ISG15, CTGF, APOF, CFD, FAM150B, TPSB2, F11, COLEC11, PRELP, CLEC4M, C1QA, VEGFC, C1QB, LAMC3, TFPI, LAMC1, ADAMTS2, ALDOA, ENPP5, IFI30, PPT1, OAS1, FAM19A5, ITGBL1, F13B, LIF, LGALS3BP, PROCR, IGKC, LAMB1, SPP1, PLAT, GAS6, EPHA3, APOL2, LAMA2, APOL3, COL14A1, TGFBR3, BMP5, IGHG1, PZP, NPNT, FAM3B, ARSJ, LNPEP, CFHR4, IL1RAP, GPX3, CFHR5, GHR, GZMA, PRG…	1375	1610	18224	1.61351	3.97008e-09	9.9252e-10	1.03082e-08
GOTERM_CC_DIRECT	GO:0031012~extracellular matrix	59	3.93333	1.25984e-11	ASPN, AEBP1, LTBP2, IGFBP7, MMP7, MMP2, TGFB1, TGFB2, PKM, SERPINE2, TGFBI, LOXL1, SPON1, PFKP, MGP, FLNA, PRELP, BGN, F3, COL1A2, CTSD, VCAN, LAMC1, TGFB1I1, CSTA, COL1A1, MFAP4, FGFR2, FRAS1, LUM, VIM, COL3A1, DCN, TIMP2, ABI3BP, LGALS3BP, COL6A3, COL6A2, LAMB1, COL8A1, THBS2, DPT, PLAT, COL4A2, COL4A1, LGALS3, CRIP2, FBN1, EFEMP1, LMCD1, COL15A1, COL5A2, COL5A1, ANXA2, LAMA2, VWF, COL14A1, FBL…	1375	296	18224	2.64181	7.10554e-09	1.42111e-09	1.84494e-08
GOTERM_BP_DIRECT	GO:0007155~cell adhesion	79	5.26667	1.52743e-11	MPZL3, TLN2, IGFBP7, CLSTN1, PRKX, CD47, WISP1, SRPX, CD44, ROBO1, CTGF, FAP, TGFBI, CEACAM1, SPON1, F11R, ICAM2, ICAM3, IGFALS, ACKR3, CHST4, SSPN, CTNNA3, THY1, LAMC3, VCAN, SEMA4D, TGFB1I1, LAMC1, COL1A1, MFAP4, CYP1B1, GNE, NEDD9, IL32, ITGB2, CLDN10, NEO1, ITGAM, CDH6, ITGBL1, LGALS3BP, LPXN, ITGB8, FAT1, ITGAV, COL6A3, COL6A2, CD2, CD24, COL8A1, ENTPD1, GPNMB, LAMB1, THBS2, DPT, SPP1, COL4A…	1286	459	16792	2.24738	6.80013e-08	1.13336e-08	2.87127e-08
GOTERM_CC_DIRECT	GO:0005578~proteinaceous extracellular matrix	55	3.66667	2.10552e-11	ASPN, CTHRC1, LTBP2, NPNT, MMP7, MMP2, TGFB1, CHAD, GPC4, GPC3, WISP1, CTGF, CCBE1, TGFBI, LOX, SPON1, MGP, SLIT2, PRELP, BGN, LAMC3, COL1A2, VCAN, ADAMTS2, ALPL, ADAMTS17, MAMDC2, ADAMTSL2, ADAMTSL3, LUM, TIMP2, TIMP1, SMOC2, LGALS3BP, CCL21, CRISPLD2, COL6A3, COL6A2, DPT, COL4A4, FLRT2, COL4A3, FBN1, EFEMP1, CHI3L1, COL15A1, PAPLN, SPARC, COL5A2, COL5A1, VWF, OMD, COL14A1, FBLN5, TGFBR3	1375	268	18224	2.72	1.18751e-08	1.97918e-09	3.08335e-08
GOTERM_CC_DIRECT	GO:0005886~plasma membrane	411	27.4	6.38116e-11	SLC9A7, MYLIP, IGHM, MALL, CTGF, FAP, VNN1, FAS, OGT, SYK, PIK3CG, BSG, PIK3IP1, HLA-DQA1, THY1, SSTR1, IGHD, F3, TFPI, HLA-DPA1, PMP22, GRB14, HLA-DRA, RALGPS1, HLA-DRB1, KCNJ3, PROCR, RAC2, HLA-DPB1, IGKC, HLA-DOA, SLC28A1, CDC42EP3, SLC28A3, CDC42EP5, MAP2K1, TGFBR1, ATP11A, ATP11C, GAS1, FNIP2, FNBP1, RGS1, RGS4, AVPR1A, SMURF2, SYTL2, MARCKS, CD200, ATP10D, LY9, GPR88, PKM, LNPEP, IL1RAP, IG…	1375	4121	18224	1.32184	3.59898e-08	5.14139e-09	9.34467e-08
KEGG_PATHWAY	hsa05332:Graft-versus-host disease	18	1.2	3.43711e-10	HLA-DQB1, HLA-DRB1, HLA-A, HLA-C, HLA-B, HLA-DMB, HLA-E, HLA-DMA, HLA-G, HLA-DQA1, HLA-F, CD86, HLA-DPA1, HLA-DPB1, FAS, HLA-DOA, HLA-DOB, HLA-DRA	617	33	6910	6.10874	9.48643e-08	4.74321e-08	4.53458e-07
GOTERM_MF_DIRECT	GO:0005201~extracellular matrix structural constituent	23	1.53333	1.92864e-09	COL4A4, COL4A3, COL4A2, COL4A1, LUM, EFEMP2, COL3A1, FBN1, COL15A1, CHI3L1, MGP, COL5A2, MUC6, COL5A1, PRELP, BGN, COL14A1, COL27A1, COL1A2, VCAN, COL1A1, LAMC1, LAMB1	1283	67	16881	4.51673	2.52073e-06	2.52073e-06	3.15111e-06
KEGG_PATHWAY	hsa05330:Allograft rejection	18	1.2	3.32978e-09	HLA-DQB1, HLA-DRB1, HLA-A, HLA-C, HLA-B, HLA-DMB, HLA-E, HLA-DMA, HLA-G, HLA-DQA1, HLA-F, CD86, HLA-DPA1, HLA-DPB1, FAS, HLA-DOA, HLA-DOB, HLA-DRA	617	37	6910	5.44833	9.19018e-07	3.06339e-07	4.39297e-06
KEGG_PATHWAY	hsa04940:Type I diabetes mellitus	19	1.26667	4.55538e-09	HLA-DQB1, HLA-DRB1, HLA-A, HLA-C, HLA-B, HLA-DMB, HLA-E, HLA-DMA, HLA-DQA1, HLA-G, HLA-F, CD86, CPE, HLA-DPA1, HLA-DPB1, FAS, HLA-DOA, HLA-DOB, HLA-DRA	617	42	6910	5.06637	1.25728e-06	3.14321e-07	6.00991e-06
GOTERM_BP_DIRECT	GO:0007165~signal transduction	144	9.6	4.93318e-09	S100A6, GABRB3, PPP2R5C, IQGAP3, RRAD, IQGAP2, RANGAP1, ITPKB, CD53, CXCL11, IQGAP1, CXCL10, CD48, UNC5B, ANK2, ANK3, GATA3, PPP1R1A, OGT, FAS, MX1, PAG1, PTPRM, STK24, LRRC1, TNFRSF17, PDE4D, GEM, FGF21, STK4, TRAT1, VEGFC, THBD, GRB14, KALRN, PLCXD3, CDC42SE1, NEDD9, ELK3, SP110, SOX9, MDK, CD74, TAGAP, LGALS3BP, RAC2, CD69, ADRA2A, HLA-DOA, ANGPTL3, HLA-DOB, TRAF5, CDC42EP3, GABRP, TYROBP, GAB…	1286	1161	16792	1.61954	2.19623e-05	3.1375e-06	9.27339e-06
KEGG_PATHWAY	hsa05416:Viral myocarditis	22	1.46667	6.32262e-09	HLA-DQB1, HLA-DRB1, HLA-A, HLA-C, ITGB2, HLA-B, HLA-DMB, HLA-E, HLA-DMA, HLA-DQA1, HLA-G, HLA-F, CCND1, CD86, RAC2, CASP8, HLA-DPA1, HLA-DPB1, HLA-DOA, HLA-DOB, HLA-DRA, SGCB	617	57	6910	4.32256	1.74504e-06	3.49009e-07	8.34143e-06
GOTERM_BP_DIRECT	GO:0050900~leukocyte migration	31	2.06667	7.13387e-09	F2RL1, ITGB2, FPR3, ITGAM, CD74, CD48, CD47, CD44, PROCR, ITGAV, SOS1, CD2, INPP5D, CEACAM1, F11R, BSG, PODXL, ITGA4, GAS6, CD84, THBD, ITGA6, CD58, PECAM1, LCK, COL1A2, COL1A1, JAM2, JAM3, SELE, GRB14	1286	122	16792	3.3179	3.17595e-05	3.96999e-06	1.34103e-05
KEGG_PATHWAY	hsa04510:Focal adhesion	46	3.06667	8.18475e-09	TLN2, PDGFA, COL3A1, ARHGAP35, MYL9, CHAD, RAC2, ITGB8, BCL2, COL27A1, SOS1, ITGAV, COL6A3, COL6A2, PDGFD, PIK3R3, LAMB1, THBS2, SPP1, PIK3CG, COL4A4, COL4A3, COL4A2, COL4A1, MAP2K1, MET, ITGA2, ITGA4, CAPN2, COL5A2, PPP1CB, FLNA, COL5A1, PRKCB, LAMA2, VWF, VEGFC, CCND1, CCND3, ITGA6, CCND2, LAMC3, COL1A2, PDGFRA, COL1A1, LAMC1	617	206	6910	2.50083	2.25899e-06	3.76498e-07	1.07981e-05
GOTERM_CC_DIRECT	GO:0042613~MHC class II protein complex	13	0.866667	1.02179e-08	HLA-DQB1, HLA-DRB1, HLA-A, HLA-C, HLA-DMB, HLA-DMA, HLA-DQA1, CD74, HLA-DPA1, HLA-DPB1, HLA-DOA, HLA-DOB, HLA-DRA	1375	22	18224	7.8318	5.76287e-06	7.20361e-07	1.49632e-05
GOTERM_BP_DIRECT	GO:0045071~negative regulation of viral genome replication	17	1.13333	1.36079e-08	BST2, IFITM1, ZC3HAV1, OAS3, RSAD2, APOBEC3G, OAS1, IFI16, CCL5, APOBEC3F, APOBEC3C, ISG20, OASL, IFIT1, ISG15, EIF2AK2, MX1	1286	40	16792	5.54946	6.05807e-05	6.73137e-06	2.55802e-05
KEGG_PATHWAY	hsa04512:ECM-receptor interaction	27	1.8	1.66595e-08	COL3A1, CHAD, CD47, CD44, ITGB8, ITGAV, COL27A1, COL6A3, COL6A2, LAMB1, THBS2, SPP1, COL4A4, COL4A3, COL4A2, COL4A1, ITGA2, ITGA4, COL5A2, COL5A1, LAMA2, VWF, ITGA6, LAMC3, COL1A2, LAMC1, COL1A1	617	87	6910	3.47566	4.598e-06	6.56859e-07	2.19788e-05
KEGG_PATHWAY	hsa04612:Antigen processing and presentation	25	1.66667	1.7978e-08	HLA-DQB1, HLA-DRB1, CD8A, PDIA3, IFI30, HLA-DMB, HLA-DMA, CD74, HSPA2, TAP2, TAP1, HLA-DPB1, HLA-DOA, HLA-DOB, RFX5, HLA-A, HLA-C, CTSS, HLA-B, HLA-E, HLA-G, HLA-DQA1, HLA-F, HLA-DPA1, HLA-DRA	617	76	6910	3.684	4.96193e-06	6.20242e-07	2.37184e-05
GOTERM_BP_DIRECT	GO:0042493~response to drug	53	3.53333	3.11797e-08	XPO1, ADCY1, AQP1, TGFB1, TGFB2, SLC1A2, DAB1, GATA6, GATA3, NPC1L1, SEMA3C, SRD5A2, LOX, PTPRM, CST3, UGT1A1, VEGFC, CD86, CCND1, LCK, MDM2, TGIF1, ABAT, GNAS, COL1A1, AOC1, SORD, CDH1, TIMP2, MDK, TYMS, BCHE, BCL2, OXCT1, DHODH, TXNIP, SLC8A1, GNAO1, ANXA1, GGH, ITGA2, NCKAP1L, ABCB1, ACACB, DPYSL2, STAT1, ABCG2, CYBA, CDKN1A, ABCC4, ABCC1, HTR2B, DUSP6	1286	304	16792	2.27648	0.000138802	1.38811e-05	5.86116e-05
GOTERM_CC_DIRECT	GO:0009897~external side of plasma membrane	41	2.73333	6.46829e-08	IGHG1, HLA-DRB1, CD8A, VTCN1, CXCL9, KIT, IL7R, IGHM, KCNJ3, CD74, CXCL10, CD48, GPC4, CD69, ITGAV, CD2, MS4A1, IGHA1, HEG1, IL2RG, FAS, IGKC, IGLL5, CD27, PTPRC, TRPM8, CD3E, ITGA2, MCAM, ANXA5, THY1, LAMP1, CD86, CCR7, ITGA6, CCR5, IGHD, PECAM1, TGFBR3, ANTXR1, IGLC1	1375	213	18224	2.5512	3.64805e-05	4.05345e-06	9.47225e-05
GOTERM_BP_DIRECT	GO:0019882~antigen processing and presentation	19	1.26667	6.75933e-08	HLA-DQB1, MICB, RAB8B, CD8A, HLA-DRB1, HLA-A, HLA-C, HLA-B, CTSS, HLA-DMB, HLA-E, HLA-DQA1, CD74, HLA-G, PSMB8, CLEC4M, HLA-DPA1, HLA-DPB1, HLA-DRA	1286	55	16792	4.51079	0.00030088	2.73565e-05	0.000127062
GOTERM_MF_DIRECT	GO:0008201~heparin binding	34	2.26667	1.07961e-07	FGFR2, LTBP2, LXN, MMP7, FSTL1, CXCL6, CXCL11, MDK, ABI3BP, ZNF207, CXCL10, SMOC2, LPA, WISP1, SERPINE2, CRISPLD2, CTGF, ANGPTL3, GPNMB, THBS2, F11, FBN1, CECR1, CCDC80, CCL15, COL5A1, SLIT2, PRELP, PCOLCE2, TGFBR3, LIPC, PDCD5, AOC1, PLA2G5	1283	160	16881	2.79596	0.000141095	7.05499e-05	0.000176391
KEGG_PATHWAY	hsa05164:Influenza A	39	2.6	1.241e-07	HLA-DQB1, XPO1, IFIH1, HLA-DRB1, IL18, OAS3, RSAD2, OAS1, OAS2, HLA-DMB, CCL5, HLA-DMA, CXCL10, HSPA2, PYCARD, FAS, HLA-DPB1, HLA-DOA, CASP1, MX1, PIK3R3, HLA-DOB, PIK3CG, TMPRSS2, MAP2K1, STAT1, HLA-DQA1, PRKCB, IFNAR1, STAT2, TNFRSF10A, IRF9, DDX58, MAPK13, IRF7, HLA-DPA1, EIF2AK2, KPNA2, HLA-DRA	617	174	6910	2.5102	3.42511e-05	3.80573e-06	0.000163725
GOTERM_BP_DIRECT	GO:0009615~response to virus	27	1.8	1.66508e-07	IFIH1, IFITM1, ZC3HAV1, OAS3, RSAD2, OAS1, OAS2, CCL5, ISG20, IRAK3, CXCR4, GATA3, DDX60, MX1, MX2, BST2, CCL19, IFI44, TRIM22, IFNAR1, IFIT3, DDX58, IFIT2, IFIT1, OASL, IRF7, EIF2AK2	1286	110	16792	3.20503	0.000741017	6.17724e-05	0.000313001
KEGG_PATHWAY	hsa05168:Herpes simplex infection	40	2.66667	1.68185e-07	HLA-DQB1, HMGN1, IFIH1, HLA-DRB1, OAS3, OAS1, OAS2, HLA-DMB, CCL5, HLA-DMA, CD74, TAP2, CASP8, TAP1, FAS, PER3, HLA-DPB1, HLA-DOA, HLA-DOB, TRAF5, SP100, HLA-A, SKP2, HLA-C, HLA-B, STAT1, HLA-E, PPP1CB, HLA-DQA1, HLA-G, IFNAR1, HLA-F, STAT2, DDX58, IRF9, IFIT1, IRF7, HLA-DPA1, EIF2AK2, HLA-DRA	617	183	6910	2.44795	4.6418e-05	4.6419e-06	0.000221886
GOTERM_CC_DIRECT	GO:0005604~basement membrane	22	1.46667	2.44256e-07	FRAS1, COL4A3, COL4A1, NPNT, EFEMP2, FBN1, CCDC80, CST3, SPARC, COL5A1, ANXA2, ANXA2P2, TIMP1, LAMA2, SMOC2, ITGA6, LAMC3, TGFBI, LAMC1, LAMB1, THBS2, LOXL1	1375	79	18224	3.69094	0.000137751	1.37759e-05	0.000357691
GOTERM_MF_DIRECT	GO:0032395~MHC class II receptor activity	10	0.666667	2.68909e-07	HLA-DQB1, HLA-DRB1, HLA-C, HLA-DPA1, HLA-DPB1, HLA-DOA, HLA-DMA, HLA-DOB, HLA-DQA1, HLA-DRA	1283	15	16881	8.77163	0.000351403	0.000117148	0.000439356
GOTERM_BP_DIRECT	GO:0001525~angiogenesis	41	2.73333	3.37213e-07	FGFR2, CYP1B1, PDGFA, IL18, LEPR, JAG1, ELK3, MMP2, RNF213, PRKX, TGFB2, TSPAN12, HEY1, UNC5B, CTGF, ITGAV, FAP, TGFBI, TMEM100, ANGPTL3, COL8A1, RAMP1, CEACAM1, SYK, PIK3CG, KLF5, COL4A2, NRXN3, COL15A1, ACKR3, MCAM, SIRT1, ANXA2, THY1, THSD7A, HOXB3, VEGFC, NUS1, PECAM1, JAM3, TNFAIP2	1286	223	16792	2.40071	0.00150015	0.000115476	0.000633891
GOTERM_MF_DIRECT	GO:0042605~peptide antigen binding	13	0.866667	3.38401e-07	HLA-DQB1, HLA-DRB1, TAP1, HLA-A, HLA-C, HLA-DPA1, HLA-B, HLA-DPB1, HLA-E, HLA-DQA1, CLEC4M, HLA-DRA, HLA-F	1283	28	16881	6.10881	0.000442193	0.000110567	0.000552895
GOTERM_CC_DIRECT	GO:0005829~cytosol	321	21.4	4.44272e-07	SCPEP1, MOCOS, LDHB, GDA, S100A6, A2M, PPP2R5C, RANGAP1, MYLIP, RNF213, BBOX1, GET4, SERPINE2, ISG15, VPS13C, CTGF, MAT1A, EIF1AX, CH25H, RAPGEF6, RAPGEF4, FAS, OGT, MUC13, SYK, PIK3CG, CAPNS1, CRYAB, HKDC1, SKP2, THY1, PTRF, SULT1B1, TACSTD2, CCR2, EIF2AK2, GRB14, ALDOA, RBP1, HSD17B14, OAS3, RABEPK, AKAP13, IGF2BP2, OAS1, PPT1, OAS2, IFI35, GPD1L, RAC2, HNMT, DNMT3L, FBXO4, CDC42EP3, CDC42EP5, …	1375	3315	18224	1.2834	0.000250538	2.27788e-05	0.000650596
GOTERM_CC_DIRECT	GO:0071556~integral component of lumenal side of endoplasmic reticulum membrane	13	0.866667	4.98413e-07	HLA-DQB1, HLA-DRB1, HLA-A, HLA-C, HLA-DPA1, HLA-B, HLA-DPB1, HLA-E, CD74, HLA-DQA1, HLA-G, HLA-DRA, HLA-F	1375	29	18224	5.94137	0.000281066	2.34251e-05	0.000729881
GOTERM_MF_DIRECT	GO:0023026~MHC class II protein complex binding	10	0.666667	5.73087e-07	PKM, HLA-DRB1, ANXA11, MS4A1, HLA-DMB, HLA-DOA, HLA-DMA, HLA-DOB, CD74, HLA-DRA	1283	16	16881	8.2234	0.000748745	0.000149794	0.000936334
GOTERM_BP_DIRECT	GO:0030574~collagen catabolic process	19	1.26667	8.70927e-07	COL4A4, COL4A3, COL4A2, COL4A1, COL3A1, COL15A1, MMP7, CTSS, COL5A2, MMP2, COL5A1, CTSK, COL6A3, COL6A2, COL1A2, CTSD, COL1A1, COL8A1, ADAMTS2	1286	64	16792	3.87646	0.00386986	0.000276917	0.00163716
GOTERM_BP_DIRECT	GO:0002504~antigen processing and presentation of peptide or polysaccharide antigen via MHC class II	10	0.666667	1.21086e-06	HLA-DQB1, HLA-DRB1, HLA-DPA1, HLA-DPB1, HLA-DMB, HLA-DOA, HLA-DMA, HLA-DOB, HLA-DQA1, HLA-DRA	1286	17	16792	7.68091	0.00537627	0.00035932	0.00227616
GOTERM_BP_DIRECT	GO:0002407~dendritic cell chemotaxis	10	0.666667	1.21086e-06	PIK3CG, TRPM4, GPR183, CCR7, CCR5, CXCR4, CCL21, CCR2, CCL19, CCL5	1286	17	16792	7.68091	0.00537627	0.00035932	0.00227616
KEGG_PATHWAY	hsa05320:Autoimmune thyroid disease	18	1.2	1.27978e-06	HLA-DQB1, HLA-DRB1, HLA-A, HLA-C, HLA-B, HLA-DMB, HLA-E, HLA-DMA, HLA-G, HLA-DQA1, HLA-F, CD86, HLA-DPA1, HLA-DPB1, FAS, HLA-DOA, HLA-DOB, HLA-DRA	617	52	6910	3.8767	0.000353157	3.21104e-05	0.0016884
GOTERM_BP_DIRECT	GO:0006935~chemotaxis	27	1.8	1.41544e-06	CXCL1, ENPP2, CXCL2, CXCL9, CXCL6, CXCL11, CCL5, CXCL10, DOCK2, RAC2, CCL20, CXCR4, CXCR6, DEFB1, PLP2, PIK3C2G, MAP2K1, NCKAP1L, ACKR3, CCL15, LGALS9, CCL18, CCR7, CCR5, CCR2, CMTM8, CMTM7	1286	122	16792	2.88978	0.00628175	0.00039377	0.00266072
KEGG_PATHWAY	hsa04672:Intestinal immune network for IgA production	17	1.13333	1.42555e-06	HLA-DQB1, HLA-DRB1, TNFRSF17, ITGA4, PIGR, HLA-DMB, HLA-DMA, TGFB1, HLA-DQA1, CD86, TNFSF13B, CXCR4, HLA-DPA1, HLA-DPB1, HLA-DOA, HLA-DOB, HLA-DRA	617	47	6910	4.05083	0.000393374	3.27871e-05	0.00188071
GOTERM_CC_DIRECT	GO:0005887~integral component of plasma membrane	155	10.3333	1.52903e-06	ADCY1, TUSC3, GABRB3, TSPAN3, F2RL1, CD52, CD53, JAG1, AQP1, AQP3, CD48, CD47, CD44, ROBO1, MS4A1, FAS, PAG1, FLVCR1, BSG, PTPRM, BST2, CD3E, HLA-A, HLA-C, MRGPRF, DLL1, HLA-B, SSPN, HLA-DQA1, TRAT1, THY1, CLEC4M, VSIG2, CD37, THBD, CCR5, SSTR1, TACSTD2, CCR2, VAMP5, PDGFRA, HLA-DPA1, SLC38A1, VAMP1, HLA-DRA, FGFR2, SLC38A4, SLC2A13, HLA-DRB1, ENPP1, ENPP2, ENPP3, MME, P2RY8, LAPTM5, PROCR, CD69,…	1375	1415	18224	1.45183	0.000862	6.63341e-05	0.00223911
GOTERM_CC_DIRECT	GO:0016020~membrane	223	14.8667	1.90689e-06	LDHB, CD52, RNF213, ACBD5, CD48, CLPTM1L, RAPGEF4, FAS, PIK3CG, F11, RECK, BSG, CAPNS1, GBP5, LRRC1, GEM, HLA-DQA1, CLEC4M, VEGFC, TTPAL, VSIG2, CD37, LAMC3, TACSTD2, PDGFRA, YME1L1, EIF2AK2, BTN3A3, BTN3A2, ALDOA, ERMP1, HLA-DRB1, AKAP13, PPT1, OAS2, CD74, LGALS3BP, RAC2, HLA-DPB1, SLC28A1, CDC42EP5, OSBPL3, LGALS3, TGFBR1, ATP11A, NCKAP1L, RERG, APOL2, APOL3, OASL, FAM151A, CD59, CD58, RHEB, SY…	1375	2200	18224	1.34346	0.00107491	7.68177e-05	0.00279245
KEGG_PATHWAY	hsa05150:Staphylococcus aureus infection	18	1.2	2.31975e-06	HLA-DQB1, HLA-DRB1, MASP2, FPR3, ITGB2, HLA-DMB, HLA-DMA, C1QC, ITGAM, HLA-DQA1, C1QA, C1QB, HLA-DPA1, HLA-DPB1, HLA-DOA, CFD, HLA-DOB, HLA-DRA	617	54	6910	3.73312	0.000640047	4.92489e-05	0.0030604
KEGG_PATHWAY	hsa05145:Toxoplasmosis	28	1.86667	3.33536e-06	HLA-DQB1, HLA-DRB1, HLA-DMB, HLA-DMA, TGFB1, TGFB2, HSPA2, IL10RA, BCL2, CASP8, HLA-DPB1, PIK3R3, LAMB1, HLA-DOA, HLA-DOB, PIK3CG, GNAO1, STAT1, HLA-DQA1, LAMA2, ITGA6, CCR5, LAMC3, MAPK13, HLA-DPA1, LAMC1, ALOX5, HLA-DRA	617	118	6910	2.65747	0.000920138	6.57522e-05	0.00440025
GOTERM_BP_DIRECT	GO:0030199~collagen fibril organization	14	0.933333	3.58354e-06	CYP1B1, LUM, TGFBR1, COL3A1, COL5A2, COL5A1, TGFB2, ANXA2, COL14A1, COL1A2, LOX, COL1A1, ADAMTS2, DPT	1286	39	16792	4.68732	0.0158274	0.000938028	0.00673613
GOTERM_CC_DIRECT	GO:0042383~sarcolemma	21	1.4	3.75479e-06	SLC8A1, BSG, ANXA1, AQP1, SSPN, ANXA2, LAMA2, LAMP1, KRT19, ABCC9, BGN, ANK2, ANK3, CD59, KRT8, COL6A3, SNTB1, COL6A2, SGCE, SGCB, DTNA	1375	85	18224	3.27447	0.00211546	0.00014117	0.00549842
GOTERM_CC_DIRECT	GO:0012507~ER to Golgi transport vesicle membrane	16	1.06667	4.17946e-06	HLA-DQB1, HLA-DRB1, HLA-A, HLA-C, HLA-B, HLA-E, LMAN1, HLA-G, CD74, HLA-DQA1, HLA-F, CD59, MCFD2, HLA-DPA1, HLA-DPB1, HLA-DRA	1375	52	18224	4.0781	0.00235445	0.000147316	0.00612029
KEGG_PATHWAY	hsa05146:Amoebiasis	26	1.73333	4.31549e-06	ADCY1, COL3A1, ITGB2, ITGAM, TGFB1, TGFB2, COL27A1, LAMB1, PIK3R3, COL4A4, PIK3CG, COL4A3, COL4A2, COL4A1, COL5A2, COL5A1, PRKCB, LAMA2, C8A, C8B, SERPINB9, LAMC3, COL1A2, GNAS, COL1A1, LAMC1	617	106	6910	2.74701	0.00119037	7.94021e-05	0.00569328
GOTERM_BP_DIRECT	GO:0002250~adaptive immune response	29	1.93333	6.658e-06	TNFRSF21, GPR183, VTCN1, IGHM, SH2D1A, TAP2, TAP1, PAG1, SYK, PIK3CG, TRPM4, ITK, THEMIS, ANXA1, TNFRSF17, SLAMF7, CTSS, HLA-E, TRAT1, CD1E, PRKCB, CLEC4M, CD84, BTN3A1, CD86, LAMP3, JAK3, PRDM1, JAM3	1286	148	16792	2.55857	0.0292065	0.0016454	0.012515
GOTERM_BP_DIRECT	GO:0050852~T cell receptor signaling pathway	29	1.93333	6.658e-06	HLA-DQB1, TNFRSF21, HLA-DRB1, CD247, PTPN22, TRAC, GATA3, INPP5D, HLA-DPB1, PAG1, FYB, PTPRC, ITK, CD3D, THEMIS, CD3E, PDE4D, TRBC1, HLA-DQA1, TRAT1, PSMB8, THY1, PSMB9, PRKCQ, BTN3A1, LCK, HLA-DPA1, LCP2, HLA-DRA	1286	148	16792	2.55857	0.0292065	0.0016454	0.012515
GOTERM_MF_DIRECT	GO:0005509~calcium ion binding	88	5.86667	8.01989e-06	ASPN, PDP1, S100A4, S100A6, CLSTN2, LTBP2, MASP2, NPNT, CLSTN1, NELL2, FSTL1, JAG1, TTN, IQGAP1, EFHD1, GSN, SLC25A24, ITIH1, CCBE1, ASPH, CAPNS1, MAN1A2, VIL1, MGP, DLL1, TC2N, MAN1A1, SLIT2, MCTP1, ANXA2P2, RAB11FIP3, THBD, NUCB2, VCAN, AOC1, TBC1D8B, PLA2G5, MYO5A, GALNT3, ENPP1, ENPP2, CDH1, TPM4, CDH6, MYL9, DGKA, SMOC2, ANXA8, PRRG4, ANXA9, GNPTAB, CD69, FAT1, RASGRP1, HEG1, THBS2, EHD4, SL…	1283	717	16881	1.61486	0.0104273	0.00174548	0.0131025
GOTERM_BP_DIRECT	GO:0070374~positive regulation of ERK1 and ERK2 cascade	32	2.13333	8.95183e-06	FGFR2, GPR183, PDGFA, NPNT, F2RL1, PTPN22, CCL5, CD74, TGFB1, CD44, CCL20, CTGF, CCL21, RASGRP1, PYCARD, PDGFD, FAM150B, GPNMB, MAP2K1, CHI3L1, CCL19, ACKR3, GPER1, FGF21, CCL15, GAS6, LGALS9, CCL18, CCR7, PDGFRA, HTR2B, PLA2G5	1286	175	16792	2.38766	0.03907	0.00209537	0.0168263
GOTERM_CC_DIRECT	GO:0045121~membrane raft	35	2.33333	1.20566e-05	LDHB, ADCY1, PPT1, GPRC5B, IQGAP1, CD48, MALL, ANK2, UNC5B, CASP8, FAS, INPP5D, CD24, PAG1, RAP2B, PTPRC, BSG, TRPM8, BST2, TGFBR1, PODXL, DLL1, CAPN2, ANXA2, THY1, CBLB, PTRF, LCK, PECAM1, ACE2, CMTM8, CTSD, ANXA13, SMURF2, SELE	1375	206	18224	2.25186	0.00677689	0.000399917	0.0176544
GOTERM_BP_DIRECT	GO:0022617~extracellular matrix disassembly	19	1.26667	1.25505e-05	A2M, BSG, CAPNS1, FBN1, MMP7, CDH1, CTSS, DCN, TIMP2, CAPN2, MMP2, TIMP1, CTSK, CD44, GSN, CAPG, LAMC1, TPSAB1, SPP1	1286	76	16792	3.26439	0.0543428	0.00278986	0.0235898
GOTERM_CC_DIRECT	GO:0005581~collagen trimer	21	1.4	1.34328e-05	COL4A4, COL4A3, CTHRC1, COL3A1, COL15A1, COLEC11, C1QC, COL5A2, COL5A1, TIMP1, C1QA, C1QTNF7, C1QB, COL14A1, COL27A1, COL6A3, CCBE1, COL1A2, COL6A2, COL1A1, LOX	1375	92	18224	3.02533	0.00754753	0.000420809	0.0196694
GOTERM_BP_DIRECT	GO:0002480~antigen processing and presentation of exogenous peptide antigen via MHC class I, TAP-independent	7	0.466667	1.3631e-05	LNPEP, HLA-A, HLA-C, HLA-B, HLA-E, HLA-G, HLA-F	1286	9	16792	10.1559	0.0588808	0.00288561	0.0256204
GOTERM_BP_DIRECT	GO:0045087~innate immune response	59	3.93333	1.62171e-05	IGHG1, ZC3HAV1, F2RL1, APOBEC3G, LY9, IGHM, APOBEC3F, C1QC, LGR4, APOBEC3C, APOBEC3B, TRIM5, NLRC5, SH2D1A, TMEM173, GATA3, DDX60, IL1RAP, VNN1, ITCH, MX1, IGLL5, MX2, SYK, PIK3CG, BST2, HERC5, HLA-C, HLA-B, IFI16, GPER1, HLA-E, CLEC4M, C1QA, CD84, C1QB, TRIM31, IGHD, LCK, PRDM1, RNF135, EIF2AK2, IFIH1, TRIM15, PYCARD, IGHA1, IGKC, DEFB1, TYROBP, ITK, LGALS3, ANXA1, TRIM21, DDX58, CYBA, CORO1A, I…	1286	430	16792	1.79162	0.0696543	0.0032764	0.0304805
GOTERM_BP_DIRECT	GO:0071345~cellular response to cytokine stimulus	10	0.666667	1.74293e-05	PID1, CD86, CCR7, CXCR4, HCLS1, FOXF1, MME, LEF1, DPYSL3, ITGA4	1286	22	16792	5.93525	0.0746617	0.00336805	0.0327585
GOTERM_BP_DIRECT	GO:0016337~single organismal cell-cell adhesion	22	1.46667	2.11629e-05	MPZL2, PKHD1, ICAM2, ICAM3, FBLIM1, CDH1, SOX9, CTNNA3, THY1, COL14A1, ANXA9, ITGA6, CD44, TENM2, FOXF1, FAT1, CD58, CD2, VNN1, CSTA, CD24, JAM2	1286	101	16792	2.84422	0.0899159	0.00391806	0.0397745
KEGG_PATHWAY	hsa04151:PI3K-Akt signaling pathway	55	3.66667	2.3045e-05	PDGFA, PPP2R5C, CHAD, EIF4EBP1, PDGFD, GHR, SYK, PIK3CG, RXRA, FGF21, IFNAR1, VEGFC, CCND1, CCND3, LAMC3, CCND2, COL1A2, PDGFRA, MDM2, COL1A1, LAMC1, FGFR2, COL3A1, KIT, IL7R, ITGB8, BCL2, COL27A1, ITGAV, SOS1, COL6A3, COL6A2, IL2RG, PRKAA2, LAMB1, PIK3R3, THBS2, SPP1, COL4A4, COL4A3, COL4A2, COL4A1, MAP2K1, MET, ITGA2, ITGA4, COL5A2, BRCA1, COL5A1, LAMA2, VWF, CDKN1A, ITGA6, RHEB, JAK3	617	345	6910	1.7854	0.00634032	0.000397452	0.030399
KEGG_PATHWAY	hsa04145:Phagosome	31	2.06667	2.58522e-05	HLA-DQB1, HLA-DRB1, ITGB2, HLA-DMB, HLA-DMA, ITGAM, ITGAV, TAP2, TAP1, HLA-DPB1, HLA-DOA, TUBA1A, THBS2, HLA-DOB, SEC61A2, HLA-A, ITGA2, HLA-C, COLEC11, HLA-B, CTSS, HLA-E, HLA-G, HLA-DQA1, HLA-F, CLEC4M, LAMP1, CYBA, CORO1A, HLA-DPA1, HLA-DRA	617	153	6910	2.26915	0.00710991	0.000419636	0.0341015
KEGG_PATHWAY	hsa05166:HTLV-I infection	44	2.93333	2.96454e-05	HLA-DQB1, XPO1, E2F3, ADCY1, ADCY7, HLA-DRB1, TLN2, PDGFA, ITGB2, MYBL1, HLA-DMB, HLA-DMA, TGFB1, TGFB2, POLE2, MAP3K1, IL2RG, HLA-DPB1, HLA-DOA, PIK3R3, HLA-DOB, PIK3CG, CD3D, CD3E, TGFBR1, HLA-A, HLA-C, HLA-B, RB1, HLA-E, HLA-DQA1, FZD7, HLA-G, HLA-F, CCND1, CDKN1A, CCND3, CCND2, ETS1, LCK, PDGFRA, HLA-DPA1, JAK3, HLA-DRA	617	256	6910	1.92489	0.00814886	0.000454466	0.0391041
GOTERM_MF_DIRECT	GO:0005518~collagen binding	16	1.06667	3.03463e-05	ASPN, VWF, CTSK, COL14A1, CD44, PDGFA, LUM, TGFBI, CCBE1, ITGA2, DCN, CTSS, SPARC, ANTXR1, ABI3BP, PCOLCE2	1283	60	16881	3.50865	0.0388869	0.00565014	0.0495696
KEGG_PATHWAY	hsa04670:Leukocyte transendothelial migration	26	1.73333	3.15692e-05	CLDN7, ARHGAP35, ITGB2, CLDN10, CLDN11, MMP2, ITGAM, MYL9, EZR, RAC2, CXCR4, RAPGEF4, PIK3R3, RHOH, PIK3CG, ITK, F11R, ITGA4, CTNNA3, THY1, PRKCB, CYBA, MAPK13, PECAM1, JAM2, JAM3	617	118	6910	2.46765	0.00867538	0.000458486	0.0416412
GOTERM_BP_DIRECT	GO:0042102~positive regulation of T cell proliferation	16	1.06667	3.31629e-05	PTPRC, CD3E, VTCN1, ANXA1, CCL19, NCKAP1L, HLA-DMB, CCL5, PRKCQ, NCK2, CORO1A, TNFSF13B, CD59, HLA-DPA1, HLA-DPB1, JAK3	1286	60	16792	3.48201	0.137261	0.00588834	0.0623212
GOTERM_BP_DIRECT	GO:0050776~regulation of immune response	31	2.06667	3.34356e-05	MICB, CD8A, IFITM1, IGLV1-44, IGKV1-17, COL3A1, CD247, ITGB2, SH2D1A, TRAC, CLEC2D, IGKC, TYROBP, CD3D, CD3E, ICAM2, ICAM3, HLA-A, HLA-C, ITGA4, SLAMF7, HLA-B, TRBC1, HLA-E, HLA-G, HLA-F, IRF7, COL1A2, COL1A1, IGLC1, CD200	1286	178	16792	2.27407	0.138309	0.00570895	0.0628336
GOTERM_MF_DIRECT	GO:0008092~cytoskeletal protein binding	14	0.933333	4.10866e-05	ALDOA, SLC8A1, PTPN3, EPB41L4A, MYLIP, EPB41L4B, CAPN2, TPM1, ANXA2, ANXA2P2, CORO1A, PACSIN3, ANK3, EPB41L5	1283	48	16881	3.83759	0.0522849	0.00669019	0.0671082
GOTERM_MF_DIRECT	GO:0042803~protein homodimerization activity	86	5.73333	4.72452e-05	SLC9A7, S100A6, CD8A, PDGFA, APOBEC3G, UXS1, TGFB1, TGFB2, TRIM5, TMEM173, FAP, SLC51A, NR2F2, BHLHE41, CEACAM1, MUC13, GHR, AADAT, SP100, CTBP2, PRTFDC1, TRPM8, BST2, CRYAB, GZMA, VIL1, CECR1, PFKM, UGT1A1, STK4, HLA-G, SLIT2, FLNA, C1QB, ASCL1, RBPMS, RAB11FIP3, DGAT2, CCR2, PDGFRA, ABAT, JAM3, AOC1, FGFR2, ENPP1, CD247, DCK, PLVAP, RDX, KIT, CCL5, ACAT1, GPD1L, TYMS, IRAK3, ANXA9, BCL2, OXCT1,…	1283	730	16881	1.55005	0.059883	0.00683773	0.0771635
GOTERM_BP_DIRECT	GO:0006954~inflammatory response	52	3.46667	5.48837e-05	LXN, IL18, F2RL1, CXCL11, TGFB1, CXCL10, CXCR4, IL1RAP, CXCR6, VNN1, FAS, ITCH, SYK, PIK3CG, F11R, SP100, GBP5, LYZ, CHST4, IFI16, GPER1, TNFRSF10A, PRKCQ, CCR7, CCR5, CCR2, CXCL1, TNFRSF21, CXCL2, CXCL9, ITGB2, FPR3, KIT, CXCL6, CCL5, CCL20, CCL21, PYCARD, CD27, SPP1, LY75, CHI3L1, ANXA1, CCL19, CCL15, LGALS9, CCL18, CYBA, APOL3, AOX1, PLA2G4C, SELE	1286	379	16792	1.79154	0.216786	0.00900913	0.10312
GOTERM_BP_DIRECT	GO:0008360~regulation of cell shape	26	1.73333	5.5842e-05	ALDOA, FERMT2, CDC42SE1, ARHGAP18, ARHGAP35, RDX, ITGB2, KIT, TPM1, EZR, WIPF3, WIPF1, CDC42EP3, FGD4, CDC42EP5, CSNK1A1, ARHGEF18, VIL1, ANXA1, FBLIM1, EPB41L3, MYO10, CORO1A, CDC42SE2, CFDP1, SEMA4D	1286	140	16792	2.42497	0.22012	0.00883983	0.10492
GOTERM_CC_DIRECT	GO:0042612~MHC class I protein complex	7	0.466667	6.02928e-05	HLA-DQB1, HLA-A, HLA-C, HLA-B, HLA-E, HLA-G, HLA-F	1375	11	18224	8.43425	0.0334345	0.0017882	0.0882574
GOTERM_MF_DIRECT	GO:0004859~phospholipase inhibitor activity	7	0.466667	6.27763e-05	ANXA1, ANGPTL3, ANXA5, ANXA4, ANXA3, ANXA2, ANXA2P2	1283	11	16881	8.37292	0.0787753	0.00817156	0.102518
GOTERM_MF_DIRECT	GO:0048407~platelet-derived growth factor binding	7	0.466667	6.27763e-05	COL4A1, PDGFA, COL3A1, PDGFRA, COL1A2, COL1A1, COL5A1	1283	11	16881	8.37292	0.0787753	0.00817156	0.102518
GOTERM_BP_DIRECT	GO:0031295~T cell costimulation	18	1.2	6.77417e-05	HLA-DQB1, HLA-DRB1, CD3D, CD3E, CD247, CCL19, TRBC1, HLA-DQA1, CD86, TRAC, TNFSF13B, CCL21, MAPKAP1, LCK, HLA-DPA1, CD24, HLA-DPB1, HLA-DRA	1286	78	16792	3.01328	0.260363	0.010346	0.127264
KEGG_PATHWAY	hsa04974:Protein digestion and absorption	21	1.4	6.87137e-05	COL4A4, COL4A3, FXYD2, COL4A2, SLC8A1, COL4A1, SLC16A10, COL3A1, COL15A1, MME, SLC3A1, COL5A2, COL5A1, COL14A1, COL27A1, COL6A3, ACE2, COL6A2, COL1A2, CPA3, COL1A1	617	88	6910	2.67257	0.0187869	0.000947833	0.0906161
KEGG_PATHWAY	hsa05323:Rheumatoid arthritis	21	1.4	6.87137e-05	HLA-DQB1, HLA-DRB1, IL18, ITGB2, CXCL6, HLA-DMB, CCL5, HLA-DMA, HLA-DQA1, TGFB1, TGFB2, CTSK, CD86, TNFSF13B, CCL20, HLA-DPA1, HLA-DPB1, HLA-DOA, LTB, HLA-DOB, HLA-DRA	617	88	6910	2.67257	0.0187869	0.000947833	0.0906161
GOTERM_BP_DIRECT	GO:0070098~chemokine-mediated signaling pathway	17	1.13333	7.19288e-05	CXCL1, CXCL2, CXCL9, CCL19, ACKR3, CXCL6, CXCL11, CCL5, CCL15, CCL18, CXCL10, CCR5, CCL20, CXCR4, CCL21, CCR2, CXCR6	1286	71	16792	3.12645	0.274024	0.0106178	0.135125
GOTERM_MF_DIRECT	GO:0005544~calcium-dependent phospholipid binding	15	1	8.4026e-05	ANXA1, TC2N, ANXA5, ANXA4, ANXA3, ANXA2, ANXA2P2, MCTP1, ANXA8, ANXA9, ANXA10, ANXA11, ANXA13, SYT13, SYTL2	1283	58	16881	3.40279	0.10401	0.00993456	0.137197
GOTERM_CC_DIRECT	GO:0005925~focal adhesion	52	3.46667	8.6805e-05	KIF22, ENAH, PDIA3, TLN2, FERMT2, IQGAP1, DAB2, CD44, GSN, FAP, SNTB1, BSG, FBLIM1, PALLD, NEXN, PPP1CB, FLNA, THY1, ARPC1B, TNS1, CCND3, EPB41L5, TGFB1I1, PNMA1, VIM, MME, NEDD9, RDX, CDH1, TPM4, LPXN, EZR, RAC2, PROCR, ITGAV, FAT1, FLRT2, PTPRC, MAP2K1, ANXA1, NFASC, ITGA2, SYNPO2, ITGA4, ANXA5, CAPN2, MCAM, CYBA, ITGA6, CD59, MARCKS, GRK5	1375	391	18224	1.76266	0.0477809	0.00244501	0.127043
GOTERM_BP_DIRECT	GO:0060326~cell chemotaxis	16	1.06667	8.99739e-05	CXCL1, CXCL2, CXCL9, LEF1, CCL19, FPR3, CXCL6, KIT, CCL5, CCL15, ELMO2, CXCL10, PRKCQ, CCL20, CCL21, PDGFRA	1286	65	16792	3.21416	0.33007	0.0128389	0.168997
KEGG_PATHWAY	hsa05162:Measles	27	1.8	9.34632e-05	IFIH1, OAS3, OAS1, OAS2, SH2D1A, HSPA2, IL2RG, FAS, MX1, PIK3R3, PIK3CG, CD3D, CD3E, STAT1, CLEC4M, STAT2, IFNAR1, TNFRSF10A, DDX58, IRF9, PRKCQ, CCND1, CCND3, CCND2, IRF7, JAK3, EIF2AK2	617	133	6910	2.27355	0.0254672	0.00122768	0.123236
GOTERM_MF_DIRECT	GO:0005178~integrin binding	21	1.4	0.00010884	COL4A3, NPNT, ICAM2, COL3A1, FBN1, ICAM3, ITGA2, TIMP2, COL5A1, THY1, VWF, WISP1, ITGA6, CTGF, FAP, FBLN5, TGFBI, ANGPTL3, GPNMB, JAM3, SYK	1283	105	16881	2.63149	0.132606	0.0117852	0.17768
KEGG_PATHWAY	hsa05140:Leishmaniasis	18	1.2	0.000120531	HLA-DQB1, HLA-DRB1, ITGB2, ITGA4, HLA-DMB, STAT1, HLA-DMA, ITGAM, HLA-DQA1, TGFB1, TGFB2, CYBA, MAPK13, HLA-DPA1, HLA-DPB1, HLA-DOA, HLA-DOB, HLA-DRA	617	71	6910	2.83927	0.0327213	0.00151107	0.1589
KEGG_PATHWAY	hsa04640:Hematopoietic cell lineage	20	1.33333	0.00013159	CD8A, HLA-DRB1, CD3D, CD3E, MME, ITGA2, KIT, ITGA4, IL7R, ITGAM, CD1E, CD37, ITGA6, CD44, CD59, MS4A1, CD2, CD24, CSF2RA, HLA-DRA	617	85	6910	2.63514	0.0356696	0.00157794	0.173468
KEGG_PATHWAY	hsa05222:Small cell lung cancer	20	1.33333	0.00013159	COL4A4, PIK3CG, COL4A3, COL4A2, E2F3, COL4A1, RXRA, SKP2, ITGA2, RB1, LAMA2, CCND1, ITGA6, LAMC3, ITGAV, BCL2, LAMC1, LAMB1, PIK3R3, TRAF5	617	85	6910	2.63514	0.0356696	0.00157794	0.173468
GOTERM_MF_DIRECT	GO:0051015~actin filament binding	24	1.6	0.000142891	MICALL2, TLN2, VIL1, IQGAP2, TPM2, TTN, NEXN, TPM1, TPM4, CTNNA3, FLNA, ARPC1B, PPP1R9A, ANXA8, CORO1A, MYO10, EZR, CFL2, MYH11, WIPF3, MARCKS, ANTXR1, WIPF1, RCSD1	1283	132	16881	2.39226	0.170367	0.0142643	0.233206
GOTERM_BP_DIRECT	GO:0007229~integrin-mediated signaling pathway	20	1.33333	0.000159452	FUT8, COL3A1, FERMT2, ITGA2, NEDD9, ITGB2, ITGA4, ITGAM, ITGBL1, CD47, DAB2, ITGA6, CTGF, ITGB8, ITGAV, ANGPTL3, ADAMDEC1, CEACAM1, SYK, TYROBP	1286	99	16792	2.63789	0.508326	0.0219413	0.299314
GOTERM_BP_DIRECT	GO:0050853~B cell receptor signaling pathway	14	0.933333	0.000166029	IGHG1, PTPRC, NCKAP1L, IGHM, PRKCB, KLHL6, IGHD, BCL2, LCK, IGHA1, IGKC, IGLC1, IGLL5, SYK	1286	54	16792	3.38529	0.522515	0.0221517	0.311641
GOTERM_CC_DIRECT	GO:0043202~lysosomal lumen	18	1.2	0.000174039	LUM, IFI30, CTSA, GYG2, PPT1, CTSS, DCN, CD74, CD1E, PRELP, GPC4, OMD, BGN, GPC3, RNASET2, CTSD, VCAN, NEU4	1375	85	18224	2.80669	0.0935019	0.00466368	0.254562
GOTERM_BP_DIRECT	GO:0006909~phagocytosis	13	0.866667	0.000200482	CSNK1A1, CORO1A, CDC42SE2, LEPR, PECAM1, ANXA11, ICAM3, ANXA1, CDC42SE1, ITGB2, CD302, GAS6, ANXA3	1286	48	16792	3.53642	0.590426	0.0259124	0.376195
GOTERM_BP_DIRECT	GO:0097284~hepatocyte apoptotic process	7	0.466667	0.000212923	PIK3CG, KRT18, GSN, KRT8, RB1, FAS, STK4	1286	13	16792	7.03098	0.612498	0.0267231	0.399495
GOTERM_MF_DIRECT	GO:0005515~protein binding	729	48.6	0.000220413	PDP1, LDHB, SLC9A7, A2M, LTBP2, MASP2, PPP2R5C, RANGAP1, FSTL1, MYLIP, IGHM, NMRK1, TMEM140, SH3YL1, MALL, FLI1, ISG15, SERPINE2, CTGF, PPP1R1A, FAP, OGT, FAS, FAM150B, TPSB2, ZNF101, SYK, PIK3CG, BSG, PTPRM, TNIK, GBP5, PCBD2, CRYAB, AIG1, RXRA, SKP2, DCDC2, GEM, PIK3IP1, CTNNA3, THY1, NME5, TAGLN, GGACT, PTRF, TMEM139, SPAG4, F3, TGIF1, VGLL4, PMP22, EIF2AK2, RTP4, HSD17B14, PPT1, KCNJ3, PROCR,…	1283	8785	16881	1.09184	0.250322	0.0203691	0.359513
GOTERM_BP_DIRECT	GO:0050870~positive regulation of T cell activation	8	0.533333	0.000226643	CD47, PRKCQ, CCR2, LCK, PYCARD, HLA-DPA1, HLA-DPB1, THY1	1286	18	16792	5.80335	0.635463	0.0276421	0.425185
KEGG_PATHWAY	hsa05200:Pathways in cancer	57	3.8	0.000228279	E2F3, ADCY1, ADCY7, PDGFA, MITF, MMP2, TGFB1, TGFB2, CXCR4, CASP8, FAS, CSF2RA, PIK3CG, AR, CTBP2, PTGER4, RXRA, SKP2, LEF1, RB1, FGF21, STK4, CTNNA3, PRKCB, VEGFC, CCND1, LAMC3, PDGFRA, MDM2, GNAS, LAMC1, FGFR2, EGLN3, CDH1, KIT, RAC2, BCL2, RASGRP1, ITGAV, SOS1, LAMB1, PIK3R3, TRAF5, COL4A4, COL4A3, COL4A2, COL4A1, MAP2K1, TGFBR1, MET, ITGA2, STAT1, FZD7, LAMA2, CDKN1A, CBLB, ITGA6	617	393	6910	1.62433	0.061068	0.00262206	0.30075
GOTERM_BP_DIRECT	GO:0035457~cellular response to interferon-alpha	6	0.4	0.000252662	IFIT3, IFIT2, GATA3, OAS1, GAS6, IFNAR1	1286	9	16792	8.70503	0.675346	0.0299477	0.473888
KEGG_PATHWAY	hsa04060:Cytokine-cytokine receptor interaction	38	2.53333	0.000263455	TNFRSF21, PDGFA, LEPR, IL18, CXCL9, KIT, IL7R, CCL5, CXCL11, TGFB1, CXCL10, TGFB2, LIF, CCL20, CXCR4, CCL21, IL10RA, CXCR6, IL1RAP, TNFRSF19, IL2RG, FAS, LTB, CD27, CSF2RA, GHR, TGFBR1, MET, TNFRSF17, CCL19, ACKR3, IFNAR1, VEGFC, CCR7, TNFSF13B, CCR5, CCR2, PDGFRA	617	230	6910	1.85033	0.0701419	0.0029047	0.347019
GOTERM_MF_DIRECT	GO:0015026~coreceptor activity	10	0.666667	0.000270532	CD86, CCR5, CD8A, CXCR4, ITGAV, CXCR6, TGFBR3, ACKR3, ITGA4, RAMP1	1283	30	16881	4.38581	0.297867	0.0232998	0.441092
KEGG_PATHWAY	hsa04610:Complement and coagulation cascades	17	1.13333	0.0002824	F11, PLAT, C7, A2M, MASP2, C1QC, C1QA, F13B, C8A, C1QB, VWF, C8B, THBD, F3, CD59, TFPI, CFD	617	69	6910	2.75926	0.0749924	0.00299371	0.371929
GOTERM_BP_DIRECT	GO:0002474~antigen processing and presentation of peptide antigen via MHC class I	10	0.666667	0.000286441	HLA-DQB1, PDIA3, TAP2, TAP1, HLA-A, HLA-C, HLA-B, HLA-E, HLA-G, HLA-F	1286	30	16792	4.35251	0.720686	0.0330066	0.537081
GOTERM_BP_DIRECT	GO:0030217~T cell differentiation	10	0.666667	0.000286441	PTPRC, CD3D, LEPR, LCK, SOX4, PTPN22, KIT, IL7R, RUNX2, RHOH	1286	30	16792	4.35251	0.720686	0.0330066	0.537081
GOTERM_BP_DIRECT	GO:0055114~oxidation-reduction process	70	4.66667	0.000292346	C15ORF48, LDHB, ALDH1L1, CYP2C19, PDIA3, CYP2C18, BBOX1, CYP39A1, PTGIS, AKR1C4, CH25H, GPX3, MICAL1, LOXL4, ASPH, SRD5A2, SCD5, LOX, NQO1, SARDH, LOXL1, OXR1, KDM5D, ALDH6A1, CTBP2, PCBD2, CYP11A1, GMPR, ACADL, MOXD1, DHRS2, AKR1B10, CYBRD1, KDSR, STEAP1, AOC1, CYP1B1, SORD, HSD17B14, EGLN3, IFI30, GPD1L, FAM213A, DHODH, ALKBH7, MTHFD2L, PTGR1, PYROXD2, MAOA, FAM213B, P4HTM, MSRB3, IYD, ADI1, BL…	1286	592	16792	1.54397	0.727935	0.0328264	0.548124
GOTERM_BP_DIRECT	GO:0032496~response to lipopolysaccharide	27	1.8	0.000299585	CXCL1, ALPL, TNFRSF21, CXCL2, CXCL9, PTPN22, CXCL6, DCN, CXCL11, CXCL10, IRAK3, IL10RA, CASP8, FAS, CASP1, LOXL1, CD27, PTGER4, SPARC, UGT1A1, S100A14, LGALS9, IFNAR1, TNFRSF10A, CCR7, THBD, SELE	1286	164	16792	2.14972	0.736566	0.0327989	0.561661
GOTERM_CC_DIRECT	GO:0005856~cytoskeleton	48	3.2	0.000320118	GAS2L3, ENAH, MPZL2, CALD1, VIM, FERMT2, EPB41L4A, CDC42SE1, AKAP9, IGF2BP2, RDX, MYLIP, EPB41L4B, TPM1, TPM4, RAB3IP, DOCK2, GPHN, EZR, ANK2, FRMD8, CASP8, SNTB1, STK39, MTCL1, INPP5D, CYS1, CDC42EP5, ARHGDIB, TNIK, PTPN3, SWAP70, ARHGEF18, PTPN14, PTPN13, DPYSL2, NEXN, CTNNA3, EPB41L3, FNBP1, TNS1, CDC42SE2, SPAG4, EPB41L5, SGCE, JAK3, TGFB1I1, SGCB	1375	371	18224	1.71478	0.16521	0.00817439	0.467764
GOTERM_BP_DIRECT	GO:0014068~positive regulation of phosphatidylinositol 3-kinase signaling	15	1	0.000331205	PDGFA, HCLS1, IL18, F2RL1, KIT, GPER1, DCN, CCL5, SOX9, SIRT1, TGFB2, UNC5B, PDGFRA, SEMA4D, PDGFD	1286	65	16792	3.01328	0.771169	0.0353308	0.620768
GOTERM_MF_DIRECT	GO:0030247~polysaccharide binding	7	0.466667	0.000334338	ENPP1, PRG4, ENPP2, ENPP3, CLEC4G, SUSD2, AGL	1283	14	16881	6.57872	0.354063	0.0269461	0.544859
GOTERM_BP_DIRECT	GO:0051216~cartilage development	14	0.933333	0.000423842	EVC, SMAD9, LUM, CHI3L1, SOX9, TIMP1, HOXB3, BBS2, TYMS, SULF2, CD44, ITGB8, GNAS, BMP5	1286	59	16792	3.0984	0.848527	0.0439421	0.793741
GOTERM_BP_DIRECT	GO:0006952~defense response	15	1	0.00046027	RNASE6, CST3, CXCL9, IL32, HLA-B, PTPRCAP, CD74, CD48, CD84, GATA3, TAP1, HCP5, MX1, TPSAB1, MX2	1286	67	16792	2.92333	0.871213	0.0465469	0.861681
GOTERM_BP_DIRECT	GO:2000406~positive regulation of T cell migration	6	0.4	0.000473463	CCL20, CCL21, PYCARD, ITGA4, CCL5, CXCL10	1286	10	16792	7.83453	0.878563	0.0467873	0.886276
GOTERM_BP_DIRECT	GO:0001771~immunological synapse formation	6	0.4	0.000473463	NCK2, DOCK2, CORO1A, CCL21, CCL19, DOCK8	1286	10	16792	7.83453	0.878563	0.0467873	0.886276
GOTERM_BP_DIRECT	GO:0006508~proteolysis	60	4	0.000557237	IGHG1, IGLV1-44, PDIA3, CNDP1, MASP2, IGKV1-17, THOP1, MMP7, MMP2, C1QC, LNPEP, LPA, FAP, CASP8, CPA3, CASP1, TPSB2, CFD, LONRF2, F11, CAPNS1, CTSS, COLEC11, C1QA, C1QB, FOLH1, GZMK, CTSK, BACE2, MYRF, CTSD, CTSC, ADAMTS17, ERMP1, FOLH1B, ADAMTSL2, ADAMTSL3, MME, CTSA, STAMBPL1, FGL2, IGKC, PLAT, ADAM28, CAPN6, TMPRSS2, AGBL3, TRHDE, SCRN1, GGH, PAPLN, CAPN2, TMPRSS3, CBLB, TPSAB1, PRSS23, TBL1X,…	1286	500	16792	1.56691	0.916383	0.0536518	1.04232
GOTERM_CC_DIRECT	GO:0005788~endoplasmic reticulum lumen	29	1.93333	0.000573253	ARSD, PDIA3, PDGFA, COL3A1, ARSJ, BCHE, EOGT, RNASET2, COL27A1, COL6A3, COL6A2, PDGFD, COL8A1, SPON1, COL4A4, CES3, COL4A3, COL4A2, COL4A1, MZB1, COL15A1, COL5A2, COL5A1, GAS6, COL14A1, COL1A2, CTSC, COL1A1, LIPC	1375	192	18224	2.00188	0.276321	0.0139628	0.836204
GOTERM_BP_DIRECT	GO:0071356~cellular response to tumor necrosis factor	20	1.33333	0.000643387	PID1, TNFRSF21, NPNT, CHI3L1, CCL19, GPER1, CCL5, SIRT1, CCL15, BRCA1, CCL18, ZFP36L2, CYBA, CCL20, CCL21, GATA3, CD58, PYCARD, COL1A1, KLF2	1286	110	16792	2.3741	0.943033	0.0603885	1.20254
GOTERM_CC_DIRECT	GO:0001772~immunological synapse	10	0.666667	0.000714819	PRKCQ, CD37, CORO1A, EZR, LGALS3, CD3E, GZMA, LCK, CD53, RHOH	1375	34	18224	3.89818	0.33189	0.0166639	1.0417
GOTERM_CC_DIRECT	GO:0005923~bicellular tight junction	20	1.33333	0.000758289	MICALL2, RAP2B, CLDN7, F11R, CLMP, TGFBR1, CLDN10, MPP7, EPB41L4B, CLDN11, DDX58, EPCAM, CCND1, ANK3, MARVELD3, POF1B, JAM2, PMP22, AOC1, JAM3	1375	113	18224	2.34581	0.348083	0.0169679	1.10472
GOTERM_BP_DIRECT	GO:0030335~positive regulation of cell migration	28	1.86667	0.000804868	PDGFA, F2RL1, RDX, KIT, CCL5, TGFB1, DAB2, SEMA3G, ITGAV, FOXF1, ADRA2A, SEMA3C, PDGFD, ANGPTL3, GPNMB, LAMB1, TGFBR1, PODXL, VIL1, LEF1, GPER1, MCAM, CORO1A, ITGA6, F3, PDGFRA, COL1A1, SEMA4D	1286	184	16792	1.98702	0.972255	0.0734345	1.5022
GOTERM_BP_DIRECT	GO:0001775~cell activation	6	0.4	0.000813397	PDGFA, CD59, PDGFRA, CST3, CD24, TIMP1	1286	11	16792	7.1223	0.97329	0.0726955	1.51801
GOTERM_BP_DIRECT	GO:0051603~proteolysis involved in cellular protein catabolic process	12	0.8	0.000814891	SCPEP1, CTSK, GZMA, FAP, CASP8, CTSA, CTSC, CTSS, CAPN2, CPVL, PSMB8, PSMB9	1286	48	16792	3.26439	0.973467	0.0713922	1.52077
GOTERM_BP_DIRECT	GO:0010951~negative regulation of endopeptidase activity	21	1.4	0.000837468	C3P1, COL4A3, A2M, PZP, BST2, LXN, SPINT1, PAPLN, TIMP2, TIMP1, SERPINB9, LPA, SERPINE2, CARD16, SPINT2, ITIH1, COL6A3, TFPI, ITIH5, CSTA, CRIM1	1286	121	16792	2.26619	0.976006	0.0718848	1.56259
KEGG_PATHWAY	hsa05310:Asthma	10	0.666667	0.000865929	HLA-DQB1, HLA-DRB1, HLA-DPA1, HLA-DPB1, HLA-DMB, HLA-DOA, HLA-DMA, HLA-DOB, HLA-DQA1, HLA-DRA	617	30	6910	3.73312	0.212664	0.00881645	1.13641
GOTERM_BP_DIRECT	GO:0050680~negative regulation of epithelial cell proliferation	13	0.866667	0.000909436	FGFR2, AR, RB1, SOX9, TGFB1, PBLD, TGFB2, CDKN1C, GPC3, MARVELD3, TGFBR3, MCC, RUNX3	1286	56	16792	3.03122	0.982589	0.0763522	1.69579
GOTERM_MF_DIRECT	GO:0008009~chemokine activity	12	0.8	0.000919582	CXCL1, CCL20, CCL21, CXCL2, CXCL9, CCL19, CXCL6, CCL5, CXCL11, CCL15, CCL18, CXCL10	1283	49	16881	3.22223	0.699542	0.0682886	1.49191
GOTERM_BP_DIRECT	GO:0090023~positive regulation of neutrophil chemotaxis	8	0.533333	0.000925677	CXCL1, CCR7, RAC2, CCL21, CXCL2, NCKAP1L, CCL19, CD74	1286	22	16792	4.7482	0.983805	0.076227	1.72583
GOTERM_BP_DIRECT	GO:0001558~regulation of cell growth	16	1.06667	0.000975065	FXYD2, TMEM97, IGFBP7, IGFBP6, CLSTN1, RB1, CHPT1, PRKCQ, EPB41L3, WISP1, CTGF, FBLN5, H2AFY, ITCH, CRIM1, CEACAM1	1286	80	16792	2.61151	0.987004	0.0786778	1.81711
GOTERM_CC_DIRECT	GO:0005884~actin filament	14	0.933333	0.000978936	MYO5A, AKAP13, PALLD, TPM2, TPM1, IQGAP1, FLNA, TPM4, CORO1A, EZR, RAC2, WIPF3, WIPF1, RCSD1	1375	65	18224	2.85467	0.424428	0.0210217	1.42403
GOTERM_BP_DIRECT	GO:0072643~interferon-gamma secretion	5	0.333333	0.000989826	BTN3A1, VTCN1, GATA3, F2RL1, BTN3A2	1286	7	16792	9.32682	0.987831	0.0784019	1.84438
GOTERM_BP_DIRECT	GO:0008285~negative regulation of cell proliferation	49	3.26667	0.000996086	CXCL1, CYP1B1, RARRES1, IFITM1, IGFBP7, PPP2R5C, IGFBP6, SOX4, TIMP2, TGFB1, TGFB2, LIF, SERPINE2, BCHE, BCL11B, GATA3, NDRG1, GPNMB, DPT, COL4A3, AR, TESC, CTBP2, MAP2K1, KLF11, S100A11, PTPN14, DLL1, RB1, GPER1, FRZB, STK4, SFRP5, IFIT3, RERG, ATF5, NCK2, VEGFC, DHRS2, CDKN1A, SSTR1, ETS1, TGFB1I1, PMP22, EMP3, LDOC1, PDCD5, EIF2AK2, BMP5	1286	396	16792	1.61571	0.988166	0.0775008	1.85594
GOTERM_BP_DIRECT	GO:0048565~digestive tract development	10	0.666667	0.000998402	FGFR2, CLMP, ITGA6, FOXF1, GATA3, COL3A1, RB1, KIT, LGR4, TGFB1	1286	35	16792	3.73073	0.988288	0.0763413	1.86021
GOTERM_CC_DIRECT	GO:0001726~ruffle	17	1.13333	0.00104432	MYO5A, S100A6, TESC, TLN2, TRPM7, PODXL, VIL1, S100A11, RDX, PALLD, IQGAP1, ANXA2, MYO10, EZR, GNAS, WIPF1, FGD4	1375	90	18224	2.5035	0.445286	0.0215896	1.51847
GOTERM_MF_DIRECT	GO:0003779~actin binding	37	2.46667	0.00115487	S100A4, GAS2L3, ALDOA, MYO5A, ENAH, TLN2, IMPACT, CALD1, IQGAP2, RDX, TPM2, TPM1, EZR, CXCR4, GSN, SNTB1, MICAL1, WIPF1, ACTR3C, CEACAM1, FGD4, FMNL2, CAP2, TRPM7, HCLS1, MYH4, SYNPO2, PALLD, EPB41L3, MYRIP, CORO1A, TNS1, CCR5, TAGLN, CAPG, POF1B, GBP1	1283	278	16881	1.75117	0.779153	0.0804811	1.87026
GOTERM_BP_DIRECT	GO:0031589~cell-substrate adhesion	7	0.466667	0.0011762	VWF, CORO1A, ITGA6, ITGAV, ITGA2, GAS6, PRKX	1286	17	16792	5.37664	0.994697	0.0878233	2.18803
GOTERM_MF_DIRECT	GO:0048306~calcium-dependent protein binding	13	0.866667	0.00118002	S100A4, A2M, S100A6, STMN2, MASP2, S100A11, ANXA1, ANXA4, ANXA3, ANXA2, CLEC4M, ANXA11, SNAP25	1283	58	16881	2.94908	0.786304	0.0780102	1.91063
KEGG_PATHWAY	hsa05321:Inflammatory bowel disease (IBD)	15	1	0.00123848	HLA-DQB1, HLA-DRB1, IL18, HLA-DMB, STAT1, HLA-DMA, TGFB1, HLA-DQA1, TGFB2, IL2RG, HLA-DPA1, HLA-DPB1, HLA-DOA, HLA-DOB, HLA-DRA	617	64	6910	2.62485	0.289676	0.0121412	1.62165
GOTERM_BP_DIRECT	GO:0030334~regulation of cell migration	15	1	0.00129836	ENPP2, DPYSL3, JAG1, NEXN, FLNA, TGFB1, PRKX, THY1, DDX58, LAMA2, SERPINE2, CXCR4, PECAM1, DOCK10, CEACAM1	1286	74	16792	2.6468	0.996924	0.0949136	2.41266
GOTERM_CC_DIRECT	GO:0030670~phagocytic vesicle membrane	13	0.866667	0.00129935	CYBA, RAB31, CORO1A, RAB8B, RAC2, HLA-A, HLA-C, HLA-B, HLA-E, RAB11FIP1, HLA-G, ANXA3, HLA-F	1375	59	18224	2.92033	0.519684	0.0258497	1.88601
GOTERM_BP_DIRECT	GO:0032355~response to estradiol	17	1.13333	0.00137531	TXNIP, CRYAB, ANXA1, ESR1, CST3, TGFB1, IFI27, CCND1, CTGF, ETS1, CASP8, TFPI, COL1A1, NQO1, NR2F2, GSTP1, GHR	1286	91	16792	2.43932	0.997817	0.0986387	2.55391
GOTERM_MF_DIRECT	GO:0005102~receptor binding	44	2.93333	0.00141591	CXCL1, NRTN, A2M, VTCN1, F2RL1, IGFBP6, AKAP9, FKBP1B, CXCL10, TGFB2, LIF, SERPINE2, ITGB8, APOF, CD2, LGI1, LTB, TYROBP, PLAT, FYB, ITK, AR, PTPRD, RAB8B, ICAM3, ANXA1, HLA-A, HLA-B, HLA-E, CCL15, GAS6, HLA-G, HLA-F, LAMA2, APOL2, CD86, TNFSF13B, TENM2, CD58, HAO2, GFRA1, JAK3, SEMA4D, CD200	1283	353	16881	1.64002	0.843063	0.0884378	2.28843
GOTERM_BP_DIRECT	GO:0071407~cellular response to organic cyclic compound	13	0.866667	0.00147398	KLF5, ALPL, CYBA, TMEM173, SMAD9, CYP1B1, ITGA6, IL18, FOXF1, CASP8, CCL5, STAT1, TGFB1	1286	59	16792	2.87709	0.998594	0.103673	2.73473
GOTERM_CC_DIRECT	GO:0042101~T cell receptor complex	7	0.466667	0.00152926	CD3D, CD8A, CD3E, CD247, TRAT1, CEACAM1, SYK	1375	18	18224	5.15426	0.578174	0.0293256	2.21626
GOTERM_BP_DIRECT	GO:0070371~ERK1 and ERK2 cascade	8	0.533333	0.00164091	ZFP36L2, PTGER4, MAP2K1, ITGAV, IQGAP3, HTR2B, SOX9, LGALS9	1286	24	16792	4.35251	0.999332	0.112954	3.03996
GOTERM_MF_DIRECT	GO:0001730~2'-5'-oligoadenylate synthetase activity	4	0.266667	0.00164884	OASL, OAS3, OAS1, OAS2	1283	4	16881	13.1574	0.884306	0.097607	2.66015
GOTERM_BP_DIRECT	GO:0006796~phosphate-containing compound metabolic process	7	0.466667	0.00165098	PTPRD, ENPP1, ENPP2, ENPP3, SLC17A2, INPP5D, TGFB1	1286	18	16792	5.07793	0.999361	0.111881	3.05833
GOTERM_BP_DIRECT	GO:0051289~protein homotetramerization	13	0.866667	0.00171654	ALDOA, SHMT2, GBP5, TRPM8, PCBD2, MAT1A, RXRA, GLS, GPX3, SAMHD1, GNMT, ACACB, ACADL	1286	60	16792	2.82913	0.999523	0.114326	3.17793
GOTERM_BP_DIRECT	GO:0007596~blood coagulation	27	1.8	0.00173462	F2RL1, LMAN1, F13B, ANXA8, PROCR, SERPINE2, GATA6, GATA3, PDGFD, ENTPD1, DOCK11, PAPSS2, PLAT, F11, MAFF, DOCK9, ITGA2, DOCK8, ANXA5, P2RX5, VWF, THBD, F3, CD59, COL1A2, TFPI, COL1A1	1286	184	16792	1.91605	0.99956	0.113761	3.21088
GOTERM_BP_DIRECT	GO:0009636~response to toxic substance	16	1.06667	0.00184519	CYP1B1, CST3, TTPA, CDH1, CCL5, INMT, DHRS2, TYMS, CDKN1A, NUPR1, BCL2, MDM2, FAS, EIF2AK2, NQO1, GSTP1	1286	85	16792	2.45789	0.999731	0.118824	3.41221
GOTERM_BP_DIRECT	GO:0042127~regulation of cell proliferation	27	1.8	0.00187512	TNFRSF21, FXYD2, CXCL2, CXCL9, EGLN3, JAG1, KIT, CXCL6, SOX9, CXCL11, CXCL10, CHST11, NDRG1, FAS, CD27, TXNIP, ITK, TRNP1, MZB1, ANXA1, S100A11, SIRT1, BRCA1, TNFRSF10A, LCK, ACE2, CFDP1	1286	185	16792	1.9057	0.999765	0.118918	3.46665
GOTERM_CC_DIRECT	GO:0048471~perinuclear region of cytoplasm	68	4.53333	0.00189287	S100A4, S100A6, WWC1, PTPN22, LNPEP, TMEM173, DAB1, CTGF, TMEM100, MX1, PTPRM, TNIK, STMN2, CST3, HERC5, ACKR3, GPER1, FLNA, MYRIP, KRT18, TNFSF13B, DGAT2, PTGDS, CCR2, VAMP5, SORT1, GNAS, EIF2AK2, GBP4, GBP3, GBP2, PLA2G5, GALNT3, PKHD1, ENPP3, AKAP13, PLVAP, CDH1, OAS2, LPXN, EZR, FAT1, NDRG1, LAMB1, SNAP25, MT1H, MT1G, EHD4, MT1F, SPP1, CAPN6, RAB8B, RASEF, CHI3L1, ITGA2, STAT1, S100A14, ANXA4…	1375	621	18224	1.4513	0.656508	0.0349928	2.73644
GOTERM_MF_DIRECT	GO:0044548~S100 protein binding	6	0.4	0.00192385	S100A6, EZR, ANXA11, S100A11, IQGAP1, ANXA2	1283	13	16881	6.07267	0.91929	0.108102	3.09732
KEGG_PATHWAY	hsa04062:Chemokine signaling pathway	30	2	0.00195228	CXCL1, ADCY1, ADCY7, CXCL2, CXCL9, CXCL6, CXCL11, CCL5, CXCL10, DOCK2, RAC2, CCL20, CXCR4, CCL21, SOS1, CXCR6, PIK3R3, PIK3CG, ITK, MAP2K1, CCL19, STAT1, CCL15, CCL18, STAT2, CCR7, CCR5, CCR2, JAK3, GRK5	617	186	6910	1.80635	0.416877	0.0184266	2.54521
GOTERM_BP_DIRECT	GO:0031274~positive regulation of pseudopodium assembly	6	0.4	0.00199053	CCR7, CCL21, F2RL1, KIT, CDC42EP3, CDC42EP5	1286	13	16792	6.02656	0.99986	0.124008	3.67624
GOTERM_CC_DIRECT	GO:0030027~lamellipodium	24	1.6	0.00206391	ENAH, TESC, PTPRM, SWAP70, STMN2, PODXL, VIL1, PTPN13, IQGAP2, NEDD9, CDH1, RDX, DPYSL3, PALLD, CTNNA3, RAB3IP, CORO1A, MYO10, RAC2, FAP, FAT1, MCC, ANGPTL3, FGD4	1375	160	18224	1.98807	0.688154	0.0368909	2.98023
GOTERM_BP_DIRECT	GO:0070372~regulation of ERK1 and ERK2 cascade	8	0.533333	0.00213031	FGFR2, PKHD1, RASGRP1, STYX, TGFBR3, CEACAM1, GSTP1, SYK	1286	25	16792	4.17841	0.999925	0.130313	3.92954
GOTERM_BP_DIRECT	GO:0008152~metabolic process	25	1.66667	0.00220551	ENPP5, BCAT1, ARSD, ARSJ, ECHDC2, ACAT1, DIP2C, OXCT1, UGT2A1, UGT2A3, ACSL4, ACSM2B, NCEH1, MAN1A2, ACSM2A, NAT2, LYZ, UGT1A1, ACSM3, DBT, SULF2, CPE, CENPV, PLA2G4C, GSTP1	1286	168	16792	1.94309	0.999946	0.132778	4.06554
KEGG_PATHWAY	hsa05340:Primary immunodeficiency	10	0.666667	0.00229804	PTPRC, CD3D, CD8A, CD3E, RFX5, TAP2, LCK, TAP1, IL2RG, IL7R	617	34	6910	3.29393	0.470059	0.0209439	2.98969
GOTERM_CC_DIRECT	GO:0031093~platelet alpha granule lumen	12	0.8	0.00234983	ALDOA, VEGFC, VWF, A2M, ALB, PDGFA, SPARC, CFD, TGFB1, GAS6, TGFB2, TIMP1	1375	55	18224	2.89174	0.734692	0.0406166	3.3865
GOTERM_BP_DIRECT	GO:0008284~positive regulation of cell proliferation	54	3.6	0.00236251	CLDN7, E2F3, PDGFA, NAP1L1, TGFB1, TGFB2, CXCL10, EPCAM, CD47, CTGF, RAB25, PDGFD, TRPM4, AR, CAPNS1, CST3, LEF1, DLL1, GPER1, FGF21, VEGFC, CD86, TNFSF13B, CCND2, HIPK2, PDGFRA, MDM2, FGFR2, PKHD1, SOX4, KIT, SOX9, TSPYL5, TIMP1, LIF, RAC2, BCL2, ITGAV, ADRA2A, RUNX2, KLF5, SHMT2, CRIP2, TGFBR1, HCLS1, MZB1, SIRT1, ETS1, AVPR1A, ID4, PBX1, GRK5, HTR2B, MAB21L2	1286	466	16792	1.51311	0.999973	0.139665	4.34891
GOTERM_CC_DIRECT	GO:0005911~cell-cell junction	25	1.66667	0.00250212	MICALL2, ITK, FLRT2, F11R, PTPRM, TLN2, THEMIS, CD3E, IQGAP3, CD53, KIT, AQP3, IQGAP1, FLNA, ANXA2, EPB41L3, CORO1A, TENM2, FAT1, KRT8, CD2, HEG1, STEAP1, CEACAM1, LCP2	1375	172	18224	1.92643	0.75658	0.0419134	3.60225
GOTERM_MF_DIRECT	GO:0016491~oxidoreductase activity	28	1.86667	0.00250362	SORD, ALDH1L1, CYP2C19, HSD17B14, EGLN3, ADH6, SLC9B2, MICAL1, SCD5, SARDH, OXR1, PTGR1, PYROXD2, MAOA, IYD, ADI1, BLVRA, DHRS2, HSDL2, HAO2, AKR1B1, AOX1, HEPH, KDSR, STEAP1, HPGD, RDH13, CRYZL1	1283	200	16881	1.84204	0.962233	0.132768	4.01292
GOTERM_BP_DIRECT	GO:0042110~T cell activation	11	0.733333	0.00252329	PIK3CG, CD48, ITK, NCK2, CD86, NLRC3, CD8A, CD3E, CASP8, CD2, IFNAR1	1286	47	16792	3.05602	0.999987	0.146509	4.63826
KEGG_PATHWAY	hsa04976:Bile secretion	15	1	0.00263967	FXYD2, ADCY1, NCEH1, ADCY7, RXRA, CFTR, ABCB1, AQP1, ABCG2, SLCO1A2, KCNN2, ABCC4, GNAS, SLC51B, SLC51A	617	69	6910	2.43464	0.517856	0.0232579	3.42702
GOTERM_MF_DIRECT	GO:0005044~scavenger receptor activity	11	0.733333	0.00281246	TMPRSS2, LGALS3BP, ENPP1, PRG4, ENPP2, ENPP3, SUSD2, ACKR3, LOXL4, TMPRSS3, CD163	1283	48	16881	3.01525	0.974804	0.142194	4.49734
GOTERM_BP_DIRECT	GO:0070555~response to interleukin-1	9	0.6	0.00283632	CYBA, IRAK3, HNMT, ETS1, ANXA1, CHI3L1, SELE, LGALS9, GHR	1286	33	16792	3.56115	0.999997	0.16107	5.19925
GOTERM_BP_DIRECT	GO:0045579~positive regulation of B cell differentiation	6	0.4	0.00290275	NCKAP1L, PRDM1, INPP5D, ATP11C, CD27, SYK	1286	14	16792	5.59609	0.999998	0.162459	5.31789
KEGG_PATHWAY	hsa05205:Proteoglycans in cancer	31	2.06667	0.00301401	LUM, RDX, DCN, MMP2, TGFB1, IQGAP1, TGFB2, GPC3, EZR, CD44, ANK2, ANK3, SOS1, ITGAV, FAS, PIK3R3, PIK3CG, MAP2K1, HCLS1, MET, ESR1, ITGA2, PPP1CB, FZD7, FLNA, PRKCB, CCND1, CDKN1A, CBLB, MAPK13, MDM2	617	200	6910	1.7359	0.56531	0.0256991	3.90413
GOTERM_BP_DIRECT	GO:0042476~odontogenesis	8	0.533333	0.00343954	FGFR2, MYO5A, COL1A2, ID3, AQP1, LAMB1, AQP3, TGFB2	1286	27	16792	3.8689	1	0.187214	6.2715
GOTERM_BP_DIRECT	GO:0015721~bile acid and bile salt transport	8	0.533333	0.00343954	SLCO1A2, AKR1C4, NCOA2, ALB, RXRA, SLC51B, SLC51A, CEACAM1	1286	27	16792	3.8689	1	0.187214	6.2715
GOTERM_BP_DIRECT	GO:0001837~epithelial to mesenchymal transition	9	0.6	0.00346442	FGFR2, S100A4, TGFBR1, EPB41L5, TGFBR3, LEF1, SOX9, TGFB1, TGFB2	1286	34	16792	3.45641	1	0.186171	6.31549
KEGG_PATHWAY	hsa05218:Melanoma	15	1	0.00348134	PIK3CG, E2F3, MAP2K1, PDGFA, MITF, MET, CDH1, RB1, FGF21, CDKN1A, CCND1, PDGFRA, MDM2, PDGFD, PIK3R3	617	71	6910	2.36606	0.618073	0.0287462	4.49671
GOTERM_BP_DIRECT	GO:0071560~cellular response to transforming growth factor beta stimulus	11	0.733333	0.00348406	ZFP36L2, COL4A2, TGFBR1, EPB41L5, FBN1, SOX5, PDGFD, COL1A1, PDCD5, SOX9, TGFB1	1286	49	16792	2.93129	1	0.184904	6.35018
KEGG_PATHWAY	hsa05152:Tuberculosis	28	1.86667	0.00376588	HLA-DQB1, HLA-DRB1, IL18, ITGB2, HLA-DMB, HLA-DMA, ITGAM, TGFB1, CD74, TGFB2, IL10RA, BCL2, CASP8, HLA-DPB1, HLA-DOA, HLA-DOB, SYK, RFX5, CTSS, STAT1, HLA-DQA1, CLEC4M, LAMP1, CORO1A, MAPK13, CTSD, HLA-DPA1, HLA-DRA	617	177	6910	1.77165	0.64702	0.0301635	4.85584
GOTERM_MF_DIRECT	GO:0002020~protease binding	17	1.13333	0.00382016	A2M, CST3, KIT, TIMP2, TTN, ANXA2, TIMP1, TNFRSF10A, SERPINB9, VWF, ITGAV, F3, BCL2, FAP, CCBE1, PYCARD, CSTA	1283	101	16881	2.21462	0.993279	0.181352	6.062
GOTERM_BP_DIRECT	GO:0060348~bone development	10	0.666667	0.00388595	FGFR2, SMAD9, PTGER4, SULF2, AKAP13, GNAS, SRD5A2, SPARC, PAPSS2, CHAD	1286	42	16792	3.10894	1	0.201577	7.05761
GOTERM_BP_DIRECT	GO:0007566~embryo implantation	10	0.666667	0.00388595	LIF, RECK, BSG, PTGIS, RXRA, IGFBP7, CST3, PCSK5, MMP2, SPP1	1286	42	16792	3.10894	1	0.201577	7.05761
GOTERM_BP_DIRECT	GO:0002503~peptide antigen assembly with MHC class II protein complex	4	0.266667	0.00397508	HLA-DRB1, HLA-DMB, HLA-DMA, HLA-DRA	1286	5	16792	10.446	1	0.203348	7.21381
GOTERM_BP_DIRECT	GO:0042270~protection from natural killer cell mediated cytotoxicity	4	0.266667	0.00397508	SERPINB9, HLA-A, HLA-B, HLA-E	1286	5	16792	10.446	1	0.203348	7.21381
GOTERM_BP_DIRECT	GO:0097029~mature conventional dendritic cell differentiation	4	0.266667	0.00397508	CCR7, F2RL1, CCL19, LGALS9	1286	5	16792	10.446	1	0.203348	7.21381
GOTERM_BP_DIRECT	GO:0019886~antigen processing and presentation of exogenous peptide antigen via MHC class II	16	1.06667	0.00407181	HLA-DQB1, KIF22, HLA-DRB1, IFI30, CTSS, HLA-DMB, RACGAP1, HLA-DMA, CD74, HLA-DQA1, CTSD, HLA-DPA1, HLA-DPB1, HLA-DOA, HLA-DOB, HLA-DRA	1286	92	16792	2.27088	1	0.205413	7.38306
GOTERM_BP_DIRECT	GO:0007179~transforming growth factor beta receptor signaling pathway	16	1.06667	0.00407181	F11R, SMAD9, FUT8, LTBP2, USP9Y, TGFBR1, ARHGEF18, COL3A1, FERMT2, TGFB1, TGFB2, HIPK2, COL1A2, TGFBR3, GDF15, HPGD	1286	92	16792	2.27088	1	0.205413	7.38306
GOTERM_BP_DIRECT	GO:0022408~negative regulation of cell-cell adhesion	6	0.4	0.00408242	SPINT2, PODXL, EPB41L5, LEF1, CDH1, TGFB1	1286	15	16792	5.22302	1	0.203599	7.40161
GOTERM_BP_DIRECT	GO:0042993~positive regulation of transcription factor import into nucleus	6	0.4	0.00408242	DDX58, TMEM173, HCLS1, PTPN22, CDH1, FLNA	1286	15	16792	5.22302	1	0.203599	7.40161
GOTERM_BP_DIRECT	GO:0006911~phagocytosis, engulfment	9	0.6	0.0041951	IGHG1, GULP1, GSN, IGHD, IGHA1, IGKC, IGHM, IGLL5, IGLC1	1286	35	16792	3.35765	1	0.206308	7.59835
KEGG_PATHWAY	hsa05215:Prostate cancer	17	1.13333	0.00434364	FGFR2, PIK3CG, AR, E2F3, MAP2K1, PDGFA, LEF1, RB1, CDKN1A, CCND1, BCL2, SOS1, PDGFRA, MDM2, SRD5A2, PDGFD, PIK3R3	617	88	6910	2.16351	0.699244	0.0337448	5.58125
GOTERM_MF_DIRECT	GO:0003823~antigen binding	17	1.13333	0.0046526	IGHG1, MICB, IGLV1-44, IGKV1-17, HLA-C, ITGA4, HLA-B, IGHM, IL7R, HLA-G, TGFB1, CD48, IGHD, IGHA1, IGKC, IGLC1, IGLL5	1283	103	16881	2.17162	0.997746	0.208977	7.33634
GOTERM_BP_DIRECT	GO:0035455~response to interferon-alpha	5	0.333333	0.00492683	LAMP3, BST2, IFITM1, EIF2AK2, MX2	1286	10	16792	6.52877	1	0.235208	8.86638
GOTERM_BP_DIRECT	GO:0002576~platelet degranulation	17	1.13333	0.00500476	ALDOA, A2M, PDGFA, SPARC, TTN, GAS6, FLNA, TGFB1, TIMP1, TGFB2, VWF, VEGFC, LGALS3BP, ALB, PECAM1, ABCC4, CFD	1286	103	16792	2.15513	1	0.23595	9.00046
GOTERM_CC_DIRECT	GO:0072562~blood microparticle	22	1.46667	0.0050502	IGHG1, A2M, PZP, IGKV1-17, IGHM, C1QC, HPR, TGFB1, C8A, C1QB, LGALS3BP, CFHR3, HSPA2, ALB, GSN, ITIH1, BCHE, IGHD, IGHA1, IGKC, IGLL5, IGLC1	1375	152	18224	1.91832	0.942475	0.080556	7.14613
GOTERM_MF_DIRECT	GO:0042626~ATPase activity, coupled to transmembrane movement of substances	10	0.666667	0.00512278	ABCC9, TAP2, TAP1, ABCC4, ABCC1, ABCB1, CFTR, ABCA6, ABCA5, ABCG2	1283	44	16881	2.99033	0.998785	0.220122	8.04892
KEGG_PATHWAY	hsa04611:Platelet activation	22	1.46667	0.00515774	PIK3CG, ADCY1, ADCY7, TLN2, COL3A1, ITGA2, ARHGAP35, PPP1CB, COL5A2, COL5A1, VWF, MAPK13, RASGRP1, COL27A1, COL1A2, GUCY1A3, GNAS, COL1A1, PIK3R3, PLA2G4C, SYK, LCP2	617	130	6910	1.89527	0.760025	0.0388694	6.5947
GOTERM_CC_DIRECT	GO:0016010~dystrophin-associated glycoprotein complex	6	0.4	0.00522697	KRT19, KRT8, SNTB1, SGCE, SSPN, SGCB	1375	16	18224	4.97018	0.94796	0.0809822	7.38743
GOTERM_MF_DIRECT	GO:0008191~metalloendopeptidase inhibitor activity	6	0.4	0.00538982	RECK, COL4A3, BST2, LXN, TIMP2, TIMP1	1283	16	16881	4.93404	0.999144	0.222965	8.45135
GOTERM_BP_DIRECT	GO:0034097~response to cytokine	11	0.733333	0.00544555	TYMS, IFI27, GNAO1, SP100, BCL2, COL3A1, SPARC, TIMP2, STAT1, PLA2G5, TIMP1	1286	52	16792	2.76217	1	0.25129	9.75529
GOTERM_BP_DIRECT	GO:0006633~fatty acid biosynthetic process	11	0.733333	0.00544555	ACSM2B, ACSM3, CH25H, ACSM2A, ACLY, ELOVL7, PRKAA2, SCD5, ACACB, LIPC, BRCA1	1286	52	16792	2.76217	1	0.25129	9.75529
GOTERM_CC_DIRECT	GO:0016021~integral component of membrane	432	28.8	0.00547819	C15ORF48, SLC9A7, VTCN1, PPP2R5C, IGHM, ACBD5, TMEM140, CLPTM1L, MALL, CH25H, FAP, SLC9B2, VNN1, FAS, BSG, PTPRM, AIG1, LHFP, PIK3IP1, HLA-DQA1, EBPL, TMEM139, IGHD, F3, BACE2, SPAG4, HLA-DPA1, YME1L1, PMP22, HLA-DRA, RTP4, CYP1B1, HLA-DRB1, CCDC167, KCNJ3, FAM19A5, HLA-DPB1, HLA-DOA, HLA-DOB, SLC28A1, TMEM120A, MAOA, TGFBR1, CCDC80, ATP11A, ATP11C, GAS1, APOL2, CLGN, FAM151A, AVPR1A, TGFBR3, SMU…	1375	5163	18224	1.10898	0.954869	0.0824617	7.72934
GOTERM_BP_DIRECT	GO:0006928~movement of cell or subcellular component	15	1	0.00549119	MAP2K1, ENPP2, CALD1, VIM, CHST4, FPR3, MYLIP, TPM1, TPM4, ARPC1B, CORO1A, SPINT2, ADRA2A, VNN1, ARHGDIB	1286	86	16792	2.27748	1	0.25054	9.8331
GOTERM_BP_DIRECT	GO:0043123~positive regulation of I-kappaB kinase/NF-kappaB signaling	23	1.53333	0.00564871	S100A4, ZC3HAV1, BST2, F2RL1, CCL19, AKAP13, GPRC5B, TRIM22, LGALS9, FLNA, PRKCB, APOL3, TRIM38, TRIM5, CCR7, CCL21, ZDHHC13, CASP8, SHISA5, TNFRSF19, HTR2B, CASP1, TRAF5	1286	161	16792	1.86536	1	0.254163	10.1012
GOTERM_CC_DIRECT	GO:0016328~lateral plasma membrane	11	0.733333	0.00565365	EPCAM, CLDN7, TACSTD2, ANK3, ANXA1, IQGAP3, CDH1, AKAP7, MTCL1, IQGAP1, CEACAM1	1375	53	18224	2.75079	0.959144	0.0827952	7.96745
GOTERM_BP_DIRECT	GO:0043154~negative regulation of cysteine-type endopeptidase activity involved in apoptotic process	13	0.866667	0.0057308	SERPINB9, LAMP3, CD44, CRYAB, TNFAIP8, VIL1, LEF1, MDM2, MICAL1, AQP1, CD27, GAS6, IFI6	1286	69	16792	2.46012	1	0.2548	10.2406
GOTERM_BP_DIRECT	GO:0010628~positive regulation of gene expression	33	2.2	0.00580085	VIM, MITF, IQGAP3, PTPN22, RDX, EPB41L4B, KIT, IL7R, TGFB1, TGFB2, EZR, ANK2, ANK3, ITGB8, CTGF, GSN, PID1, AR, TESC, MAP2K1, CD3E, TGFBR1, LEF1, GPER1, BRCA1, GAS6, LGALS9, DDX58, SERPINB9, LAMP3, MDM2, PRDM1, PDCD5	1286	262	16792	1.64465	1	0.254965	10.3594
GOTERM_BP_DIRECT	GO:0014066~regulation of phosphatidylinositol 3-kinase signaling	14	0.933333	0.00597841	FGFR2, IER3, PDGFA, PPP2R5C, PTPN13, KIT, TRAT1, CD86, C3ORF58, RASGRP1, LCK, PDGFRA, PIP4K2A, CEACAM1	1286	78	16792	2.34366	1	0.259147	10.6599
GOTERM_BP_DIRECT	GO:0007162~negative regulation of cell adhesion	9	0.6	0.00600641	CLDN7, LPXN, DAB1, PODXL, TGFBI, SEMA4D, JAM2, ADAMDEC1, ARHGDIB	1286	37	16792	3.17616	1	0.257708	10.7072
GOTERM_BP_DIRECT	GO:0051091~positive regulation of sequence-specific DNA binding transcription factor activity	17	1.13333	0.00604678	SP100, ARID5B, ESR1, BEX1, TRIM15, KIT, TRIM22, TRIM21, ANXA3, DDX58, TRIM38, TRIM5, TRIM31, HIPK2, PYCARD, TRAF5, SMARCA4	1286	105	16792	2.11408	1	0.256752	10.7753
GOTERM_MF_DIRECT	GO:0004252~serine-type endopeptidase activity	32	2.13333	0.00628896	IGHG1, IGLV1-44, MASP2, IGKV1-17, MMP7, C1QC, MMP2, LPA, FAP, IGKC, CFD, TPSB2, PCSK5, F11, PLAT, TMPRSS2, GZMA, COLEC11, CTSS, HPR, TMPRSS3, IMMP1L, C1QA, C1QB, CTSK, GZMK, F3, CTSD, CTSC, PRSS23, TPSAB1, IGLC1	1283	255	16881	1.65113	0.999738	0.247483	9.79421
GOTERM_BP_DIRECT	GO:0032480~negative regulation of type I interferon production	8	0.533333	0.00644741	DDX58, NLRC5, IFIH1, ISG15, HERC5, UBE2L6, ITCH, RNF135	1286	30	16792	3.48201	1	0.268757	11.4489
GOTERM_BP_DIRECT	GO:0045662~negative regulation of myoblast differentiation	7	0.466667	0.00645299	IL18, DLL1, ID3, MBNL3, SOX9, TGFB1, CXCL10	1286	23	16792	3.97403	1	0.266488	11.4583
GOTERM_CC_DIRECT	GO:0030175~filopodium	13	0.866667	0.0064531	PPP1R9A, ENAH, EZR, ITGA6, FAT1, PODXL, TENM2, VIL1, IQGAP2, RDX, ARL4C, CD302, FGD4	1375	71	18224	2.42676	0.974044	0.0916159	9.04509
GOTERM_CC_DIRECT	GO:0005764~lysosome	29	1.93333	0.0064547	MYO5A, C9ORF72, ARSD, ZC3HAV1, IFI30, CTSA, PPT1, RRAGD, ABCA5, LAPTM5, CXCR4, ANK3, RNASET2, HLA-DOB, CTBS, TMEM97, GGH, CST3, CTSS, CAPN2, IFNAR1, LAMP1, CTSK, FNBP1, AKR1B10, CTSD, CTSC, NEU4, HLA-DRA	1375	226	18224	1.70071	0.974067	0.0893963	9.04724
GOTERM_CC_DIRECT	GO:0030658~transport vesicle membrane	9	0.6	0.00651491	HLA-DQB1, CPE, HLA-DRB1, HLA-DPA1, HLA-DPB1, CEACAM1, CD74, HLA-DQA1, HLA-DRA	1375	38	18224	3.13906	0.974939	0.0880414	9.12792
GOTERM_BP_DIRECT	GO:0007267~cell-cell signaling	32	2.13333	0.00661488	FGFR2, PDGFA, IL18, CXCL9, ITGB2, CXCL6, CCL5, CXCL11, TGFB2, CXCL10, LNPEP, SH2D1A, WISP1, CCL20, CTGF, CCL21, FAT1, SRD5A2, LTB, PCSK5, AR, TRHDE, BST2, CHST4, FGF21, CCL15, CCL18, C1QA, CD86, CCR5, SSTR1, GDF15	1286	254	16792	1.64504	1	0.269724	11.7291
KEGG_PATHWAY	hsa04810:Regulation of actin cytoskeleton	31	2.06667	0.0066535	FGFR2, ENAH, PDGFA, IQGAP3, IQGAP2, ARHGAP35, ITGB2, RDX, IQGAP1, ITGAM, MYL9, EZR, RAC2, ITGB8, GSN, SOS1, ITGAV, PDGFD, PIK3R3, PIK3CG, MAP2K1, NCKAP1L, ITGA2, ITGA4, FGF21, PPP1CB, ARPC1B, ITGA6, CFL2, PDGFRA, PIP4K2A	617	211	6910	1.6454	0.84158	0.0485778	8.4306
KEGG_PATHWAY	hsa05414:Dilated cardiomyopathy	16	1.06667	0.00672236	CACNA2D1, ADCY1, ADCY7, ITGA2, ITGA4, TTN, TPM2, TPM1, TPM4, TGFB1, TGFB2, ITGA6, ITGB8, ITGAV, GNAS, SGCB	617	84	6910	2.13321	0.844582	0.0478098	8.51431
GOTERM_MF_DIRECT	GO:0005547~phosphatidylinositol-3,4,5-trisphosphate binding	9	0.6	0.00679589	MYO10, ANXA8, MAPKAP1, FERMT2, IQGAP2, OGT, RACGAP1, ARAP2, IQGAP1	1283	38	16881	3.11624	0.999865	0.257019	10.5431
GOTERM_CC_DIRECT	GO:0097038~perinuclear endoplasmic reticulum	5	0.333333	0.0069039	CYBA, OSBPL3, OSBPL6, CAPN2, DBI	1375	11	18224	6.02446	0.979905	0.0908999	9.64757
GOTERM_MF_DIRECT	GO:0043394~proteoglycan binding	5	0.333333	0.00708274	CTSK, CECR1, CTSS, SLIT2, COL5A1	1283	11	16881	5.98066	0.999908	0.258945	10.9643
KEGG_PATHWAY	hsa05020:Prion diseases	9	0.6	0.00710694	C8A, C1QA, C8B, C7, C1QB, MAP2K1, LAMC1, CCL5, C1QC	617	33	6910	3.05437	0.860337	0.0492222	8.98052
GOTERM_BP_DIRECT	GO:0001568~blood vessel development	9	0.6	0.0071088	ITGAV, FOXF1, COL1A2, MDM2, COL1A1, ANTXR1, CEACAM1, COL5A1, FLVCR1	1286	38	16792	3.09258	1	0.284183	12.5505
GOTERM_BP_DIRECT	GO:0048146~positive regulation of fibroblast proliferation	11	0.733333	0.00717144	S100A6, CDKN1A, PDGFA, PDGFRA, ESR1, PDGFD, AQP1, TGFB1, GAS6, CD74, ANXA2	1286	54	16792	2.65987	1	0.283784	12.6541
GOTERM_CC_DIRECT	GO:0005587~collagen type IV trimer	4	0.266667	0.00719134	COL4A4, COL4A3, COL4A2, COL4A1	1375	6	18224	8.83588	0.982932	0.0923699	10.0298
GOTERM_BP_DIRECT	GO:0071260~cellular response to mechanical stimulus	13	0.866667	0.0072322	TNFRSF10A, CYBA, PTGER4, MAP3K1, CASP8, MMP7, ITGA2, COL1A1, FAS, SOX9, AQP1, CASP1, TGFB1	1286	71	16792	2.39082	1	0.283332	12.7546
GOTERM_BP_DIRECT	GO:0006936~muscle contraction	17	1.13333	0.00725752	SLC8A1, GNAO1, CRYAB, CALD1, MYH4, SSPN, TTN, TPM2, TPM1, TPM4, MYL9, SNTB1, MYH11, GAMT, ASPH, SCN7A, MYOF	1286	107	16792	2.07456	1	0.281724	12.7964
GOTERM_BP_DIRECT	GO:0045060~negative thymic T cell selection	5	0.333333	0.00727736	DOCK2, CCR7, CD3E, FAS, CD74	1286	11	16792	5.93525	1	0.279966	12.8291
GOTERM_BP_DIRECT	GO:0030033~microvillus assembly	6	0.4	0.0073984	KLF5, RAP2B, EZR, TNIK, RAPGEF6, RDX	1286	17	16792	4.60854	1	0.281508	13.0287
GOTERM_BP_DIRECT	GO:0050860~negative regulation of T cell receptor signaling pathway	6	0.4	0.0073984	EZR, LGALS3, PTPN22, CEACAM1, GBP1, THY1	1286	17	16792	4.60854	1	0.281508	13.0287
GOTERM_CC_DIRECT	GO:0015629~actin cytoskeleton	28	1.86667	0.00741551	CTTNBP2NL, ALDOA, GAS2L3, C9ORF72, TLN2, CALD1, STK17B, IQGAP2, ARHGAP35, CDH1, IQGAP1, EZR, GSN, WIPF1, CDC42EP3, FGD4, FYB, RAI14, SYNPO2, PALLD, FLNA, DDX58, ARPC1B, PPP1R9A, CORO1A, CFL2, MARCKS, KALRN	1375	218	18224	1.70233	0.984973	0.0930123	10.3268
GOTERM_BP_DIRECT	GO:0042060~wound healing	14	0.933333	0.00741887	PDGFA, TGFBR1, COL3A1, SPARC, EPB41L4B, ELK3, DCN, TPM1, TIMP1, TGFB2, CCL20, PECAM1, PDGFRA, LOX	1286	80	16792	2.28507	1	0.279808	13.0624
GOTERM_BP_DIRECT	GO:0001503~ossification	14	0.933333	0.00741887	IFITM1, MGP, SPARC, SOX9, COL5A2, CHRDL1, CTGF, BCL2, SORT1, RUNX2, BMP5, RUNX3, SPP1, CDH11	1286	80	16792	2.28507	1	0.279808	13.0624
GOTERM_BP_DIRECT	GO:0001768~establishment of T cell polarity	4	0.266667	0.00749852	DOCK2, CCR7, CCL21, CCL19	1286	6	16792	8.70503	1	0.280013	13.1935
GOTERM_BP_DIRECT	GO:2000107~negative regulation of leukocyte apoptotic process	4	0.266667	0.00749852	CCR7, CCL21, HCLS1, CCL19	1286	6	16792	8.70503	1	0.280013	13.1935
GOTERM_MF_DIRECT	GO:0004872~receptor activity	28	1.86667	0.00763315	PKHD1, F2RL1, ITGB2, NEO1, SEC62, CD48, PROCR, ITGB8, IL10RA, CD2, GUCY1A3, TNFRSF19, FAS, RAMP1, CSF2RA, LY75, NRXN3, TNFRSF17, CLEC4M, TNFRSF10A, CD86, THBD, TACSTD2, MCC, SEMA4D, ANTXR1, CD200, AOC1	1283	217	16881	1.69773	0.999955	0.268723	11.7673
GOTERM_BP_DIRECT	GO:0072659~protein localization to plasma membrane	12	0.8	0.0077541	FYB, MYO5A, ZDHHC23, EPB41L3, TNIK, ANK2, ANK3, RAPGEF6, CDH1, SYTL2, RAMP1, FLNA	1286	63	16792	2.48715	1	0.285708	13.6127
GOTERM_BP_DIRECT	GO:0042771~intrinsic apoptotic signaling pathway in response to DNA damage by p53 class mediator	8	0.533333	0.00778902	CDKN1A, NUPR1, HIPK2, PPP2R5C, SHISA5, PYCARD, IFI16, SIRT1	1286	31	16792	3.36969	1	0.284473	13.6698
GOTERM_BP_DIRECT	GO:0006958~complement activation, classical pathway	16	1.06667	0.0081229	IGHG1, C7, IGLV1-44, MASP2, IGKV1-17, IGHM, C1QC, C1QA, C8A, C1QB, C8B, IGHD, IGHA1, IGKC, IGLL5, IGLC1	1286	99	16792	2.11031	1	0.292358	14.2143
GOTERM_BP_DIRECT	GO:0007160~cell-matrix adhesion	15	1	0.00823369	NPNT, FERMT2, COL3A1, ITGA2, ITGB2, ITGA4, ITGA6, CD44, CTGF, ITGB8, ITGAV, FBLN5, SGCE, ANGPTL3, JAM3	1286	90	16792	2.17626	1	0.293369	14.3942
GOTERM_CC_DIRECT	GO:0043025~neuronal cell body	37	2.46667	0.00824991	MYO5A, PPT1, AKAP9, TIMP2, TGFB1, TGFB2, RGS10, DAB1, SOS1, PDE1A, PYCARD, DHODH, INPP5F, CYGB, SRD5A2, ACSL4, NQO1, SLC31A1, GHR, TRPM4, DDC, STMN2, CST3, TANC1, DPYSL2, FLNA, TMPRSS3, ANXA3, ASCL1, CYBA, LAMP1, MYO10, PPP1R9A, CPE, CCR2, KCNN2, SORT1	1375	315	18224	1.5568	0.990649	0.100744	11.4244
GOTERM_BP_DIRECT	GO:0001501~skeletal system development	20	1.33333	0.00827309	ALPL, AEBP1, EVC, TGFBR1, COL3A1, FBN1, SOX4, PKDCC, FRZB, SOX9, COL5A2, PRELP, TGFB2, CDKN1C, COL1A2, VCAN, COL1A1, PAPSS2, BMP5, CDH11	1286	137	16792	1.90621	1	0.292243	14.4581
GOTERM_BP_DIRECT	GO:0045860~positive regulation of protein kinase activity	10	0.666667	0.00842312	PTPRC, PPP1R9A, CDKN1A, CCR7, DAB1, CCL21, CCL19, IQGAP1, GAS6, LCP2	1286	47	16792	2.7782	1	0.294388	14.7011
GOTERM_CC_DIRECT	GO:0042470~melanosome	16	1.06667	0.00856444	MYO5A, BSG, PDIA3, NAP1L1, GGH, ANXA2, ANXA2P2, LAMP1, MYRIP, CAPG, ANXA11, MYH11, CTSD, SYTL2, GPNMB, GCHFR	1375	101	18224	2.09961	0.992181	0.102196	11.8349
GOTERM_BP_DIRECT	GO:0043547~positive regulation of GTPase activity	60	4	0.00858318	NRTN, A2M, PDGFA, ARHGAP18, RANGAP1, RAB3IP, IQGAP1, RAPGEF6, RAPGEF5, RAPGEF4, DOCK10, DOCK11, CSF2RA, ARHGEF3, F11R, ARHGEF18, THY1, ARHGAP30, NCK2, PDGFRA, GNAS, SEMA4D, KALRN, FGFR2, RALGPS1, AKAP13, ARHGAP35, AKAP9, CYTH2, KIT, CCL5, RGS10, DOCK2, TAGAP, CCL20, RASGRP1, SOS1, IL2RG, CDC42EP3, FGD4, ARHGDIB, CDC42EP5, GNAO1, DOCK9, CCL19, NCKAP1L, DOCK8, RACGAP1, CCL15, CCL18, FNBP1, RGS1, RA…	1286	565	16792	1.38664	1	0.29678	14.9595
GOTERM_BP_DIRECT	GO:0030512~negative regulation of transforming growth factor beta receptor signaling pathway	12	0.8	0.00873321	ASPN, PEG10, ADAMTSL2, TGFBR1, CHST11, TGFBR3, SMURF2, TGFB1I1, SIRT1, TGFB1, PMEPA1, PBLD	1286	64	16792	2.44829	1	0.298833	15.2011
GOTERM_CC_DIRECT	GO:0016323~basolateral plasma membrane	24	1.6	0.00892509	KCNJ16, FXYD2, CLDN7, SLCO4C1, ENPP1, SLC16A10, LEPR, ANXA1, CFTR, AQP1, AQP3, ANXA2, EPCAM, EZR, ANK2, ANK3, ADRA2A, SLC4A7, ABCC4, ANXA13, HEPH, ABCC1, STK39, HPGD	1375	180	18224	1.76718	0.993631	0.104095	12.3034
GOTERM_BP_DIRECT	GO:0006915~apoptotic process	60	4	0.00955738	IER3, FAM3B, PDCD2, CLPTM1L, DAB2, TMEM173, UNC5B, CXCR4, CASP8, FAS, ITCH, OGT, CASP1, MX1, MAGEH1, GZMA, VIL1, CST3, RB1, STK4, ELMO2, PRKCB, TNFRSF10A, SERPINB9, EPB41L3, TNFAIP8, CTSC, FGFR2, TNFRSF21, GULP1, STK17B, EGLN3, BEX2, ITGB2, PLAGL1, PEG10, UBE2D3, TRIM69, BCL2, MAP3K1, CD2, PYCARD, TNFRSF19, FAIM, XAF1, INPP5D, TRAF5, CKAP2, TGFBR1, MZB1, KLF11, CHI3L1, STAT1, CARD6, S100A14, GAS6…	1286	567	16792	1.38175	1	0.319666	16.5167
GOTERM_BP_DIRECT	GO:0010039~response to iron ion	6	0.4	0.00960895	C1QA, CCND1, BCL2, CYBRD1, MDM2, ABAT	1286	18	16792	4.35251	1	0.318734	16.5984
GOTERM_BP_DIRECT	GO:2000134~negative regulation of G1/S transition of mitotic cell cycle	7	0.466667	0.0099286	CDKN1A, DACT1, BCL2, RB1, SLFN11, GPNMB, SMARCA4	1286	25	16792	3.65611	1	0.325055	17.1029
GOTERM_BP_DIRECT	GO:0007159~leukocyte cell-cell adhesion	7	0.466667	0.0099286	EZR, ITGB2, ITGA4, CCL5, SELE, CLEC4M, SYK	1286	25	16792	3.65611	1	0.325055	17.1029
KEGG_PATHWAY	hsa05142:Chagas disease (American trypanosomiasis)	18	1.2	0.00999202	PIK3CG, ADCY1, GNAO1, CD3D, CD3E, TGFBR1, CD247, CCL5, C1QC, TGFB1, TGFB2, C1QA, C1QB, MAPK13, CASP8, GNAS, FAS, PIK3R3	617	104	6910	1.93835	0.937442	0.0669455	12.4086
KEGG_PATHWAY	hsa05220:Chronic myeloid leukemia	14	0.933333	0.0102425	PIK3CG, E2F3, CTBP2, MAP2K1, TGFBR1, RB1, TGFB1, TGFB2, CDKN1A, CCND1, CBLB, SOS1, MDM2, PIK3R3	617	72	6910	2.17765	0.941663	0.0669581	12.7006
GOTERM_BP_DIRECT	GO:0043206~extracellular fibril organization	5	0.333333	0.0102626	LTBP2, COL3A1, CST3, MFAP4, COL5A1	1286	12	16792	5.44064	1	0.33159	17.6271
GOTERM_BP_DIRECT	GO:0070301~cellular response to hydrogen peroxide	11	0.733333	0.0105175	CYP1B1, ETS1, IMPACT, AKR1B1, CST3, ANXA1, MDM2, PDGFD, KLF2, AQP1, SIRT1	1286	57	16792	2.51988	1	0.335898	18.0249
GOTERM_BP_DIRECT	GO:0007166~cell surface receptor signaling pathway	33	2.2	0.0109902	IFITM1, CD8A, TSPAN3, LEPR, CD247, ITPKB, CD53, IL7R, GPR88, CXCL10, TSPAN12, CASP8, CLEC2D, CD2, CD27, CSNK1A1, PTPRC, COL4A3, BSG, CD3D, CD3E, MET, ANXA1, GEM, TNFRSF10A, IRF9, CBLB, CD37, CCR5, SSTR1, TACSTD2, CD59, GFRA1	1286	274	16792	1.57262	1	0.345662	18.7579
GOTERM_BP_DIRECT	GO:0010718~positive regulation of epithelial to mesenchymal transition	8	0.533333	0.0110729	DAB2, TGFBR1, EPB41L5, LEF1, TGFB1I1, COL1A1, TGFB1, TGFB2	1286	33	16792	3.16546	1	0.345373	18.8856
GOTERM_BP_DIRECT	GO:0051897~positive regulation of protein kinase B signaling	14	0.933333	0.0111135	PIK3CG, PDGFA, TGFBR1, IL18, HCLS1, CHI3L1, CCL19, TSPYL5, GAS6, TGFB1, CCR7, CCL21, F3, GATA3	1286	84	16792	2.17626	1	0.344035	18.9482
GOTERM_MF_DIRECT	GO:0008083~growth factor activity	22	1.46667	0.0111442	CXCL1, NRTN, PDGFA, EFEMP1, CECR1, JAG1, FGF21, MDK, TGFB1, HDGFRP3, TIMP1, TGFB2, LIF, VEGFC, RABEP2, CTGF, GRN, INHBC, PDGFD, ANGPTL3, GDF15, BMP5	1283	162	16881	1.78681	1	0.358443	16.7317
GOTERM_MF_DIRECT	GO:0001968~fibronectin binding	7	0.466667	0.0116681	CTSK, LPA, CTGF, ITGAV, CCDC80, ITGA4, CTSS	1283	26	16881	3.54239	1	0.36312	17.4495
GOTERM_MF_DIRECT	GO:0034987~immunoglobulin receptor binding	7	0.466667	0.0116681	IGHG1, IGHD, IGHA1, IGKC, IGHM, IGLL5, IGLC1	1283	26	16881	3.54239	1	0.36312	17.4495
GOTERM_BP_DIRECT	GO:0016477~cell migration	23	1.53333	0.0120282	CTHRC1, FUT8, USP9Y, PODXL, WWC1, ARHGAP35, PALLD, MDK, COL5A1, TGFB1, ELMO2, GAS6, EPHA3, TGFB2, NCK2, CTGF, ITGAV, FAT1, TGFBR3, JAK3, LAMC1, CD24, CEACAM1	1286	172	16792	1.74607	1	0.364107	20.3459
GOTERM_BP_DIRECT	GO:0050871~positive regulation of B cell activation	7	0.466667	0.0120896	IGHG1, IGHD, IGHA1, IGKC, IGHM, IGLL5, IGLC1	1286	26	16792	3.51549	1	0.363174	20.439
GOTERM_BP_DIRECT	GO:0072661~protein targeting to plasma membrane	7	0.466667	0.0120896	TESC, BSG, ANK2, ANK3, NFASC, GAS6, ANXA2	1286	26	16792	3.51549	1	0.363174	20.439
GOTERM_MF_DIRECT	GO:0005114~type II transforming growth factor beta receptor binding	4	0.266667	0.0121221	TGFBR1, TGFBR3, TGFB1, TGFB2	1283	7	16881	7.51854	1	0.365832	18.0669
GOTERM_BP_DIRECT	GO:0045879~negative regulation of smoothened signaling pathway	6	0.4	0.0122342	GPC3, SERPINE2, CD3E, GLIS2, RB1, RUNX2	1286	19	16792	4.12343	1	0.364227	20.6576
GOTERM_BP_DIRECT	GO:0030854~positive regulation of granulocyte differentiation	4	0.266667	0.01238	TESC, HCLS1, LEF1, OGT	1286	7	16792	7.46145	1	0.365292	20.8775
GOTERM_BP_DIRECT	GO:0070233~negative regulation of T cell apoptotic process	4	0.266667	0.01238	PRKCQ, DOCK8, CCL5, CD27	1286	7	16792	7.46145	1	0.365292	20.8775
GOTERM_BP_DIRECT	GO:0002606~positive regulation of dendritic cell antigen processing and presentation	4	0.266667	0.01238	CCR7, CCL21, CCL19, CD74	1286	7	16792	7.46145	1	0.365292	20.8775
GOTERM_BP_DIRECT	GO:0048251~elastic fiber assembly	4	0.266667	0.01238	FBLN5, MYH11, LOX, MFAP4	1286	7	16792	7.46145	1	0.365292	20.8775
GOTERM_BP_DIRECT	GO:0046598~positive regulation of viral entry into host cell	4	0.266667	0.01238	TRIM38, TMPRSS2, LGALS9, TRIM21	1286	7	16792	7.46145	1	0.365292	20.8775
GOTERM_BP_DIRECT	GO:0035726~common myeloid progenitor cell proliferation	4	0.266667	0.01238	FBXO4, ITPKB, CEACAM1, GSTP1	1286	7	16792	7.46145	1	0.365292	20.8775
GOTERM_BP_DIRECT	GO:0034340~response to type I interferon	4	0.266667	0.01238	SHMT2, SP100, ISG15, MX1	1286	7	16792	7.46145	1	0.365292	20.8775
GOTERM_MF_DIRECT	GO:0008307~structural constituent of muscle	9	0.6	0.0125386	KRT19, MYH11, ASPH, NEXN, TPM2, TTN, TPM1, TPM4, MYL9	1283	42	16881	2.81945	1	0.367515	18.6295
GOTERM_CC_DIRECT	GO:0005796~Golgi lumen	15	1	0.0126673	LUM, HS3ST1, DCN, MUC6, GAS6, TGFB1, PRELP, GPC4, OMD, BGN, GPC3, VCAN, PCSK5, DEFB1, MUC13	1375	96	18224	2.07091	0.999246	0.141852	17.0296
GOTERM_BP_DIRECT	GO:0043588~skin development	8	0.533333	0.0130455	FRAS1, ITGA6, PDGFA, COL3A1, ADAMTS2, COL5A2, LTB, COL5A1	1286	34	16792	3.07236	1	0.378296	21.8737
GOTERM_BP_DIRECT	GO:0045599~negative regulation of fat cell differentiation	9	0.6	0.0130892	ZFP36L2, ENPP1, GATA3, SORT1, ID4, JAG1, GPER1, SIRT1, TGFB1	1286	42	16792	2.79804	1	0.3769	21.9387
GOTERM_BP_DIRECT	GO:0009725~response to hormone	9	0.6	0.0130892	RERG, SORD, SNRPN, HCLS1, OXCT1, ANGPTL3, TIMP2, ACAT1, TIMP1	1286	42	16792	2.79804	1	0.3769	21.9387
GOTERM_BP_DIRECT	GO:0097191~extrinsic apoptotic signaling pathway	9	0.6	0.0130892	TNFRSF10A, KRT18, KRT8, CASP8, MLLT11, FAS, TGFB1, CD27, TGFB2	1286	42	16792	2.79804	1	0.3769	21.9387
GOTERM_CC_DIRECT	GO:0008305~integrin complex	7	0.466667	0.0136045	ITGA6, ITGB8, ITGAV, ITGA2, ITGB2, ITGA4, ITGAM	1375	27	18224	3.43618	0.999559	0.148665	18.1755
GOTERM_CC_DIRECT	GO:0030864~cortical actin cytoskeleton	9	0.6	0.0138436	MYRIP, PPP1R9A, CORO1A, CAP2, GSN, AKAP13, CDH1, RDX, CAPN2	1375	43	18224	2.77405	0.999615	0.148244	18.4654
GOTERM_BP_DIRECT	GO:0006957~complement activation, alternative pathway	5	0.333333	0.0139391	C8A, C8B, C7, CFD, CFHR5	1286	13	16792	5.02213	1	0.393438	23.1927
GOTERM_BP_DIRECT	GO:2000484~positive regulation of interleukin-8 secretion	5	0.333333	0.0139391	CD58, F2RL1, CD2, PYCARD, LGALS9	1286	13	16792	5.02213	1	0.393438	23.1927
GOTERM_BP_DIRECT	GO:0003215~cardiac right ventricle morphogenesis	5	0.333333	0.0139391	GATA3, SOX4, SEMA3C, JAG1, TGFB2	1286	13	16792	5.02213	1	0.393438	23.1927
KEGG_PATHWAY	hsa02010:ABC transporters	10	0.666667	0.0139399	ABCC9, TAP2, TAP1, ABCC4, ABCC1, ABCB1, CFTR, ABCA6, ABCA5, ABCG2	617	44	6910	2.54531	0.979235	0.0881227	16.9065
GOTERM_MF_DIRECT	GO:0005496~steroid binding	7	0.466667	0.0140603	AR, ESRRG, ESR1, SULT1E1, GPER1, UGT1A1, PAQR5	1283	27	16881	3.41119	1	0.393589	20.6542
GOTERM_MF_DIRECT	GO:0004181~metallocarboxypeptidase activity	7	0.466667	0.0140603	AGBL3, AEBP1, FOLH1, CPE, FOLH1B, ACE2, CPA3	1283	27	16881	3.41119	1	0.393589	20.6542
GOTERM_BP_DIRECT	GO:0042542~response to hydrogen peroxide	10	0.666667	0.0143074	TXNIP, SLC8A1, GNAO1, STK24, CRYAB, BCL2, COL1A1, STAT1, SIRT1, FKBP1B	1286	51	16792	2.5603	1	0.399011	23.7302
GOTERM_BP_DIRECT	GO:0043066~negative regulation of apoptotic process	49	3.26667	0.0143858	IER3, CLDN7, PKHD1, PPT1, AQP1, SOX9, CD74, TIMP1, EPCAM, DAB2, CD44, GATA6, ALB, BCL2, BCL11B, CHST11, FAIM, FAS, ITCH, PRKAA2, NQO1, CD27, CRYAB, ANXA1, NCKAP1L, LEF1, ANXA5, SIRT1, ANXA4, FLNA, GAS6, IFIT3, SERPINB9, DHRS2, ASCL1, ATF5, CDKN1A, KRT18, CCND2, UCP2, CD59, TNFAIP8, MDM2, SEMA4D, GRK5, HTR2B, EIF2AK2, GSTP1, ARHGAP10	1286	455	16792	1.4062	1	0.398276	23.8441
GOTERM_MF_DIRECT	GO:0046332~SMAD binding	9	0.6	0.0144074	DAB2, TGFBR1, COL3A1, HIPK2, COL1A2, TGFBR3, SMURF2, COL5A2, FLNA	1283	43	16881	2.75388	1	0.392949	21.1093
GOTERM_BP_DIRECT	GO:0031032~actomyosin structure organization	7	0.466667	0.0145611	F11R, EPB41L3, TRPM7, EPB41L5, EPB41L4A, EPB41L4B, MYLIP	1286	27	16792	3.38529	1	0.39961	24.0983
GOTERM_BP_DIRECT	GO:0035987~endodermal cell differentiation	7	0.466667	0.0145611	COL4A2, ITGAV, ITGB2, ITGA4, COL8A1, LAMB1, MMP2	1286	27	16792	3.38529	1	0.39961	24.0983
GOTERM_BP_DIRECT	GO:0006956~complement activation	14	0.933333	0.0147171	IGHG1, C7, IGLV1-44, MASP2, IGKV1-17, COLEC11, C1QC, C1QA, C8A, C1QB, C8B, CFD, IGKC, IGLC1	1286	87	16792	2.10121	1	0.400515	24.3239
GOTERM_BP_DIRECT	GO:0043433~negative regulation of sequence-specific DNA binding transcription factor activity	11	0.733333	0.0149334	SFRP5, SP100, GLIS2, ESR1, PBX1, ID3, RB1, SIRT1, FLNA, GAS6, SIGIRR	1286	60	16792	2.39388	1	0.402661	24.6356
GOTERM_BP_DIRECT	GO:0006461~protein complex assembly	17	1.13333	0.015308	LPXN, CLGN, NUPR1, CD3E, GMNN, MITF, VIL1, CAPG, IL1RAP, NCKAP1L, MDM2, FAS, WIPF1, LAMC1, SOX9, CD74, FANCC	1286	116	16792	1.91361	1	0.408007	25.1724
GOTERM_MF_DIRECT	GO:0003725~double-stranded RNA binding	11	0.733333	0.0158821	DDX58, IFIH1, OASL, A1CF, DDX60, VIM, OAS3, MYH4, OAS1, OAS2, EIF2AK2	1283	61	16881	2.37265	1	0.415223	23.0159
GOTERM_CC_DIRECT	GO:0097454~Schwann cell microvillus	3	0.2	0.0161864	EZR, AKR1B1, NFASC	1375	3	18224	13.2538	0.999899	0.168127	21.2565
GOTERM_CC_DIRECT	GO:0030895~apolipoprotein B mRNA editing enzyme complex	3	0.2	0.0161864	A1CF, APOBEC3G, APOBEC3F	1375	3	18224	13.2538	0.999899	0.168127	21.2565
GOTERM_MF_DIRECT	GO:0046977~TAP binding	3	0.2	0.0164156	HLA-A, HLA-C, HLA-B	1283	3	16881	13.1574	1	0.417736	23.695
GOTERM_BP_DIRECT	GO:0032252~secretory granule localization	3	0.2	0.0166611	PIK3CG, MYO5A, RASGRP1	1286	3	16792	13.0575	1	0.432586	27.0819
GOTERM_BP_DIRECT	GO:0002486~antigen processing and presentation of endogenous peptide antigen via MHC class I via ER pathway, TAP-independent	3	0.2	0.0166611	HLA-A, HLA-C, HLA-B	1286	3	16792	13.0575	1	0.432586	27.0819
GOTERM_MF_DIRECT	GO:0005085~guanyl-nucleotide exchange factor activity	17	1.13333	0.0166761	ARHGEF3, RALGPS1, ARHGEF18, DOCK9, AKAP13, DOCK8, DOCK2, TAGAP, RASGRP1, SOS1, RAPGEF6, RAPGEF5, RAPGEF4, DOCK10, DOCK11, FGD4, KALRN	1283	118	16881	1.89556	1	0.414965	24.0245
GOTERM_MF_DIRECT	GO:0017048~Rho GTPase binding	7	0.466667	0.016774	FMNL2, IQGAP3, AKAP13, IQGAP2, DOCK11, FLNA, RHOH	1283	28	16881	3.28936	1	0.409283	24.148
GOTERM_BP_DIRECT	GO:0006910~phagocytosis, recognition	7	0.466667	0.0173628	IGHG1, IGHD, IGHA1, IGKC, IGHM, IGLL5, IGLC1	1286	28	16792	3.26439	1	0.44362	28.0539
GOTERM_MF_DIRECT	GO:0005095~GTPase inhibitor activity	5	0.333333	0.017888	IQGAP2, CDC42SE1, IQGAP1, SLIT2, RHOH	1283	14	16881	4.69909	1	0.422262	25.54
GOTERM_MF_DIRECT	GO:0004185~serine-type carboxypeptidase activity	5	0.333333	0.017888	SCPEP1, AEBP1, CPE, CTSA, CPVL	1283	14	16881	4.69909	1	0.422262	25.54
GOTERM_BP_DIRECT	GO:0035264~multicellular organism growth	13	0.866667	0.0181355	CDKN1C, FGFR2, ATF5, AR, SLC1A2, SOS1, ARID5B, HEG1, PDE4D, PKDCC, GNAS, KLF2, FLVCR1	1286	80	16792	2.12185	1	0.455595	29.11
GOTERM_MF_DIRECT	GO:0042379~chemokine receptor binding	4	0.266667	0.0183109	CCL21, CCL19, CCL5, S100A14	1283	8	16881	6.57872	1	0.422449	26.0622
GOTERM_BP_DIRECT	GO:2000147~positive regulation of cell motility	5	0.333333	0.0183537	EPCAM, CLDN7, CCR7, CCL21, CCL19	1286	14	16792	4.66341	1	0.457131	29.4055
GOTERM_BP_DIRECT	GO:0019079~viral genome replication	5	0.333333	0.0183537	CTBP2, CXCR6, GAS6, NFIA, CLEC4M	1286	14	16792	4.66341	1	0.457131	29.4055
KEGG_PATHWAY	hsa04978:Mineral absorption	10	0.666667	0.0184787	FXYD2, TRPM7, CYBRD1, HEPH, SLC31A1, MT1H, STEAP1, MT1X, MT1G, MT1F	617	46	6910	2.43464	0.994188	0.112828	21.8132
GOTERM_BP_DIRECT	GO:0032088~negative regulation of NF-kappaB transcription factor activity	12	0.8	0.0184976	NLRC5, IRAK3, PTGIS, NLRC3, CYP1B1, PKHD1, LRRC1, PYCARD, ITCH, SIRT1, ANXA4, TRIM21	1286	71	16792	2.20691	1	0.457299	29.5999
GOTERM_BP_DIRECT	GO:0071347~cellular response to interleukin-1	12	0.8	0.0184976	PTGIS, CCL20, CCL21, TFPI, PYCARD, CHI3L1, CCL19, CCL5, KLF2, SOX9, CCL15, CCL18	1286	71	16792	2.20691	1	0.457299	29.5999
GOTERM_BP_DIRECT	GO:0001945~lymph vessel development	4	0.266667	0.0186922	TMEM204, HEG1, NR2F2, SYK	1286	8	16792	6.52877	1	0.458373	29.8617
GOTERM_BP_DIRECT	GO:0010529~negative regulation of transposition	4	0.266667	0.0186922	APOBEC3B, APOBEC3G, APOBEC3F, APOBEC3C	1286	8	16792	6.52877	1	0.458373	29.8617
GOTERM_BP_DIRECT	GO:0001766~membrane raft polarization	4	0.266667	0.0186922	DOCK2, MALL, CD2, CMTM8	1286	8	16792	6.52877	1	0.458373	29.8617
GOTERM_BP_DIRECT	GO:0019064~fusion of virus membrane with host plasma membrane	4	0.266667	0.0186922	CCR5, HSBP1L1, CXCR4, GAS6	1286	8	16792	6.52877	1	0.458373	29.8617
GOTERM_BP_DIRECT	GO:0045576~mast cell activation	4	0.266667	0.0186922	CD48, NDRG1, LCP2, RHOH	1286	8	16792	6.52877	1	0.458373	29.8617
GOTERM_BP_DIRECT	GO:0034695~response to prostaglandin E	4	0.266667	0.0186922	CCR7, CCL21, TGFBR3, CCL19	1286	8	16792	6.52877	1	0.458373	29.8617
GOTERM_BP_DIRECT	GO:0010818~T cell chemotaxis	4	0.266667	0.0186922	PIK3CG, GPR183, CXCL11, CXCL10	1286	8	16792	6.52877	1	0.458373	29.8617
GOTERM_BP_DIRECT	GO:0071493~cellular response to UV-B	4	0.266667	0.0186922	CDKN1A, CRIP1, MME, MFAP4	1286	8	16792	6.52877	1	0.458373	29.8617
GOTERM_BP_DIRECT	GO:0002456~T cell mediated immunity	4	0.266667	0.0186922	CD8A, JAG1, BTN3A3, BTN3A2	1286	8	16792	6.52877	1	0.458373	29.8617
GOTERM_BP_DIRECT	GO:1902715~positive regulation of interferon-gamma secretion	4	0.266667	0.0186922	RASGRP1, CD2, PTPN22, LGALS9	1286	8	16792	6.52877	1	0.458373	29.8617
GOTERM_BP_DIRECT	GO:0045059~positive thymic T cell selection	4	0.266667	0.0186922	DOCK2, CD3D, ITPKB, CD74	1286	8	16792	6.52877	1	0.458373	29.8617
GOTERM_MF_DIRECT	GO:0008237~metallopeptidase activity	13	0.866667	0.0188186	ADAM28, ERMP1, TRHDE, CNDP1, ADAMTSL3, THOP1, MME, MMP2, LNPEP, ACE2, STAMBPL1, YME1L1, ADAMTS2	1283	81	16881	2.11169	1	0.424078	26.6844
GOTERM_BP_DIRECT	GO:0019835~cytolysis	6	0.4	0.0188522	C8A, C8B, C7, MICB, GZMA, LYZ	1286	21	16792	3.73073	1	0.458815	30.0764
KEGG_PATHWAY	hsa04660:T cell receptor signaling pathway	17	1.13333	0.0193693	PIK3CG, PTPRC, ITK, CD8A, CD3D, MAP2K1, CD3E, CD247, PRKCQ, NCK2, CBLB, MAPK13, RASGRP1, SOS1, LCK, PIK3R3, LCP2	617	103	6910	1.84844	0.995476	0.115463	22.7441
KEGG_PATHWAY	hsa05410:Hypertrophic cardiomyopathy (HCM)	14	0.933333	0.0194886	CACNA2D1, ITGA6, ITGB8, ITGAV, ITGA2, PRKAA2, ITGA4, TPM2, TTN, TPM1, TPM4, TGFB1, TGFB2, SGCB	617	78	6910	2.01014	0.995625	0.113709	22.8679
GOTERM_BP_DIRECT	GO:0008015~blood circulation	9	0.6	0.0195319	COL4A3, HOXB2, FLI1, LPA, AVPR1A, GUCY1A3, STAT1, MYOF, CXCL10	1286	45	16792	2.61151	1	0.468352	30.9814
KEGG_PATHWAY	hsa00260:Glycine, serine and threonine metabolism	9	0.6	0.0196237	SHMT2, MAOA, PHGDH, AGXT2, GAMT, GNMT, PSAT1, SARDH, CBS	617	39	6910	2.58447	0.995789	0.112115	23.0081
GOTERM_CC_DIRECT	GO:0043209~myelin sheath	20	1.33333	0.020265	LDHB, GNAO1, PDIA3, CRYAB, NFASC, FAM213B, RDX, CLDN11, DPYSL2, THY1, PKM, EZR, HSPA2, ALB, BCL2, PHGDH, NDRG1, TUBA1A, SNAP25, NDUFS1	1375	152	18224	1.74392	0.99999	0.202608	25.9042
GOTERM_MF_DIRECT	GO:0003714~transcription corepressor activity	25	1.66667	0.0202984	AEBP1, SP100, CTBP2, HSBP1L1, THRB, KLF12, GMNN, LMCD1, ARHGAP35, ELK3, TRIM22, SIRT1, ATF5, CCND1, PBXIP1, HIPK2, TGIF1, ID4, ID3, NR2F2, TBL1X, TCF4, BHLHE41, NCOR1, SMARCA4	1283	203	16881	1.62037	1	0.441596	28.4703
GOTERM_BP_DIRECT	GO:0048008~platelet-derived growth factor receptor signaling pathway	7	0.466667	0.0205134	TXNIP, PLAT, PDGFA, ARID5B, PDGFRA, PDGFD, IQGAP1	1286	29	16792	3.15182	1	0.482689	32.2687
GOTERM_BP_DIRECT	GO:0043542~endothelial cell migration	7	0.466667	0.0205134	CYP1B1, TGFBR1, FAP, PECAM1, ITGB2, STAT1, PRKX	1286	29	16792	3.15182	1	0.482689	32.2687
GOTERM_BP_DIRECT	GO:0009611~response to wounding	11	0.733333	0.0206008	ZFP36L2, VWF, SLC1A2, SULF2, PDGFA, CTGF, CCR2, ID3, MDK, TGFB1, TGFB2	1286	63	16792	2.27989	1	0.481727	32.3822
GOTERM_BP_DIRECT	GO:0032729~positive regulation of interferon-gamma production	9	0.6	0.0221085	CD3E, IL18, CCR2, HLA-A, PYCARD, HLA-DPA1, PDE4D, HLA-DPB1, IFNAR1	1286	46	16792	2.55474	1	0.503873	34.3123
GOTERM_MF_DIRECT	GO:0051287~NAD binding	8	0.533333	0.0226146	GPD1L, LDHB, CTBP2, SORD, AOX1, PHGDH, GLYR1, HPGD	1283	38	16881	2.76999	1	0.470647	31.1838
GOTERM_BP_DIRECT	GO:0042632~cholesterol homeostasis	11	0.733333	0.0227985	ACSM3, TMEM97, MALL, NUS1, DGAT2, IL18, MYLIP, CD24, ANGPTL3, LIPC, SIRT1	1286	64	16792	2.24427	1	0.512273	35.1781
GOTERM_BP_DIRECT	GO:0002230~positive regulation of defense response to virus by host	6	0.4	0.0228987	DDX58, TMEM173, PYCARD, PTPN22, APOBEC3G, APOBEC3F	1286	22	16792	3.56115	1	0.511386	35.303
GOTERM_BP_DIRECT	GO:0034113~heterotypic cell-cell adhesion	6	0.4	0.0228987	ITGAV, CD58, NFASC, CD2, ITGB2, ITGA4	1286	22	16792	3.56115	1	0.511386	35.303
GOTERM_BP_DIRECT	GO:0034446~substrate adhesion-dependent cell spreading	8	0.533333	0.0234737	MICALL2, ITGAV, FERMT2, ITGA4, LAMC1, ANTXR1, LAMB1, FZD7	1286	38	16792	2.74896	1	0.517762	36.0149
GOTERM_MF_DIRECT	GO:0001948~glycoprotein binding	11	0.733333	0.0240137	PLAT, VWF, VIM, LCK, ACE2, CDH1, CTSA, ITGB2, FLNA, TGFB1, ITGAM	1283	65	16881	2.22664	1	0.484104	32.7756
GOTERM_BP_DIRECT	GO:0071773~cellular response to BMP stimulus	7	0.466667	0.0240299	SMAD9, SPINT2, GATA6, GATA3, SPINT1, TMEM100, RUNX2	1286	30	16792	3.04676	1	0.523695	36.6966
GOTERM_BP_DIRECT	GO:0060325~face morphogenesis	7	0.466667	0.0240299	CRISPLD2, ARID5B, LEF1, COL1A1, MMP2, TGFB1, TGFB2	1286	30	16792	3.04676	1	0.523695	36.6966
GOTERM_BP_DIRECT	GO:0045893~positive regulation of transcription, DNA-templated	53	3.53333	0.0244554	E2F3, MITF, ZIC1, LGR4, TGFB1, DAB2, LBH, GATA6, FOXF1, GATA3, ASPH, NR2F2, AR, SP100, PCBD2, ESR1, LEF1, RB1, IFNAR1, CD86, MLLT11, HIPK2, MYRF, TGFB1I1, COL1A1, SMARCA4, GLIS2, SOX4, EHF, CDH1, ELK3, MYBL1, SOX9, MDK, TCF4, RUNX2, RUNX3, KLF5, TESC, MAP2K1, TGFBR1, ESRRG, STAT1, BRCA1, FZD7, CDKN1C, ATF5, ETS1, IRF7, KDM8, SETD7, KLF2, TBL1X	1286	515	16792	1.34379	1	0.527565	37.2133
KEGG_PATHWAY	hsa05230:Central carbon metabolism in cancer	12	0.8	0.0245953	PIK3CG, FGFR2, PKM, MAP2K1, HKDC1, GLS, MET, PDGFRA, PFKP, KIT, PFKM, PIK3R3	617	64	6910	2.09988	0.998965	0.136048	28.0028
GOTERM_BP_DIRECT	GO:0071230~cellular response to amino acid stimulus	9	0.6	0.0249157	COL4A1, COL3A1, COL1A2, PDGFD, COL1A1, CAPN2, RRAGD, MMP2, COL5A2	1286	47	16792	2.50038	1	0.53186	37.7679
GOTERM_BP_DIRECT	GO:0046330~positive regulation of JNK cascade	11	0.733333	0.0251609	CCR7, CTGF, CCL21, RASGRP1, HIPK2, F2RL1, PYCARD, CCL19, TNFRSF19, FZD7, CD27	1286	65	16792	2.20974	1	0.532991	38.0614
GOTERM_BP_DIRECT	GO:0051384~response to glucocorticoid	11	0.733333	0.0251609	ALPL, TYMS, PTGDS, HNMT, BCHE, BCL2, FAS, SPARC, MDK, ANXA3, GHR	1286	65	16792	2.20974	1	0.532991	38.0614
GOTERM_BP_DIRECT	GO:0016049~cell growth	10	0.666667	0.0253621	TYMS, AR, NUPR1, ITGAV, BCL2, TGFBR3, EMP3, IL7R, TGFB1, TGFB2	1286	56	16792	2.3317	1	0.533481	38.3012
GOTERM_BP_DIRECT	GO:0007173~epidermal growth factor receptor signaling pathway	10	0.666667	0.0253621	NCK2, CBLB, SOS1, VIL1, EFEMP1, PIGR, SOX9, TGFB1, IQGAP1, PAG1	1286	56	16792	2.3317	1	0.533481	38.3012
GOTERM_MF_DIRECT	GO:0019900~kinase binding	12	0.8	0.0255561	ATF5, LDHB, SP100, WWC1, PTPN22, RB1, FAS, PER3, PFKM, JAKMIP2, FLNA, CEACAM1	1283	75	16881	2.10519	1	0.49869	34.4906
GOTERM_MF_DIRECT	GO:0045236~CXCR chemokine receptor binding	4	0.266667	0.0259372	CXCL1, CXCL2, CXCL6, ITCH	1283	9	16881	5.84775	1	0.496889	34.9079
KEGG_PATHWAY	hsa05160:Hepatitis C	20	1.33333	0.0261332	PIK3CG, CLDN7, RXRA, OAS3, CLDN10, OAS1, OAS2, CLDN11, STAT1, STAT2, IFNAR1, DDX58, IRF9, IFIT1, CDKN1A, MAPK13, SOS1, IRF7, EIF2AK2, PIK3R3	617	133	6910	1.68411	0.99933	0.141239	29.4861
GOTERM_CC_DIRECT	GO:0031941~filamentous actin	7	0.466667	0.0261905	FERMT2, IQGAP2, DPYSL3, TMSB10, TPM1, FLNA, TPM4	1375	31	18224	2.9928	1	0.250128	32.2028
GOTERM_BP_DIRECT	GO:0048103~somatic stem cell division	4	0.266667	0.0264656	ZFP36L2, KIT, FZD7, TGFB2	1286	9	16792	5.80335	1	0.546521	39.6012
GOTERM_BP_DIRECT	GO:0032930~positive regulation of superoxide anion generation	4	0.266667	0.0264656	CYBA, F2RL1, TGFB1, GSTP1	1286	9	16792	5.80335	1	0.546521	39.6012
GOTERM_BP_DIRECT	GO:0035456~response to interferon-beta	4	0.266667	0.0264656	BST2, IFITM1, XAF1, STAT1	1286	9	16792	5.80335	1	0.546521	39.6012
GOTERM_MF_DIRECT	GO:0043425~bHLH transcription factor binding	6	0.4	0.0266763	ASCL1, BHLHE41, TCF4, SOX9, RUNX2, SIRT1	1283	23	16881	3.43238	1	0.499892	35.7102
GOTERM_MF_DIRECT	GO:0043027~cysteine-type endopeptidase inhibitor activity involved in apoptotic process	6	0.4	0.0266763	SERPINB9, VIL1, TNFAIP8, LEF1, GAS6, CD27	1283	23	16881	3.43238	1	0.499892	35.7102
GOTERM_BP_DIRECT	GO:0030890~positive regulation of B cell proliferation	8	0.533333	0.0267805	PTPRC, GPR183, CDKN1A, TNFSF13B, SLC39A10, BCL2, NCKAP1L, CD74	1286	39	16792	2.67847	1	0.548455	39.9674
GOTERM_BP_DIRECT	GO:0043086~negative regulation of catalytic activity	12	0.8	0.0268448	TXNIP, ACACB, ANXA5, NQO1, UGT1A1, ANXA4, ANXA3, PPP1R14A, ANXA2, FNIP2, TIMP1, ANXA2P2	1286	75	16792	2.08921	1	0.546974	40.0419
GOTERM_MF_DIRECT	GO:0030170~pyridoxal phosphate binding	10	0.666667	0.0269583	BCAT1, MOCOS, AADAT, DDC, SHMT2, ALB, ABAT, AGXT2, THNSL1, CBS	1283	57	16881	2.30832	1	0.49686	36.0138
GOTERM_BP_DIRECT	GO:0007568~aging	21	1.4	0.0272042	GNAO1, SLC12A2, CRYAB, COL3A1, MMP7, ITGB2, PDE4D, DCN, TIMP2, TGFB1, TIMP1, CDKN1C, TYMS, PPP1R9A, CD86, CTGF, UCP2, ABAT, CTSC, FBXO4, NQO1	1286	165	16792	1.66187	1	0.549476	40.4568
KEGG_PATHWAY	hsa05214:Glioma	12	0.8	0.0273168	PIK3CG, CDKN1A, E2F3, CCND1, MAP2K1, PDGFA, SOS1, PDGFRA, MDM2, RB1, PIK3R3, PRKCB	617	65	6910	2.06757	0.999521	0.144447	30.6084
GOTERM_BP_DIRECT	GO:0046835~carbohydrate phosphorylation	6	0.4	0.027467	GALK1, GNPTAB, GNE, HKDC1, PFKM, XYLB	1286	23	16792	3.40632	1	0.550653	40.7585
GOTERM_BP_DIRECT	GO:0030593~neutrophil chemotaxis	11	0.733333	0.027694	PIK3CG, LGALS3, CCL20, NCKAP1L, ITGB2, PDE4D, CCL5, CCL15, CCL18, TGFB2, SYK	1286	66	16792	2.17626	1	0.551342	41.0179
GOTERM_BP_DIRECT	GO:0031667~response to nutrient levels	7	0.466667	0.0279278	CYBA, SORD, CST3, MMP7, SRD5A2, FGF21, ACACB	1286	31	16792	2.94848	1	0.55211	41.2839
KEGG_PATHWAY	hsa04068:FoxO signaling pathway	20	1.33333	0.0280181	PIK3CG, MAP2K1, TGFBR1, SKP2, HOMER1, IL7R, STK4, SIRT1, TGFB1, TGFB2, CCND1, CDKN1A, MAPK13, CCND2, SOS1, MDM2, SETD7, PRKAA2, PIK3R3, KLF2	617	134	6910	1.67155	0.999608	0.145183	31.2656
GOTERM_BP_DIRECT	GO:0071346~cellular response to interferon-gamma	10	0.666667	0.0281454	GBP5, CCL20, CCL21, CD58, CCL19, HLA-DPA1, CCL5, CCL15, CCL18, LGALS9	1286	57	16792	2.2908	1	0.552659	41.5306
GOTERM_BP_DIRECT	GO:0045766~positive regulation of angiogenesis	16	1.06667	0.0291167	CYP1B1, CHI3L1, ITGB2, AQP1, SIRT1, ANXA3, BRCA1, PRKCB, VEGFC, PTGIS, GATA6, ETS1, F3, CCBE1, HIPK2, ANGPTL3	1286	115	16792	1.8167	1	0.562803	42.6192
GOTERM_BP_DIRECT	GO:0030168~platelet activation	16	1.06667	0.0291167	RAP2B, PIK3CG, COL3A1, GAS6, FLNA, PRKCB, DGKA, PRKCQ, VWF, RAC2, LCK, ADRA2A, COL1A2, COL1A1, LCP2, SYK	1286	115	16792	1.8167	1	0.562803	42.6192
GOTERM_BP_DIRECT	GO:0030324~lung development	12	0.8	0.0292985	FGFR2, EIF4EBP1, GPC3, CRISPLD2, CTGF, FOXF1, CCBE1, CHI3L1, HEG1, LOX, SPARC, ADAMTS2	1286	76	16792	2.06172	1	0.56282	42.8209
GOTERM_MF_DIRECT	GO:0004866~endopeptidase inhibitor activity	8	0.533333	0.0293068	C3P1, RECK, A2M, LPA, PZP, SPINT2, CST3, TFPI	1283	40	16881	2.63149	1	0.519784	38.4909
GOTERM_BP_DIRECT	GO:0033365~protein localization to organelle	5	0.333333	0.0295348	BBS2, ANK2, CEP68, CNTLN, RAB3IP	1286	16	16792	4.08048	1	0.563517	43.0821
GOTERM_BP_DIRECT	GO:0000122~negative regulation of transcription from RNA polymerase II promoter	70	4.66667	0.0295715	XPO1, AEBP1, THRB, IMPACT, MITF, WWC1, ZEB2, TGFB1, HEY1, GATA6, GATA3, FOXF1, H2AFY, NR2F2, BHLHE41, SP100, CTBP2, ARID5B, RXRA, ESR1, LEF1, RB1, IFI16, ASCL1, CCND1, DACT1, NCOA2, HIPK2, TGIF1, MDM2, PRDM1, SEMA4D, SMARCA4, FGFR2, GLIS3, ETV7, GLIS2, ARHGAP35, UBE2D3, EZR, TCP10L, PER3, NEDD4L, ETV6, TCF4, RUNX3, KLF5, TXNIP, IKZF1, KLF12, RFX5, HCLS1, KLF11, LMCD1, STAT1, SIRT1, FNIP2, FOXP2, …	1286	720	16792	1.26948	1	0.561733	43.1225
GOTERM_MF_DIRECT	GO:0005516~calmodulin binding	23	1.53333	0.0297144	MYO5A, TRPM4, SLC8A1, ADCY1, AEBP1, CALD1, IQGAP3, RRAD, MYH4, IQGAP2, ITPKB, GEM, TTN, IQGAP1, MYO10, RGS1, RGS4, PDE1A, KCNN2, MAP2, SNTB1, MYH11, MARCKS	1283	189	16881	1.60117	1	0.51814	38.9116
KEGG_PATHWAY	hsa05032:Morphine addiction	15	1	0.0297446	GABRE, ADCY1, GNAO1, ADCY7, GABRB3, GABBR1, PDE11A, PDE4D, KCNJ3, PRKCB, PDE7A, PDE1A, GNAS, GRK5, GABRP	617	91	6910	1.84605	0.99976	0.15076	32.859
KEGG_PATHWAY	hsa05169:Epstein-Barr virus infection	26	1.73333	0.0303503	XPO1, VIM, CD44, HSPA2, IL10RA, BCL2, PIK3R3, ENTPD1, TRAF5, SYK, PIK3CG, SKP2, HLA-A, HLA-C, RB1, HLA-B, HLA-E, HLA-G, HLA-F, DDX58, CDKN1A, MAPK13, CD58, MDM2, JAK3, EIF2AK2	617	190	6910	1.53254	0.999798	0.150906	33.4099
GOTERM_BP_DIRECT	GO:0043124~negative regulation of I-kappaB kinase/NF-kappaB signaling	8	0.533333	0.0303903	NLRC3, CASP8, PYCARD, ESR1, STAT1, SIRT1, GSTP1, RHOH	1286	40	16792	2.61151	1	0.569549	44.0179
GOTERM_BP_DIRECT	GO:0045184~establishment of protein localization	8	0.533333	0.0303903	ANK3, DZIP1, NPNT, MDM2, ITGA2, MCC, RDX, FLNA	1286	40	16792	2.61151	1	0.569549	44.0179
GOTERM_MF_DIRECT	GO:0030674~protein binding, bridging	12	0.8	0.0304076	TRIM5, FLRT2, COL14A1, ANK2, ANK3, ANXA1, WWC1, COL1A2, CSTA, CNTLN, TRIM22, NMD3	1283	77	16881	2.05051	1	0.519923	39.6207
GOTERM_MF_DIRECT	GO:0042802~identical protein binding	72	4.8	0.0304806	S100A4, LDHB, CLDN7, IER5, SAT2, TTN, LZTFL1, BBOX1, TRIM5, TMEM173, ROBO1, CASP8, FAS, NQO1, PTPRM, SP100, GBP5, CRYAB, VIL1, CST3, ESR1, LYZ, SKP2, RB1, PFKM, STK4, SLIT2, HSPB8, LCK, COL1A2, MDM2, CTSC, COL1A1, RNF135, GBP1, ALDOA, BCAT1, SORD, HSD17B14, VIM, CD247, CLDN10, CLDN11, CD74, PBLD, TCP10L, BCHE, ALB, BCL2, PYCARD, TCF4, TRAF5, TYROBP, SHMT2, CAP2, DPYSL2, STAT1, MID1, SIRT1, ANXA4,…	1283	749	16881	1.2648	1	0.514445	39.6949
GOTERM_CC_DIRECT	GO:0051286~cell tip	3	0.2	0.0307584	EZR, RAB8B, RDX	1375	4	18224	9.94036	1	0.282839	36.7138
GOTERM_CC_DIRECT	GO:0005862~muscle thin filament tropomyosin	3	0.2	0.0307584	TPM2, TPM1, TPM4	1375	4	18224	9.94036	1	0.282839	36.7138
GOTERM_BP_DIRECT	GO:0006661~phosphatidylinositol biosynthetic process	10	0.666667	0.0311363	PIK3CG, SH3YL1, PIK3C2G, INPP5F, INPP4B, INPP5D, INPP4A, PIP4K2A, CDS1, PIK3R3	1286	58	16792	2.2513	1	0.576277	44.822
GOTERM_MF_DIRECT	GO:0019834~phospholipase A2 inhibitor activity	3	0.2	0.0311824	ANXA1, ANXA3, ANXA2	1283	4	16881	9.86808	1	0.516349	40.4042
GOTERM_MF_DIRECT	GO:0031852~mu-type opioid receptor binding	3	0.2	0.0311824	GNAO1, GNAS, FLNA	1283	4	16881	9.86808	1	0.516349	40.4042
GOTERM_MF_DIRECT	GO:0034597~phosphatidylinositol-4,5-bisphosphate 4-phosphatase activity	3	0.2	0.0311824	INPP4B, INPP4A, TMEM55A	1283	4	16881	9.86808	1	0.516349	40.4042
GOTERM_MF_DIRECT	GO:0046978~TAP1 binding	3	0.2	0.0311824	TAP2, TAP1, HLA-F	1283	4	16881	9.86808	1	0.516349	40.4042
GOTERM_BP_DIRECT	GO:2000483~negative regulation of interleukin-8 secretion	3	0.2	0.0316359	ANXA1, PTPN22, ANXA4	1286	4	16792	9.79316	1	0.579953	45.3544
GOTERM_BP_DIRECT	GO:0030947~regulation of vascular endothelial growth factor receptor signaling pathway	3	0.2	0.0316359	VEGFC, TMEM204, MYOF	1286	4	16792	9.79316	1	0.579953	45.3544
GOTERM_BP_DIRECT	GO:0006564~L-serine biosynthetic process	3	0.2	0.0316359	SHMT2, PHGDH, PSAT1	1286	4	16792	9.79316	1	0.579953	45.3544
GOTERM_BP_DIRECT	GO:1901164~negative regulation of trophoblast cell migration	3	0.2	0.0316359	ACVR1C, TIMP1, ARHGDIB	1286	4	16792	9.79316	1	0.579953	45.3544
GOTERM_BP_DIRECT	GO:0030950~establishment or maintenance of actin cytoskeleton polarity	3	0.2	0.0316359	MAPKAP1, ARHGAP35, AQP1	1286	4	16792	9.79316	1	0.579953	45.3544
GOTERM_BP_DIRECT	GO:0010716~negative regulation of extracellular matrix disassembly	3	0.2	0.0316359	FAP, CST3, TGFB1	1286	4	16792	9.79316	1	0.579953	45.3544
GOTERM_CC_DIRECT	GO:0030018~Z disc	16	1.06667	0.0318344	SLC8A1, CRYAB, SYNPO2, TTN, PALLD, NEXN, HOMER1, FKBP1B, FLNA, MYL9, KRT19, ANK2, ANK3, CFL2, KRT8, KCNN2	1375	118	18224	1.79713	1	0.286733	37.7349
KEGG_PATHWAY	hsa05161:Hepatitis B	21	1.4	0.032028	PIK3CG, IFIH1, E2F3, MAP2K1, TGFBR1, RB1, STAT1, TGFB1, PRKCB, IFNAR1, STAT2, TGFB2, DDX58, CDKN1A, CCND1, BCL2, IRF7, MAP3K1, CASP8, FAS, PIK3R3	617	145	6910	1.62198	0.999875	0.155927	34.914
GOTERM_BP_DIRECT	GO:0001974~blood vessel remodeling	7	0.466667	0.0322205	LIF, BGN, CCR2, MDM2, SEMA3C, JAG1, TGFB2	1286	32	16792	2.85634	1	0.584536	45.9713
GOTERM_CC_DIRECT	GO:1903561~extracellular vesicle	9	0.6	0.0322698	PKM, C8B, SERPINE2, SLC12A2, EFEMP2, COL6A3, COL6A2, ITGB2, PRELP	1375	50	18224	2.38569	1	0.28564	38.1437
GOTERM_BP_DIRECT	GO:0010629~negative regulation of gene expression	18	1.2	0.0325047	MAP2K1, CRYAB, CD3E, IQGAP3, ESR1, PTPN22, RB1, GPER1, ACACB, SIRT1, LGALS9, SFMBT2, TGFB1, TGFB2, BBS2, CDKN1A, CTGF, ITGB8	1286	137	16792	1.71559	1	0.585602	46.2687
GOTERM_BP_DIRECT	GO:0034341~response to interferon-gamma	6	0.4	0.0325748	CD86, SP100, BST2, IFITM1, NUB1, TRIM21	1286	24	16792	3.26439	1	0.584223	46.3419
GOTERM_BP_DIRECT	GO:0030511~positive regulation of transforming growth factor beta receptor signaling pathway	6	0.4	0.0325748	CDKN1C, DAB2, NPNT, HIPK2, TGFBR3, TGFB1I1	1286	24	16792	3.26439	1	0.584223	46.3419
GOTERM_MF_DIRECT	GO:0005215~transporter activity	24	1.6	0.0333417	RBP5, FXYD2, XPO1, RBP1, SLC16A10, TTPA, ABCB1, AQP1, AQP3, ABCA6, ABCG2, ABCA5, TTPAL, ABCC9, SLCO1A2, PTGDS, TAP2, TAP1, ABCC1, SLCO3A1, SLC51B, SLC51A, STEAP1, FLVCR1	1283	202	16881	1.56326	1	0.53427	42.5377
KEGG_PATHWAY	hsa04666:Fc gamma R-mediated phagocytosis	14	0.933333	0.0339313	PIK3CG, PTPRC, MAP2K1, PRKCB, ARPC1B, MYO10, DOCK2, RAC2, GSN, CFL2, MARCKS, INPP5D, PIK3R3, SYK	617	84	6910	1.86656	0.999927	0.161748	36.5822
GOTERM_BP_DIRECT	GO:0030097~hemopoiesis	10	0.666667	0.0343412	ZFP36L2, CRIP2, LCK, DLL1, JAG1, IFI16, KIT, RUNX2, RUNX3, TGFB2	1286	59	16792	2.21314	1	0.601703	48.154
GOTERM_BP_DIRECT	GO:0043406~positive regulation of MAP kinase activity	10	0.666667	0.0343412	PIK3CG, PDGFA, RASGRP1, ADRA2A, PDGFD, KIT, CD24, HTR2B, TGFB1, IQGAP1	1286	59	16792	2.21314	1	0.601703	48.154
GOTERM_BP_DIRECT	GO:0007411~axon guidance	20	1.33333	0.0349291	FLRT2, ENAH, NRXN3, NFASC, ARHGAP35, NEO1, DPYSL2, SLIT2, TGFB2, LAMA2, PRKCQ, EZR, ROBO1, ANK3, SOS1, TENM2, GATA3, SEMA3C, B3GNT2, LGI1	1286	159	16792	1.64246	1	0.605876	48.7441
GOTERM_MF_DIRECT	GO:0004180~carboxypeptidase activity	5	0.333333	0.0354729	AEBP1, CPE, CNDP1, ACE2, CTSA	1283	17	16881	3.86984	1	0.550712	44.5729
GOTERM_BP_DIRECT	GO:0060411~cardiac septum morphogenesis	4	0.266667	0.0356965	HEY1, MDM2, JAG1, BMP5	1286	10	16792	5.22302	1	0.611846	49.5048
GOTERM_BP_DIRECT	GO:0002218~activation of innate immune response	4	0.266667	0.0356965	TRIM5, TMEM173, PYCARD, IFI16	1286	10	16792	5.22302	1	0.611846	49.5048
GOTERM_BP_DIRECT	GO:0010737~protein kinase A signaling	4	0.266667	0.0356965	EZR, FBN1, RDX, MROH2B	1286	10	16792	5.22302	1	0.611846	49.5048
GOTERM_BP_DIRECT	GO:0060174~limb bud formation	4	0.266667	0.0356965	FGFR2, SOX4, SEMA3C, SOX9	1286	10	16792	5.22302	1	0.611846	49.5048
GOTERM_BP_DIRECT	GO:0060674~placenta blood vessel development	4	0.266667	0.0356965	MAP2K1, ITGB8, SPINT1, NR2F2	1286	10	16792	5.22302	1	0.611846	49.5048
GOTERM_BP_DIRECT	GO:0042981~regulation of apoptotic process	25	1.66667	0.0362919	TNFRSF21, MITF, BEX2, SOX9, TGFB1, CASP8, NDRG1, FAS, CASP1, TRAF5, CD3E, SKP2, ESR1, GAS1, CARD6, STAT1, BRCA1, TNFRSF10A, RASSF3, CARD16, ETS1, INHBC, GDF15, EIF2AK2, BMP5	1286	213	16792	1.53258	1	0.615895	50.0876
GOTERM_BP_DIRECT	GO:0048514~blood vessel morphogenesis	5	0.333333	0.036346	COL4A1, CYP1B1, SOS1, NR2F2, SYK	1286	17	16792	3.84045	1	0.614323	50.1404
GOTERM_BP_DIRECT	GO:1902041~regulation of extrinsic apoptotic signaling pathway via death domain receptors	5	0.333333	0.036346	TNFRSF10A, SP100, LGALS3, CASP8, FAS	1286	17	16792	3.84045	1	0.614323	50.1404
GOTERM_BP_DIRECT	GO:0010634~positive regulation of epithelial cell migration	7	0.466667	0.03692	ENPP2, VIL1, EPB41L5, ITGA2, RAB25, SOX9, TGFB2	1286	33	16792	2.76978	1	0.618072	50.6957
GOTERM_BP_DIRECT	GO:0048661~positive regulation of smooth muscle cell proliferation	10	0.666667	0.0377662	FGFR2, CYBA, IL18, AKR1B1, SKP2, ABCC4, ITGA2, PDGFD, CCL5, STAT1	1286	60	16792	2.17626	1	0.624457	51.5036
GOTERM_MF_DIRECT	GO:0001618~virus receptor activity	11	0.733333	0.0379303	F11R, LAMP1, CD86, HLA-DRB1, CCR5, CXCR4, ITGAV, CLEC4G, ACE2, ITGA2, CLEC4M	1283	70	16881	2.0676	1	0.569292	46.8356
GOTERM_BP_DIRECT	GO:0060135~maternal process involved in female pregnancy	6	0.4	0.0382364	APOL2, IFI27, ADCY7, AKR1B1, MMP7, LGALS9	1286	25	16792	3.13381	1	0.627003	51.9472
GOTERM_BP_DIRECT	GO:0007565~female pregnancy	13	0.866667	0.0382667	PZP, ITGA2, TGFB1, LGALS9, LNPEP, THBD, UCP2, ETS1, BCL2, DHODH, GNAS, SLC38A1, HPGD	1286	89	16792	1.90728	1	0.625216	51.9756
GOTERM_BP_DIRECT	GO:0002548~monocyte chemotaxis	8	0.533333	0.038558	LGALS3, CCL20, CCL21, ANXA1, CCL19, CCL5, CCL15, CCL18	1286	42	16792	2.48715	1	0.625989	52.2484
GOTERM_BP_DIRECT	GO:0019722~calcium-mediated signaling	9	0.6	0.0386232	TRPM4, PPP1R9A, CCR5, CXCR4, AVPR1A, HTR2B, RCAN3, SELE, MCTP1	1286	51	16792	2.30427	1	0.624561	52.3092
GOTERM_MF_DIRECT	GO:0008233~peptidase activity	13	0.866667	0.0392308	MASP2, PPP2R5C, APH1B, PAPLN, TMPRSS3, FOLH1, FAP, CASP8, MYRF, STAMBPL1, FGL2, MPND, PCSK5	1283	90	16881	1.90052	1	0.575779	47.9978
GOTERM_BP_DIRECT	GO:0001666~response to hypoxia	21	1.4	0.0398184	PLAT, CRYAB, CST3, EGLN3, ITGA2, CAPN2, MMP2, TGFB1, PRKCB, TGFB2, PKM, CYBA, VEGFC, CXCR4, ETS1, UCP2, ABAT, TGFBR3, CYGB, CD24, CASP1	1286	172	16792	1.59423	1	0.63395	53.4115
GOTERM_MF_DIRECT	GO:0001540~beta-amyloid binding	7	0.466667	0.0407279	BCHE, BACE2, CLSTN1, CST3, CD74, TGFB2, ITM2A	1283	34	16881	2.70889	1	0.583781	49.306
GOTERM_BP_DIRECT	GO:0031175~neuron projection development	14	0.933333	0.0412518	MICALL2, EFHD1, PPP1R9A, NRTN, GNAO1, PTPRM, STMN3, MAP2, PHGDH, CDH1, RB1, LAMB1, LGI1, HDGFRP3	1286	100	16792	1.82806	1	0.645193	54.7017
KEGG_PATHWAY	hsa04650:Natural killer cell mediated cytotoxicity	18	1.2	0.0419843	PIK3CG, MAP2K1, ICAM2, CD247, ITGB2, PRKCB, IFNAR1, TNFRSF10A, CD48, SH2D1A, RAC2, SOS1, LCK, FAS, PIK3R3, SYK, TYROBP, LCP2	617	122	6910	1.65236	0.999993	0.193649	43.213
GOTERM_BP_DIRECT	GO:0048286~lung alveolus development	7	0.466667	0.042036	LIF, FGFR2, MAN1A2, PDGFA, FOXF1, PKDCC, FOXP2	1286	34	16792	2.68832	1	0.650238	55.3931
GOTERM_BP_DIRECT	GO:0050919~negative chemotaxis	7	0.466667	0.042036	FLRT2, SEMA3G, PDGFA, ITGAV, SEMA3C, SEMA4D, SLIT2	1286	34	16792	2.68832	1	0.650238	55.3931
GOTERM_MF_DIRECT	GO:0005539~glycosaminoglycan binding	5	0.333333	0.042948	BGN, SERPINE2, TGFBR3, VCAN, DCN	1283	18	16881	3.65485	1	0.597757	51.1892
GOTERM_MF_DIRECT	GO:0005520~insulin-like growth factor binding	5	0.333333	0.042948	WISP1, CTGF, IGFBP7, IGFALS, CRIM1	1283	18	16881	3.65485	1	0.597757	51.1892
GOTERM_BP_DIRECT	GO:0008202~steroid metabolic process	8	0.533333	0.0431325	AKR1C4, CYP1B1, CYP3A7, CYP2C19, SULT1B1, AKR1B10, SULT1E1, UGT1A1	1286	43	16792	2.42931	1	0.65789	56.3431
GOTERM_MF_DIRECT	GO:0050840~extracellular matrix binding	6	0.4	0.0432427	BGN, ITGAV, TGFBI, DCN, SPARC, SPP1	1283	26	16881	3.03633	1	0.594551	51.4343
GOTERM_CC_DIRECT	GO:0019898~extrinsic component of membrane	12	0.8	0.0434259	EPB41L3, EZR, PTPN3, VPS13C, EPB41L5, ANXA1, EPB41L4A, GFRA1, STK39, RDX, EPB41L4B, MYLIP	1375	82	18224	1.93958	1	0.360546	47.8036
GOTERM_MF_DIRECT	GO:0050839~cell adhesion molecule binding	10	0.666667	0.0434944	CLDN7, PTPRD, EZR, CPE, NRXN3, TENM2, CDH1, ITGB2, ITGA4, CD200	1283	62	16881	2.12217	1	0.591049	51.6425
GOTERM_CC_DIRECT	GO:0005737~cytoplasm	423	28.2	0.0436792	CTHRC1, LDHB, RANGAP1, ISG20, WDR72, FAP, PPP1R1A, FAS, SYK, PIK3CG, PTPRM, TNIK, CRYAB, LRRC1, SKP2, DCDC2, DCDC1, CTNNA3, PTRF, TAGLN, SSTR1, SPAG4, EIF2AK2, GRB14, PLCXD3, RTP4, RALGPS1, TPGS2, RAC2, FAM213A, FAIM, CDC42EP3, CDC42EP5, PTGR1, MAP2K1, KLF12, FAM213B, GAS6, FNIP2, APOL3, HEBP2, RGS4, MAP2, TGFBR3, SMURF2, SYTL2, GAS2L3, LXN, GPR88, PKM, MICAL1, MAGEH1, AR, ARHGEF18, CFTR, ELMO2, …	1375	5222	18224	1.0736	1	0.357197	48.0056
GOTERM_BP_DIRECT	GO:0010596~negative regulation of endothelial cell migration	5	0.333333	0.0439852	SP100, PTPRM, DCN, NR2F2, SLIT2	1286	18	16792	3.6271	1	0.663234	57.0687
GOTERM_BP_DIRECT	GO:0033280~response to vitamin D	5	0.333333	0.0439852	ALPL, TGFB1, AQP3, SPP1, CXCL10	1286	18	16792	3.6271	1	0.663234	57.0687
GOTERM_BP_DIRECT	GO:0045807~positive regulation of endocytosis	5	0.333333	0.0439852	DAB2, GPC3, CCL19, DLL1, NEDD4L	1286	18	16792	3.6271	1	0.663234	57.0687
GOTERM_BP_DIRECT	GO:0002690~positive regulation of leukocyte chemotaxis	5	0.333333	0.0439852	F2RL1, CXCL9, CXCL6, CXCL11, CXCL10	1286	18	16792	3.6271	1	0.663234	57.0687
GOTERM_MF_DIRECT	GO:0019904~protein domain specific binding	24	1.6	0.0442872	RAP2B, XPO1, DDC, SP100, STMN3, NFASC, RDX, MPP7, IQGAP1, LAMP1, PPP1R9A, EZR, GSN, CEP68, EPB41L5, KCNN2, CAPG, ID3, CNTLN, ETV6, TBL1X, TUBA1A, RUNX2, TFDP1	1283	208	16881	1.51817	1	0.592223	52.2933
GOTERM_BP_DIRECT	GO:0002053~positive regulation of mesenchymal cell proliferation	6	0.4	0.0444618	FGFR2, PDGFA, FOXF1, STAT1, SOX9, FOXP2	1286	26	16792	3.01328	1	0.665288	57.4693
GOTERM_BP_DIRECT	GO:0008652~cellular amino acid biosynthetic process	6	0.4	0.0444618	BCAT1, FOLH1, FOLH1B, GLS, ASPG, CBS	1286	26	16792	3.01328	1	0.665288	57.4693
GOTERM_BP_DIRECT	GO:0060395~SMAD protein signal transduction	10	0.666667	0.0452976	LNPEP, SMAD9, NCEH1, VIM, HIPK2, INHBC, GDF15, TGFB1, BMP5, TGFB2	1286	62	16792	2.10606	1	0.670291	58.1632
GOTERM_BP_DIRECT	GO:0016525~negative regulation of angiogenesis	10	0.666667	0.0452976	COL4A3, COL4A2, PTPRM, CCR2, DCN, SPARC, TCF4, STAT1, THBS2, CXCL10	1286	62	16792	2.10606	1	0.670291	58.1632
GOTERM_BP_DIRECT	GO:0006968~cellular defense response	10	0.666667	0.0452976	ITK, LGALS3BP, SH2D1A, CCR5, CCR2, CXCL9, DCDC2, TRAT1, HLA-G, TYROBP	1286	62	16792	2.10606	1	0.670291	58.1632
GOTERM_MF_DIRECT	GO:0004702~receptor signaling protein serine/threonine kinase activity	9	0.6	0.0453325	TNIK, MAP2K1, STK24, TGFBR1, MAP3K1, STK39, STK4, ACVR1C, TGFB2	1283	53	16881	2.23428	1	0.595456	53.1387
GOTERM_MF_DIRECT	GO:0016814~hydrolase activity, acting on carbon-nitrogen (but not peptide) bonds, in cyclic amidines	4	0.266667	0.0454677	APOBEC3B, APOBEC3G, APOBEC3F, APOBEC3C	1283	11	16881	4.78452	1	0.59115	53.247
GOTERM_MF_DIRECT	GO:0043225~anion transmembrane-transporting ATPase activity	4	0.266667	0.0454677	ABCC9, ABCC4, ABCC1, CFTR	1283	11	16881	4.78452	1	0.59115	53.247
GOTERM_BP_DIRECT	GO:0016064~immunoglobulin mediated immune response	4	0.266667	0.0463536	IRF7, INPP5D, CD74, CD27	1286	11	16792	4.7482	1	0.676953	59.0245
GOTERM_BP_DIRECT	GO:1901653~cellular response to peptide	4	0.266667	0.0463536	KLF5, KLF11, AKR1B1, KLF2	1286	11	16792	4.7482	1	0.676953	59.0245
GOTERM_BP_DIRECT	GO:0050868~negative regulation of T cell activation	4	0.266667	0.0463536	VTCN1, PTPN22, JAK3, PAG1	1286	11	16792	4.7482	1	0.676953	59.0245
GOTERM_BP_DIRECT	GO:0007016~cytoskeletal anchoring at plasma membrane	4	0.266667	0.0463536	EPB41L3, EZR, TLN2, ANK3	1286	11	16792	4.7482	1	0.676953	59.0245
GOTERM_BP_DIRECT	GO:0019674~NAD metabolic process	4	0.266667	0.0463536	GPD1L, NADK2, LDHB, QPRT	1286	11	16792	4.7482	1	0.676953	59.0245
GOTERM_BP_DIRECT	GO:0097202~activation of cysteine-type endopeptidase activity	4	0.266667	0.0463536	CASP8, PYCARD, IFI16, ASPH	1286	11	16792	4.7482	1	0.676953	59.0245
GOTERM_CC_DIRECT	GO:0000139~Golgi membrane	57	3.8	0.0463559	SLC9A7, CLSTN2, PDGFA, CLSTN1, MALL, ST3GAL6, CHST11, PDGFD, BSG, PARM1, GBP5, MAN1A2, HLA-A, HLA-C, CHST4, MAN1A1, GPER1, HLA-B, HLA-E, CHPT1, HLA-G, HLA-DQA1, HLA-F, CHST9, ZDHHC13, HLA-DPA1, CTSC, GBP4, GBP3, GBP2, PMEPA1, HLA-DRA, GBP1, GALNT3, HLA-DQB1, GALNT7, HLA-DRB1, FUT8, CYTH2, LMAN1, CD74, ABCA5, GNPTAB, TMED3, RASGRP1, SLC35B4, MANEA, FUT4, B3GNT2, HLA-DPB1, CD1E, GIMAP1, C3ORF58, CD…	1375	591	18224	1.27829	1	0.369696	50.0965
GOTERM_BP_DIRECT	GO:0007015~actin filament organization	11	0.733333	0.0467765	ALDOA, NCK2, PPP1R9A, CORO1A, RAC2, FAT1, BCL2, TMSB10, TPM2, TPM1, TPM4	1286	72	16792	1.9949	1	0.678402	59.3648
GOTERM_BP_DIRECT	GO:0006898~receptor-mediated endocytosis	22	1.46667	0.0469024	TMPRSS2, IGLV1-44, ENPP1, PRG4, ENPP2, IGKV1-17, ENPP3, SUSD2, RABEPK, PPT1, COLEC11, SPARC, HPR, TMPRSS3, CD163, LGALS3BP, DAB2, ALB, IGHA1, LOXL4, IGKC, IGLC1	1286	186	16792	1.54444	1	0.677471	59.4655
GOTERM_BP_DIRECT	GO:0050731~positive regulation of peptidyl-tyrosine phosphorylation	12	0.8	0.0474555	LIF, VEGFC, CD44, CD3E, ENPP2, HCLS1, SEMA4D, TGFB1, CD74, GHR, EHD4, SYK	1286	82	16792	1.91086	1	0.679927	59.9055
GOTERM_BP_DIRECT	GO:0009887~organ morphogenesis	13	0.866667	0.0475545	FGFR2, VEGFC, ETV7, FLI1, THRB, PDGFA, GMNN, GATA3, ITGA2, GAMT, DCN, BHLHE41, SYK	1286	92	16792	1.84509	1	0.678792	59.9837
GOTERM_BP_DIRECT	GO:0050918~positive chemotaxis	7	0.466667	0.0475762	VEGFC, CORO1A, LGALS3, MET, CCL5, GPNMB, CCL15	1286	35	16792	2.61151	1	0.677057	60.0008
GOTERM_BP_DIRECT	GO:0043434~response to peptide hormone	8	0.533333	0.048043	BSG, CTGF, ANXA1, COL1A1, SRD5A2, SPARC, STAT1, TIMP1	1286	44	16792	2.3741	1	0.678813	60.3678
KEGG_PATHWAY	hsa04668:TNF signaling pathway	16	1.06667	0.0480616	CXCL1, PIK3CG, MAP2K1, CXCL2, CCL5, CXCL10, LIF, CCL20, MAPK13, CASP8, MLKL, FAS, ITCH, PIK3R3, SELE, TRAF5	617	106	6910	1.69047	0.999999	0.215537	47.786
KEGG_PATHWAY	hsa04614:Renin-angiotensin system	6	0.4	0.0483849	LNPEP, THOP1, ACE2, MME, CPA3, CTSA	617	23	6910	2.92157	0.999999	0.213484	48.0195
GOTERM_CC_DIRECT	GO:0042105~alpha-beta T cell receptor complex	3	0.2	0.0487247	CD3D, CD3E, CD247	1375	5	18224	7.95229	1	0.379671	51.8814
GOTERM_CC_DIRECT	GO:0043657~host cell	3	0.2	0.0487247	IFIT1, TAP2, TAP1	1375	5	18224	7.95229	1	0.379671	51.8814
GOTERM_CC_DIRECT	GO:0033010~paranodal junction	3	0.2	0.0487247	AKR1B1, NFASC, JAM3	1375	5	18224	7.95229	1	0.379671	51.8814
GOTERM_MF_DIRECT	GO:0004528~phosphodiesterase I activity	3	0.2	0.0493782	ENPP1, ENPP2, ENPP3	1283	5	16881	7.89447	1	0.616802	56.2799
GOTERM_MF_DIRECT	GO:0004551~nucleotide diphosphatase activity	3	0.2	0.0493782	ENPP1, ENPP2, ENPP3	1283	5	16881	7.89447	1	0.616802	56.2799
GOTERM_MF_DIRECT	GO:0048248~CXCR3 chemokine receptor binding	3	0.2	0.0493782	CXCL9, CXCL11, CXCL10	1283	5	16881	7.89447	1	0.616802	56.2799
GOTERM_MF_DIRECT	GO:0030284~estrogen receptor activity	3	0.2	0.0493782	ESR1, LEF1, GPER1	1283	5	16881	7.89447	1	0.616802	56.2799
GOTERM_MF_DIRECT	GO:0016641~oxidoreductase activity, acting on the CH-NH2 group of donors, oxygen as acceptor	3	0.2	0.0493782	LOXL4, LOX, LOXL1	1283	5	16881	7.89447	1	0.616802	56.2799
GOTERM_BP_DIRECT	GO:0002479~antigen processing and presentation of exogenous peptide antigen via MHC class I, TAP-dependent	10	0.666667	0.0494138	CYBA, ITGAV, HLA-A, HLA-C, HLA-B, HLA-E, PSMB8, HLA-G, PSMB9, HLA-F	1286	63	16792	2.07263	1	0.687436	61.4269
GOTERM_CC_DIRECT	GO:0043231~intracellular membrane-bounded organelle	54	3.6	0.0495812	XPO1, CYP2C19, RANGAP1, ACBD5, DAB2, CYP39A1, DAB1, EVI5, CTGF, PARM1, ACKR3, CTSS, GRHL1, CHPT1, ARHGAP30, CD86, RAB11FIP3, ZDHHC13, SPATA18, GRN, VCAN, RAB11FIP1, PMEPA1, GRB14, FGFR2, FXYD2, CYP1B1, OAS3, IFI30, RABEPK, AKAP9, CTSA, ELK3, OAS2, GPRC5B, ABCA6, ABCA5, PLAGL1, POLE2, TRIM69, UGT2A1, UGT2A3, COL8A1, MYOF, KLF5, COL4A3, COL4A2, PODXL, ATP11A, SFMBT2, PROM1, RABEP2, SAMD9, SYT13	1375	558	18224	1.28263	1	0.379987	52.512
GOTERM_BP_DIRECT	GO:0050819~negative regulation of coagulation	3	0.2	0.0500765	PROCR, ANXA5, ANXA4	1286	5	16792	7.83453	1	0.690533	61.9293
GOTERM_BP_DIRECT	GO:0019060~intracellular transport of viral protein in host cell	3	0.2	0.0500765	IFIT1, TAP2, TAP1	1286	5	16792	7.83453	1	0.690533	61.9293
GOTERM_BP_DIRECT	GO:2000566~positive regulation of CD8-positive, alpha-beta T cell proliferation	3	0.2	0.0500765	HLA-A, PTPN22, HLA-E	1286	5	16792	7.83453	1	0.690533	61.9293
GOTERM_BP_DIRECT	GO:0010936~negative regulation of macrophage cytokine production	3	0.2	0.0500765	IRAK3, TGFB1, TGFB2	1286	5	16792	7.83453	1	0.690533	61.9293
GOTERM_BP_DIRECT	GO:0071504~cellular response to heparin	3	0.2	0.0500765	SOX9, AOC1, SLIT2	1286	5	16792	7.83453	1	0.690533	61.9293
GOTERM_BP_DIRECT	GO:0072602~interleukin-4 secretion	3	0.2	0.0500765	VTCN1, GATA3, IL1RAP	1286	5	16792	7.83453	1	0.690533	61.9293
GOTERM_BP_DIRECT	GO:0033591~response to L-ascorbic acid	3	0.2	0.0500765	ITGA2, SPARC, GSTP1	1286	5	16792	7.83453	1	0.690533	61.9293
GOTERM_BP_DIRECT	GO:0051220~cytoplasmic sequestering of protein	3	0.2	0.0500765	GET4, DZIP1, FLNA	1286	5	16792	7.83453	1	0.690533	61.9293
GOTERM_BP_DIRECT	GO:0032264~IMP salvage	3	0.2	0.0500765	PRTFDC1, AMPD3, AMPD1	1286	5	16792	7.83453	1	0.690533	61.9293
GOTERM_BP_DIRECT	GO:0070100~negative regulation of chemokine-mediated signaling pathway	3	0.2	0.0500765	ROBO1, CCL5, SLIT2	1286	5	16792	7.83453	1	0.690533	61.9293
GOTERM_BP_DIRECT	GO:0001915~negative regulation of T cell mediated cytotoxicity	3	0.2	0.0500765	PTPRC, IL7R, CEACAM1	1286	5	16792	7.83453	1	0.690533	61.9293
GOTERM_BP_DIRECT	GO:2001300~lipoxin metabolic process	3	0.2	0.0500765	ALOX5AP, ALOX5, HPGD	1286	5	16792	7.83453	1	0.690533	61.9293
GOTERM_CC_DIRECT	GO:0043034~costamere	5	0.333333	0.0501149	KRT19, ANK2, ANK3, KRT8, HOMER1	1375	19	18224	3.48785	1	0.378346	52.901
GOTERM_CC_DIRECT	GO:0042571~immunoglobulin complex, circulating	5	0.333333	0.0501149	IGHG1, IGHD, IGKC, IGLL5, IGLC1	1375	19	18224	3.48785	1	0.378346	52.901
GOTERM_BP_DIRECT	GO:0051056~regulation of small GTPase mediated signal transduction	17	1.13333	0.0501563	ARHGEF3, A2M, ARHGEF18, AKAP13, ARHGAP18, ARHGAP35, RACGAP1, ARHGAP30, TAGAP, RAC2, SOS1, ARAP2, ARHGDIB, ARHGAP10, FGD4, KALRN, RHOH	1286	134	16792	1.65655	1	0.689269	61.9894
GOTERM_CC_DIRECT	GO:0016324~apical plasma membrane	31	2.06667	0.0503608	PKHD1, RDX, JAG1, AQP1, EPCAM, EZR, ANK2, RAPGEF6, SLC4A7, NPC1L1, MTCL1, STK39, MUC13, CEACAM1, TNIK, SLC12A2, BST2, PODXL, ARHGEF18, ANXA1, CFTR, ABCB1, DLL1, PDE4D, PFKM, THY1, PROM1, CYBA, ANXA13, AKAP7, GNAS	1375	291	18224	1.41192	1	0.375035	53.0792
KEGG_PATHWAY	hsa05322:Systemic lupus erythematosus	19	1.26667	0.0505173	HLA-DQB1, C7, HLA-DRB1, HLA-DMB, HLA-DMA, C1QC, HLA-DQA1, TRIM21, C1QA, C8A, C8B, C1QB, CD86, H2AFY, HLA-DPA1, HLA-DPB1, HLA-DOA, HLA-DOB, HLA-DRA	617	134	6910	1.58797	0.999999	0.218607	49.5354
GOTERM_BP_DIRECT	GO:0050729~positive regulation of inflammatory response	11	0.733333	0.0506478	CD47, PTGER4, MAPK13, ETS1, IL18, CCR2, ITGA2, CCL5, GPRC5B, CCL15, CCL18	1286	73	16792	1.96757	1	0.691055	62.3574
GOTERM_BP_DIRECT	GO:0009791~post-embryonic development	11	0.733333	0.0506478	FGFR2, ATF5, TGFBR1, BCL2, GATA3, ARID5B, CHST11, HEG1, SEMA3C, PRDM1, FOXP2	1286	73	16792	1.96757	1	0.691055	62.3574
GOTERM_BP_DIRECT	GO:0006919~activation of cysteine-type endopeptidase activity involved in apoptotic process	12	0.8	0.0510907	TNFRSF10A, COL4A3, IFI27, ROBO1, F3, CASP8, LCK, PYCARD, EGLN3, FAS, CASP1, PDCD2	1286	83	16792	1.88784	1	0.69246	62.6861
GOTERM_MF_DIRECT	GO:0001965~G-protein alpha-subunit binding	5	0.333333	0.0512383	RGS10, RGS1, RGS4, F2RL1, HTR2B	1283	19	16881	3.46249	1	0.625466	57.6569
GOTERM_MF_DIRECT	GO:0051018~protein kinase A binding	5	0.333333	0.0512383	MYRIP, DACT1, AKAP13, AKAP7, RDX	1283	19	16881	3.46249	1	0.625466	57.6569
GOTERM_BP_DIRECT	GO:0051281~positive regulation of release of sequestered calcium ion into cytosol	6	0.4	0.0512575	TRPC1, CXCL9, GPER1, CXCL11, CXCL10, THY1	1286	27	16792	2.90168	1	0.691847	62.8092
GOTERM_BP_DIRECT	GO:0032728~positive regulation of interferon-beta production	6	0.4	0.0512575	DDX58, IFIH1, ZC3HAV1, IRF7, RNF135, IFNAR1	1286	27	16792	2.90168	1	0.691847	62.8092
KEGG_PATHWAY	hsa04750:Inflammatory mediator regulation of TRP channels	15	1	0.0513576	PIK3CG, ADCY1, TRPM8, PTGER4, ADCY7, F2RL1, PPP1CB, PRKCB, PRKCQ, MAPK13, IL1RAP, GNAS, PIK3R3, PLA2G4C, HTR2B	617	98	6910	1.71419	1	0.218577	50.1215
KEGG_PATHWAY	hsa04144:Endocytosis	32	2.13333	0.0518196	FGFR2, CYTH2, KIT, TGFB1, TGFB2, DAB2, HSPA2, CXCR4, IL2RG, ITCH, WIPF1, NEDD4L, EHD4, TGFBR1, MET, HLA-A, HLA-C, HLA-B, HLA-E, HLA-G, HLA-F, ARPC1B, CBLB, RAB31, RAB11FIP3, CCR5, PDGFRA, MDM2, SMURF2, GRK5, ARAP2, RAB11FIP1	617	258	6910	1.38907	1	0.217114	50.441
GOTERM_MF_DIRECT	GO:0004896~cytokine receptor activity	7	0.466667	0.0519292	CD44, F3, IL2RG, IL7R, CSF2RA, CD74, GHR	1283	36	16881	2.55839	1	0.625308	58.1579
GOTERM_BP_DIRECT	GO:0030325~adrenal gland development	5	0.333333	0.0524522	CDKN1C, DKK3, ARID5B, PBX1, MDK	1286	19	16792	3.4362	1	0.698601	63.6798
GOTERM_BP_DIRECT	GO:0009083~branched-chain amino acid catabolic process	5	0.333333	0.0524522	BCAT1, ALDH6A1, DBT, ACADSB, ACAT1	1286	19	16792	3.4362	1	0.698601	63.6798
GOTERM_BP_DIRECT	GO:0045926~negative regulation of growth	5	0.333333	0.0524522	GPC3, MT1H, MT1X, MT1G, MT1F	1286	19	16792	3.4362	1	0.698601	63.6798
GOTERM_BP_DIRECT	GO:0001894~tissue homeostasis	5	0.333333	0.0524522	CTGF, AKR1B1, GNAS, RB1, SOX9	1286	19	16792	3.4362	1	0.698601	63.6798
KEGG_PATHWAY	hsa04015:Rap1 signaling pathway	27	1.8	0.0525645	FGFR2, ADCY1, ADCY7, TLN2, PDGFA, ITGB2, CDH1, KIT, ITGAM, RAC2, RAPGEF6, RAPGEF5, RAPGEF4, PDGFD, PIK3R3, PIK3CG, FYB, GNAO1, MAP2K1, MET, FGF21, PRKCB, VEGFC, MAPK13, PDGFRA, GNAS, LCP2	617	210	6910	1.43992	1	0.216756	50.9522
GOTERM_BP_DIRECT	GO:0043065~positive regulation of apoptotic process	32	2.13333	0.0532639	CYP1B1, ZMAT3, APH1B, SOX4, AKAP13, TGFB1, PDCD2, SOS1, PYCARD, DHODH, FAS, INPP5D, FGD4, TXNIP, ARHGEF3, GZMA, ARHGEF18, KLF11, GPER1, FRZB, SIRT1, STK4, SLIT2, IFIT2, ITGA6, NUPR1, MLLT11, ID3, PDCD5, DUSP6, KALRN, PNMA1	1286	300	16792	1.3928	1	0.702499	64.2602
KEGG_PATHWAY	hsa00280:Valine, leucine and isoleucine degradation	9	0.6	0.0537647	BCAT1, ALDH6A1, DBT, ACADSB, MCEE, OXCT1, AOX1, ABAT, ACAT1	617	47	6910	2.14456	1	0.218089	51.7656
GOTERM_BP_DIRECT	GO:0007584~response to nutrient	11	0.733333	0.0547267	PKM, SLC8A1, SSTR1, CD3E, OXCT1, TTPA, OGT, ACSL4, STAT1, NQO1, UGT1A1	1286	74	16792	1.94099	1	0.710736	65.2841
GOTERM_CC_DIRECT	GO:0032433~filopodium tip	4	0.266667	0.056277	MYO5A, MYO10, OSBPL3, VIL1	1375	12	18224	4.41794	1	0.404614	57.1827
GOTERM_MF_DIRECT	GO:0005198~structural molecule activity	27	1.8	0.0564127	CLDN7, TLN2, VIM, CDC42SE1, CLDN10, JAG1, CLDN11, KRT23, KRT7, KRT8, SNTB1, ASPH, LAMB1, TUBA1A, COL4A3, MAP1B, ANXA1, COL15A1, LAMA2, EPB41L3, KRT19, KRT18, LAMC3, CDC42SE2, SPAG4, MAP2, CSTA	1283	247	16881	1.43826	1	0.651482	61.2762
GOTERM_BP_DIRECT	GO:0045471~response to ethanol	14	0.933333	0.0572823	GGH, ADH6, SPARC, TYMS, EIF4EBP1, CCND1, OXCT1, GATA3, CASP8, SETD7, ABAT, NQO1, CD27, GSTP1	1286	105	16792	1.74101	1	0.725739	67.0066
KEGG_PATHWAY	hsa05223:Non-small cell lung cancer	10	0.666667	0.0577733	PIK3CG, E2F3, CCND1, MAP2K1, RXRA, SOS1, RB1, PIK3R3, STK4, PRKCB	617	56	6910	1.99988	1	0.229494	54.3929
GOTERM_MF_DIRECT	GO:0008146~sulfotransferase activity	7	0.466667	0.058167	SULT1C4, SULT1B1, CHST9, HS3ST1, CHST11, CHST4, SULT1E1	1283	37	16881	2.48925	1	0.658	62.4359
GOTERM_BP_DIRECT	GO:0030336~negative regulation of cell migration	13	0.866667	0.0582817	RECK, RAP2B, CYP1B1, BST2, IFITM1, STK24, DPYSL3, TPM1, FAM60A, SLIT2, THY1, ROBO1, BCL2	1286	95	16792	1.78682	1	0.73031	67.658
GOTERM_BP_DIRECT	GO:0007264~small GTPase mediated signal transduction	27	1.8	0.0583455	NARR, RALGPS1, ARHGAP18, RRAD, ARHGAP35, DOCK2, DAB1, RAC2, SOS1, RAPGEF6, RAPGEF5, RAPGEF4, RAB25, DOCK10, DOCK11, RHOH, RAB8B, RASEF, ARHGEF18, DOCK9, GEM, DOCK8, RERG, ARHGAP30, RAB31, RHEB, ARL4C	1286	246	16792	1.43314	1	0.72898	67.6992
GOTERM_BP_DIRECT	GO:0043950~positive regulation of cAMP-mediated signaling	4	0.266667	0.0583839	CXCL9, GNAS, CXCL11, CXCL10	1286	12	16792	4.35251	1	0.727497	67.7239
GOTERM_BP_DIRECT	GO:0032727~positive regulation of interferon-alpha production	4	0.266667	0.0583839	DDX58, IFIH1, ZC3HAV1, IRF7	1286	12	16792	4.35251	1	0.727497	67.7239
GOTERM_BP_DIRECT	GO:0050921~positive regulation of chemotaxis	4	0.266667	0.0583839	CCL21, F2RL1, CCL19, TGFB1	1286	12	16792	4.35251	1	0.727497	67.7239
GOTERM_BP_DIRECT	GO:0050777~negative regulation of immune response	4	0.266667	0.0583839	COL3A1, INPP5D, HLA-G, TGFB2	1286	12	16792	4.35251	1	0.727497	67.7239
GOTERM_BP_DIRECT	GO:0022409~positive regulation of cell-cell adhesion	4	0.266667	0.0583839	CD47, MYO10, ITGA6, LEF1	1286	12	16792	4.35251	1	0.727497	67.7239
GOTERM_BP_DIRECT	GO:0042552~myelination	8	0.533333	0.0588927	MYO5A, TNFRSF21, MALL, NFASC, CMTM8, PMP22, JAM3, TGFB1	1286	46	16792	2.27088	1	0.728949	68.0501
GOTERM_BP_DIRECT	GO:0045786~negative regulation of cell cycle	7	0.466667	0.0599505	NUPR1, ETS1, GMNN, GATA3, HPGD, TGFB1, RUNX3	1286	37	16792	2.47035	1	0.73373	68.7185
KEGG_PATHWAY	hsa00051:Fructose and mannose metabolism	7	0.466667	0.0602346	ALDOA, SORD, HKDC1, AKR1B10, AKR1B1, PFKP, PFKM	617	32	6910	2.44986	1	0.235027	55.9399
KEGG_PATHWAY	hsa05212:Pancreatic cancer	11	0.733333	0.0604356	PIK3CG, E2F3, CCND1, RAC2, MAP2K1, TGFBR1, RB1, STAT1, PIK3R3, TGFB1, TGFB2	617	65	6910	1.89527	1	0.232564	56.064
KEGG_PATHWAY	hsa00380:Tryptophan metabolism	8	0.533333	0.0607705	AADAT, DDC, CYP1B1, MAOA, AOX1, AOC1, ACAT1, INMT	617	40	6910	2.23987	1	0.230628	56.2702
GOTERM_BP_DIRECT	GO:0001934~positive regulation of protein phosphorylation	16	1.06667	0.0611081	TNIK, GPER1, SOX9, STK4, SIRT1, GAS6, TGFB1, ANXA2, DAB2, CCND1, CCND3, CCND2, RASGRP1, SEMA4D, GPNMB, FAM129A	1286	127	16792	1.64504	1	0.738981	69.4347
GOTERM_MF_DIRECT	GO:0008270~zinc ion binding	104	6.93333	0.061146	S100A6, GDA, THRB, CNDP1, MMP7, APOBEC3G, MYLIP, MMP2, RNF213, APOBEC3F, BBOX1, APOBEC3C, LNX1, APOBEC3B, GATA6, GATA3, CPA3, LONRF2, RNF145, CA12, RXRA, CECR1, TRIM38, CPE, TRIM31, TGFB1I1, RNF135, ADAMTS2, IFIH1, ENPP1, ADAMTSL2, ENPP2, ADAMTSL3, MME, OAS1, OAS2, SP110, TTC3, PEG10, RNF165, TRIM69, TRAF5, AGBL3, CRIP1, PTGR1, CRIP2, LMCD1, ESRRG, LACTB2, BRCA1, DDX58, TRIM55, CBLB, ZNF385B, CRY…	1283	1169	16881	1.17055	1	0.671888	64.3307
GOTERM_BP_DIRECT	GO:0048545~response to steroid hormone	5	0.333333	0.0617388	MDM2, SRD5A2, LOX, SPP1, PAQR5	1286	20	16792	3.26439	1	0.741021	69.8184
GOTERM_BP_DIRECT	GO:0030101~natural killer cell activation	5	0.333333	0.0617388	IL18, CASP8, CD2, ITGB2, SLAMF7	1286	20	16792	3.26439	1	0.741021	69.8184
GOTERM_BP_DIRECT	GO:0032753~positive regulation of interleukin-4 production	5	0.333333	0.0617388	PRKCQ, CD3E, GATA3, HLA-E, LGALS9	1286	20	16792	3.26439	1	0.741021	69.8184
GOTERM_BP_DIRECT	GO:0050850~positive regulation of calcium-mediated signaling	5	0.333333	0.0617388	P2RX5, CD8A, CD3E, TRAT1, SYK	1286	20	16792	3.26439	1	0.741021	69.8184
GOTERM_BP_DIRECT	GO:0071385~cellular response to glucocorticoid stimulus	5	0.333333	0.0617388	ZFP36L2, HEY1, ANXA1, UGT1A1, GSTP1	1286	20	16792	3.26439	1	0.741021	69.8184
GOTERM_CC_DIRECT	GO:0030315~T-tubule	7	0.466667	0.0630342	SLC8A1, EZR, ANK2, ANK3, KCNN2, RDX, KCNJ3	1375	38	18224	2.44149	1	0.436602	61.4594
KEGG_PATHWAY	hsa05231:Choline metabolism in cancer	15	1	0.0633059	PIK3CG, SLC44A3, MAP2K1, PDGFA, CHPT1, PRKCB, DGKA, EIF4EBP1, RAC2, SOS1, PDGFRA, RHEB, PDGFD, PIK3R3, PLA2G4C	617	101	6910	1.66327	1	0.236164	57.8022
GOTERM_MF_DIRECT	GO:0004867~serine-type endopeptidase inhibitor activity	13	0.866667	0.0633061	RECK, SERPINB9, A2M, PZP, SERPINE2, ITIH1, SPINT2, COL6A3, TFPI, ITIH5, SPINT1, PAPLN, CRIM1	1283	97	16881	1.76337	1	0.680079	65.6482
GOTERM_MF_DIRECT	GO:0019901~protein kinase binding	38	2.53333	0.063418	CD8A, ITGB2, GPRC5B, TTN, IQGAP1, TRIM5, TMEM173, ANK2, GATA6, MAPKAP1, MAP3K1, ADRA2A, H2AFY, STK39, MLKL, CD24, CNTLN, GHR, SYK, PTPRC, SLC12A2, MAP2K1, CD3E, HCLS1, DPYSL2, RACGAP1, TRIM22, PPP1CB, THY1, CCND1, PPP1R9A, CCND3, CCND2, CEP68, LCK, ZBTB4, RHEB, AKAP7	1283	376	16881	1.32974	1	0.675912	65.7152
GOTERM_BP_DIRECT	GO:0006869~lipid transport	11	0.733333	0.0635189	APOL2, APOL3, CFHR4, OSBPL3, LPA, GULP1, APOF, OSBPL6, TMEM30B, ABCA6, ABCA5	1286	76	16792	1.88991	1	0.749595	70.8768
GOTERM_BP_DIRECT	GO:0030509~BMP signaling pathway	11	0.733333	0.0635189	UBE2D3, CHRDL1, SMAD9, USP9Y, TGFBR3, LEF1, SMURF2, FSTL1, TMEM100, RUNX2, BMP5	1286	76	16792	1.88991	1	0.749595	70.8768
GOTERM_BP_DIRECT	GO:0051781~positive regulation of cell division	8	0.533333	0.0648386	FGFR2, VEGFC, PDGFA, PDGFD, HTR2B, MDK, TGFB1, TGFB2	1286	47	16792	2.22256	1	0.755309	71.6387
GOTERM_BP_DIRECT	GO:0032956~regulation of actin cytoskeleton organization	8	0.533333	0.0648386	CORO1A, EZR, BST2, PDGFA, ARHGAP18, ARHGAP35, TGFB2, EPHA3	1286	47	16792	2.22256	1	0.755309	71.6387
KEGG_PATHWAY	hsa05203:Viral carcinogenesis	26	1.73333	0.0653001	PKM, GSN, CASP8, PIK3R3, TRAF5, SYK, PIK3CG, SP100, HLA-A, SKP2, HLA-C, RB1, HLA-B, HLA-E, HLA-G, HLA-F, IRF9, CDKN1A, CCND1, CCND3, CCR5, CCND2, IRF7, MDM2, JAK3, EIF2AK2	617	205	6910	1.42041	1	0.239737	58.9722
GOTERM_BP_DIRECT	GO:0097421~liver regeneration	6	0.4	0.0665659	TYMS, CCND1, PTPN3, SULF2, UCP2, TGFB1	1286	29	16792	2.70156	1	0.763023	72.6074
GOTERM_BP_DIRECT	GO:0030203~glycosaminoglycan metabolic process	6	0.4	0.0665659	GPC4, BGN, GPC3, CHST9, VCAN, DCN	1286	29	16792	2.70156	1	0.763023	72.6074
GOTERM_BP_DIRECT	GO:0033209~tumor necrosis factor-mediated signaling pathway	15	1	0.066676	TNFRSF10A, TNFRSF21, KRT18, TNFSF13B, KRT8, PYCARD, TNFRSF17, TNFRSF19, PLVAP, FAS, STAT1, LTB, CD27, PSMB8, PSMB9	1286	118	16792	1.65986	1	0.762008	72.6681
GOTERM_BP_DIRECT	GO:0019933~cAMP-mediated signaling	7	0.466667	0.0667899	ADCY1, EIF4EBP2, ADCY7, RAPGEF4, PDE4D, SOX9, DEFB1	1286	38	16792	2.40534	1	0.761018	72.7307
GOTERM_BP_DIRECT	GO:0001942~hair follicle development	7	0.466667	0.0667899	PDGFA, SOS1, TNFRSF19, APCDD1, SOX9, LGR4, TGFB2	1286	38	16792	2.40534	1	0.761018	72.7307
GOTERM_BP_DIRECT	GO:0010811~positive regulation of cell-substrate adhesion	7	0.466667	0.0667899	SMOC2, ITGA6, FOXF1, NPNT, CCDC80, COL8A1, ABI3BP	1286	38	16792	2.40534	1	0.761018	72.7307
GOTERM_BP_DIRECT	GO:0032720~negative regulation of tumor necrosis factor production	7	0.466667	0.0667899	IRAK3, NLRC3, PTPN22, GPNMB, GAS6, GSTP1, LGALS9	1286	38	16792	2.40534	1	0.761018	72.7307
GOTERM_BP_DIRECT	GO:0001657~ureteric bud development	7	0.466667	0.0667899	FGFR2, EPCAM, SMAD9, NPNT, TGFB1, SIM1, SLIT2	1286	38	16792	2.40534	1	0.761018	72.7307
GOTERM_MF_DIRECT	GO:0017124~SH3 domain binding	15	1	0.0670994	ENAH, FUT8, CD3E, HCLS1, PTPN22, DPYSL3, ELMO2, CYBA, SH3BGRL, CBLB, SOS1, WIPF3, MICAL1, WIPF1, INPP5D	1283	119	16881	1.6585	1	0.692401	67.8519
GOTERM_BP_DIRECT	GO:0007507~heart development	21	1.4	0.0675399	CRIP1, MAP2K1, TGFBR1, COL3A1, FBN1, SOX4, AKAP13, BICC1, SPARC, TGFB1, TGFB2, ROBO1, GATA3, OXCT1, FOXF1, HEG1, ID3, LOX, HTR2B, COX17, PCSK5	1286	183	16792	1.49841	1	0.763383	73.1398
KEGG_PATHWAY	hsa04350:TGF-beta signaling pathway	13	0.866667	0.0678711	SMAD9, TGFBR1, DCN, TGFB1, ACVR1C, TGFB2, INHBC, TGIF1, ID4, SMURF2, ID3, BMP5, TFDP1	617	84	6910	1.73323	1	0.245075	60.4363
KEGG_PATHWAY	hsa05219:Bladder cancer	8	0.533333	0.0679175	CDKN1A, E2F3, CCND1, MAP2K1, MDM2, CDH1, RB1, MMP2	617	41	6910	2.18524	1	0.242185	60.4623
KEGG_PATHWAY	hsa05143:African trypanosomiasis	7	0.466667	0.0683277	IL18, THOP1, F2RL1, FAS, SELE, HPR, PRKCB	617	33	6910	2.37562	1	0.240521	60.6913
GOTERM_CC_DIRECT	GO:0031234~extrinsic component of cytoplasmic side of plasma membrane	10	0.666667	0.0684294	ITK, S100A6, RGS1, FERMT2, LCK, JAK3, RACGAP1, IQGAP1, SYK, DTNA	1375	68	18224	1.94909	1	0.459386	64.5847
GOTERM_CC_DIRECT	GO:0042629~mast cell granule	5	0.333333	0.0687465	PIK3CG, RASGRP1, AKR1B1, ANXA1, KIT	1375	21	18224	3.15567	1	0.455909	64.7608
GOTERM_MF_DIRECT	GO:0097110~scaffold protein binding	8	0.533333	0.0688614	NCK2, KRT18, KRT8, VIM, CASP8, MDM2, DLL1, PDE4D	1283	48	16881	2.19291	1	0.697454	68.8297
GOTERM_CC_DIRECT	GO:0005794~Golgi apparatus	78	5.2	0.0691439	ZC3HAV1, F2RL1, IGFBP6, GLT8D2, TMEM173, CD44, EVI5, CTGF, ANK3, MAPKAP1, ST3GAL6, ATP8B2, JAKMIP2, GOLM1, TRPM4, PARM1, MAN1A2, STMN3, BST2, CRYAB, STMN2, HLA-A, ESR1, HLA-C, PKDCC, HLA-B, GPER1, MAN1A1, GRHL1, CPE, PTGDS, BACE2, HSPB8, ZDHHC13, NUCB2, VAMP5, SORT1, SGCE, COL1A1, BTN3A3, JAM3, PLA2G5, FGFR2, MYO5A, GALNT3, GLIS3, FUT8, NEDD9, RSAD2, RABGAP1L, PPT1, EHF, AKAP9, NEO1, LMAN1, ITM2A…	1375	863	18224	1.19791	1	0.452913	64.9804
KEGG_PATHWAY	hsa05202:Transcriptional misregulation in cancer	22	1.46667	0.069906	PLAT, TMPRSS2, ETV7, FUT8, PDGFA, RXRA, MET, SPINT1, ITGAM, PROM1, CD86, CCR7, CDKN1A, FLI1, NUPR1, CCND2, MDM2, PBX1, ETV6, NCOR1, RUNX2, HPGD	617	168	6910	1.46658	1	0.242552	61.5608
KEGG_PATHWAY	hsa00770:Pantothenate and CoA biosynthesis	5	0.333333	0.0699915	BCAT1, ENPP1, UPB1, ENPP3, VNN1	617	18	6910	3.11093	1	0.239928	61.6074
GOTERM_CC_DIRECT	GO:0055037~recycling endosome	14	0.933333	0.0703793	MYO5A, MICALL2, TNIK, ATP11A, CFTR, ACKR3, C1ORF210, GPER1, ATP11C, RAB11FIP3, INPP5F, TUBA1A, RAB11FIP1, SLC31A1	1375	110	18224	1.68685	1	0.454086	65.6549
GOTERM_MF_DIRECT	GO:0042608~T cell receptor binding	3	0.2	0.0703977	DOCK2, CD3E, HLA-A	1283	6	16881	6.57872	1	0.701119	69.6594
GOTERM_MF_DIRECT	GO:0008483~transaminase activity	4	0.266667	0.0704066	AADAT, ABAT, AGXT2, PSAT1	1283	13	16881	4.04844	1	0.69662	69.6642
GOTERM_MF_DIRECT	GO:0016805~dipeptidase activity	4	0.266667	0.0704066	FOLH1, FOLH1B, CNDP1, SCRN1	1283	13	16881	4.04844	1	0.69662	69.6642
GOTERM_BP_DIRECT	GO:0010862~positive regulation of pathway-restricted SMAD protein phosphorylation	8	0.533333	0.0711345	DAB2, RBPMS, TGFBR1, INHBC, GDF15, TGFB1, BMP5, TGFB2	1286	48	16792	2.17626	1	0.779953	75.0209
GOTERM_BP_DIRECT	GO:0002591~positive regulation of antigen processing and presentation of peptide antigen via MHC class I	3	0.2	0.0713654	TAP2, TAP1, ABCB1	1286	6	16792	6.52877	1	0.779542	75.1373
GOTERM_BP_DIRECT	GO:0003179~heart valve morphogenesis	3	0.2	0.0713654	SOX9, TGFB1, TGFB2	1286	6	16792	6.52877	1	0.779542	75.1373
GOTERM_BP_DIRECT	GO:0046632~alpha-beta T cell differentiation	3	0.2	0.0713654	BCL11B, ANXA1, LEF1	1286	6	16792	6.52877	1	0.779542	75.1373
GOTERM_BP_DIRECT	GO:0060706~cell differentiation involved in embryonic placenta development	3	0.2	0.0713654	KRT19, KRT8, STK4	1286	6	16792	6.52877	1	0.779542	75.1373
GOTERM_BP_DIRECT	GO:0051271~negative regulation of cellular component movement	3	0.2	0.0713654	SP100, PKHD1, TGFBR3	1286	6	16792	6.52877	1	0.779542	75.1373
GOTERM_BP_DIRECT	GO:0051045~negative regulation of membrane protein ectodomain proteolysis	3	0.2	0.0713654	PTPN3, TIMP2, TIMP1	1286	6	16792	6.52877	1	0.779542	75.1373
GOTERM_BP_DIRECT	GO:0002489~antigen processing and presentation of endogenous peptide antigen via MHC class Ib via ER pathway, TAP-dependent	3	0.2	0.0713654	TAP2, TAP1, ABCB1	1286	6	16792	6.52877	1	0.779542	75.1373
GOTERM_BP_DIRECT	GO:1903799~negative regulation of production of miRNAs involved in gene silencing by miRNA	3	0.2	0.0713654	ESR1, NCOR1, TGFB1	1286	6	16792	6.52877	1	0.779542	75.1373
GOTERM_BP_DIRECT	GO:0030816~positive regulation of cAMP metabolic process	3	0.2	0.0713654	CXCL9, CXCL11, CXCL10	1286	6	16792	6.52877	1	0.779542	75.1373
GOTERM_BP_DIRECT	GO:0042759~long-chain fatty acid biosynthetic process	3	0.2	0.0713654	MYO5A, SCD5, ELOVL6	1286	6	16792	6.52877	1	0.779542	75.1373
GOTERM_BP_DIRECT	GO:0001957~intramembranous ossification	3	0.2	0.0713654	CTSK, COL1A1, MMP2	1286	6	16792	6.52877	1	0.779542	75.1373
GOTERM_BP_DIRECT	GO:0071280~cellular response to copper ion	3	0.2	0.0713654	AQP1, AOC1, MT1G	1286	6	16792	6.52877	1	0.779542	75.1373
GOTERM_BP_DIRECT	GO:0002485~antigen processing and presentation of endogenous peptide antigen via MHC class I via ER pathway, TAP-dependent	3	0.2	0.0713654	TAP2, TAP1, ABCB1	1286	6	16792	6.52877	1	0.779542	75.1373
GOTERM_BP_DIRECT	GO:0032020~ISG15-protein conjugation	3	0.2	0.0713654	ISG15, HERC5, UBE2L6	1286	6	16792	6.52877	1	0.779542	75.1373
GOTERM_BP_DIRECT	GO:0038063~collagen-activated tyrosine kinase receptor signaling pathway	3	0.2	0.0713654	COL4A3, COL4A2, COL4A1	1286	6	16792	6.52877	1	0.779542	75.1373
GOTERM_CC_DIRECT	GO:0009925~basal plasma membrane	6	0.4	0.0713711	ITGA6, TACSTD2, ANK3, MET, AQP1, CEACAM1	1375	30	18224	2.65076	1	0.45406	66.1876
GOTERM_BP_DIRECT	GO:0043518~negative regulation of DNA damage response, signal transduction by p53 class mediator	4	0.266667	0.0717174	CD44, MDM2, SIRT1, CD74	1286	13	16792	4.01771	1	0.779718	75.3139
GOTERM_BP_DIRECT	GO:0060038~cardiac muscle cell proliferation	4	0.266667	0.0717174	C3ORF58, RXRA, TGFBR3, TGFB2	1286	13	16792	4.01771	1	0.779718	75.3139
GOTERM_BP_DIRECT	GO:0045651~positive regulation of macrophage differentiation	4	0.266667	0.0717174	LIF, HCLS1, CASP8, RB1	1286	13	16792	4.01771	1	0.779718	75.3139
GOTERM_BP_DIRECT	GO:0006809~nitric oxide biosynthetic process	4	0.266667	0.0717174	CYP1B1, SLC7A2, NQO1, GCHFR	1286	13	16792	4.01771	1	0.779718	75.3139
GOTERM_BP_DIRECT	GO:0055089~fatty acid homeostasis	4	0.266667	0.0717174	DGAT2, PRKAA2, SIRT1, GPAM	1286	13	16792	4.01771	1	0.779718	75.3139
GOTERM_BP_DIRECT	GO:0033630~positive regulation of cell adhesion mediated by integrin	4	0.266667	0.0717174	CCL21, NCKAP1L, TGFB2, SYK	1286	13	16792	4.01771	1	0.779718	75.3139
GOTERM_BP_DIRECT	GO:0050730~regulation of peptidyl-tyrosine phosphorylation	4	0.266667	0.0717174	PDGFA, ITGB2, PDGFD, IFNAR1	1286	13	16792	4.01771	1	0.779718	75.3139
GOTERM_BP_DIRECT	GO:0032740~positive regulation of interleukin-17 production	4	0.266667	0.0717174	PRKCQ, IL18, LY9, TGFB1	1286	13	16792	4.01771	1	0.779718	75.3139
GOTERM_BP_DIRECT	GO:0060391~positive regulation of SMAD protein import into nucleus	4	0.266667	0.0717174	DAB2, RBPMS, TGFBR1, TGFB1	1286	13	16792	4.01771	1	0.779718	75.3139
GOTERM_BP_DIRECT	GO:0060389~pathway-restricted SMAD protein phosphorylation	4	0.266667	0.0717174	TGFBR1, TGFBR3, TGFB1, TGFB2	1286	13	16792	4.01771	1	0.779718	75.3139
GOTERM_BP_DIRECT	GO:0060317~cardiac epithelial to mesenchymal transition	4	0.266667	0.0717174	HEY1, TGFBR1, TGFBR3, TGFB2	1286	13	16792	4.01771	1	0.779718	75.3139
GOTERM_BP_DIRECT	GO:0031954~positive regulation of protein autophosphorylation	5	0.333333	0.0718297	RAP2B, VEGFC, PDGFA, PDGFD, GPNMB	1286	21	16792	3.10894	1	0.778741	75.37
KEGG_PATHWAY	hsa04380:Osteoclast differentiation	18	1.2	0.0731049	PIK3CG, MAP2K1, TGFBR1, MITF, STAT1, TGFB1, STAT2, TGFB2, IFNAR1, IRF9, CYBA, CTSK, MAPK13, LCK, PIK3R3, SYK, TYROBP, LCP2	617	131	6910	1.53884	1	0.246587	63.2688
GOTERM_BP_DIRECT	GO:0006805~xenobiotic metabolic process	11	0.733333	0.0731717	ACSM2B, CYP1B1, CYP3A7, NCEH1, CYP2C19, SULT1B1, CYP2C18, NAT2, NQO1, AOC1, GSTP1	1286	78	16792	1.84145	1	0.783625	76.0308
GOTERM_BP_DIRECT	GO:0006469~negative regulation of protein kinase activity	13	0.866667	0.0749324	ASPN, FLRT2, PTPRC, TESC, DCN, RB1, CHAD, THY1, PPM1E, BGN, PPP1R1A, GSTP1, CEACAM1	1286	99	16792	1.71463	1	0.790279	76.8725
GOTERM_BP_DIRECT	GO:0006730~one-carbon metabolic process	6	0.4	0.0750731	SHMT2, MTHFD2L, ALDH1L1, MAT1A, CA12, GNMT	1286	30	16792	2.61151	1	0.789446	76.9385
GOTERM_BP_DIRECT	GO:0035556~intracellular signal transduction	40	2.66667	0.0758069	CXCL1, ADCY1, RALGPS1, ADCY7, STK17B, AKAP13, KIT, DGKA, CTGF, PPP1R1A, GUCY1A3, RAPGEF5, STK39, PRKAA2, INPP5D, PAG1, TYROBP, SYK, FYB, ARHGEF3, ITK, TNIK, TGFBR1, HCLS1, DCDC2, RACGAP1, STK4, DCDC1, PRKCB, CLEC4M, WSB1, PRKCQ, TNS1, MAPK13, TGFBR3, AKAP7, JAK3, PLA2G4C, LCP2, KALRN	1286	403	16792	1.29603	1	0.791294	77.28
GOTERM_MF_DIRECT	GO:0001227~transcriptional repressor activity, RNA polymerase II transcription regulatory region sequence-specific binding	9	0.6	0.0765203	AEBP1, ETV7, KLF12, ARID5B, MITF, ZBTB4, ARHGAP35, ZEB2, ETV6	1283	59	16881	2.00707	1	0.723215	72.7645
GOTERM_BP_DIRECT	GO:0007517~muscle organ development	12	0.8	0.0768224	LAMA2, AEBP1, EVC, TAGLN, CRYAB, COL6A3, VAMP5, SGCE, ID3, SIRT1, SGCB, CXCL10	1286	89	16792	1.76057	1	0.794358	77.7447
KEGG_PATHWAY	hsa04664:Fc epsilon RI signaling pathway	11	0.733333	0.0775047	PIK3CG, RAC2, MAP2K1, MAPK13, SOS1, INPP5D, PLA2G4C, PIK3R3, PRKCB, SYK, LCP2	617	68	6910	1.81166	1	0.256864	65.5037
GOTERM_MF_DIRECT	GO:0098641~cadherin binding involved in cell-cell adhesion	30	2	0.0781226	ALDOA, ZC3HAV1, CALD1, ARHGAP18, RDX, RANGAP1, CDH1, IQGAP1, EPCAM, PKM, EZR, NDRG1, EHD4, COBLL1, F11R, FMNL2, BSG, STK24, SWAP70, ANXA1, DOCK9, PFKP, S100A11, MPP7, STAT1, FLNA, ANXA2, KRT18, ITGA6, CAPG	1283	290	16881	1.36111	1	0.72652	73.5264
GOTERM_CC_DIRECT	GO:0005938~cell cortex	15	1	0.0795433	FGFR2, CYTIP, CRIP2, FERMT2, RAI14, FBLIM1, AKAP13, NEDD9, ANXA2, FNBP1, MYO10, CTGF, MARCKS, PLA2G4C, CD302	1375	123	18224	1.61632	1	0.487174	70.2929
KEGG_PATHWAY	hsa04919:Thyroid hormone signaling pathway	16	1.06667	0.080569	PIK3CG, FXYD2, MAP2K1, THRB, SLC16A10, RXRA, ESR1, STAT1, PRKCB, CCND1, NCOA2, ITGAV, RHEB, MDM2, PIK3R3, NCOR1	617	114	6910	1.57184	1	0.262916	66.9852
GOTERM_BP_DIRECT	GO:0043010~camera-type eye development	7	0.466667	0.0817715	CDKN1C, RXRA, EFEMP1, FBN1, ARHGAP35, MAB21L2, FOXP2	1286	40	16792	2.28507	1	0.813721	79.8837
GOTERM_BP_DIRECT	GO:0050718~positive regulation of interleukin-1 beta secretion	5	0.333333	0.0827033	PYCARD, CCL19, CASP1, LGALS9, IFNAR1	1286	22	16792	2.96762	1	0.816037	80.2639
GOTERM_BP_DIRECT	GO:0046329~negative regulation of JNK cascade	5	0.333333	0.0827033	DACT1, MARVELD3, F2RL1, ITCH, NCOR1	1286	22	16792	2.96762	1	0.816037	80.2639
GOTERM_BP_DIRECT	GO:0045332~phospholipid translocation	5	0.333333	0.0827033	ATP11A, ATP8B2, ABCB1, ATP10D, ATP11C	1286	22	16792	2.96762	1	0.816037	80.2639
GOTERM_BP_DIRECT	GO:0010842~retina layer formation	5	0.333333	0.0827033	PROM1, TSPAN12, PTPRM, HIPK2, RDH13	1286	22	16792	2.96762	1	0.816037	80.2639
GOTERM_CC_DIRECT	GO:0031091~platelet alpha granule	4	0.266667	0.0832931	VWF, SERPINE2, SPARC, THBS2	1375	14	18224	3.78681	1	0.498845	72.0168
GOTERM_BP_DIRECT	GO:0046718~viral entry into host cell	11	0.733333	0.0836966	F11R, LAMP1, CD86, LAMP3, ITGAV, CLEC4G, ACE2, ITGA2, ITCH, GAS6, CLEC4M	1286	80	16792	1.79541	1	0.818546	80.6618
GOTERM_BP_DIRECT	GO:0043552~positive regulation of phosphatidylinositol 3-kinase activity	6	0.4	0.0841395	CCR7, CCL21, PDGFRA, CCL19, KIT, TGFB1	1286	31	16792	2.52727	1	0.818899	80.8368
GOTERM_MF_DIRECT	GO:0004012~phospholipid-translocating ATPase activity	4	0.266667	0.0847299	ATP11A, ATP8B2, ATP10D, ATP11C	1283	14	16881	3.75927	1	0.751963	76.4618
GOTERM_MF_DIRECT	GO:0031005~filamin binding	4	0.266667	0.0847299	MICALL2, FBLIM1, DPYSL3, CEACAM1	1283	14	16881	3.75927	1	0.751963	76.4618
GOTERM_BP_DIRECT	GO:0030855~epithelial cell differentiation	10	0.666667	0.0850711	FGFR2, F11R, COL4A1, LGALS3, TAGLN, SULT1B1, VIL1, EHF, ID3, ANXA4	1286	70	16792	1.86536	1	0.821107	81.1999
GOTERM_CC_DIRECT	GO:0030669~clathrin-coated endocytic vesicle membrane	7	0.466667	0.0850764	HLA-DQB1, HLA-DRB1, HLA-DPA1, HLA-DPB1, CD74, HLA-DQA1, HLA-DRA	1375	41	18224	2.26285	1	0.501673	72.8034
GOTERM_CC_DIRECT	GO:0043005~neuron projection	25	1.66667	0.0856265	S100A4, MYO5A, MICALL2, FLRT2, STMN3, STMN2, SLC6A13, VIM, PTPN13, IQGAP1, MYO10, DAB1, HNMT, ANK2, ANK3, SSTR1, BCL11B, TENM2, CASP8, MAP2, ABAT, CYGB, FAS, SNAP25, CD27	1375	237	18224	1.39808	1	0.499228	73.0419
GOTERM_BP_DIRECT	GO:0030833~regulation of actin filament polymerization	4	0.266667	0.0862711	PPP1R9A, CORO1A, HCLS1, ARHGAP18	1286	14	16792	3.73073	1	0.824271	81.6581
GOTERM_BP_DIRECT	GO:0001516~prostaglandin biosynthetic process	4	0.266667	0.0862711	PTGIS, PTGDS, FAM213B, CD74	1286	14	16792	3.73073	1	0.824271	81.6581
GOTERM_BP_DIRECT	GO:0060065~uterus development	4	0.266667	0.0862711	CDKN1C, GATA3, ESR1, TGFB2	1286	14	16792	3.73073	1	0.824271	81.6581
GOTERM_BP_DIRECT	GO:0043101~purine-containing compound salvage	4	0.266667	0.0862711	DCK, GMPR, AMPD3, AMPD1	1286	14	16792	3.73073	1	0.824271	81.6581
GOTERM_BP_DIRECT	GO:0051016~barbed-end actin filament capping	4	0.266667	0.0862711	GSN, VIL1, CAPG, RDX	1286	14	16792	3.73073	1	0.824271	81.6581
GOTERM_BP_DIRECT	GO:0003382~epithelial cell morphogenesis	4	0.266667	0.0862711	AR, BCL11B, RAB25, PALLD	1286	14	16792	3.73073	1	0.824271	81.6581
GOTERM_MF_DIRECT	GO:0044325~ion channel binding	14	0.933333	0.086792	TRPC1, SLC8A1, AKAP9, PDE4D, HOMER1, FKBP1B, FLNA, GPD1L, PPP1R9A, ABCC9, ANK2, ANK3, NEDD4L, ASPH	1283	113	16881	1.63013	1	0.756509	77.3134
KEGG_PATHWAY	hsa04320:Dorso-ventral axis formation	6	0.4	0.0867934	ETV7, MAP2K1, ETS1, SOS1, PIWIL4, ETV6	617	27	6910	2.48874	1	0.277791	69.8153
KEGG_PATHWAY	hsa00650:Butanoate metabolism	6	0.4	0.0867934	ACSM2B, ACSM3, OXCT1, ACSM2A, ABAT, ACAT1	617	27	6910	2.48874	1	0.277791	69.8153
KEGG_PATHWAY	hsa04620:Toll-like receptor signaling pathway	15	1	0.0871015	PIK3CG, MAP2K1, CXCL9, STAT1, CCL5, CXCL11, IFNAR1, CXCL10, CTSK, CD86, MAPK13, IRF7, CASP8, PIK3R3, SPP1	617	106	6910	1.58481	1	0.275637	69.9493
GOTERM_BP_DIRECT	GO:0007204~positive regulation of cytosolic calcium ion concentration	16	1.06667	0.0879774	TRPM4, PIK3CG, PTGER4, SWAP70, F2RL1, ESR1, CD52, FPR3, GPER1, CCR7, CCR5, CXCR4, CCR2, AVPR1A, PDGFRA, CD24	1286	134	16792	1.55911	1	0.829187	82.2914
GOTERM_BP_DIRECT	GO:0043410~positive regulation of MAPK cascade	11	0.733333	0.0892876	LIF, FGFR2, TRIM5, AR, PDGFA, WWC1, FAS, KIT, GPER1, TIMP2, CD27	1286	81	16792	1.77325	1	0.83255	82.7635
GOTERM_BP_DIRECT	GO:0044255~cellular lipid metabolic process	7	0.466667	0.0899072	NCOA2, RXRA, HAO2, ABHD1, PNPLA4, TBL1X, NCOR1	1286	41	16792	2.22934	1	0.833437	82.9826
GOTERM_BP_DIRECT	GO:0070527~platelet aggregation	7	0.466667	0.0899072	PIK3CG, RAP2B, PDGFRA, GNAS, FLNA, GAS6, MYL9	1286	41	16792	2.22934	1	0.833437	82.9826
GOTERM_CC_DIRECT	GO:0031430~M band	5	0.333333	0.0904348	ALDOA, ANK2, CRYAB, CMYA5, TTN	1375	23	18224	2.88126	1	0.514435	75.045
GOTERM_BP_DIRECT	GO:0009653~anatomical structure morphogenesis	12	0.8	0.0922827	SFRP5, GPC4, IER3, DKK3, KRT18, MPZL2, GPC3, FAT1, GATA3, IGF2BP2, MCAM, RCAN3	1286	92	16792	1.70316	1	0.84027	83.7985
GOTERM_MF_DIRECT	GO:0045296~cadherin binding	5	0.333333	0.0923114	PROM1, PTPRM, ANK3, NDRG1, CTNNA3	1283	23	16881	2.86031	1	0.774463	79.4528
GOTERM_MF_DIRECT	GO:0048020~CCR chemokine receptor binding	5	0.333333	0.0923114	CCL20, CCL21, CCL19, CCL15, CCL18	1283	23	16881	2.86031	1	0.774463	79.4528
GOTERM_CC_DIRECT	GO:0005579~membrane attack complex	3	0.2	0.0925347	C8A, C8B, C7	1375	7	18224	5.68021	1	0.518184	75.8756
GOTERM_CC_DIRECT	GO:0009898~cytoplasmic side of plasma membrane	7	0.466667	0.093256	PTPN3, CD2, PTPN22, CDH1, GEM, KIT, TRAF5	1375	42	18224	2.20897	1	0.516394	76.1549
GOTERM_MF_DIRECT	GO:0004321~fatty-acyl-CoA synthase activity	3	0.2	0.093708	ACSM2B, ACSM3, ACSM2A	1283	7	16881	5.6389	1	0.775831	79.9633
GOTERM_MF_DIRECT	GO:0016494~C-X-C chemokine receptor activity	3	0.2	0.093708	CXCR4, CXCR6, ACKR3	1283	7	16881	5.6389	1	0.775831	79.9633
GOTERM_MF_DIRECT	GO:0015645~fatty acid ligase activity	3	0.2	0.093708	ACSM2B, ACSM3, ACSM2A	1283	7	16881	5.6389	1	0.775831	79.9633
GOTERM_MF_DIRECT	GO:0015125~bile acid transmembrane transporter activity	3	0.2	0.093708	SLCO1A2, AKR1C4, CEACAM1	1283	7	16881	5.6389	1	0.775831	79.9633
GOTERM_BP_DIRECT	GO:1903077~negative regulation of protein localization to plasma membrane	3	0.2	0.0949596	DAB2, TGFB1, GBP1	1286	7	16792	5.59609	1	0.847747	84.6734
GOTERM_BP_DIRECT	GO:0030913~paranodal junction assembly	3	0.2	0.0949596	EPB41L3, ANK2, NFASC	1286	7	16792	5.59609	1	0.847747	84.6734
GOTERM_BP_DIRECT	GO:2000270~negative regulation of fibroblast apoptotic process	3	0.2	0.0949596	PIK3CG, CFDP1, GAS6	1286	7	16792	5.59609	1	0.847747	84.6734
GOTERM_BP_DIRECT	GO:0019048~modulation by virus of host morphology or physiology	3	0.2	0.0949596	RXRA, HIPK2, CLEC4M	1286	7	16792	5.59609	1	0.847747	84.6734
GOTERM_BP_DIRECT	GO:0002481~antigen processing and presentation of exogenous protein antigen via MHC class Ib, TAP-dependent	3	0.2	0.0949596	TAP2, TAP1, ABCB1	1286	7	16792	5.59609	1	0.847747	84.6734
GOTERM_BP_DIRECT	GO:2001259~positive regulation of cation channel activity	3	0.2	0.0949596	ANK2, ANK3, CTSS	1286	7	16792	5.59609	1	0.847747	84.6734
GOTERM_BP_DIRECT	GO:0043305~negative regulation of mast cell degranulation	3	0.2	0.0949596	CD84, FOXF1, LGALS9	1286	7	16792	5.59609	1	0.847747	84.6734
GOTERM_BP_DIRECT	GO:0019885~antigen processing and presentation of endogenous peptide antigen via MHC class I	3	0.2	0.0949596	TAP2, TAP1, HLA-A	1286	7	16792	5.59609	1	0.847747	84.6734
GOTERM_BP_DIRECT	GO:0046826~negative regulation of protein export from nucleus	3	0.2	0.0949596	SP100, SOX4, RANGAP1	1286	7	16792	5.59609	1	0.847747	84.6734
GOTERM_BP_DIRECT	GO:0060687~regulation of branching involved in prostate gland morphogenesis	3	0.2	0.0949596	FGFR2, RXRA, ESR1	1286	7	16792	5.59609	1	0.847747	84.6734
GOTERM_BP_DIRECT	GO:2000510~positive regulation of dendritic cell chemotaxis	3	0.2	0.0949596	CCR7, GAS6, LGALS9	1286	7	16792	5.59609	1	0.847747	84.6734
GOTERM_BP_DIRECT	GO:0051593~response to folic acid	3	0.2	0.0949596	ASCL1, TYMS, BCHE	1286	7	16792	5.59609	1	0.847747	84.6734
GOTERM_BP_DIRECT	GO:0060463~lung lobe morphogenesis	3	0.2	0.0949596	LIF, FGFR2, FOXF1	1286	7	16792	5.59609	1	0.847747	84.6734
GOTERM_BP_DIRECT	GO:0044321~response to leptin	3	0.2	0.0949596	CCND1, LEPR, SIRT1	1286	7	16792	5.59609	1	0.847747	84.6734
GOTERM_MF_DIRECT	GO:0004871~signal transducer activity	22	1.46667	0.0952764	PLCXD3, GNAO1, BST2, GULP1, AKAP13, SP110, STAT1, LGALS9, FLNA, STAT2, TRIM55, APOL3, TRIM38, CBLB, PLEKHB1, IL10RA, ZDHHC13, SHISA5, IL1RAP, GNAS, FAS, CD24	1283	204	16881	1.41894	1	0.777802	80.5223
GOTERM_BP_DIRECT	GO:0098609~cell-cell adhesion	28	1.86667	0.0954894	ALDOA, ZC3HAV1, CALD1, ARHGAP18, RANGAP1, RDX, IQGAP1, EPCAM, PKM, NDRG1, CEACAM1, EHD4, COBLL1, F11R, FMNL2, BSG, STK24, SWAP70, DOCK9, PFKP, S100A11, MPP7, STAT1, ELMO2, ANXA2, KRT18, TACSTD2, CAPG	1286	271	16792	1.34912	1	0.848212	84.8412
GOTERM_MF_DIRECT	GO:0005160~transforming growth factor beta receptor binding	7	0.466667	0.0957558	INHBC, TGFBR3, SMURF2, GDF15, TGFB1, BMP5, TGFB2	1283	42	16881	2.19291	1	0.775744	80.6903
KEGG_PATHWAY	hsa00040:Pentose and glucuronate interconversions	7	0.466667	0.0961801	SORD, AKR1B10, AKR1B1, UGT2A1, UGT2A3, UGT1A1, XYLB	617	36	6910	2.17765	1	0.297632	73.6617
GOTERM_MF_DIRECT	GO:0005088~Ras guanyl-nucleotide exchange factor activity	14	0.933333	0.0963997	FGFR2, NRTN, PDGFA, AKAP9, KIT, RASGRP1, SOS1, PDGFRA, GFRA1, RAPGEF5, RAPGEF4, IL2RG, JAK3, CSF2RA	1283	115	16881	1.60178	1	0.774319	80.9137
KEGG_PATHWAY	hsa05210:Colorectal cancer	10	0.666667	0.0969837	PIK3CG, CCND1, RAC2, MAP2K1, TGFBR1, BCL2, LEF1, PIK3R3, TGFB1, TGFB2	617	62	6910	1.80635	1	0.296685	73.9689
KEGG_PATHWAY	hsa00640:Propanoate metabolism	6	0.4	0.0983108	ALDH6A1, LDHB, MCEE, ABAT, ACACB, ACAT1	617	28	6910	2.39986	1	0.297154	74.4691
GOTERM_CC_DIRECT	GO:0000307~cyclin-dependent protein kinase holoenzyme complex	4	0.266667	0.0985125	CDKN1A, CCND1, CCND3, CCND2	1375	15	18224	3.53435	1	0.532163	78.1011
GOTERM_BP_DIRECT	GO:0071320~cellular response to cAMP	8	0.533333	0.0998048	PIK3CG, SLC8A1, EZR, AKAP7, AKAP9, CFTR, PDE4D, AQP1	1286	52	16792	2.00885	1	0.860097	86.1445

## Sheet: GSE49541
Category	Term	Count	%	PValue	Genes	List Total	Pop Hits	Pop Total	Fold Enrichment	Bonferroni	Benjamini	FDR
GOTERM_BP_DIRECT	GO:0030198~extracellular matrix organization	29	12.2363	3.9672e-21	PDGFA, LUM, NPNT, TNC, COL3A1, DCN, SOX9, ABI3BP, SMOC2, ITGB8, COL6A3, THBS1, LAMB1, LOXL1, SPP1, COL4A4, COL4A3, COL4A2, COL4A1, FBN1, CCDC80, COL5A2, COL5A1, VWF, COL14A1, FBLN5, COL1A2, VCAN, COL1A1	223	196	16792	11.1414	5.6493e-18	5.6493e-18	6.55019e-18
GOTERM_CC_DIRECT	GO:0031012~extracellular matrix	32	13.5021	8.6692e-20	LUM, TNC, IGFBP7, COL3A1, DCN, EDIL3, ABI3BP, OGN, HMCN1, SERPINE2, COL6A3, THBS1, LAMB1, LOXL1, THBS2, DPT, SPON1, COL4A2, COL4A1, LGALS3, EFEMP1, FBN1, COL15A1, MGP, COL5A2, COL5A1, VWF, COL14A1, FBLN5, COL1A2, VCAN, COL1A1	231	296	18224	8.52884	2.13262e-17	2.13262e-17	1.12335e-16
GOTERM_CC_DIRECT	GO:0005615~extracellular space	62	26.1603	3.75721e-19	CTHRC1, PDGFA, IGFBP7, FAM3B, FSTL1, OGN, MTHFD2, WISP1, GPC3, SERPINE2, CTGF, GSN, PAPPA, MS4A1, SEMA3C, LOXL4, PDGFD, LOXL1, GOLM1, SPON1, CTSK, PTGDS, CPE, TACSTD2, COL1A2, VCAN, COL1A1, ENPP2, TNC, LUM, COL3A1, CD109, CXCL8, IL32, DCN, CXCL6, GPRC5B, ABI3BP, CCL20, COL6A3, LAMB1, THBS1, DPT, SPP1, FLRT2, LGALS3, FETUB, PODXL, FBN1, EFEMP1, CHI3L1, COL15A1, CCL19, DPYSL3, HGF, MCAM, FRZB, PROM…	231	1347	18224	3.63125	9.24275e-17	4.62137e-17	4.86859e-16
GOTERM_BP_DIRECT	GO:0007155~cell adhesion	37	15.6118	4.39486e-18	PLXNC1, IGFBP7, TNC, IL32, CLDN10, EDIL3, ITGBL1, WISP1, SRPX, ITGB8, CTGF, ROBO1, FAT1, COL6A3, CD24, LAMB1, THBS1, THBS2, SPP1, DPT, SPON1, COL4A3, PODXL, COL15A1, CHST4, CDHR5, MCAM, PCDH17, SSPN, COL5A1, THY1, EPHA3, VWF, NCAM2, VCAN, COL1A1, CDH11	223	459	16792	6.06997	6.25829e-15	3.12914e-15	7.2563e-15
GOTERM_CC_DIRECT	GO:0005578~proteinaceous extracellular matrix	28	11.8143	6.30869e-17	CTHRC1, LUM, NPNT, SMOC2, OGN, GPC3, WISP1, CTGF, COL6A3, SPON1, DPT, COL4A4, COL4A3, FLRT2, EFEMP1, FBN1, CHI3L1, COL15A1, MGP, COL5A2, COL5A1, VWF, COL14A1, FBLN5, COL1A2, ADAMTS1, VCAN, ADAMTS2	231	268	18224	8.24242	2.73115e-14	9.10383e-15	1.44329e-13
GOTERM_MF_DIRECT	GO:0005201~extracellular matrix structural constituent	17	7.173	1.33483e-16	COL4A4, COL4A3, COL4A2, COL4A1, LUM, COL3A1, FBN1, COL15A1, CHI3L1, MGP, COL5A2, COL5A1, COL14A1, COL1A2, VCAN, COL1A1, LAMB1	213	67	16881	20.1091	4.35207e-14	4.35207e-14	1.55431e-13
GOTERM_CC_DIRECT	GO:0005576~extracellular region	62	26.1603	2.29435e-15	A2M, CNDP1, PDGFA, IGFBP7, NPNT, FAM3B, GABBR1, FSTL1, JAG1, OGN, SERPINE2, CTGF, GSN, PAPPA, PDGFD, GPX7, FAM150B, LOXL1, PCOLCE2, CTSK, PTGDS, CHST9, COL1A2, VCAN, COL1A1, ADAMTS2, ENPP5, C7, TNC, LUM, COL3A1, CXCL8, DCN, CXCL6, ITGBL1, CCL20, FNDC1, COL6A3, THBS1, LAMB1, THBS2, CRIM1, SPP1, COL4A4, COL4A3, COL4A2, COL4A1, FETUB, FBN1, EFEMP1, COL15A1, CCL19, HGF, FRZB, COL5A2, COL5A1, EPHA3, V…	231	1610	18224	3.03807	5.73541e-13	1.43441e-13	3.01981e-12
KEGG_PATHWAY	hsa04512:ECM-receptor interaction	17	7.173	2.59707e-13	COL4A4, COL4A3, COL4A2, COL4A1, TNC, COL3A1, COL5A2, COL5A1, VWF, ITGB8, COL6A3, COL1A2, COL1A1, THBS1, LAMB1, THBS2, SPP1	111	87	6910	12.1642	4.44055e-11	4.44055e-11	3.17124e-10
GOTERM_CC_DIRECT	GO:0070062~extracellular exosome	77	32.4895	1.85149e-11	A2M, S100A6, IGFBP7, NPNT, FAM3B, GJA1, FSTL1, EDIL3, AQP1, EPCAM, OGN, GPC3, HMCN1, GSN, MS4A1, SEMA3C, LOXL4, PDGFD, FAM129A, GOLM1, CRYAB, MGP, CFTR, CDHR5, PCOLCE2, NEBL, THY1, DHRS2, GLUL, PTGDS, CPE, TACSTD2, AKR1B10, CLIC6, CYBRD1, COL1A2, SLC38A1, FXYD2, C7, MUM1L1, LUM, CLDN11, GPRC5B, ITM2A, HSPA2, ITGB8, KRT7, FAT1, COL6A3, PKD2, LAMB1, THBS1, CRIM1, DPT, SPP1, FLRT2, COL4A2, CACNA2D1,…	231	2811	18224	2.16103	4.55465e-09	9.10931e-10	2.39915e-08
GOTERM_BP_DIRECT	GO:0030574~collagen catabolic process	13	5.48523	3.79704e-11	COL4A4, COL4A3, COL4A2, CTSK, COL4A1, COL3A1, COL6A3, COL1A2, COL15A1, COL1A1, ADAMTS2, COL5A2, COL5A1	223	64	16792	15.2954	5.40699e-08	1.80233e-08	6.26924e-08
KEGG_PATHWAY	hsa04510:Focal adhesion	21	8.86076	5.09687e-11	COL4A4, COL4A3, COL4A2, COL4A1, PDGFA, TNC, COL3A1, HGF, COL5A2, COL5A1, VWF, ITGB8, COL6A3, COL1A2, PDGFRA, COL1A1, PDGFD, THBS1, LAMB1, THBS2, SPP1	111	206	6910	6.3461	8.71564e-09	4.35782e-09	6.22425e-08
GOTERM_CC_DIRECT	GO:0005604~basement membrane	13	5.48523	2.97901e-10	COL4A3, COL4A1, NPNT, TNC, FBN1, CCDC80, COL5A1, SMOC2, HMCN1, ADAMTS1, LAMB1, LOXL1, THBS2	231	79	18224	12.9822	7.32837e-08	1.22139e-08	3.8602e-07
GOTERM_CC_DIRECT	GO:0005788~endoplasmic reticulum lumen	18	7.59494	3.65692e-10	COL4A4, COL4A3, COL4A2, COL4A1, PDGFA, COL3A1, COL15A1, COL5A2, COL5A1, COL14A1, COL6A3, COL1A2, GPX8, COL1A1, GPX7, PDGFD, THBS1, SPON1	231	192	18224	7.3961	8.99603e-08	1.28515e-08	4.73864e-07
GOTERM_MF_DIRECT	GO:0048407~platelet-derived growth factor binding	7	2.95359	1.60259e-09	COL4A1, PDGFA, COL3A1, PDGFRA, COL1A2, COL1A1, COL5A1	213	11	16881	50.4341	6.28216e-07	3.14108e-07	2.22873e-06
KEGG_PATHWAY	hsa04974:Protein digestion and absorption	13	5.48523	1.07881e-08	COL4A4, COL4A3, FXYD2, COL4A2, COL4A1, COL3A1, COL15A1, COL5A2, COL5A1, COL14A1, COL6A3, COL1A2, COL1A1	111	88	6910	9.19636	1.84476e-06	6.1492e-07	1.31743e-05
GOTERM_MF_DIRECT	GO:0008201~heparin binding	15	6.32911	1.44959e-08	OGN, SMOC2, WISP1, SERPINE2, CTGF, FBN1, CCDC80, ADAMTS1, FSTL1, CXCL6, THBS1, THBS2, ABI3BP, COL5A1, PCOLCE2	213	160	16881	7.43002	5.68239e-06	1.89413e-06	2.01596e-05
GOTERM_BP_DIRECT	GO:0030199~collagen fibril organization	9	3.79747	3.55735e-08	COL14A1, LUM, COL3A1, COL1A2, COL1A1, ADAMTS2, COL5A2, COL5A1, DPT	223	39	16792	17.377	5.06554e-05	1.26641e-05	5.87349e-05
KEGG_PATHWAY	hsa04151:PI3K-Akt signaling pathway	22	9.2827	8.05161e-08	COL4A4, COL4A3, COL4A2, COL4A1, PDGFA, TNC, COL3A1, HGF, COL5A2, COL5A1, VWF, ITGB8, COL6A3, COL1A2, PDGFRA, COL1A1, PRKAA2, PDGFD, THBS1, LAMB1, THBS2, SPP1	111	345	6910	3.96971	1.37682e-05	3.44206e-06	9.83255e-05
GOTERM_MF_DIRECT	GO:0005178~integrin binding	12	5.06329	8.39161e-08	COL4A3, VWF, WISP1, CTGF, FBLN5, NPNT, COL3A1, FBN1, EDIL3, THBS1, COL5A1, THY1	213	105	16881	9.05755	3.28946e-05	8.22375e-06	0.000116703
GOTERM_CC_DIRECT	GO:0005581~collagen trimer	11	4.64135	2.46189e-07	COL4A4, COL4A3, CTHRC1, COL14A1, COL3A1, COL6A3, COL1A2, COL15A1, COL1A1, COL5A2, COL5A1	231	92	18224	9.43271	6.05607e-05	7.57029e-06	0.000319011
GOTERM_MF_DIRECT	GO:0005518~collagen binding	9	3.79747	7.91971e-07	VWF, CTSK, COL14A1, PDGFA, LUM, DCN, ANTXR1, ABI3BP, PCOLCE2	213	60	16881	11.888	0.000310405	6.20886e-05	0.00110139
KEGG_PATHWAY	hsa05146:Amoebiasis	11	4.64135	6.14926e-06	COL4A4, COL4A3, COL4A2, COL4A1, COL3A1, COL1A2, CXCL8, COL1A1, LAMB1, COL5A2, COL5A1	111	106	6910	6.46014	0.00105097	0.000210283	0.00750916
GOTERM_MF_DIRECT	GO:0005509~calcium ion binding	25	10.5485	1.21618e-05	S100A6, RASEF, ENPP2, NPNT, FBN1, EFEMP1, PCDH9, MGP, FSTL1, CDHR5, JAG1, EDIL3, PCDH17, SMOC2, HMCN1, SULF2, SLC25A24, GSN, FAT1, FBLN5, PKD2, VCAN, THBS1, THBS2, CDH11	213	717	16881	2.76337	0.00475613	0.000794263	0.0169122
GOTERM_BP_DIRECT	GO:0071230~cellular response to amino acid stimulus	7	2.95359	3.40775e-05	COL4A1, COL3A1, NTRK2, COL1A2, PDGFD, COL1A1, COL5A2	223	47	16792	11.215	0.0473685	0.00965848	0.05625
GOTERM_CC_DIRECT	GO:0005587~collagen type IV trimer	4	1.68776	3.85873e-05	COL4A4, COL4A3, COL4A2, COL4A1	231	6	18224	52.5945	0.00944776	0.00105418	0.0499899
GOTERM_BP_DIRECT	GO:0001501~skeletal system development	10	4.21941	8.69697e-05	COL3A1, FBN1, COL1A2, SOX4, VCAN, COL1A1, FRZB, SOX9, COL5A2, CDH11	223	137	16792	5.49638	0.116488	0.0204301	0.143498
GOTERM_BP_DIRECT	GO:0014068~positive regulation of phosphatidylinositol 3-kinase signaling	7	2.95359	0.000215116	PDGFA, NTRK2, PDGFRA, PDGFD, DCN, HGF, SOX9	223	65	16792	8.10928	0.263877	0.0428215	0.354582
GOTERM_BP_DIRECT	GO:0030334~regulation of cell migration	7	2.95359	0.00043717	PLXNC1, SERPINE2, ENPP2, DPYSL3, JAG1, NEXN, THY1	223	74	16792	7.12302	0.463488	0.0748814	0.719363
GOTERM_BP_DIRECT	GO:0007528~neuromuscular junction development	5	2.1097	0.000474498	COL4A1, ANK3, TNC, NTRK2, PDZRN3	223	28	16792	13.4465	0.491274	0.0723437	0.780561
GOTERM_CC_DIRECT	GO:0005614~interstitial matrix	4	1.68776	0.000516825	SMOC2, TNC, CCDC80, ABI3BP	231	13	18224	24.2744	0.119418	0.0126367	0.667636
GOTERM_CC_DIRECT	GO:0009986~cell surface	18	7.59494	0.000545664	PDGFA, CRYAB, CD109, CFTR, GPRC5B, PROM1, EPCAM, SRPX, HSPA2, SULF2, ROBO1, ITGB8, ANK3, BACE2, KCNN2, ANTXR1, CD24, THBS1	231	542	18224	2.62002	0.125646	0.0121322	0.704768
GOTERM_BP_DIRECT	GO:0071356~cellular response to tumor necrosis factor	8	3.37553	0.000645647	CCL20, NPNT, CHI3L1, CXCL8, CCL19, FABP4, COL1A1, THBS1	223	110	16792	5.4764	0.601361	0.0878673	1.0607
GOTERM_CC_DIRECT	GO:0031091~platelet alpha granule	4	1.68776	0.000651668	VWF, SERPINE2, THBS1, THBS2	231	14	18224	22.5405	0.148165	0.0132746	0.841148
GOTERM_CC_DIRECT	GO:0030018~Z disc	8	3.37553	0.000749635	CRYAB, ANK3, KCNN2, SYNPO2, NEXN, PALLD, HOMER1, NEBL	231	118	18224	5.34859	0.168463	0.0140905	0.967034
GOTERM_BP_DIRECT	GO:0030335~positive regulation of cell migration	10	4.21941	0.000779928	PDGFA, PODXL, PDGFRA, SEMA3C, PDGFD, COL1A1, HGF, THBS1, MCAM, LAMB1	223	184	16792	4.09242	0.670787	0.0960711	1.27997
GOTERM_BP_DIRECT	GO:0043588~skin development	5	2.1097	0.00101015	PDGFA, COL3A1, ADAMTS2, COL5A2, COL5A1	223	34	16792	11.0736	0.762877	0.113019	1.65483
GOTERM_BP_DIRECT	GO:0051216~cartilage development	6	2.53165	0.00108191	TYMS, SULF2, ITGB8, LUM, CHI3L1, SOX9	223	59	16792	7.65767	0.785935	0.111815	1.77142
GOTERM_BP_DIRECT	GO:0045669~positive regulation of osteoblast differentiation	6	2.53165	0.00116774	CTHRC1, NPNT, GJA1, ID4, JAG1, HGF	223	60	16792	7.53004	0.81059	0.112055	1.91068
GOTERM_BP_DIRECT	GO:0016525~negative regulation of angiogenesis	6	2.53165	0.0013544	COL4A3, COL4A2, RGCC, DCN, THBS1, THBS2	223	62	16792	7.28714	0.854848	0.120731	2.21289
GOTERM_MF_DIRECT	GO:0005520~insulin-like growth factor binding	4	1.68776	0.00138636	WISP1, CTGF, IGFBP7, CRIM1	213	18	16881	17.6119	0.41948	0.0747489	1.91086
GOTERM_BP_DIRECT	GO:0010811~positive regulation of cell-substrate adhesion	5	2.1097	0.00154286	SMOC2, NPNT, CCDC80, EDIL3, ABI3BP	223	38	16792	9.90795	0.889056	0.128397	2.51714
GOTERM_BP_DIRECT	GO:0016477~cell migration	9	3.79747	0.00207747	CTHRC1, CTGF, FAT1, PODXL, CD24, THBS1, PALLD, COL5A1, EPHA3	223	172	16792	3.94014	0.948253	0.159871	3.37537
GOTERM_CC_DIRECT	GO:0016323~basolateral plasma membrane	9	3.79747	0.00209683	KCNJ16, EPCAM, FXYD2, ANK3, AQP4, ABCC4, HEPH, CFTR, AQP1	231	180	18224	3.94459	0.403312	0.036211	2.68326
GOTERM_BP_DIRECT	GO:0070374~positive regulation of ERK1 and ERK2 cascade	9	3.79747	0.00231352	CCL20, PDGFA, CTGF, NPNT, PDGFRA, CHI3L1, CCL19, PDGFD, FAM150B	223	175	16792	3.87259	0.963053	0.167429	3.75204
GOTERM_BP_DIRECT	GO:0071300~cellular response to retinoic acid	6	2.53165	0.00232642	TNC, COL1A1, SOX9, AQP1, FZD7, EPHA3	223	70	16792	6.45432	0.963727	0.160175	3.77259
GOTERM_BP_DIRECT	GO:0038063~collagen-activated tyrosine kinase receptor signaling pathway	3	1.26582	0.00252023	COL4A3, COL4A2, COL4A1	223	6	16792	37.6502	0.972494	0.164452	4.08077
GOTERM_BP_DIRECT	GO:0022617~extracellular matrix disassembly	6	2.53165	0.00333197	CTSK, A2M, GSN, FBN1, DCN, SPP1	223	76	16792	5.94477	0.991371	0.202535	5.36148
GOTERM_CC_DIRECT	GO:1903561~extracellular vesicle	5	2.1097	0.00361325	OGN, SERPINE2, SLC12A2, COL6A3, EDIL3	231	50	18224	7.88918	0.589537	0.0576368	4.58222
GOTERM_BP_DIRECT	GO:0071560~cellular response to transforming growth factor beta stimulus	5	2.1097	0.00395528	COL4A2, FBN1, PDGFD, COL1A1, SOX9	223	49	16792	7.68372	0.996459	0.226262	6.33396
GOTERM_MF_DIRECT	GO:0001968~fibronectin binding	4	1.68776	0.00410296	CTSK, CTGF, CCDC80, THBS1	213	26	16881	12.1928	0.800446	0.182463	5.55735
GOTERM_BP_DIRECT	GO:0001558~regulation of cell growth	6	2.53165	0.00415563	FXYD2, WISP1, CTGF, FBLN5, IGFBP7, CRIM1	223	80	16792	5.64753	0.997341	0.227268	6.64455
GOTERM_BP_DIRECT	GO:0001503~ossification	6	2.53165	0.00415563	CTGF, MGP, SOX9, COL5A2, SPP1, CDH11	223	80	16792	5.64753	0.997341	0.227268	6.64455
GOTERM_BP_DIRECT	GO:0042060~wound healing	6	2.53165	0.00415563	CCL20, PDGFA, TNC, COL3A1, PDGFRA, DCN	223	80	16792	5.64753	0.997341	0.227268	6.64455
GOTERM_BP_DIRECT	GO:0001504~neurotransmitter uptake	3	1.26582	0.00462299	GLUL, SLC38A1, SNAP25	223	8	16792	28.2377	0.998637	0.240377	7.36531
KEGG_PATHWAY	hsa04976:Bile secretion	6	2.53165	0.00467111	FXYD2, KCNN2, AQP4, ABCC4, CFTR, AQP1	111	69	6910	5.41324	0.550955	0.124919	5.5573
GOTERM_BP_DIRECT	GO:0008652~cellular amino acid biosynthetic process	4	1.68776	0.0047357	BCAT1, GLUL, GLS, OAT	223	26	16792	11.5847	0.99884	0.236915	7.53834
GOTERM_BP_DIRECT	GO:0006633~fatty acid biosynthetic process	5	2.1097	0.00490092	ACSM3, CH25H, ELOVL7, PRKAA2, SCD5	223	52	16792	7.24043	0.999085	0.235918	7.79145
GOTERM_CC_DIRECT	GO:0031093~platelet alpha granule lumen	5	2.1097	0.00509549	VWF, A2M, PDGFA, HGF, THBS1	231	55	18224	7.17198	0.715407	0.0755381	6.40527
GOTERM_MF_DIRECT	GO:0051371~muscle alpha-actinin binding	3	1.26582	0.0053322	PKD2, SYNPO2, PALLD	213	9	16881	26.4178	0.87703	0.207742	7.16566
GOTERM_BP_DIRECT	GO:0010951~negative regulation of endopeptidase activity	7	2.95359	0.00543872	COL4A3, A2M, SERPINE2, FETUB, COL6A3, CD109, CRIM1	223	121	16792	4.35622	0.999576	0.249957	8.61081
GOTERM_BP_DIRECT	GO:0055114~oxidation-reduction process	17	7.173	0.00550729	CYP2C19, CYP1A2, MOXD1, MSRB3, MTHFD2, DHRS2, AKR1B10, CH25H, RRM2, CYBRD1, ABCC4, HEPH, LOXL4, GPX8, SCD5, GPX7, LOXL1	223	592	16792	2.16234	0.999616	0.244865	8.71478
GOTERM_BP_DIRECT	GO:0048146~positive regulation of fibroblast proliferation	5	2.1097	0.00560911	S100A6, PDGFA, PDGFRA, PDGFD, AQP1	223	54	16792	6.97226	0.999668	0.24134	8.86898
GOTERM_BP_DIRECT	GO:0032836~glomerular basement membrane development	3	1.26582	0.00589225	COL4A4, COL4A3, SULF2	223	9	16792	25.1001	0.999779	0.244604	9.29647
KEGG_PATHWAY	hsa04978:Mineral absorption	5	2.1097	0.00593421	FXYD2, MT1M, CYBRD1, HEPH, MT1F	111	46	6910	6.76655	0.638601	0.13532	7.01053
GOTERM_CC_DIRECT	GO:0009925~basal plasma membrane	4	1.68776	0.00626535	TACSTD2, ANK3, PKD2, AQP1	231	30	18224	10.5189	0.786928	0.0869352	7.82135
GOTERM_BP_DIRECT	GO:0030203~glycosaminoglycan metabolic process	4	1.68776	0.00646494	GPC3, CHST9, VCAN, DCN	223	29	16792	10.3863	0.999903	0.25765	10.1554
GOTERM_BP_DIRECT	GO:0010976~positive regulation of neuron projection development	6	2.53165	0.00652342	STMN2, NTRK2, DPYSL3, FAM150B, GPRC5B, EPHA3	223	89	16792	5.07643	0.99991	0.252666	10.2426
GOTERM_BP_DIRECT	GO:0060174~limb bud formation	3	1.26582	0.00730146	SOX4, SEMA3C, SOX9	223	10	16792	22.5901	0.999971	0.271104	11.3962
GOTERM_BP_DIRECT	GO:0009612~response to mechanical stimulus	5	2.1097	0.00767028	TNC, COL3A1, CHI3L1, DCN, THBS1	223	59	16792	6.38139	0.999983	0.275655	11.9382
GOTERM_MF_DIRECT	GO:0043394~proteoglycan binding	3	1.26582	0.00801285	CTSK, THBS1, COL5A1	213	11	16881	21.6146	0.957306	0.27048	10.5852
GOTERM_BP_DIRECT	GO:0001775~cell activation	3	1.26582	0.00884671	PDGFA, PDGFRA, CD24	223	11	16792	20.5365	0.999997	0.303395	13.6461
GOTERM_BP_DIRECT	GO:0009611~response to wounding	5	2.1097	0.00963767	VWF, SULF2, PDGFA, CTGF, TNC	223	63	16792	5.97623	0.999999	0.318237	14.7769
GOTERM_BP_DIRECT	GO:0001525~angiogenesis	9	3.79747	0.00976863	THSD7A, COL4A2, PDGFA, CTGF, COL15A1, CXCL8, JAG1, MCAM, THY1	223	223	16792	3.03903	0.999999	0.314638	14.9628
GOTERM_BP_DIRECT	GO:0030208~dermatan sulfate biosynthetic process	3	1.26582	0.0105242	DSEL, VCAN, DCN	223	12	16792	18.8251	1	0.32731	16.0278
GOTERM_BP_DIRECT	GO:0060326~cell chemotaxis	5	2.1097	0.0107335	CCL20, PDGFRA, CCL19, CXCL6, HGF	223	65	16792	5.79234	1	0.325666	16.3206
GOTERM_CC_DIRECT	GO:0016324~apical plasma membrane	10	4.21941	0.0118509	EPCAM, PROM1, SLC12A2, PODXL, GJA1, CDHR5, CFTR, JAG1, AQP1, THY1	231	291	18224	2.71106	0.946749	0.150349	14.314
GOTERM_BP_DIRECT	GO:0002576~platelet degranulation	6	2.53165	0.0118709	VWF, A2M, PDGFA, ABCC4, HGF, THBS1	223	103	16792	4.38643	1	0.346316	17.8949
GOTERM_BP_DIRECT	GO:0003215~cardiac right ventricle morphogenesis	3	1.26582	0.0123302	SOX4, SEMA3C, JAG1	223	13	16792	17.377	1	0.350083	18.5229
GOTERM_BP_DIRECT	GO:0001649~osteoblast differentiation	6	2.53165	0.01234	IFT80, TNC, GJA1, VCAN, COL1A1, SPP1	223	104	16792	4.34426	1	0.343602	18.5362
GOTERM_CC_DIRECT	GO:0005886~plasma membrane	68	28.692	0.0123508	KCNJ16, ENAH, GABRB3, GABBR1, AQP4, GJA1, JAG1, AQP1, EPCAM, CHIC1, FRMD6, GPC3, ROBO1, CTGF, ANK3, GSN, SCN7A, NALCN, FAM129A, PCDH9, CFTR, CDHR5, PALLD, THY1, NCAM2, CPE, CLIC6, CYBRD1, PDGFRA, SLC38A1, EMP1, PMEPA1, ENPP5, FXYD2, PLXNC1, ENPP2, CD109, CLDN10, CLDN11, GPRC5B, ITM2A, PAQR5, ITGB8, FAT1, PKD2, SNAP25, CRIM1, FLRT2, CACNA2D1, CAP2, LGALS3, SLC12A2, PODXL, MAP1B, MCAM, PCDH17, FZD7…	231	4121	18224	1.30178	0.952982	0.148629	14.8741
GOTERM_BP_DIRECT	GO:0009749~response to glucose	5	2.1097	0.012523	COL4A3, GLUL, CTGF, GJA1, THBS1	223	68	16792	5.5368	1	0.3412	18.7851
GOTERM_MF_DIRECT	GO:0005198~structural molecule activity	9	3.79747	0.0129761	COL4A3, KRT7, MAP2, MAP1B, COL15A1, CLDN10, CLDN11, JAG1, LAMB1	213	247	16881	2.88778	0.994024	0.372147	16.6099
GOTERM_BP_DIRECT	GO:0001568~blood vessel development	4	1.68776	0.0136849	COL1A2, COL1A1, ANTXR1, COL5A1	223	38	16792	7.92636	1	0.359784	20.3485
GOTERM_BP_DIRECT	GO:0071347~cellular response to interleukin-1	5	2.1097	0.0144929	CCL20, CHI3L1, CXCL8, CCL19, SOX9	223	71	16792	5.30285	1	0.369962	21.419
GOTERM_MF_DIRECT	GO:0005161~platelet-derived growth factor receptor binding	3	1.26582	0.0148013	PDGFA, PDGFRA, PDGFD	213	15	16881	15.8507	0.997107	0.385608	18.729
GOTERM_CC_DIRECT	GO:0030426~growth cone	6	2.53165	0.0158767	STMN2, PCDH9, DPYSL3, PALLD, SNAP25, THY1	231	116	18224	4.08061	0.980493	0.178686	18.729
GOTERM_CC_DIRECT	GO:0030027~lamellipodium	7	2.95359	0.0162626	ENAH, STMN2, FAT1, PODXL, PKD2, DPYSL3, PALLD	231	160	18224	3.45152	0.982288	0.174751	19.141
GOTERM_BP_DIRECT	GO:0008285~negative regulation of cell proliferation	12	5.06329	0.0165686	COL4A3, DHRS2, SERPINE2, IGFBP7, RGCC, PTPN14, PKD2, CXCL8, SOX4, ADAMTS1, FRZB, DPT	223	396	16792	2.28183	1	0.403814	24.1076
GOTERM_MF_DIRECT	GO:0008083~growth factor activity	7	2.95359	0.016611	OGN, PDGFA, CTGF, EFEMP1, PDGFD, JAG1, HGF	213	162	16881	3.42453	0.998593	0.396551	20.7807
GOTERM_BP_DIRECT	GO:0001658~branching involved in ureteric bud morphogenesis	4	1.68776	0.0179212	GPC3, NPNT, PKD2, SOX9	223	42	16792	7.17147	1	0.421837	25.8128
GOTERM_BP_DIRECT	GO:0030324~lung development	5	2.1097	0.0181913	GPC3, CTGF, CHI3L1, CYP1A2, ADAMTS2	223	76	16792	4.95398	1	0.419952	26.1489
GOTERM_MF_DIRECT	GO:0008237~metallopeptidase activity	5	2.1097	0.0189771	CNDP1, PAPPA, THOP1, ADAMTS1, ADAMTS2	213	81	16881	4.89219	0.999453	0.415188	23.3907
GOTERM_MF_DIRECT	GO:0005539~glycosaminoglycan binding	3	1.26582	0.0210428	SERPINE2, VCAN, DCN	213	18	16881	13.2089	0.99976	0.42638	25.6039
GOTERM_MF_DIRECT	GO:0008092~cytoskeletal protein binding	4	1.68776	0.0223217	ANK3, EPB41L4A, PKD2, NEBL	213	48	16881	6.60446	0.999857	0.424823	26.9441
GOTERM_CC_DIRECT	GO:0042383~sarcolemma	5	2.1097	0.0226087	ANK3, COL6A3, SSPN, AQP1, DTNA	231	85	18224	4.64069	0.996395	0.225632	25.6455
GOTERM_CC_DIRECT	GO:0043202~lysosomal lumen	5	2.1097	0.0226087	OGN, GPC3, LUM, VCAN, DCN	231	85	18224	4.64069	0.996395	0.225632	25.6455
GOTERM_MF_DIRECT	GO:0030165~PDZ domain binding	5	2.1097	0.0230879	GJA1, CFTR, FZD7, CRIM1, DTNA	213	86	16881	4.60776	0.999894	0.416448	27.7364
GOTERM_CC_DIRECT	GO:0030424~axon	8	3.37553	0.0230955	NCAM2, ROBO1, STMN2, CRYAB, SLC38A1, PALLD, HOMER1, DTNA	231	222	18224	2.84295	0.996811	0.221136	26.124
GOTERM_BP_DIRECT	GO:0060384~innervation	3	1.26582	0.0231623	SERPINE2, SULF2, GABRB3	223	18	16792	12.5501	1	0.493911	32.086
GOTERM_CC_DIRECT	GO:0031528~microvillus membrane	3	1.26582	0.0235482	PROM1, PODXL, CDHR5	231	19	18224	12.4566	0.997155	0.216714	26.5664
GOTERM_MF_DIRECT	GO:0008009~chemokine activity	4	1.68776	0.0235627	CCL20, CXCL8, CCL19, CXCL6	213	49	16881	6.46968	0.999913	0.405054	28.2232
GOTERM_CC_DIRECT	GO:0031090~organelle membrane	5	2.1097	0.0243799	FLRT2, CYP3A7, CYP2C19, FMO2, CYP1A2	231	87	18224	4.53401	0.997693	0.215627	27.3727
GOTERM_CC_DIRECT	GO:0005584~collagen type I trimer	2	0.843882	0.0250828	COL1A2, COL1A1	231	2	18224	78.8918	0.998068	0.213647	28.0479
GOTERM_BP_DIRECT	GO:0045926~negative regulation of growth	3	1.26582	0.025665	MT1M, GPC3, MT1F	223	19	16792	11.8895	1	0.523117	34.9025
GOTERM_BP_DIRECT	GO:0072139~glomerular parietal epithelial cell differentiation	2	0.843882	0.0262672	PROM1, CD24	223	2	16792	75.3004	1	0.524422	35.5636
GOTERM_BP_DIRECT	GO:1903225~negative regulation of endodermal cell differentiation	2	0.843882	0.0262672	COL5A2, COL5A1	223	2	16792	75.3004	1	0.524422	35.5636
GOTERM_CC_DIRECT	GO:0005925~focal adhesion	11	4.64135	0.0270955	FLRT2, ENAH, GSN, FAT1, TNC, GJA1, SYNPO2, NEXN, MCAM, PALLD, THY1	231	391	18224	2.21946	0.998838	0.221414	29.9491
GOTERM_CC_DIRECT	GO:0016328~lateral plasma membrane	4	1.68776	0.0292779	EPCAM, TACSTD2, ANK3, GJA1	231	53	18224	5.9541	0.999331	0.229772	31.9582
GOTERM_BP_DIRECT	GO:0007160~cell-matrix adhesion	5	2.1097	0.0314585	ITGB8, CTGF, FBLN5, NPNT, COL3A1	223	90	16792	4.18336	1	0.583272	41.0071
GOTERM_MF_DIRECT	GO:0005507~copper ion binding	4	1.68776	0.0332754	HEPH, LOXL4, LOXL1, MOXD1	213	56	16881	5.66097	0.999998	0.502523	37.5396
GOTERM_CC_DIRECT	GO:0005796~Golgi lumen	5	2.1097	0.0333703	OGN, GPC3, LUM, VCAN, DCN	231	96	18224	4.10895	0.999763	0.250166	35.5829
GOTERM_BP_DIRECT	GO:0090103~cochlea morphogenesis	3	1.26582	0.0337869	CTHRC1, FRZB, SOX9	223	22	16792	10.2682	1	0.602863	43.3055
GOTERM_BP_DIRECT	GO:0001502~cartilage condensation	3	1.26582	0.0337869	CTGF, MGP, SOX9	223	22	16792	10.2682	1	0.602863	43.3055
GOTERM_MF_DIRECT	GO:0004867~serine-type endopeptidase inhibitor activity	5	2.1097	0.0339128	A2M, SERPINE2, COL6A3, CD109, CRIM1	213	97	16881	4.08523	0.999999	0.491466	38.1099
GOTERM_CC_DIRECT	GO:0005887~integral component of plasma membrane	27	11.3924	0.0341853	KCNJ16, PLXNC1, GABRB3, ENPP2, GABBR1, AQP4, GJA1, JAG1, AQP1, EPCAM, GPC3, ROBO1, FAT1, PKD2, MS4A1, GOLM1, FLRT2, SLC12A2, PODXL, SSPN, THY1, EPHA3, PROM1, TACSTD2, NTRK2, PDGFRA, SLC38A1	231	1415	18224	1.50536	0.999808	0.248153	36.2832
GOTERM_BP_DIRECT	GO:0007507~heart development	7	2.95359	0.034942	ROBO1, COL3A1, FBN1, PKD2, SOX4, GJA1, BICC1	223	183	16792	2.88035	1	0.608558	44.4142
GOTERM_MF_DIRECT	GO:0004497~monooxygenase activity	4	1.68776	0.0363775	CYP3A7, CYP2C19, FMO2, CYP1A2	213	58	16881	5.46576	1	0.499279	40.27
GOTERM_MF_DIRECT	GO:0048306~calcium-dependent protein binding	4	1.68776	0.0363775	S100A6, A2M, STMN2, SNAP25	213	58	16881	5.46576	1	0.499279	40.27
GOTERM_CC_DIRECT	GO:0005588~collagen type V trimer	2	0.843882	0.0373883	COL5A2, COL5A1	231	3	18224	52.5945	0.999915	0.260945	38.9677
GOTERM_CC_DIRECT	GO:0005589~collagen type VI trimer	2	0.843882	0.0373883	COL6A3, DCN	231	3	18224	52.5945	0.999915	0.260945	38.9677
GOTERM_BP_DIRECT	GO:0048592~eye morphogenesis	2	0.843882	0.039142	COL5A2, COL5A1	223	3	16792	50.2003	1	0.644343	48.2764
GOTERM_BP_DIRECT	GO:2000768~positive regulation of nephron tubule epithelial cell differentiation	2	0.843882	0.039142	PROM1, CD24	223	3	16792	50.2003	1	0.644343	48.2764
GOTERM_BP_DIRECT	GO:0045880~positive regulation of smoothened signaling pathway	3	1.26582	0.039682	GPC3, IFT80, DCDC2	223	24	16792	9.41256	1	0.642859	48.7543
GOTERM_MF_DIRECT	GO:0008395~steroid hydroxylase activity	3	1.26582	0.0418732	CYP3A7, CYP2C19, CH25H	213	26	16881	9.14464	1	0.53335	44.8369
GOTERM_MF_DIRECT	GO:0050840~extracellular matrix binding	3	1.26582	0.0418732	DCN, THBS1, SPP1	213	26	16881	9.14464	1	0.53335	44.8369
GOTERM_BP_DIRECT	GO:0007229~integrin-mediated signaling pathway	5	2.1097	0.0423458	ITGB8, CTGF, COL3A1, ADAMTS1, ITGBL1	223	99	16792	3.80305	1	0.660728	51.0514
KEGG_PATHWAY	hsa05144:Malaria	4	1.68776	0.042622	CXCL8, HGF, THBS1, THBS2	111	49	6910	5.08182	0.999418	0.605852	41.252
GOTERM_BP_DIRECT	GO:0030206~chondroitin sulfate biosynthetic process	3	1.26582	0.0427648	CHST9, VCAN, DCN	223	25	16792	9.03605	1	0.65804	51.4039
GOTERM_CC_DIRECT	GO:0043209~myelin sheath	6	2.53165	0.0437769	GLUL, HSPA2, CRYAB, CLDN11, SNAP25, THY1	231	152	18224	3.11415	0.999983	0.291158	44.013
GOTERM_BP_DIRECT	GO:0016337~single organismal cell-cell adhesion	5	2.1097	0.0450197	COL14A1, FAT1, CD24, SOX9, THY1	223	101	16792	3.72774	1	0.671032	53.2598
GOTERM_BP_DIRECT	GO:0061098~positive regulation of protein tyrosine kinase activity	3	1.26582	0.0459339	CD24, FAM150B, GPRC5B	223	26	16792	8.68851	1	0.672411	53.9931
KEGG_PATHWAY	hsa04727:GABAergic synapse	5	2.1097	0.046089	GLUL, GABRB3, GLS, GABBR1, SLC38A1	111	85	6910	3.6619	0.999687	0.59201	43.798
KEGG_PATHWAY	hsa05222:Small cell lung cancer	5	2.1097	0.046089	COL4A4, COL4A3, COL4A2, COL4A1, LAMB1	111	85	6910	3.6619	0.999687	0.59201	43.798
GOTERM_BP_DIRECT	GO:0008284~positive regulation of cell proliferation	12	5.06329	0.0462252	EPCAM, PDGFA, CTGF, TNC, NTRK2, PDGFRA, SOX4, ID4, PDGFD, HGF, THBS1, SOX9	223	466	16792	1.93907	1	0.668733	54.2245
GOTERM_BP_DIRECT	GO:0017144~drug metabolic process	3	1.26582	0.0491865	CYP2C19, FMO2, CYP1A2	223	27	16792	8.36672	1	0.686022	56.5154
GOTERM_BP_DIRECT	GO:0042476~odontogenesis	3	1.26582	0.0491865	COL1A2, AQP1, LAMB1	223	27	16792	8.36672	1	0.686022	56.5154
GOTERM_CC_DIRECT	GO:0097386~glial cell projection	2	0.843882	0.0495392	GLUL, SCN7A	231	4	18224	39.4459	0.999996	0.315285	48.2308
GOTERM_MF_DIRECT	GO:0042802~identical protein binding	16	6.75105	0.0509043	BCAT1, CAP2, CRYAB, CLDN10, CLDN11, HGF, RASSF3, VWF, GLUL, ROBO1, COL1A2, PKD2, COL1A1, THBS1, OAT, THRSP	213	749	16881	1.693	1	0.589528	51.6441
KEGG_PATHWAY	hsa04964:Proximal tubule bicarbonate reclamation	3	1.26582	0.0511295	FXYD2, GLS, AQP1	111	23	6910	8.11986	0.999873	0.592396	47.3191
GOTERM_BP_DIRECT	GO:1901203~positive regulation of extracellular matrix assembly	2	0.843882	0.0518474	RGCC, SOX9	223	4	16792	37.6502	1	0.699825	58.4816
GOTERM_BP_DIRECT	GO:2000048~negative regulation of cell-cell adhesion mediated by cadherin	2	0.843882	0.0518474	EPCAM, RGCC	223	4	16792	37.6502	1	0.699825	58.4816
GOTERM_BP_DIRECT	GO:0048050~post-embryonic eye morphogenesis	2	0.843882	0.0518474	EFEMP1, FBN1	223	4	16792	37.6502	1	0.699825	58.4816
GOTERM_BP_DIRECT	GO:0061333~renal tubule morphogenesis	2	0.843882	0.0518474	COL4A1, PKD2	223	4	16792	37.6502	1	0.699825	58.4816
GOTERM_BP_DIRECT	GO:0007267~cell-cell signaling	8	3.37553	0.0519734	WISP1, CCL20, PDGFA, CTGF, FAT1, GJA1, CHST4, CXCL6	223	254	16792	2.37167	1	0.69503	58.5726
GOTERM_CC_DIRECT	GO:0048471~perinuclear region of cytoplasm	14	5.90717	0.0520109	S100A6, MT1M, STMN2, RASEF, CHI3L1, KIAA0101, PTGDS, CTGF, FAT1, HEPH, LAMB1, SNAP25, SPP1, MT1F	231	621	18224	1.77856	0.999998	0.320538	49.9484
GOTERM_CC_DIRECT	GO:0045211~postsynaptic membrane	7	2.95359	0.0522818	GABRB3, ANK3, NTRK2, GABBR1, SSPN, HOMER1, KCTD12	231	211	18224	2.61726	0.999998	0.314373	50.1334
GOTERM_BP_DIRECT	GO:0014047~glutamate secretion	3	1.26582	0.0525199	GLS, NTRK2, SNAP25	223	28	16792	8.06791	1	0.693306	58.9652
GOTERM_BP_DIRECT	GO:0006955~immune response	11	4.64135	0.0533008	C7, CCL20, ENPP2, CXCL8, CCL19, SEMA3C, IL32, CHST4, GEM, CXCL6, THBS1	223	421	16792	1.96747	1	0.69327	59.5201
GOTERM_BP_DIRECT	GO:0006936~muscle contraction	5	2.1097	0.0535956	CRYAB, GJA1, SCN7A, TPM2, SSPN	223	107	16792	3.51871	1	0.689871	59.7276
KEGG_PATHWAY	hsa04611:Platelet activation	6	2.53165	0.0558837	VWF, COL3A1, COL1A2, COL1A1, COL5A2, COL5A1	111	130	6910	2.87318	0.999946	0.590966	50.4534
GOTERM_BP_DIRECT	GO:0048008~platelet-derived growth factor receptor signaling pathway	3	1.26582	0.0559314	PDGFA, PDGFRA, PDGFD	223	29	16792	7.7897	1	0.700398	61.3377
GOTERM_BP_DIRECT	GO:0001937~negative regulation of endothelial cell proliferation	3	1.26582	0.0559314	RGCC, GJA1, THBS1	223	29	16792	7.7897	1	0.700398	61.3377
GOTERM_MF_DIRECT	GO:0017147~Wnt-protein binding	3	1.26582	0.0575312	CTHRC1, FRZB, FZD7	213	31	16881	7.6697	1	0.620078	56.1338
GOTERM_BP_DIRECT	GO:0007156~homophilic cell adhesion via plasma membrane adhesion molecules	6	2.53165	0.0589336	ROBO1, FAT1, PCDH9, CDHR5, PCDH17, CDH11	223	158	16792	2.85951	1	0.714515	63.3184
GOTERM_BP_DIRECT	GO:0010628~positive regulation of gene expression	8	3.37553	0.0594916	ITGB8, GSN, CTGF, ANK3, TNC, RGCC, NTRK2, GJA1	223	262	16792	2.29925	1	0.712842	63.6759
GOTERM_MF_DIRECT	GO:0005244~voltage-gated ion channel activity	3	1.26582	0.0608728	CLIC6, PKD2, NALCN	213	32	16881	7.43002	1	0.626476	58.248
GOTERM_MF_DIRECT	GO:0030023~extracellular matrix constituent conferring elasticity	2	0.843882	0.0612421	COL4A1, FBN1	213	5	16881	31.7014	1	0.61435	58.4758
GOTERM_MF_DIRECT	GO:0016641~oxidoreductase activity, acting on the CH-NH2 group of donors, oxygen as acceptor	2	0.843882	0.0612421	LOXL4, LOXL1	213	5	16881	31.7014	1	0.61435	58.4758
GOTERM_BP_DIRECT	GO:0043154~negative regulation of cysteine-type endopeptidase activity involved in apoptotic process	4	1.68776	0.0632932	CRYAB, HGF, THBS1, AQP1	223	69	16792	4.36524	1	0.730553	66.0256
GOTERM_BP_DIRECT	GO:0010757~negative regulation of plasminogen activation	2	0.843882	0.0643855	SERPINE2, THBS1	223	5	16792	30.1202	1	0.73186	66.6738
GOTERM_BP_DIRECT	GO:0015696~ammonium transport	2	0.843882	0.0643855	SLC12A2, AQP1	223	5	16792	30.1202	1	0.73186	66.6738
GOTERM_BP_DIRECT	GO:0032387~negative regulation of intracellular transport	2	0.843882	0.0643855	CRYAB, MAP1B	223	5	16792	30.1202	1	0.73186	66.6738
GOTERM_BP_DIRECT	GO:0090090~negative regulation of canonical Wnt signaling pathway	6	2.53165	0.0654956	CTHRC1, DKK3, GPC3, BICC1, FRZB, SOX9	223	163	16792	2.7718	1	0.733231	67.3207
GOTERM_BP_DIRECT	GO:0030855~epithelial cell differentiation	4	1.68776	0.0655086	COL4A1, LGALS3, TAGLN, EHF	223	70	16792	4.30288	1	0.728498	67.3282
GOTERM_BP_DIRECT	GO:0045766~positive regulation of angiogenesis	5	2.1097	0.0663093	CHI3L1, CXCL8, HGF, THBS1, AQP1	223	115	16792	3.27393	1	0.728196	67.7873
GOTERM_BP_DIRECT	GO:0071260~cellular response to mechanical stimulus	4	1.68776	0.0677593	GJA1, COL1A1, SOX9, AQP1	223	71	16792	4.24228	1	0.731433	68.6034
GOTERM_BP_DIRECT	GO:0070098~chemokine-mediated signaling pathway	4	1.68776	0.0677593	CCL20, CXCL8, CCL19, CXCL6	223	71	16792	4.24228	1	0.731433	68.6034
GOTERM_BP_DIRECT	GO:0007568~aging	6	2.53165	0.0682508	TYMS, SLC12A2, CTGF, CRYAB, COL3A1, DCN	223	165	16792	2.7382	1	0.72946	68.8756
GOTERM_CC_DIRECT	GO:0016529~sarcoplasmic reticulum	3	1.26582	0.0683464	CACNA2D1, ANK3, THBS1	231	34	18224	6.96104	1	0.383539	60.0424
GOTERM_MF_DIRECT	GO:0030674~protein binding, bridging	4	1.68776	0.0727448	FLRT2, COL14A1, ANK3, COL1A2	213	77	16881	4.11707	1	0.665973	65.0185
GOTERM_MF_DIRECT	GO:0005372~water transmembrane transporter activity	2	0.843882	0.073035	AQP4, AQP1	213	6	16881	26.4178	1	0.654151	65.1704
GOTERM_BP_DIRECT	GO:0050919~negative chemotaxis	3	1.26582	0.0740701	FLRT2, PDGFA, SEMA3C	223	34	16792	6.64416	1	0.754622	71.9343
KEGG_PATHWAY	hsa00590:Arachidonic acid metabolism	4	1.68776	0.0755991	PTGDS, CYP2C19, GPX8, GPX7	111	62	6910	4.01627	0.999999	0.67378	61.7096
GOTERM_BP_DIRECT	GO:0046483~heterocycle metabolic process	2	0.843882	0.0767585	CYP2C19, CYP1A2	223	6	16792	25.1001	1	0.762973	73.2499
GOTERM_BP_DIRECT	GO:0090279~regulation of calcium ion import	2	0.843882	0.0767585	PKD2, HOMER1	223	6	16792	25.1001	1	0.762973	73.2499
GOTERM_BP_DIRECT	GO:0032914~positive regulation of transforming growth factor beta1 production	2	0.843882	0.0767585	LUM, THBS1	223	6	16792	25.1001	1	0.762973	73.2499
GOTERM_BP_DIRECT	GO:0015867~ATP transport	2	0.843882	0.0767585	SLC25A24, GJA1	223	6	16792	25.1001	1	0.762973	73.2499
GOTERM_BP_DIRECT	GO:0042985~negative regulation of amyloid precursor protein biosynthetic process	2	0.843882	0.0767585	BACE2, ITM2A	223	6	16792	25.1001	1	0.762973	73.2499
GOTERM_BP_DIRECT	GO:0001957~intramembranous ossification	2	0.843882	0.0767585	CTSK, COL1A1	223	6	16792	25.1001	1	0.762973	73.2499
GOTERM_BP_DIRECT	GO:0016098~monoterpenoid metabolic process	2	0.843882	0.0767585	CYP2C19, CYP1A2	223	6	16792	25.1001	1	0.762973	73.2499
GOTERM_BP_DIRECT	GO:0032964~collagen biosynthetic process	2	0.843882	0.0767585	COL1A1, COL5A1	223	6	16792	25.1001	1	0.762973	73.2499
GOTERM_BP_DIRECT	GO:0034976~response to endoplasmic reticulum stress	4	1.68776	0.0771072	SRPX, CXCL8, THBS1, FAM129A	223	75	16792	4.01602	1	0.760286	73.4162
GOTERM_MF_DIRECT	GO:0008146~sulfotransferase activity	3	1.26582	0.0785107	CHST9, DSEL, CHST4	213	37	16881	6.42596	1	0.668864	67.9251
GOTERM_BP_DIRECT	GO:0006805~xenobiotic metabolic process	4	1.68776	0.0844689	CYP3A7, CYP2C19, FMO2, CYP1A2	223	78	16792	3.86156	1	0.788065	76.7089
GOTERM_MF_DIRECT	GO:0008519~ammonium transmembrane transporter activity	2	0.843882	0.0846804	SLC12A2, AQP1	213	7	16881	22.6439	1	0.685309	70.786
GOTERM_BP_DIRECT	GO:0072112~glomerular visceral epithelial cell differentiation	2	0.843882	0.0889687	PROM1, CD24	223	7	16792	21.5144	1	0.801728	78.5286
GOTERM_BP_DIRECT	GO:0060740~prostate gland epithelium morphogenesis	2	0.843882	0.0889687	TNC, ID4	223	7	16792	21.5144	1	0.801728	78.5286
GOTERM_BP_DIRECT	GO:0007165~signal transduction	22	9.2827	0.0892352	S100A6, PLCXD3, CAP2, GABRB3, GULP1, LRRC1, COL15A1, CXCL8, GJA1, GEM, CXCL6, SOX9, SIGIRR, RASSF3, SMOC2, WISP1, CCL20, NTS, ANK3, ANTXR1, PRKAA2, DTNA	223	1161	16792	1.42688	1	0.798837	78.6321
GOTERM_BP_DIRECT	GO:0001942~hair follicle development	3	1.26582	0.0897333	PDGFA, CD109, SOX9	223	38	16792	5.94477	1	0.796852	78.8242
GOTERM_BP_DIRECT	GO:0034446~substrate adhesion-dependent cell spreading	3	1.26582	0.0897333	ANTXR1, LAMB1, FZD7	223	38	16792	5.94477	1	0.796852	78.8242
GOTERM_BP_DIRECT	GO:0060291~long-term synaptic potentiation	3	1.26582	0.0897333	SERPINE2, NTRK2, SNAP25	223	38	16792	5.94477	1	0.796852	78.8242
GOTERM_BP_DIRECT	GO:0006810~transport	9	3.79747	0.091481	FXYD2, CHIC1, PTGDS, GABRB3, SLC12A2, AQP4, GJA1, FABP4, CFTR	223	348	16792	1.94743	1	0.799566	79.4856
GOTERM_BP_DIRECT	GO:0006813~potassium ion transport	4	1.68776	0.0947304	KCNJ16, SLC12A2, KCNN2, AQP1	223	82	16792	3.67319	1	0.807548	80.664
GOTERM_CC_DIRECT	GO:0043231~intracellular membrane-bounded organelle	12	5.06329	0.0966058	PROM1, COL4A3, FXYD2, COL4A2, CYP2C19, DTL, CTGF, PODXL, VCAN, CYP1A2, GPRC5B, PMEPA1	231	558	18224	1.6966	1	0.491087	73.1924
GOTERM_MF_DIRECT	GO:0008307~structural constituent of muscle	3	1.26582	0.097514	NEXN, TPM2, NEBL	213	42	16881	5.66097	1	0.726764	75.9946
KEGG_PATHWAY	hsa05205:Proteoglycans in cancer	7	2.95359	0.0988808	GPC3, ANK3, LUM, DCN, HGF, THBS1, FZD7	111	200	6910	2.17883	1	0.745778	71.9583
GOTERM_BP_DIRECT	GO:0042127~regulation of cell proliferation	6	2.53165	0.0992119	FXYD2, TNC, PKD2, JAG1, CXCL6, SOX9	223	185	16792	2.44218	1	0.81917	82.1852

## Sheet: GSE84044
Category	Term	Count	%	PValue	Genes	List Total	Pop Hits	Pop Total	Fold Enrichment	Bonferroni	Benjamini	FDR
GOTERM_BP_DIRECT	GO:0006955~immune response	87	6.4877	1.15704e-19	IGLV1-44, CD8A, IGKV1-17, IL18, SUSD2, TLR1, IL15, HLA-DMB, CXCL11, HLA-DMA, CXCL10, CD96, IL1RAP, SEMA3C, FAS, C5AR1, PTGER4, GZMA, CHST4, CTSS, GEM, TRBC1, HLA-DQA1, HLA-F, IGSF6, SERPINB9, LILRB2, CD86, TNFSF13B, CCR5, CST7, CCR2, CTSC, HLA-DPA1, SEMA4D, GBP2, HLA-DRA, LCP2, HLA-DQB1, CXCL1, C7, TNFRSF21, CCL3, CCL2, HLA-DRB1, ENPP2, CXCL2, CXCL9, GPR65, CCL8, CXCL8, C1R, IL32, OAS2, CXCL6, CC…	1191	421	16792	2.91359	5.02502e-16	5.02502e-16	2.16925e-16
GOTERM_CC_DIRECT	GO:0070062~extracellular exosome	305	22.7442	1.30504e-17	SCPEP1, S100A4, LDHB, ADCY1, S100A6, RARRES1, ATP1B3, LTBP2, PTGS1, CD53, EDIL3, IGHM, AQP1, UXS1, BBOX1, CD48, CD47, HMCN1, CD44, LCAT, COL12A1, RAB25, CFI, FAS, IGLL5, ADAM9, SH3GL3, F11, CRYAB, CDHR2, CDHR5, PTPRO, THY1, PRELP, KRT19, KRT18, TACSTD2, ST14, PLA2G2A, RPS11, HLA-DRA, RBP5, RBP4, ACADSB, HLA-DRB1, MME, ACP5, TAGLN2, CD74, EPHB1, PFN2, PROCR, KLKB1, FGL2, LAMB1, IGKC, SPP1, CNKSR2,…	1258	2811	18224	1.57182	7.41262e-15	7.41262e-15	1.91298e-14
GOTERM_CC_DIRECT	GO:0005615~extracellular space	170	12.6771	5.63909e-15	S100A4, CTHRC1, UTS2, LTBP2, PDGFA, IL18, MMP7, IL15, DLK1, CXCL11, IGHM, MMP2, TGFB1, CXCL10, TGFB2, PTGIS, DMXL2, SERPINE2, PAPPA, CTGF, LCAT, PPP1R1A, APOA5, MS4A1, CPA3, COL12A1, CFI, PDGFD, ADAM9, SPON1, F11, CECR1, PRELP, LILRB2, THBD, CPE, CST7, TACSTD2, ST14, COL1A2, PLA2G2A, WFDC1, STC1, COL1A1, C3P1, TWSG1, RBP4, HMGB2, CCL3, CCL2, ENPP2, CCL8, IL32, GREM1, CCL5, CCL4, ITGAM, ADA, TIMP1…	1258	1347	18224	1.82829	3.21609e-12	1.60805e-12	8.30447e-12
GOTERM_BP_DIRECT	GO:0007155~cell adhesion	81	6.04027	3.83149e-14	ITGB3BP, IGFBP7, FERMT1, EDIL3, PRKX, CD47, CD96, WISP1, SRPX, CD44, ROBO1, CTGF, CLEC4A, COL12A1, LOXL2, SPON1, CYR61, ADAM9, IGFALS, ACKR3, CDHR5, CHST4, SSPN, CTNNA3, THY1, SIRPG, LAMC3, VCAN, SEMA4D, COL1A1, MFAP4, PLXNC1, CCL2, GNE, TNC, NEDD9, KITLG, IL32, CLDN10, CD72, CCL4, ITGAM, CDH6, ITGBL1, ITGB8, FAT1, ITGAV, COL6A3, CD2, CD24, ENTPD1, GPNMB, THBS1, LAMB1, THBS2, DPT, SPP1, COL4A3, H…	1191	459	16792	2.48807	1.66349e-10	8.31744e-11	7.18092e-11
GOTERM_CC_DIRECT	GO:0005576~extracellular region	189	14.094	1.45858e-13	UTS2, CNDP1, IGLV1-44, PDGFA, IL18, MMP7, IL15, JAG1, CXCL11, MMP2, TGFB1, CXCL10, TGFB2, OLFML1, LPA, SERPINE2, ISG15, PAPPA, CTGF, LCAT, APOF, APOA5, CPA3, COL12A1, CFI, PDGFD, FAM150B, F11, CECR1, VASH2, PRELP, CLEC4M, PCOLCE2, CCDC3, LAMC3, COL1A2, PLA2G2A, COL1A1, MFAP4, ADAMTS2, GBP1, FGFR2, ENPP5, RBP4, EMCN, CCL3, CCL2, LPAL2, IFI30, CCL5, CCL4, EPHB1, ITGBL1, TIMP1, PROCR, BCHE, KLKB1, C…	1258	1610	18224	1.70059	8.28617e-11	2.76206e-11	2.1384e-10
GOTERM_BP_DIRECT	GO:0030198~extracellular matrix organization	46	3.43028	1.19059e-12	ELF3, PDGFA, LUM, TNC, NPNT, COL3A1, DCN, SOX9, ITGAM, CD47, SMOC2, CD44, CRISPLD2, ITGB8, HPSE, ITGAV, COL6A3, LAMB1, THBS1, LOXL1, SPP1, CYR61, COL4A4, COL4A3, COL4A2, COL4A1, FBN1, CCDC80, SPINT1, ITGA2, ITGA4, SPARC, COL5A2, COL5A1, COL4A5, LAMA2, VWF, FBLN1, COL14A1, LAMA3, ITGA6, LAMC3, FBLN5, COL1A2, VCAN, COL1A1	1191	196	16792	3.30897	5.17079e-09	1.7236e-09	2.23218e-09
GOTERM_CC_DIRECT	GO:0031012~extracellular matrix	55	4.10142	3.82955e-11	ASPN, AEBP1, LTBP2, IGFBP7, MMP7, EDIL3, MMP2, TGFB1, TGFB2, HMCN1, SERPINE2, COL12A1, LOXL2, LOXL1, TFPI2, CYR61, SPON1, MMP19, PFKP, MGP, PRELP, COL1A2, VCAN, COL1A1, RPS11, MFAP4, FGFR2, FRAS1, LUM, TNC, VIM, COL3A1, DCN, COL6A3, ADAMTS12, LAMB1, THBS1, THBS2, DPT, COL4A2, COL4A1, LGALS3, FBN1, EFEMP1, LMCD1, COL15A1, EMILIN2, COL5A2, COL5A1, ANXA2, LAMA2, VWF, FBLN1, COL14A1, FBLN5	1258	296	18224	2.69175	2.17518e-08	5.43796e-09	5.61352e-08
GOTERM_MF_DIRECT	GO:0008009~chemokine activity	20	1.49142	2.11539e-10	CXCL1, CCL3, CCL2, CXCL2, CXCL9, CXCL8, CCL19, CCL8, CXCL6, CXCL11, CCL5, CCL4, CCL18, CXCL10, CCL14, CCL20, CCL21, CXCL13, CKLF, XCL1	1172	49	16881	5.87901	2.65481e-07	2.65481e-07	3.43895e-07
GOTERM_CC_DIRECT	GO:0005578~proteinaceous extracellular matrix	50	3.72856	2.84986e-10	ASPN, CTHRC1, LTBP2, NPNT, MMP7, MMP2, TGFB1, GPC4, GPC3, WISP1, HPSE, CTGF, TFPI2, CYR61, SPON1, MMP19, MGP, SLIT2, PRELP, LAMC3, COL1A2, VCAN, ADAMTS2, LUM, TIMP1, SMOC2, CCL21, CRISPLD2, SMOC1, COL6A3, ADAMTS12, DPT, COL4A4, COL4A3, FLRT2, HAPLN4, FBN1, EFEMP1, CHI3L1, COL15A1, PAPLN, SPARC, EMILIN2, COL5A2, COL5A1, COL4A5, VWF, FBLN1, COL14A1, FBLN5	1258	268	18224	2.7027	1.61872e-07	3.23744e-08	4.17744e-07
GOTERM_CC_DIRECT	GO:0005604~basement membrane	25	1.86428	3.09954e-10	FRAS1, COL4A3, COL4A1, NPNT, TNC, EFEMP2, FBN1, CCDC80, SPARC, COL5A1, ANXA2, TIMP1, ANXA2P2, LAMA2, SMOC2, FBLN1, LAMA3, HMCN1, ITGA6, LAMC3, SMOC1, LOXL2, LAMB1, THBS2, LOXL1	1258	79	18224	4.58433	1.76054e-07	2.93423e-08	4.54344e-07
GOTERM_MF_DIRECT	GO:0005201~extracellular matrix structural constituent	23	1.71514	3.49749e-10	COL4A4, COL4A3, COL4A2, HAPLN4, COL4A1, LUM, EFEMP2, COL3A1, FBN1, COL15A1, CHI3L1, MGP, COL5A2, COL5A1, PRELP, COL4A5, FBLN1, COL14A1, COL1A2, VCAN, COL1A1, LAMB1, TFPI2	1172	67	16881	4.94451	4.38935e-07	2.19467e-07	5.68581e-07
KEGG_PATHWAY	hsa04512:ECM-receptor interaction	28	2.08799	5.56125e-10	TNC, COL3A1, HMMR, CD47, CD44, ITGB8, ITGAV, COL6A3, THBS1, LAMB1, THBS2, SPP1, COL4A4, COL4A3, COL4A2, COL4A1, ITGA2, ITGA4, COL5A2, COL5A1, COL4A5, LAMA2, VWF, LAMA3, ITGA6, LAMC3, COL1A2, COL1A1	568	87	6910	3.91533	1.5349e-07	1.5349e-07	7.33695e-07
GOTERM_CC_DIRECT	GO:0009986~cell surface	78	5.81655	9.70179e-10	MICB, PDGFA, MMP7, CD53, IL15, LPAR1, IGHM, HLA-DMA, TGFB1, EPCAM, SRPX, CD44, CXCR4, ROBO1, ANK3, FAS, ADAM9, C5AR1, CRYAB, CEP41, ACKR3, CFTR, IL6R, SLIT2, HLA-F, LILRB2, FOLH1, CD86, THBD, CCR5, BACE2, VAMP5, SORT1, HLA-DPA1, PTGFRN, HLA-DRA, FGFR2, TF, HLA-DRB1, GPRC5B, GREM1, CD74, ADA, ITGAM, HMMR, PROCR, HSPA2, ITGB8, ITGAV, CD2, FUT4, HLA-DPB1, CD24, THBS1, FCER1A, HAVCR2, PTPRC, CAPN5, A…	1258	542	18224	2.08477	5.51062e-07	7.87231e-08	1.42213e-06
GOTERM_BP_DIRECT	GO:0070374~positive regulation of ERK1 and ERK2 cascade	38	2.83371	1.42655e-09	FGFR2, CCL3, CCL2, PDGFA, NPNT, F2RL1, CCL8, PTPN22, CCL5, CCL4, CD74, TGFB1, CD44, CCL20, CTGF, CCL21, RASGRP1, PYCARD, PDGFD, FAM150B, ARHGAP8, GPNMB, HAVCR2, C5AR1, CHI3L1, CCL19, ACKR3, GPER1, GAS6, CCL18, CCL14, JUN, PDGFRA, PLA2G2A, ADRA1A, HTR2B, XCL1, PLA2G5	1191	175	16792	3.06151	6.1955e-06	1.54888e-06	2.67455e-06
GOTERM_BP_DIRECT	GO:0070098~chemokine-mediated signaling pathway	23	1.71514	1.82782e-09	CXCL1, CCL3, CCL2, CXCL2, CXCL9, CXCL8, CCL19, CCL8, ACKR3, CXCL6, CXCL11, CCL5, CCL4, CCL18, CXCL10, CCL14, CCR5, CCL20, CXCR4, CCL21, CXCL13, CCR2, XCL1	1191	71	16792	4.56731	7.93819e-06	1.58764e-06	3.42686e-06
KEGG_PATHWAY	hsa05323:Rheumatoid arthritis	27	2.01342	3.79728e-09	HLA-DQB1, CCL3, CCL2, HLA-DRB1, IL18, ACP5, CXCL8, IL15, CXCL6, HLA-DMB, CCL5, HLA-DMA, TGFB1, TGFB2, TNFRSF11A, CCL20, HLA-DPB1, HLA-DOA, HLA-DOB, HLA-DQA1, ATP6V1C1, CD86, CTSK, TNFSF13B, JUN, HLA-DPA1, HLA-DRA	568	88	6910	3.73259	1.04805e-06	5.24024e-07	5.00975e-06
GOTERM_CC_DIRECT	GO:0009897~external side of plasma membrane	41	3.05742	5.55026e-09	IGHG1, EMCN, CD8A, HLA-DRB1, VTCN1, TFR2, CXCL9, AQP4, IL7R, IGHM, CD74, ADA, CXCL10, CD48, GPC4, TNFRSF11A, CD69, ITGAV, CD2, MS4A1, HEG1, FAS, IGKC, THBS1, IGLL5, CD27, FCER1A, PTPRC, SELL, ITGA2, ANXA5, MCAM, SPA17, THY1, P2RY12, CD86, ITGA6, CCR5, KLRC4-KLRK1, ANTXR1, IGLC1	1258	213	18224	2.78848	3.15254e-06	3.94069e-07	8.13582e-06
GOTERM_BP_DIRECT	GO:0002250~adaptive immune response	33	2.46085	1.02784e-08	TNFRSF21, VTCN1, IGHM, TNFRSF11A, TAP2, FCGR1B, TAP1, CLEC4A, PAG1, SYK, HAVCR2, PIK3CG, ITK, CRTAM, THEMIS, ANXA1, EOMES, TNFRSF17, SLAMF7, CTSS, FCAMR, TRAT1, CD1E, CLEC4M, DCLRE1C, CD84, LILRB2, CD86, LAMP3, KLRC4-KLRK1, LIME1, JAK3, PRDM1	1191	148	16792	3.14371	4.4638e-05	7.43981e-06	1.92702e-05
KEGG_PATHWAY	hsa04110:Cell cycle	32	2.38628	1.06279e-08	E2F3, DBF4, TTK, PTTG1, TGFB1, TGFB2, CCNE2, CDKN2C, BUB1, CCNA2, MYC, CDC7, CDK1, CDC6, CDC20, RB1, MCM2, ATR, MCM3, MCM4, MCM5, MCM6, CDKN1C, CCNB1, CCND1, CDKN1A, CCNB2, MAD2L1, CCND2, PCNA, MDM2, BUB1B	568	124	6910	3.13948	2.9333e-06	9.77768e-07	1.40214e-05
GOTERM_BP_DIRECT	GO:0060326~cell chemotaxis	21	1.566	1.13927e-08	CXCL1, CCL3, HMGB2, CCL2, C5AR1, CXCL2, CXCL9, LEF1, CCL19, CCL8, FPR3, CXCL6, LPAR1, HGF, CCL5, EPHB1, CXCL10, CCL14, CCL20, CCL21, PDGFRA	1191	65	16792	4.55509	4.94772e-05	7.06832e-06	2.13594e-05
GOTERM_MF_DIRECT	GO:0008201~heparin binding	33	2.46085	4.44126e-08	FGFR2, CCL2, LTBP2, LXN, MMP7, CCL8, CXCL6, CXCL11, CXCL10, SMOC2, WISP1, LPA, SERPINE2, CRISPLD2, CTGF, APOA5, GPNMB, THBS1, THBS2, CYR61, F11, SELL, FBN1, CECR1, CCDC80, COL5A1, SLIT2, PRELP, PCOLCE2, CXCL13, NAV2, LIPC, PLA2G5	1172	160	16881	2.97074	5.57363e-05	1.85791e-05	7.22008e-05
GOTERM_CC_DIRECT	GO:0005887~integral component of plasma membrane	151	11.2603	4.86437e-08	ADCY1, TUSC3, SLC13A5, GABRB3, F2RL1, TLR1, AQP4, TSPAN8, CD52, CD53, IL15, JAG1, LPAR1, AQP1, SLC7A6, CD48, CD47, CD44, SLC2A3, ROBO1, KCNK5, CLEC4A, MS4A1, FAS, PAG1, FLVCR1, CRTAM, C5AR1, CD3G, SSPN, PTPRO, HLA-DQA1, TRAT1, THY1, CLEC4M, IGSF6, LILRB2, VSIG2, THBD, CCR5, TACSTD2, ST14, CCR2, VAMP5, PDGFRA, HLA-DPA1, SLC38A1, HLA-DRA, FGFR2, SLC38A4, CAV2, PLXNC1, HLA-DRB1, CYSLTR1, ENPP2, SLC3…	1258	1415	18224	1.54591	2.76293e-05	3.06995e-06	7.13041e-05
GOTERM_BP_DIRECT	GO:0006954~inflammatory response	58	4.32513	4.96319e-08	ELF3, LXN, IL18, F2RL1, TLR1, PTGS1, IL15, CXCL11, TLR8, TGFB1, CXCL10, TNFRSF11A, CXCR4, IL1RAP, FAS, SYK, PIK3CG, NFKBIZ, C5AR1, GBP5, LY96, LYZ, CHST4, IFI16, GPER1, CCR5, CCR2, CXCL1, TNFRSF21, CCL3, CCL2, CXCL2, CXCL9, CXCL8, CCL8, FPR3, CXCL6, CCL5, CCL4, CCL20, CCL21, PYCARD, THBS1, CD27, SPP1, LY75, HAVCR2, CHI3L1, EPHX2, ANXA1, CCL19, AIM2, CCL18, APOL3, CCL14, CXCL13, AOX1, CLEC7A	1191	379	16792	2.15764	0.000215528	2.69436e-05	9.30515e-05
KEGG_PATHWAY	hsa04672:Intestinal immune network for IgA production	18	1.34228	7.28436e-08	HLA-DQB1, HLA-DRB1, TNFRSF17, ITGA4, PIGR, IL15, HLA-DMB, HLA-DMA, HLA-DQA1, TGFB1, CD86, TNFSF13B, CXCR4, HLA-DPA1, HLA-DPB1, HLA-DOA, HLA-DOB, HLA-DRA	568	47	6910	4.65912	2.01046e-05	5.0262e-06	9.61026e-05
GOTERM_BP_DIRECT	GO:0002548~monocyte chemotaxis	16	1.19314	8.34256e-08	CCL3, CCL2, LGALS3, ANXA1, CCL19, CCL8, IL6R, CCL5, PTPRO, CCL4, CCL18, TNFRSF11A, CCL14, CCL20, CCL21, XCL1	1191	42	16792	5.37108	0.000362252	4.02567e-05	0.000156409
KEGG_PATHWAY	hsa05150:Staphylococcus aureus infection	19	1.41685	1.2802e-07	HLA-DQB1, C5AR1, HLA-DRB1, C1R, FPR3, C1S, HLA-DMB, HLA-DMA, ITGAM, PLG, HLA-DQA1, FCGR1A, HLA-DPA1, FCGR2A, CFI, HLA-DPB1, HLA-DOA, HLA-DOB, HLA-DRA	568	54	6910	4.28045	3.5333e-05	7.0667e-06	0.000168897
GOTERM_BP_DIRECT	GO:0030574~collagen catabolic process	19	1.41685	2.81409e-07	COL4A4, COL4A3, COL4A2, COL4A1, COL3A1, MMP19, COL15A1, MMP7, CTSS, COL5A2, MMP2, COL5A1, COL4A5, CTSK, COL6A3, COL1A2, COL12A1, COL1A1, ADAMTS2	1191	64	16792	4.18566	0.00122141	0.000122208	0.000527593
GOTERM_BP_DIRECT	GO:0007165~signal transduction	128	9.54512	4.44112e-07	ITGB3BP, S100A6, GABRB3, TLR1, IQGAP3, CD53, IL15, CXCL11, CXCL10, CD48, ANK2, ANK3, PPP1R1A, FAS, MX1, PAG1, SH3GL3, C5AR1, LRRC1, TNFRSF17, GEM, DEPDC1, STK4, TRAT1, RND2, LILRB2, THBD, OPHN1, STMN1, PLCXD3, CCL2, CCL8, NEDD9, ELK3, CD72, GREM1, SOX9, CCL4, CD74, TAGAP, CD69, ADRA2A, NDRG2, HLA-DOA, HLA-DOB, TRAF5, CDC42EP3, GABRP, ITK, GABRE, S100A11, GAS6, P2RX5, APOL3, NR1I3, LYVE1, NR1I2, R…	1191	1161	16792	1.55442	0.00192692	0.000175328	0.000832632
GOTERM_BP_DIRECT	GO:0030593~neutrophil chemotaxis	19	1.41685	4.67165e-07	PIK3CG, CCL3, CCL2, VAV3, C5AR1, LGALS3, SLC37A4, CXCL8, NCKAP1L, CCL8, CCL5, CCL4, CCL18, TGFB2, CCL14, CCL20, CKLF, XCL1, SYK	1191	66	16792	4.05883	0.00202684	0.00016906	0.000875852
GOTERM_BP_DIRECT	GO:0071356~cellular response to tumor necrosis factor	25	1.86428	5.87131e-07	TNFRSF21, CCL3, CCL2, NPNT, YBX3, CHI3L1, CXCL8, CCL8, CCL19, GPER1, CCL5, CCL4, CCL18, PCK1, IL18BP, CCL14, CCL20, CCL21, CD58, PYCARD, FABP4, COL1A1, ADAMTS12, XCL1, THBS1	1191	110	16792	3.20434	0.00254666	0.000196128	0.00110077
GOTERM_BP_DIRECT	GO:0048146~positive regulation of fibroblast proliferation	17	1.26771	5.89585e-07	CDC6, S100A6, UTS2, PDGFA, AQP1, CD74, GAS6, TGFB1, ANXA2, CCNB1, FBLN1, CDKN1A, JUN, PDGFRA, PDGFD, MYC, CCNA2	1191	54	16792	4.4386	0.00255729	0.000182881	0.00110537
GOTERM_BP_DIRECT	GO:0002504~antigen processing and presentation of peptide or polysaccharide antigen via MHC class II	10	0.745712	6.32065e-07	HLA-DQB1, HLA-DRB1, HLA-DPA1, HLA-DPB1, HLA-DMB, HLA-DOA, HLA-DMA, HLA-DOB, HLA-DQA1, HLA-DRA	1191	17	16792	8.29357	0.0027413	0.000182987	0.00118501
GOTERM_CC_DIRECT	GO:0042613~MHC class II protein complex	11	0.820283	7.06578e-07	HLA-DQB1, HLA-DRB1, HLA-DPA1, HLA-DPB1, HLA-DMB, HLA-DOA, HLA-DMA, HLA-DOB, CD74, HLA-DQA1, HLA-DRA	1258	22	18224	7.24324	0.000401256	4.01328e-05	0.00103573
KEGG_PATHWAY	hsa05222:Small cell lung cancer	23	1.71514	7.88901e-07	COL4A4, PIK3CG, COL4A3, COL4A2, E2F3, COL4A1, ITGA2, RB1, BIRC3, COL4A5, LAMA2, CCNE2, CCND1, LAMA3, ITGA6, LAMC3, ITGAV, BCL2, CKS2, LAMB1, PIK3R3, MYC, TRAF5	568	85	6910	3.29184	0.000217713	3.62888e-05	0.00104079
KEGG_PATHWAY	hsa04151:PI3K-Akt signaling pathway	56	4.17599	8.78458e-07	OSMR, PDGFA, LPAR1, CCNE2, PDGFD, MYC, SYK, PPP2R1B, PIK3CG, SGK1, IL6R, CCND1, G6PC, LAMC3, CCND2, COL1A2, PDGFRA, MDM2, GNB4, COL1A1, FGFR2, TNC, COL3A1, KITLG, IL7R, ITGB8, BCL2, ITGAV, COL6A3, PRKAA2, THBS1, LAMB1, PIK3R3, THBS2, SPP1, COL4A4, COL4A3, COL4A2, COL4A1, IL7, ITGA2, CREB5, ITGA4, HGF, COL5A2, COL5A1, COL4A5, PCK1, LAMA2, VWF, CDKN1A, LAMA3, ITGA6, JAK1, RHEB, JAK3	568	345	6910	1.97469	0.000242425	3.46357e-05	0.00115894
GOTERM_BP_DIRECT	GO:0008284~positive regulation of cell proliferation	63	4.69799	1.09995e-06	CLDN7, E2F3, PRC1, OSMR, PDGFA, NAP1L1, TTK, IL15, TGFB1, TGFB2, CXCL10, EPCAM, CD47, EDNRB, TNFRSF11A, CTGF, RAB25, YAP1, PDGFD, MYC, KIF14, CDC7, AR, MLXIPL, LEF1, GPER1, IL6R, CD86, SIRPG, TNFSF13B, CCND2, PDGFRA, MDM2, EIF5A2, FGFR2, PKHD1, TNC, FOXM1, SOX4, GREM1, SOX9, TSPYL5, TIMP1, BCL2, ITGAV, ADRA2A, THBS1, RUNX2, ACER3, IL7, MZB1, CDC20, BIRC5, HGF, WWTR1, CLEC11A, CCL14, AVPR1A, ID4, …	1191	466	16792	1.9061	0.00476569	0.000298523	0.0020622
GOTERM_BP_DIRECT	GO:0050900~leukocyte migration	26	1.93885	1.19284e-06	ATP1B3, F2RL1, FPR3, ITGAM, SLC7A6, CD74, CD48, CD47, PROCR, CD44, ITGAV, CD2, MSN, C5AR1, SELL, PODXL, ITGA4, GAS6, CD84, SIRPG, THBD, ITGA6, CD58, LCK, COL1A2, COL1A1	1191	122	16792	3.00472	0.0051671	0.000304688	0.00223634
KEGG_PATHWAY	hsa04510:Focal adhesion	39	2.90828	1.35686e-06	CAV2, PDGFA, TNC, COL3A1, ITGB8, BCL2, ITGAV, COL6A3, PDGFD, PIK3R3, LAMB1, THBS1, THBS2, SPP1, PIK3CG, COL4A4, COL4A3, COL4A2, VAV3, COL4A1, ITGA2, ITGA4, HGF, CAPN2, BIRC3, COL5A2, COL5A1, COL4A5, LAMA2, VWF, CCND1, LAMA3, ITGA6, CCND2, LAMC3, JUN, COL1A2, PDGFRA, COL1A1	568	206	6910	2.30318	0.000374423	4.68106e-05	0.00179009
GOTERM_BP_DIRECT	GO:0032496~response to lipopolysaccharide	31	2.31171	1.36123e-06	CXCL1, TNFRSF21, HMGB2, CXCL2, CXCL9, ACP5, PTPN22, DCN, CXCL6, CXCL11, CXCL10, CD96, IRAK3, TNFRSF11A, FMO1, TRIM6, CSF2RB, FAS, CASP1, LOXL1, CD27, C5AR1, PTGER4, LY96, SPARC, CYP1A2, PCK1, IL18BP, THBD, CXCL13, JUN	1191	164	16792	2.66507	0.0058944	0.000328382	0.00255205
GOTERM_CC_DIRECT	GO:0031090~organelle membrane	21	1.566	1.41204e-06	CYP3A4, CYP3A5, FLRT2, CYP3A7, CYP2C19, CYP2C9, CYP2D6, PTGS1, CYP26A1, DHRS9, CYP1A2, CYP3A43, CYP2A13, FMO5, CYP4A11, FMO1, FMO2, CYP7A1, CYP2A6, CYP2A7, SRD5A2	1258	87	18224	3.49674	0.000801718	7.291e-05	0.00206981
KEGG_PATHWAY	hsa05166:HTLV-I infection	45	3.3557	1.49304e-06	HLA-DQB1, E2F3, ADCY1, ADCY7, HLA-DRB1, PDGFA, IL15, PTTG1, HLA-DMB, HLA-DMA, TGFB1, TGFB2, CDKN2C, HLA-DPB1, HLA-DOA, PIK3R3, HLA-DOB, MYC, PIK3CG, CD3G, EGR2, CD3D, FZD1, CDC20, RB1, ATR, FZD2, HLA-DQA1, FZD7, FZD6, HLA-F, CCND1, CDKN1A, MAD2L1, CCND2, JUN, BAX, LCK, PCNA, PDGFRA, JAK1, BUB1B, HLA-DPA1, JAK3, HLA-DRA	568	256	6910	2.13847	0.000411994	4.57855e-05	0.00196975
KEGG_PATHWAY	hsa04974:Protein digestion and absorption	23	1.71514	1.49534e-06	COL4A4, COL4A3, FXYD2, COL4A2, SLC8A1, COL4A1, ATP1B3, SLC16A10, COL3A1, COL15A1, MME, SLC3A1, COL5A2, COL5A1, COL4A5, COL14A1, COL6A3, KCNK5, ACE2, COL1A2, COL12A1, CPA3, COL1A1	568	88	6910	3.17962	0.00041263	4.12706e-05	0.00197279
GOTERM_BP_DIRECT	GO:0006805~xenobiotic metabolic process	20	1.49142	1.50076e-06	CYP3A4, ACSM2B, CYP3A5, CYP3A7, NCEH1, CYP2C19, CYP2C9, PTGS1, CYP2D6, EPHX2, CYP26A1, RORC, CYP1A2, CYP2A13, GLYAT, NR1I2, FMO1, FMO2, NQO1, GSTP1	1191	78	16792	3.61515	0.00649661	0.000342984	0.00281364
GOTERM_BP_DIRECT	GO:0060333~interferon-gamma-mediated signaling pathway	19	1.41685	1.50972e-06	HLA-DQB1, HLA-DRB1, IFI30, OAS2, STAT1, MID1, TRIM22, HLA-DQA1, HLA-F, CD44, FCGR1A, FCGR1B, IRF1, JAK1, HLA-DPA1, HLA-DPB1, GBP2, GBP1, HLA-DRA	1191	71	16792	3.77299	0.00653528	0.000327783	0.00283044
GOTERM_BP_DIRECT	GO:0071347~cellular response to interleukin-1	19	1.41685	1.50972e-06	CCL3, CCL2, CHI3L1, CXCL8, CCL19, CCL8, SOX9, CCL5, CCL4, CCL18, PCK1, PTGIS, CCL14, CCL20, CCL21, PYCARD, ADAMTS12, XCL1, MYC	1191	71	16792	3.77299	0.00653528	0.000327783	0.00283044
GOTERM_BP_DIRECT	GO:0030199~collagen fibril organization	14	1.044	1.51909e-06	LUM, COL3A1, GREM1, COL5A2, COL5A1, TGFB2, ANXA2, COL14A1, COL1A2, COL12A1, COL1A1, LOXL2, ADAMTS2, DPT	1191	39	16792	5.06121	0.0065757	0.000314113	0.002848
GOTERM_BP_DIRECT	GO:0000082~G1/S transition of mitotic cell cycle	23	1.71514	2.10386e-06	CDC7, BCAT1, CDC6, CDK1, DBF4, IQGAP3, RB1, MCM2, CDKN3, MCM10, MCM3, MCM4, MCM5, MCM6, CCNE2, TYMS, CCND1, CDKN1A, PLK2, CDKN2C, RRM2, PCNA, ID4	1191	102	16792	3.1792	0.00909548	0.000415236	0.00394432
GOTERM_MF_DIRECT	GO:0032395~MHC class II receptor activity	9	0.671141	2.16963e-06	HLA-DQB1, HLA-DRB1, HLA-DPA1, HLA-DPB1, HLA-DOA, HLA-DMA, HLA-DOB, HLA-DQA1, HLA-DRA	1172	15	16881	8.64215	0.00271918	0.00068049	0.00352707
GOTERM_BP_DIRECT	GO:0043066~negative regulation of apoptotic process	61	4.54884	2.19464e-06	STIL, CLDN7, IER3, FIGNL1, YBX3, AURKA, AQP1, EPCAM, EDNRB, CD44, FAS, NQO1, MYC, CYR61, KIF14, CDK1, SOCS3, CRYAB, BCL2A1, LEF1, SERPINB9, DHRS2, AMIGO2, MAD2L1, KRT18, CCND2, TNFAIP8, MDM2, SEMA4D, GSTP1, PKHD1, FHL2, ASNS, GREM1, SOX9, CD74, TIMP1, BCL2, BCL11B, FAIM, PRKAA2, THBS1, CD27, IL7, ANXA1, NCKAP1L, BIRC5, ANXA5, BIRC3, ANXA4, CAPN3, GAS6, IFIT3, ATF5, CDKN1A, PLK2, ID1, UCP2, GRK5, …	1191	455	16792	1.89021	0.00948604	0.000414319	0.0041145
KEGG_PATHWAY	hsa05145:Toxoplasmosis	27	2.01342	2.29128e-06	HLA-DQB1, HLA-DRB1, HLA-DMB, HLA-DMA, TGFB1, TGFB2, HSPA2, BCL2, HLA-DPB1, PIK3R3, LAMB1, HLA-DOA, HLA-DOB, PIK3CG, LY96, STAT1, BIRC3, HLA-DQA1, LAMA2, LAMA3, ITGA6, CCR5, LAMC3, JAK1, HLA-DPA1, ALOX5, HLA-DRA	568	118	6910	2.78363	0.000632195	5.74888e-05	0.00302285
KEGG_PATHWAY	hsa05200:Pathways in cancer	60	4.47427	2.6417e-06	ADCY1, E2F3, ADCY7, PDGFA, MITF, LPAR1, MMP2, TGFB1, TGFB2, EDNRA, CCNE2, EDNRB, CXCR4, FAS, MYC, PIK3CG, AR, CTBP2, PTGER4, LEF1, RB1, STK4, CTNNA3, CCND1, LAMC3, JUN, PDGFRA, MDM2, GNB4, FGFR2, CXCL8, KITLG, BCL2, RASGRP1, ITGAV, LAMB1, PIK3R3, TRAF5, COL4A4, COL4A3, COL4A2, COL4A1, MSH2, FZD1, ITGA2, BIRC5, HGF, FZD2, BIRC3, STAT1, FZD7, FZD6, COL4A5, LAMA2, CDKN1A, LAMA3, ITGA6, BAX, CKS2, JA…	568	393	6910	1.85733	0.000728845	6.07573e-05	0.00348514
KEGG_PATHWAY	hsa04514:Cell adhesion molecules (CAMs)	30	2.23714	3.09819e-06	HLA-DQB1, CLDN7, CD8A, HLA-DRB1, VTCN1, CLDN10, CLDN11, HLA-DMB, HLA-DMA, ITGAM, CLDN14, ITGB8, ITGAV, CD2, HLA-DPB1, HLA-DOA, HLA-DOB, PTPRC, SELL, NRXN3, NFASC, ITGA4, HLA-DQA1, HLA-F, CD86, ITGA6, CD58, VCAN, HLA-DPA1, HLA-DRA	568	142	6910	2.57017	0.000854736	6.57749e-05	0.00408736
GOTERM_BP_DIRECT	GO:0006935~chemotaxis	25	1.86428	4.1247e-06	CXCL1, PLP2, CCL3, CCL2, C5AR1, CYSLTR1, ENPP2, CXCL2, CXCL9, CXCL8, NCKAP1L, CCL8, ACKR3, CXCL6, CXCL11, CCL5, CCL18, CXCL10, CCR5, CCL20, CXCR4, CCR2, CMTM7, DEFB1, CYR61	1191	122	16792	2.88916	0.0177541	0.000746122	0.00773284
GOTERM_BP_DIRECT	GO:0042493~response to drug	45	3.3557	4.63228e-06	ADCY1, HMGB2, UTS2, SORD, AQP1, ADA, TGFB1, TGFB2, TYMS, BCHE, BCL2, OXCT1, SEMA3C, SRD5A2, THBS1, MYC, CDK1, SLC8A1, MYO6, VAV3, ANXA1, FZD1, CENPF, NCKAP1L, ITGA2, ABCB1, DPYSL2, ACACB, ATR, STAT1, ABCG2, CCNB1, CCND1, CDKN1A, CD86, JUN, LCK, WFDC1, MDM2, ABCC4, ADRA1A, ABCC1, COL1A1, AACS, HTR2B	1191	304	16792	2.08703	0.019917	0.000804398	0.0086844
GOTERM_MF_DIRECT	GO:0005509~calcium ion binding	83	6.18941	4.70311e-06	ASPN, PDP1, S100A4, S100A6, LTBP2, NPNT, SYT9, EDIL3, JAG1, DLK1, PSPH, EFHD1, HMCN1, GSN, ITIH1, SLC25A24, CDH23, EFCAB11, VIL1, CDHR2, MMP19, MGP, CDHR5, PCDH7, TC2N, LPCAT2, SLIT2, MCTP1, ANXA2P2, THBD, PLA2G2A, VCAN, MELK, PLA2G5, ME1, MYO5A, EPDR1, ENPP2, C1R, C1S, CDH6, SMOC2, ANXA8, GNPTAB, CD69, FAT1, SMOC1, RASGRP1, HEG1, THBS1, THBS2, EHD4, GPD2, SLC8A1, TESC, SVEP1, NIN, RASEF, SWAP70,…	1172	717	16881	1.66736	0.00588503	0.00117979	0.00764549
KEGG_PATHWAY	hsa05332:Graft-versus-host disease	13	0.969426	5.90824e-06	HLA-DQB1, HLA-DRB1, HLA-DMB, HLA-DMA, HLA-DQA1, HLA-F, CD86, HLA-DPA1, HLA-DPB1, FAS, HLA-DOA, HLA-DOB, HLA-DRA	568	33	6910	4.79247	0.00162935	0.00011647	0.00779446
GOTERM_BP_DIRECT	GO:0071346~cellular response to interferon-gamma	16	1.19314	6.79635e-06	CCL3, CCL2, GBP5, AQP4, CCL19, CCL8, CCL5, CCL4, CCL18, CCL14, CCL20, CCL21, CD58, HLA-DPA1, XCL1, MYC	1191	57	16792	3.95764	0.0290853	0.00113461	0.0127412
GOTERM_CC_DIRECT	GO:0005886~plasma membrane	349	26.0254	7.60384e-06	ADCY1, ATP1B3, ADCY7, OSMR, AQP4, SYT9, PVRIG, CD53, MYLIP, LPAR1, IGHM, AQP1, CD48, CD47, CD44, DIRAS3, CTGF, CLEC4G, CLEC4A, FAS, SYK, CDH23, PIK3CG, F11, CRTAM, CD3G, C5AR1, CD3D, CDHR5, TC2N, PTPRO, HLA-DQA1, THY1, LILRB2, KRT19, SIRPG, CCR5, ST14, CCR2, PLA2G2A, PDGFRA, HLA-DPA1, PMP22, BTN3A3, DBN1, HLA-DRA, ENPP5, EMCN, HLA-DRB1, ENPP2, STK17B, MME, IFI30, CD72, CD74, EPHB1, ADA, PROCR, KL…	1258	4121	18224	1.22683	0.00430969	0.000359852	0.0111455
GOTERM_BP_DIRECT	GO:0050729~positive regulation of inflammatory response	18	1.34228	1.01417e-05	CCL3, CCL2, PTGER4, IL18, ITGA2, CCL8, IL15, GPRC5B, CCL5, CCL4, CCL18, CD47, CCL14, CCR2, PLA2G7, PLA2G2A, FABP4, XCL1	1191	73	16792	3.47648	0.0430897	0.00162999	0.0190123
KEGG_PATHWAY	hsa05140:Leishmaniasis	19	1.41685	1.09025e-05	HLA-DQB1, HLA-DRB1, ITGA4, HLA-DMB, STAT1, HLA-DMA, ITGAM, TGFB1, HLA-DQA1, TGFB2, FCGR1A, JUN, JAK1, HLA-DPA1, FCGR2A, HLA-DPB1, HLA-DOA, HLA-DOB, HLA-DRA	568	71	6910	3.25555	0.00300458	0.000200587	0.0143827
GOTERM_BP_DIRECT	GO:0042102~positive regulation of T cell proliferation	16	1.19314	1.34014e-05	HAVCR2, PTPRC, VTCN1, ANXA1, CCL19, NCKAP1L, IL15, HLA-DMB, CCL5, LILRB2, NCK2, TNFSF13B, HLA-DPA1, HLA-DPB1, JAK3, SASH3	1191	60	16792	3.75975	0.0565415	0.00207651	0.0251225
GOTERM_BP_DIRECT	GO:0050870~positive regulation of T cell activation	9	0.671141	1.43022e-05	CD47, SIRPG, CCL2, CCR2, LCK, PYCARD, HLA-DPA1, HLA-DPB1, THY1	1191	18	16792	7.04954	0.060225	0.0021396	0.0268108
GOTERM_MF_DIRECT	GO:0042803~protein homodimerization activity	82	6.11484	1.63811e-05	S100A6, CD8A, PDGFA, E2F8, TTK, APOBEC3G, PSPH, UXS1, TGFB1, TGFB2, TP53I3, SLC51A, BHLHE41, TOP2A, THRSP, AADAT, CRTAM, CTBP2, PRTFDC1, CRYAB, GZMA, BCL2A1, VIL1, MLXIPL, CECR1, PFKM, IL6R, PTPRO, ECT2, STK4, TOX3, SLIT2, MAD2L1, DGAT2, HSPB6, JUN, CCR2, PDGFRA, FGFR2, CAV2, DCK, ASNS, CCL5, MTMR2, TYMS, IRAK3, BCL2, OXCT1, RASGRP1, TAP1, ADRA2A, CD2, PYCARD, INPP5F, MTCL1, MYOM1, TCF4, TESC, IK…	1172	730	16881	1.61794	0.0203486	0.00342054	0.0266271
KEGG_PATHWAY	hsa04940:Type I diabetes mellitus	14	1.044	1.83316e-05	HLA-DQB1, HLA-DRB1, HLA-DMB, HLA-DMA, HLA-DQA1, HLA-F, CD86, CPE, HLA-DPA1, HLA-DPB1, FAS, HLA-DOA, HLA-DOB, HLA-DRA	568	42	6910	4.05516	0.0050468	0.000316174	0.0241822
GOTERM_CC_DIRECT	GO:0005788~endoplasmic reticulum lumen	31	2.31171	2.11068e-05	ARSD, PDGFA, COL3A1, DNAJC10, ARSJ, FMO1, BCHE, EOGT, COL6A3, COL12A1, GPX8, PDGFD, GPX7, THBS1, SPON1, COL4A4, COL4A3, COL4A2, COL4A1, MZB1, COL15A1, COL5A2, COL5A1, GAS6, COL4A5, COL14A1, COL1A2, CTSC, COL1A1, LIPC, RCN2	1258	192	18224	2.33896	0.0119172	0.000921789	0.0309348
GOTERM_MF_DIRECT	GO:0005515~protein binding	678	50.5593	2.26092e-05	PDP1, LDHB, LTBP2, RORC, MYLIP, IGHM, SH3YL1, FLI1, ISG15, DIRAS3, SERPINE2, CTGF, PPP1R1A, FAS, FAM150B, CCNA2, TYMSOS, ZNF101, SYK, CDCA3, CDH23, ADAM9, SH3GL3, PIK3CG, GBP5, CRYAB, CDHR2, DCDC2, VPS41, CDHR5, GEM, PTPRO, TOX3, CTNNA3, THY1, NME5, SIRPG, TAGLN, ASCC3, JUN, ZWINT, RPS11, PMP22, KIF4A, RTP4, DBNDD2, HSD17B14, PFN2, PPP1R3C, PROCR, KLKB1, DNMT3L, FAIM, TCF4, HLA-DOA, SPP1, ESRRG, …	1172	8785	16881	1.11163	0.027976	0.00404534	0.036749
KEGG_PATHWAY	hsa05330:Allograft rejection	13	0.969426	2.272e-05	HLA-DQB1, HLA-DRB1, HLA-DMB, HLA-DMA, HLA-DQA1, HLA-F, CD86, HLA-DPA1, HLA-DPB1, FAS, HLA-DOA, HLA-DOB, HLA-DRA	568	37	6910	4.27436	0.00625117	0.000368802	0.0299704
KEGG_PATHWAY	hsa04612:Antigen processing and presentation	19	1.41685	2.97925e-05	HLA-DQB1, CD8A, HLA-DRB1, RFX5, IFI30, CTSS, HLA-DMB, HLA-DMA, CD74, HLA-DQA1, HLA-F, HSPA2, TAP2, TAP1, HLA-DPA1, HLA-DPB1, HLA-DOA, HLA-DOB, HLA-DRA	568	76	6910	3.04137	0.00818915	0.000456721	0.0392982
GOTERM_BP_DIRECT	GO:0051607~defense response to virus	28	2.08799	3.6948e-05	PTPRC, RNASEL, CD8A, F2RL1, CXCL9, SAMHD1, APOBEC3G, IFI16, OAS2, STAT1, TRIM22, TLR8, ISG20, CXCL10, APOBEC3B, IFIT3, NLRC5, ABCC9, CD86, ISG15, BCL2, DDX60, IRF1, PYCARD, SLFN11, MX1, GBP3, GBP1	1191	165	16792	2.39257	0.148255	0.00533466	0.0692486
KEGG_PATHWAY	hsa05146:Amoebiasis	23	1.71514	3.70821e-05	COL4A4, PIK3CG, COL4A3, COL4A2, ADCY1, COL4A1, COL3A1, CXCL8, COL5A2, ITGAM, TGFB1, COL5A1, COL4A5, TGFB2, LAMA2, SERPINB9, LAMA3, LAMC3, COL1A2, SERPINB1, COL1A1, LAMB1, PIK3R3	568	106	6910	2.63968	0.0101827	0.000538531	0.0489114
GOTERM_MF_DIRECT	GO:0043394~proteoglycan binding	7	0.521999	3.75234e-05	CTSK, FCN2, CECR1, CTSS, THBS1, SLIT2, COL5A1	1172	11	16881	9.16592	0.046001	0.0058693	0.0609836
GOTERM_MF_DIRECT	GO:0048407~platelet-derived growth factor binding	7	0.521999	3.75234e-05	COL4A1, PDGFA, COL3A1, PDGFRA, COL1A2, COL1A1, COL5A1	1172	11	16881	9.16592	0.046001	0.0058693	0.0609836
KEGG_PATHWAY	hsa04640:Hematopoietic cell lineage	20	1.49142	4.28218e-05	CD3G, CD8A, HLA-DRB1, CD3D, IL7, MME, KITLG, ITGA2, IL6R, ITGA4, IL7R, ITGAM, CD1E, ITGA6, CD44, FCGR1A, MS4A1, CD2, CD24, HLA-DRA	568	85	6910	2.86247	0.0117495	0.000590779	0.05648
GOTERM_MF_DIRECT	GO:0005518~collagen binding	15	1.11857	4.68774e-05	ASPN, VWF, CTSK, COL14A1, CD44, PDGFA, LUM, ITGA2, DCN, CTSS, SPARC, ANTXR1, SRGN, ADAM9, PCOLCE2	1172	60	16881	3.6009	0.0571353	0.00651563	0.0761806
KEGG_PATHWAY	hsa04060:Cytokine-cytokine receptor interaction	38	2.83371	4.71907e-05	TNFRSF21, CCL3, CCL2, PDGFA, OSMR, IL18, CXCL9, CXCL8, KITLG, CCL8, IL15, IL7R, CXCL11, CCL5, CCL4, TGFB1, CXCL10, TGFB2, TNFRSF11A, CCL20, CXCR4, CCL21, IL1RAP, CSF2RB, TNFRSF19, FAS, CD27, IL7, TNFRSF17, CCL19, ACKR3, IL6R, HGF, TNFSF13B, CCR5, CXCL13, CCR2, PDGFRA	568	230	6910	2.00995	0.0129405	0.000620043	0.0622407
GOTERM_MF_DIRECT	GO:0023026~MHC class II protein complex binding	8	0.59657	4.97657e-05	HLA-DRB1, MS4A1, HLA-DMB, HLA-DOA, HLA-DMA, HLA-DOB, CD74, HLA-DRA	1172	16	16881	7.20179	0.060547	0.00622629	0.0808726
GOTERM_MF_DIRECT	GO:0005102~receptor binding	46	3.43028	5.5083e-05	CXCL1, PLXNC1, UTS2, CCL2, VTCN1, F2RL1, IGFBP6, GJA1, CD72, AMN, FKBP1B, TGFB2, CXCL10, SERPINE2, ITGB8, SMARCD3, APOF, CD2, MSN, ANGPTL2, FYB, ITK, CRTAM, AR, RAB8B, ANXA1, ARPP19, FZD1, EPHX2, WIPI1, PLG, GAS6, HLA-F, LAMA2, CD86, LAMA3, TNFSF13B, SRPX2, CD58, HAO2, JAK1, GFRA1, JAK3, SEMA4D, CD200, CROT	1172	353	16881	1.87695	0.0667956	0.00626494	0.0895099
GOTERM_BP_DIRECT	GO:0017144~drug metabolic process	10	0.745712	6.37067e-05	CYP3A4, FMO5, CYP2C19, CYP2C9, FMO1, FMO2, CYP2D6, EPHX2, CYP2A6, CYP1A2	1191	27	16792	5.22188	0.241708	0.00888567	0.119372
KEGG_PATHWAY	hsa05164:Influenza A	31	2.31171	6.75721e-05	HLA-DQB1, RNASEL, CCL2, HLA-DRB1, AGFG1, IL18, CXCL8, OAS2, HLA-DMB, CCL5, HLA-DMA, CXCL10, HSPA2, PYCARD, HLA-DPB1, FAS, HLA-DOA, PIK3R3, MX1, CASP1, HLA-DOB, PIK3CG, SOCS3, STAT1, PLG, HLA-DQA1, JUN, JAK1, HLA-DPA1, KPNA2, HLA-DRA	568	174	6910	2.16742	0.0184777	0.000847392	0.0891111
KEGG_PATHWAY	hsa04115:p53 signaling pathway	17	1.26771	7.37369e-05	CDK1, ZMAT3, ATR, CCNG2, CCNB1, CCNE2, TP53I3, CDKN1A, CCND1, CCNB2, CCND2, RRM2, BAX, DDB2, MDM2, FAS, THBS1	568	67	6910	3.08677	0.0201464	0.000884484	0.0972374
GOTERM_BP_DIRECT	GO:0050853~B cell receptor signaling pathway	14	1.044	7.63941e-05	IGHG1, PTPRC, VAV3, NCKAP1L, IGHM, KLHL6, BCL2, LCK, MNDA, LIME1, IGKC, IGLC1, IGLL5, SYK	1191	54	16792	3.65532	0.282364	0.0103149	0.143129
GOTERM_BP_DIRECT	GO:0043154~negative regulation of cysteine-type endopeptidase activity involved in apoptotic process	16	1.19314	7.81758e-05	CRYAB, VIL1, LEF1, BIRC5, HGF, AQP1, GAS6, SERPINB9, LAMP3, CD44, TNFAIP8, MDM2, MICAL1, THBS1, IFI6, CD27	1191	69	16792	3.26935	0.287896	0.0102361	0.146465
GOTERM_BP_DIRECT	GO:0090023~positive regulation of neutrophil chemotaxis	9	0.671141	8.09082e-05	CXCL1, C5AR1, CCL21, CXCL2, CXCL8, NCKAP1L, CCL19, XCL1, CD74	1191	22	16792	5.7678	0.296297	0.010282	0.15158
KEGG_PATHWAY	hsa05310:Asthma	11	0.820283	8.48662e-05	FCER1A, HLA-DQB1, HLA-DRB1, HLA-DPA1, HLA-DPB1, HLA-DMB, HLA-DOA, HLA-DMA, HLA-DOB, HLA-DQA1, HLA-DRA	568	30	6910	4.46068	0.0231519	0.000975527	0.111906
GOTERM_BP_DIRECT	GO:0019882~antigen processing and presentation	14	1.044	9.36226e-05	HLA-DQB1, MICB, RAB8B, HLA-DRB1, CD8A, HLA-DPA1, MR1, HLA-DPB1, CTSS, HLA-DMB, HLA-DQA1, CD74, CLEC4M, HLA-DRA	1191	55	16792	3.58886	0.334104	0.0115505	0.175381
GOTERM_BP_DIRECT	GO:0031295~T cell costimulation	17	1.26771	9.55953e-05	HLA-DQB1, CD3G, HLA-DRB1, CD3D, CCL19, TRBC1, HLA-DQA1, CD86, TRAC, TNFSF13B, CCL21, LCK, KLRC4-KLRK1, HLA-DPA1, CD24, HLA-DPB1, HLA-DRA	1191	78	16792	3.07288	0.339785	0.0114668	0.179073
KEGG_PATHWAY	hsa04062:Chemokine signaling pathway	32	2.38628	9.91407e-05	CXCL1, CCL3, ADCY1, CCL2, ADCY7, CXCL2, CXCL9, CXCL8, CCL8, CXCL6, CXCL11, CCL5, CCL4, CXCL10, CCL20, CXCR4, CCL21, PIK3R3, PIK3CG, ITK, VAV3, CCL19, STAT1, CCL18, CCL14, CCR5, CXCL13, CCR2, GNB4, JAK3, GRK5, XCL1	568	186	6910	2.09299	0.0269932	0.00109397	0.130717
GOTERM_MF_DIRECT	GO:0005178~integrin binding	20	1.49142	9.95179e-05	COL4A3, NPNT, COL3A1, FBN1, ITGA2, TSPAN8, EDIL3, COL5A1, THY1, VWF, FBLN1, WISP1, ITGA6, CTGF, FBLN5, THBS1, GPNMB, SYK, ADAM9, CYR61	1172	105	16881	2.74354	0.117416	0.0103544	0.161662
GOTERM_BP_DIRECT	GO:0042127~regulation of cell proliferation	29	2.16257	0.00011041	FXYD2, TNFRSF21, FOXM1, TNC, CXCL2, PTGS1, EZH2, CXCL9, JAG1, CXCL6, CXCL11, SOX9, CXCL10, CDCA7, FAS, CD27, TES, ITK, SGK1, TRNP1, MZB1, ANXA1, S100A11, PLA2G4A, CXCL13, JUN, LCK, ACE2, JAK1	1191	185	16792	2.21013	0.380931	0.0128769	0.206798
GOTERM_BP_DIRECT	GO:0007267~cell-cell signaling	36	2.68456	0.000116778	FGFR2, CCL3, PDGFA, IL18, CXCL9, GJA1, CCL8, IL15, CXCL6, GREM1, CCL5, CXCL11, CCL4, CXCL10, TGFB2, TNFRSF11A, WISP1, CCL20, CTGF, CCL21, FAT1, SRD5A2, CYR61, AR, IL7, FZD1, CHST4, CCL18, LILRB2, CD86, SIRPG, CCR5, CXCL13, ADRA1A, GDF15, XCL1	1191	254	16792	1.99829	0.397818	0.0132586	0.218712
GOTERM_BP_DIRECT	GO:0000281~mitotic cytokinesis	10	0.745712	0.000119642	CKAP2, KIF4A, CENPA, ANK3, NUSAP1, SPTBN1, ANLN, STMN1, RACGAP1, KIF20A	1191	29	16792	4.86175	0.405263	0.0132356	0.22407
GOTERM_BP_DIRECT	GO:0001503~ossification	17	1.26771	0.000131048	TWSG1, MGP, SPARC, SOX9, SLC26A2, COL5A2, TNFRSF11A, CTGF, BCL2, RASSF2, SORT1, STC1, RUNX2, BMP5, RUNX3, SPP1, CDH11	1191	80	16792	2.99605	0.434009	0.0141287	0.245407
GOTERM_MF_DIRECT	GO:0004497~monooxygenase activity	14	1.044	0.000134817	CYP3A4, CYP3A5, CYP3A7, CYP2C19, CYP2C9, CYP2D6, CYP1A2, CYP3A43, CYP4A11, PTGIS, FMO1, KLKB1, FMO2, CYP2A7	1172	58	16881	3.47673	0.155666	0.0129316	0.218945
GOTERM_MF_DIRECT	GO:0005544~calcium-dependent phospholipid binding	14	1.044	0.000134817	ANXA1, SYT9, TC2N, ANXA5, ANXA4, ANXA3, ANXA2, ANXA2P2, MCTP1, PLA2G4A, ANXA8, ANXA10, ANXA13, SYT13	1172	58	16881	3.47673	0.155666	0.0129316	0.218945
GOTERM_BP_DIRECT	GO:0019373~epoxygenase P450 pathway	8	0.59657	0.000140042	CYP2A13, CYP4A11, CYP2C19, CYP2C9, EPHX2, CYP2A6, CYP2A7, CYP1A2	1191	18	16792	6.26626	0.455694	0.0147257	0.262229
KEGG_PATHWAY	hsa05416:Viral myocarditis	15	1.11857	0.000149687	HLA-DQB1, HLA-DRB1, HLA-DMB, HLA-DMA, HLA-DQA1, HLA-F, CCND1, CD86, SGCD, HLA-DPA1, HLA-DPB1, HLA-DOA, HLA-DOB, HLA-DRA, SGCB	568	57	6910	3.20145	0.0404748	0.00158784	0.197302
GOTERM_BP_DIRECT	GO:0008202~steroid metabolic process	12	0.894855	0.000150617	CYP3A4, CYP3A5, G6PC, NR1I2, CYP3A7, CYP2C19, CYP2C9, AKR1B10, SLC37A4, CYP2D6, CYP2A6, SULT1E1	1191	43	16792	3.93463	0.480132	0.0154551	0.282005
KEGG_PATHWAY	hsa05321:Inflammatory bowel disease (IBD)	16	1.19314	0.000154623	HLA-DQB1, HLA-DRB1, IL18, RORC, HLA-DMB, STAT1, HLA-DMA, TGFB1, HLA-DQA1, TGFB2, JUN, HLA-DPA1, HLA-DPB1, HLA-DOA, HLA-DOB, HLA-DRA	568	64	6910	3.04137	0.0417812	0.00157946	0.203801
GOTERM_BP_DIRECT	GO:0030334~regulation of cell migration	16	1.19314	0.000180136	KIF14, PLXNC1, SGK1, ENPP2, DPYSL3, JAG1, NEXN, TGFB1, PRKX, THY1, AJUBA, LAMA2, LAMA3, SERPINE2, CXCR4, PHLDA2	1191	74	16792	3.04845	0.542694	0.0180309	0.337186
GOTERM_BP_DIRECT	GO:0034097~response to cytokine	13	0.969426	0.000220419	TYMS, IFI27, TNFRSF11A, OSMR, JUN, BCL2, COL3A1, ACP5, IL6R, SPARC, STAT1, PLA2G5, TIMP1	1191	52	16792	3.52477	0.616104	0.0215237	0.412441
GOTERM_CC_DIRECT	GO:0005829~cytosol	277	20.6562	0.000255857	ITGB3BP, SCPEP1, LDHB, S100A6, AURKA, PTTG1, MYLIP, GPCPD1, RNF213, BBOX1, SERPINE2, ISG15, CTGF, MAT1A, CH25H, DEPDC1B, FAS, CDCA3, SYK, PIK3CG, CRYAB, HKDC1, VPS41, THY1, MAD2L1, TACSTD2, ZWINT, JUN, CCR2, RGCC, RPS11, RBP4, KIF4A, RBP1, NEK2, HSD17B14, PFKFB3, ACP5, OAS2, EPHB1, ADA, PPP1R3C, VRK1, DNMT3L, CDC42EP3, AGBL2, SMAD9, OSBPL3, LGALS4, UPB1, NUF2, NCKAP1L, CDC20, NDC80, ACACB, RERG, …	1258	3315	18224	1.21048	0.135276	0.0103281	0.374392
KEGG_PATHWAY	hsa04145:Phagosome	27	2.01342	0.000259846	HLA-DQB1, HLA-DRB1, C1R, HLA-DMB, HLA-DMA, ITGAM, ITGAV, TAP2, FCGR1A, TAP1, TUBB6, HLA-DPB1, THBS1, TUBA1A, HLA-DOA, THBS2, HLA-DOB, ITGA2, CTSS, HLA-DQA1, HLA-F, CLEC4M, ATP6V1C1, HLA-DPA1, FCGR2A, CLEC7A, HLA-DRA	568	153	6910	2.14685	0.0692148	0.00255839	0.342272
GOTERM_MF_DIRECT	GO:0001968~fibronectin binding	9	0.671141	0.000264609	CTSK, FBLN1, LPA, CTGF, ITGAV, CCDC80, ITGA4, CTSS, THBS1	1172	26	16881	4.98586	0.282605	0.0234443	0.429303
GOTERM_MF_DIRECT	GO:0008395~steroid hydroxylase activity	9	0.671141	0.000264609	CYP3A4, CYP2A13, CYP3A7, CYP2C19, CYP2C9, CH25H, CYP2D6, CYP2A6, CYP2A7	1172	26	16881	4.98586	0.282605	0.0234443	0.429303
GOTERM_CC_DIRECT	GO:0000777~condensed chromosome kinetochore	17	1.26771	0.000267101	ITGB3BP, MEAF6, CENPM, NEK2, NUF2, NDC80, BIRC5, CENPK, CENPH, SPC25, MAD2L1, ZWINT, RASSF2, BUB1, BUB1B, CENPW, CENPU	1258	87	18224	2.83069	0.140783	0.0100646	0.390815
GOTERM_BP_DIRECT	GO:0009636~response to toxic substance	17	1.26771	0.000273709	CDK1, CCL3, EPHX2, ASNS, CCL5, CCL4, INMT, DHRS2, TYMS, GLYAT, CDKN1A, BCL2, BAX, MDM2, FAS, NQO1, GSTP1	1191	85	16792	2.81982	0.695438	0.0260736	0.511913
GOTERM_BP_DIRECT	GO:0051301~cell division	44	3.28113	0.000291195	ITGB3BP, NEK2, NEDD9, AURKA, PTTG1, CCNG2, CCNE2, SPC25, VRK1, CDCA7, HMCN1, NCAPG, OIP5, BUB1, TUBA1A, CCNA2, HELLS, CDCA3, CDC7, KIF14, CDK1, CDC6, KIF11, ARPP19, NUF2, TPX2, CENPF, NDC80, CDC20, BIRC5, RB1, UBE2C, SMC2, MCM5, CCNB1, CCND1, CCNB2, MAD2L1, CCND2, ZWINT, CKS2, BUB1B, CENPW, MIS18BP1	1191	350	16792	1.77246	0.717716	0.027122	0.544533
GOTERM_MF_DIRECT	GO:0019825~oxygen binding	12	0.894855	0.000292015	CYP3A4, CYP2A13, CYP3A5, CYP4A11, CYP3A7, CYP2C19, CYP2C9, CYP2D6, CYP26A1, CYP2A7, CYP1A2, CBS	1172	47	16881	3.67751	0.306866	0.0241394	0.473668
GOTERM_BP_DIRECT	GO:0030890~positive regulation of B cell proliferation	11	0.820283	0.000293308	PTPRC, CDKN1A, VAV3, TNFSF13B, SLC39A10, IL7, BCL2, NCKAP1L, CD74, SASH3, ADA	1191	39	16792	3.97666	0.720296	0.0267428	0.548474
GOTERM_BP_DIRECT	GO:0050850~positive regulation of calcium-mediated signaling	8	0.59657	0.00030083	P2RX5, FCER1A, CCL3, CD8A, CCL4, TRAT1, ADA, SYK	1191	20	16792	5.63963	0.729288	0.0268557	0.562502
GOTERM_CC_DIRECT	GO:0005587~collagen type IV trimer	5	0.372856	0.00030188	COL4A4, COL4A3, COL4A2, COL4A1, COL4A5	1258	6	18224	12.0721	0.157594	0.0106611	0.441598
GOTERM_BP_DIRECT	GO:0010951~negative regulation of endopeptidase activity	21	1.566	0.00031555	C3P1, COL4A3, PZP, LXN, SPINT1, PAPLN, PTTG1, TIMP1, SERPINB9, LPA, SERPINE2, CARD16, ITIH1, SPINT2, SERPINB8, COL6A3, SERPINB1, ITIH5, WFDC1, TFPI2, CRIM1	1191	121	16792	2.44695	0.746058	0.0275848	0.58995
GOTERM_MF_DIRECT	GO:0008392~arachidonic acid epoxygenase activity	7	0.521999	0.000319173	CYP2A13, CYP4A11, CYP2C19, CYP2C9, CYP2D6, CYP2A6, CYP2A7	1172	15	16881	6.72167	0.330099	0.0247282	0.517612
GOTERM_BP_DIRECT	GO:2000406~positive regulation of T cell migration	6	0.447427	0.000330412	CCL20, CCL21, PYCARD, ITGA4, CCL5, CXCL10	1191	10	16792	8.45945	0.761936	0.0282963	0.617655
GOTERM_BP_DIRECT	GO:0016098~monoterpenoid metabolic process	5	0.372856	0.000335247	CYP3A4, CYP2C19, CYP2C9, CYP2D6, CYP1A2	1191	6	16792	11.7492	0.766885	0.0281496	0.626666
GOTERM_BP_DIRECT	GO:0042737~drug catabolic process	5	0.372856	0.000335247	CYP3A4, CYP3A5, CYP2C9, CYP2D6, CYP1A2	1191	6	16792	11.7492	0.766885	0.0281496	0.626666
GOTERM_BP_DIRECT	GO:0030855~epithelial cell differentiation	15	1.11857	0.000339102	FGFR2, CDK1, COL4A1, LGALS3, ELF3, CDHR2, VIL1, FZD1, DHRS9, EHF, FZD2, TAGLN2, ANXA4, TAGLN, PCNA	1191	70	16792	3.02123	0.770756	0.0279289	0.63385
KEGG_PATHWAY	hsa00590:Arachidonic acid metabolism	15	1.11857	0.000385607	CYP2C19, CYP2C9, PTGS1, EPHX2, GPX2, CYP4A11, PLA2G4A, PTGIS, PTGDS, GPX3, PLA2G2A, GPX8, ALOX5, GPX7, PLA2G5	568	62	6910	2.94326	0.100978	0.00366389	0.507537
GOTERM_BP_DIRECT	GO:0008283~cell proliferation	45	3.3557	0.00039976	BCAT1, CXCL1, STIL, E2F8, KITLG, EHF, MCM10, CD74, ISG20, TGFB2, HDGFRP3, EDNRA, GPC4, TYMS, BLZF1, BCL2, CKLF, BUB1, YAP1, BHLHE41, MYC, SYK, CYR61, CDK1, COL4A3, AR, CRIP1, DLGAP5, TPX2, CENPF, TNFRSF17, ITGA2, IFI16, GAS6, UHRF1, TNFSF13B, ASCC3, TACSTD2, PCNA, CKS2, BUB1B, YME1L1, TCF19, EMP1, MELK	1191	366	16792	1.73349	0.823865	0.0322333	0.74683
GOTERM_BP_DIRECT	GO:0001558~regulation of cell growth	16	1.19314	0.000439386	KIF14, FXYD2, SGK1, IGFBP7, FOXM1, IGFBP6, RB1, EPB41L3, BLZF1, WISP1, CTGF, FBLN5, H2AFY2, WFDC1, CRIM1, CYR61	1191	80	16792	2.81982	0.851723	0.0347284	0.820571
GOTERM_CC_DIRECT	GO:0045121~membrane raft	29	2.16257	0.000442384	LDHB, CAV2, ADCY1, TLR1, RHOQ, GJA1, GPRC5B, EPHB1, CD48, EDNRB, ANK2, KIRREL, HPSE, SYNJ2, FAS, CD24, PAG1, PPP2R1B, RAP2B, PTPRC, PODXL, CAPN2, BIRC3, ANXA2, THY1, LCK, ACE2, ANXA13, SMURF2	1258	206	18224	2.03936	0.222234	0.0146753	0.64651
GOTERM_BP_DIRECT	GO:0050680~negative regulation of epithelial cell proliferation	13	0.969426	0.000458494	FGFR2, AR, IFT80, RB1, SOX9, TGFB1, PBLD, TGFB2, CDKN1C, GPC3, IFT57, WFDC1, RUNX3	1191	56	16792	3.273	0.863536	0.0355648	0.85611
GOTERM_MF_DIRECT	GO:0042605~peptide antigen binding	9	0.671141	0.000464847	HLA-DQB1, HLA-DRB1, TAP1, HLA-DPA1, HLA-DPB1, HLA-DQA1, CLEC4M, HLA-DRA, HLA-F	1172	28	16881	4.62972	0.442068	0.0337422	0.75302
GOTERM_BP_DIRECT	GO:0060337~type I interferon signaling pathway	14	1.044	0.000467354	RNASEL, SAMHD1, OAS2, STAT1, ISG20, HLA-F, IFIT3, IFI27, ISG15, IRF1, JAK1, MX1, IFI6, GBP2	1191	64	16792	3.08417	0.86869	0.0356041	0.872585
GOTERM_BP_DIRECT	GO:0007204~positive regulation of cytosolic calcium ion concentration	22	1.64057	0.000475539	PIK3CG, UTS2, C5AR1, CYSLTR1, PTGER4, SWAP70, F2RL1, GJA1, CD52, FPR3, LPAR1, GPER1, EDNRA, EDNRB, CCR5, CXCR4, CXCL13, CCR2, AVPR1A, PDGFRA, ADRA1A, CD24	1191	134	16792	2.31477	0.873278	0.0355925	0.887804
GOTERM_CC_DIRECT	GO:0005581~collagen trimer	17	1.26771	0.000513735	COL4A4, COL4A3, CTHRC1, COL3A1, COL15A1, EMILIN2, COL5A2, COL5A1, COL4A5, TIMP1, COL14A1, FCN2, FCN1, COL6A3, COL1A2, COL12A1, COL1A1	1258	92	18224	2.67685	0.253139	0.0160846	0.750419
GOTERM_MF_DIRECT	GO:0004859~phospholipase inhibitor activity	6	0.447427	0.000516584	ANXA1, ANXA5, ANXA4, ANXA3, ANXA2, ANXA2P2	1172	11	16881	7.8565	0.477161	0.0353855	0.836501
GOTERM_BP_DIRECT	GO:0001525~angiogenesis	31	2.31171	0.000524317	FGFR2, EMCN, CCL2, PDGFA, IL18, CXCL8, JAG1, ELK3, RNF213, MMP2, EPHB1, PRKX, TGFB2, CTGF, ITGAV, TMEM100, SYK, PIK3CG, COL4A2, VAV3, NRXN3, MMP19, COL15A1, ACKR3, MCAM, ANXA2, THY1, THSD7A, SRPX2, ID1, JUN	1191	223	16792	1.95996	0.897481	0.0385097	0.978446
GOTERM_BP_DIRECT	GO:0048247~lymphocyte chemotaxis	9	0.671141	0.000536612	CCL3, CCL14, CCL2, CCL20, CCL21, CKLF, CCL8, CCL19, CCL18	1191	28	16792	4.53185	0.902814	0.0387403	1.00128
GOTERM_BP_DIRECT	GO:0007229~integrin-mediated signaling pathway	18	1.34228	0.000551548	ITGB3BP, VAV3, FUT8, COL3A1, ITGA2, NEDD9, ITGA4, ITGAM, ITGBL1, CD47, FBLN1, ITGA6, CTGF, ITGB8, ITGAV, ADAMDEC1, ADAM9, SYK	1191	99	16792	2.56347	0.908922	0.0391471	1.02902
GOTERM_CC_DIRECT	GO:0016323~basolateral plasma membrane	26	1.93885	0.000634301	KCNJ16, FXYD2, CLDN7, C5AR1, SLC16A10, ANXA1, AQP4, CFTR, IL6R, AQP1, SLC7A6, ANXA2, EPCAM, ANK2, ANK3, ST14, ADRA2A, ANXA13, SLC4A7, ABCC4, ABCC1, STK39, HEPH, SLC39A5, MSN, ADAM9	1258	180	18224	2.09249	0.302601	0.0187895	0.92577
GOTERM_CC_DIRECT	GO:0016020~membrane	190	14.1685	0.000645135	ITGB3BP, LDHB, PDGFA, PRR11, TLR1, DNAJB14, TTK, AQP4, CD52, IL15, JAG1, RNF213, CD48, ST3GAL1, COLCA1, CFI, FAS, CDH23, F11, PIK3CG, CD3G, GBP5, MYO6, STMN2, LRRC1, VPS41, GEM, METTL7A, SPA17, HLA-DQA1, BICD1, HLA-F, CLEC4M, OGFRL1, LILRB2, SIRPG, VSIG2, LAMC3, ASCC3, TACSTD2, PDGFRA, YME1L1, STMN1, RPS11, BTN3A3, GBP3, FILIP1L, EMP1, FGFR2, ERMP1, CAV2, PLXNC1, MAMDC4, KIF4A, HLA-DRB1, CYSLTR1,…	1258	2200	18224	1.25111	0.306882	0.0181608	0.941512
GOTERM_MF_DIRECT	GO:0043027~cysteine-type endopeptidase inhibitor activity involved in apoptotic process	8	0.59657	0.000693594	SERPINB9, VIL1, TNFAIP8, LEF1, BIRC5, BIRC3, GAS6, CD27	1172	23	16881	5.00994	0.581368	0.0447953	1.12162
GOTERM_BP_DIRECT	GO:0050852~T cell receptor signaling pathway	23	1.71514	0.000740028	HLA-DQB1, FYB, TNFRSF21, PTPRC, ITK, CD3G, HLA-DRB1, CD3D, THEMIS, PTPN22, TRBC1, HLA-DQA1, TRAT1, THY1, PSMB9, TRAC, LCK, LIME1, HLA-DPA1, HLA-DPB1, PAG1, LCP2, HLA-DRA	1191	148	16792	2.19107	0.95985	0.0513421	1.37835
GOTERM_BP_DIRECT	GO:0009612~response to mechanical stimulus	13	0.969426	0.000755019	CCL2, PTGER4, TNC, COL3A1, CHI3L1, ASNS, DCN, STAT1, PSPH, CCNB1, BTG2, JUN, THBS1	1191	59	16792	3.10658	0.962382	0.0515326	1.40609
GOTERM_BP_DIRECT	GO:0002407~dendritic cell chemotaxis	7	0.521999	0.000783944	PIK3CG, CCR5, CXCR4, CCL21, CCR2, CCL19, CCL5	1191	17	16792	5.8055	0.966826	0.0526281	1.45958
GOTERM_BP_DIRECT	GO:0031589~cell-substrate adhesion	7	0.521999	0.000783944	VWF, ITGA6, ITGAV, ITGA2, EPHB1, GAS6, PRKX	1191	17	16792	5.8055	0.966826	0.0526281	1.45958
KEGG_PATHWAY	hsa05320:Autoimmune thyroid disease	13	0.969426	0.000808812	HLA-DQB1, HLA-DRB1, HLA-DMB, HLA-DMA, HLA-DQA1, HLA-F, CD86, HLA-DPA1, HLA-DPB1, FAS, HLA-DOA, HLA-DOB, HLA-DRA	568	52	6910	3.04137	0.200143	0.00741644	1.06182
GOTERM_BP_DIRECT	GO:0022617~extracellular matrix disassembly	15	1.11857	0.000810381	FBN1, MMP19, MMP7, CTSS, DCN, CAPN2, MMP2, PLG, TIMP1, CTSK, LAMA3, CD44, GSN, KLKB1, SPP1	1191	76	16792	2.78271	0.970427	0.0535283	1.50845
GOTERM_BP_DIRECT	GO:0007052~mitotic spindle organization	9	0.671141	0.000890081	CCNB1, STIL, SPC25, KIF11, PLK2, TTK, NDC80, AURKA, STMN1	1191	30	16792	4.22972	0.979086	0.0577622	1.65564
GOTERM_BP_DIRECT	GO:0010628~positive regulation of gene expression	34	2.53542	0.000920718	CCL3, TNC, VIM, MITF, IQGAP3, GJA1, PTPN22, IL7R, TGFB1, TGFB2, ANK2, ANK3, ITGB8, CTGF, GSN, TRIM6, MSN, MYC, CDK1, AR, TESC, EPHX2, LEF1, GPER1, GAS6, SERPINB9, FBLN1, NR1I2, LAMP3, ID1, RGCC, MDM2, CUX2, PRDM1	1191	262	16792	1.82965	0.981694	0.0588135	1.71216
GOTERM_BP_DIRECT	GO:0042738~exogenous drug catabolic process	6	0.447427	0.000920989	CYP3A4, NR1I2, CYP2C19, CYP2C9, CYP2A6, CYP1A2	1191	12	16792	7.04954	0.981715	0.0579782	1.71266
GOTERM_MF_DIRECT	GO:0017147~Wnt-protein binding	9	0.671141	0.00097943	CTHRC1, FZD1, FZD2, WLS, FRZB, APCDD1, PTPRO, FZD7, FZD6	1172	31	16881	4.18169	0.707645	0.059637	1.5804
GOTERM_BP_DIRECT	GO:0002690~positive regulation of leukocyte chemotaxis	7	0.521999	0.00110589	F2RL1, CXCL9, CXCL6, IL6R, CXCL11, XCL1, CXCL10	1191	18	16792	5.48297	0.991816	0.0682307	2.05314
GOTERM_BP_DIRECT	GO:0006915~apoptotic process	61	4.54884	0.00118767	ITGB3BP, IER3, FAM3B, GJA1, PDCD2, CDCA7, CXCR4, FAS, CASP1, MX1, CDK1, SGK1, C5AR1, GZMA, VIL1, TPX2, RB1, MCM2, STK4, TOX3, SERPINB9, EPB41L3, TNFAIP8, BUB1B, CTSC, MELK, FGFR2, TNFRSF21, GULP1, STK17B, GPR65, BEX2, STK17A, GREM1, PLAGL1, TRIM69, BCL2, CD2, BUB1, PYCARD, TNFRSF19, FAIM, TRAF5, PHLDA2, PHLDA1, CKAP2, MZB1, CHI3L1, BIRC5, BIRC3, STAT1, CAPN3, GAS6, AIM2, IFT57, BAX, IRF1, ADRA1A,…	1191	567	16792	1.51683	0.994265	0.07207	2.20337
KEGG_PATHWAY	hsa04976:Bile secretion	15	1.11857	0.00120071	FXYD2, ADCY1, NCEH1, ATP1B3, ADCY7, AQP4, CFTR, ABCB1, AQP1, ABCG2, CYP7A1, KCNN2, ABCC4, SLC51B, SLC51A	568	69	6910	2.64467	0.282221	0.0106396	1.57255
GOTERM_CC_DIRECT	GO:0031232~extrinsic component of external side of plasma membrane	5	0.372856	0.00125891	TF, SERPINE2, FCN1, ANXA1, PLG	1258	8	18224	9.05405	0.511057	0.033498	1.82958
KEGG_PATHWAY	hsa05340:Primary immunodeficiency	10	0.745712	0.00128381	DCLRE1C, PTPRC, CD3D, CD8A, RFX5, TAP2, LCK, TAP1, IL7R, ADA	568	34	6910	3.57809	0.298518	0.0110188	1.68054
GOTERM_MF_DIRECT	GO:0031730~CCR5 chemokine receptor binding	5	0.372856	0.00128579	CCL3, JAK1, CCL5, STAT1, CCL4	1172	8	16881	9.00224	0.801051	0.074009	2.06991
GOTERM_MF_DIRECT	GO:0047760~butyrate-CoA ligase activity	5	0.372856	0.00128579	ACSM2B, ACSM3, ACSM2A, AACS, ACSM5	1172	8	16881	9.00224	0.801051	0.074009	2.06991
GOTERM_BP_DIRECT	GO:2000134~negative regulation of G1/S transition of mitotic cell cycle	8	0.59657	0.00136417	CDKN1A, DACT1, BCL2, EZH2, RB1, SLFN11, GPNMB, ZC3H12D	1191	25	16792	4.5117	0.997338	0.0812075	2.52687
GOTERM_BP_DIRECT	GO:0006260~DNA replication	23	1.71514	0.00137799	CDC7, CDK1, CDC6, GINS2, DTL, DBF4, NAP1L1, KIAA0101, RMI2, MCM2, ATR, MCM10, RNASEH2A, MCM3, MCM4, MCM5, MCM6, RFC3, RRM2, PCNA, RHNO1, FEN1, BARD1	1191	155	16792	2.09212	0.997493	0.0808892	2.55215
GOTERM_BP_DIRECT	GO:0007093~mitotic cell cycle checkpoint	9	0.671141	0.00140932	NABP1, MAD2L1, PLK2, ZWINT, BUB1, TTK, BUB1B, RB1, TGFB1	1191	32	16792	3.96537	0.997812	0.0815513	2.60945
GOTERM_BP_DIRECT	GO:0006270~DNA replication initiation	9	0.671141	0.00140932	CDC7, CCNE2, CDC6, MCM2, MCM3, MCM10, MCM4, MCM5, MCM6	1191	32	16792	3.96537	0.997812	0.0815513	2.60945
GOTERM_BP_DIRECT	GO:0048246~macrophage chemotaxis	6	0.447427	0.00140968	EDNRB, CCL3, CCL2, LGALS3, CKLF, CCL5	1191	13	16792	6.50727	0.997816	0.0805003	2.61011
GOTERM_BP_DIRECT	GO:0097284~hepatocyte apoptotic process	6	0.447427	0.00140968	PIK3CG, KRT18, GSN, RB1, FAS, STK4	1191	13	16792	6.50727	0.997816	0.0805003	2.61011
GOTERM_MF_DIRECT	GO:0008092~cytoskeletal protein binding	11	0.820283	0.00143592	FRMD3, SLC8A1, PACSIN3, ANK3, EPB41L4A, PDLIM3, MYLIP, CAPN2, TPM1, ANXA2, ANXA2P2	1172	48	16881	3.30082	0.835258	0.0787019	2.30895
GOTERM_BP_DIRECT	GO:0007067~mitotic nuclear division	32	2.38628	0.00146458	ITGB3BP, NEK2, NEDD9, ANLN, AURKA, PTTG1, CCNG2, SPC25, VRK1, OIP5, BUB1, CCNA2, HELLS, ASPM, CDCA3, CDC6, CDK1, KIF11, ARPP19, TPX2, NUF2, CENPF, NDC80, BIRC5, CDC20, HGF, PBK, GEM, CCNB2, CENPW, BUB1B, MIS18BP1	1191	248	16792	1.81924	0.99828	0.0824226	2.71045
GOTERM_BP_DIRECT	GO:0007160~cell-matrix adhesion	16	1.19314	0.00156097	EPDR1, NPNT, COL3A1, ITGA2, ITGA4, CD96, LYVE1, ITGA6, CD44, CTGF, ITGB8, HPSE, ITGAV, FBLN5, ADAMTS12, ADAM9	1191	90	16792	2.5065	0.998869	0.0864901	2.88637
GOTERM_BP_DIRECT	GO:0042632~cholesterol homeostasis	13	0.969426	0.0015969	ACSM3, G6PC, DGAT2, LCAT, IL18, CYP7A1, APOA5, SLC37A4, EPHX2, FABP4, CD24, MYLIP, LIPC	1191	64	16792	2.86387	0.999033	0.0872811	2.95187
GOTERM_CC_DIRECT	GO:0030669~clathrin-coated endocytic vesicle membrane	10	0.745712	0.00160801	HLA-DQB1, HLA-DRB1, FCGR1A, FCGR1B, HLA-DPA1, FZD2, HLA-DPB1, CD74, HLA-DQA1, HLA-DRA	1258	41	18224	3.53329	0.599118	0.0406981	2.33139
GOTERM_MF_DIRECT	GO:0016705~oxidoreductase activity, acting on paired donors, with incorporation or reduction of molecular oxygen	12	0.894855	0.00163592	CYP3A43, CYP3A4, CYP3A5, CYP4A11, PTGIS, CYP2C19, CYP2C9, KLKB1, CYP2D6, CYP26A1, CYP2A6, CYP2A7	1172	57	16881	3.03233	0.871877	0.0854633	2.62656
GOTERM_BP_DIRECT	GO:0050776~regulation of immune response	25	1.86428	0.00175565	CRTAM, MICB, CD3G, IGLV1-44, CD3D, CD8A, SELL, IGKV1-17, COL3A1, SLAMF7, ITGA4, TRBC1, HLA-F, CD96, LILRB2, TRAC, FCGR1A, COL1A2, IRF1, KLRC4-KLRK1, CD300LF, COL1A1, IGKC, CD200, IGLC1	1191	178	16792	1.98021	0.999515	0.094357	3.24076
KEGG_PATHWAY	hsa05215:Prostate cancer	17	1.26771	0.0018851	FGFR2, PIK3CG, AR, E2F3, PDGFA, LEF1, CREB5, RB1, CCNE2, CDKN1A, CCND1, BCL2, PDGFRA, MDM2, SRD5A2, PDGFD, PIK3R3	568	88	6910	2.35015	0.405943	0.0156573	2.45864
GOTERM_BP_DIRECT	GO:0019886~antigen processing and presentation of exogenous peptide antigen via MHC class II	16	1.19314	0.00195615	HLA-DQB1, KIF4A, KIF11, HLA-DRB1, IFI30, CTSS, HLA-DMB, RACGAP1, HLA-DMA, CD74, HLA-DQA1, HLA-DPA1, HLA-DPB1, HLA-DOA, HLA-DOB, HLA-DRA	1191	92	16792	2.45201	0.999797	0.103291	3.60448
GOTERM_MF_DIRECT	GO:0070330~aromatase activity	8	0.59657	0.00196798	CYP3A43, CYP3A4, CYP2A13, CYP3A5, CYP3A7, CYP2D6, CYP2A7, CYP1A2	1172	27	16881	4.26773	0.915605	0.0978822	3.15172
GOTERM_MF_DIRECT	GO:0005506~iron ion binding	22	1.64057	0.0020551	CYP3A4, CYP3A5, CYP3A7, CYP2C19, CYP2C9, CYP2D6, CYP26A1, CYP1A2, BBOX1, CYP3A43, CYP2A13, CYP4A11, PTGIS, KLKB1, CYP7A1, CH25H, AOX1, HAAO, CYP2A6, CYP2A7, ALOX5, SCD5	1172	153	16881	2.0711	0.924363	0.0981187	3.28908
GOTERM_CC_DIRECT	GO:0042555~MCM complex	5	0.372856	0.00214257	MCM2, MCM3, MCM4, MCM5, MCM6	1258	9	18224	8.04805	0.704264	0.0515906	3.09513
GOTERM_BP_DIRECT	GO:0006874~cellular calcium ion homeostasis	16	1.19314	0.00218299	CCL3, CCL2, PKHD1, SLC37A4, EPHX2, CCL19, CCL8, CCL5, TGFB1, CCL14, ANK2, ATP2A3, CCR2, TMEM165, STC1, HTR2B	1191	93	16792	2.42565	0.999924	0.113204	4.01442
GOTERM_BP_DIRECT	GO:0051281~positive regulation of release of sequestered calcium ion into cytosol	8	0.59657	0.00222483	BAX, CXCL9, GPER1, CXCL11, XCL1, CAPN3, CXCL10, THY1	1191	27	16792	4.1775	0.999937	0.113891	4.08985
KEGG_PATHWAY	hsa00052:Galactose metabolism	9	0.671141	0.0022584	GALK1, G6PC, GCK, HKDC1, AKR1B10, AKR1B1, GALT, PFKP, PFKM	568	30	6910	3.64965	0.464216	0.0181862	2.93883
GOTERM_MF_DIRECT	GO:0004872~receptor activity	28	2.08799	0.00227112	PKHD1, F2RL1, TLR1, TLR8, CD48, TNFRSF11A, PROCR, ITGB8, CD2, CSF2RB, GUCY1A3, TNFRSF19, FAS, LY75, CRTAM, NRXN3, TNFRSF17, CLEC4M, OGFRL1, LILRB2, CD86, LYVE1, THBD, TACSTD2, KLRC4-KLRK1, SEMA4D, ANTXR1, CD200	1172	217	16881	1.85853	0.942358	0.103942	3.62884
KEGG_PATHWAY	hsa05152:Tuberculosis	27	2.01342	0.0024258	HLA-DQB1, HLA-DRB1, IL18, TLR1, HLA-DMB, HLA-DMA, ITGAM, TGFB1, CD74, TGFB2, BCL2, FCGR1A, HLA-DPB1, HLA-DOA, HLA-DOB, SYK, RFX5, CTSS, STAT1, HLA-DQA1, CLEC4M, BAX, JAK1, HLA-DPA1, FCGR2A, CLEC7A, HLA-DRA	568	177	6910	1.85575	0.488463	0.0189702	3.15346
GOTERM_MF_DIRECT	GO:0016712~oxidoreductase activity, acting on paired donors, with incorporation or reduction of molecular oxygen, reduced flavin or flavoprotein as one donor, and incorporation of one atom of oxygen	6	0.447427	0.00265733	CYP3A4, CYP3A5, CYP2D6, CYP2A6, CYP2A7, CYP1A2	1172	15	16881	5.76143	0.964541	0.116338	4.2335
GOTERM_CC_DIRECT	GO:0005925~focal adhesion	43	3.20656	0.00287998	CAV2, ENAH, LIMA1, TNC, VIM, FERMT1, FHL2, MME, GJA1, NEDD9, CD44, PROCR, GSN, FAT1, ITGAV, MSN, TES, ADAM9, FLRT2, PTPRC, CAPN5, ANXA1, FZD1, NFASC, FBLIM1, ITGA2, SYNPO2, FZD2, ITGA4, NEXN, MCAM, ANXA5, CAPN2, PALLD, THY1, EPB41L2, AJUBA, ITGA6, JAK1, MARCKS, GRK5, RPS11, PNMA1	1258	391	18224	1.59314	0.805668	0.0659804	4.13957
GOTERM_MF_DIRECT	GO:0020037~heme binding	20	1.49142	0.00291001	CYP3A4, CYP3A5, CYP3A7, CYP2C19, CYP2C9, CYP2D6, PTGS1, CYP26A1, CYP1A2, CYP3A43, CYP2A13, CYP4A11, PTGIS, KLKB1, CYP7A1, GUCY1A2, CYP2A6, GUCY1A3, CYP2A7, CBS	1172	137	16881	2.10271	0.9742	0.12245	4.62717
GOTERM_BP_DIRECT	GO:0048661~positive regulation of smooth muscle cell proliferation	12	0.894855	0.00296626	FGFR2, IL18, JUN, AKR1B1, ABCC4, ITGA2, PDGFD, IL6R, THBS1, CCL5, STAT1, MYC	1191	60	16792	2.81982	0.999998	0.147242	5.41724
GOTERM_CC_DIRECT	GO:0071556~integral component of lumenal side of endoplasmic reticulum membrane	8	0.59657	0.00296833	HLA-DQB1, HLA-DRB1, HLA-DPA1, HLA-DPB1, CD74, HLA-DQA1, HLA-DRA, HLA-F	1258	29	18224	3.99627	0.815206	0.0653103	4.26399
GOTERM_MF_DIRECT	GO:0048248~CXCR3 chemokine receptor binding	4	0.298285	0.00299386	CXCL13, CXCL9, CXCL11, CXCL10	1172	5	16881	11.5229	0.976785	0.121691	4.75748
GOTERM_BP_DIRECT	GO:0007568~aging	23	1.71514	0.00306902	CCL2, SLC12A2, CRYAB, COL3A1, BCL2A1, MMP7, DCN, IL15, ADA, TGFB1, TIMP1, PCK1, CDKN1C, TYMS, EDNRB, CD86, CTGF, UCP2, JUN, ADRA1A, CTSC, LOXL2, NQO1	1191	165	16792	1.96533	0.999998	0.150235	5.59985
KEGG_PATHWAY	hsa00982:Drug metabolism - cytochrome P450	14	1.044	0.00310438	CYP3A4, CYP3A5, CYP2C19, CYP2C9, CYP2D6, CYP1A2, FMO5, FMO1, FMO2, ADH4, AOX1, CYP2A6, UGT2A3, GSTP1	568	68	6910	2.50466	0.576051	0.0235554	4.01899
GOTERM_BP_DIRECT	GO:0006706~steroid catabolic process	4	0.298285	0.0031848	CYP3A4, HSD17B14, SRD5A2, CYP1A2	1191	5	16792	11.2793	0.999999	0.153725	5.80517
GOTERM_BP_DIRECT	GO:0002503~peptide antigen assembly with MHC class II protein complex	4	0.298285	0.0031848	HLA-DRB1, HLA-DMB, HLA-DMA, HLA-DRA	1191	5	16792	11.2793	0.999999	0.153725	5.80517
KEGG_PATHWAY	hsa05161:Hepatitis B	23	1.71514	0.00340459	PIK3CG, E2F3, EGR2, CXCL8, BIRC5, CREB5, RB1, STAT1, TGFB1, TGFB2, CCNE2, CCND1, CDKN1A, JUN, BCL2, BAX, DDB2, PCNA, JAK1, FAS, PIK3R3, MYC, CCNA2	568	145	6910	1.9297	0.609868	0.0251189	4.39962
GOTERM_BP_DIRECT	GO:0008285~negative regulation of cell proliferation	44	3.28113	0.0034336	CXCL1, RARRES1, IGFBP7, IGFBP6, CXCL8, SOX4, TGFB1, TGFB2, SERPINE2, BCHE, CDKN2C, BCL11B, GPNMB, TES, DPT, CDC6, COL4A3, AR, TESC, CTBP2, S100A11, PTPN14, RB1, GPER1, FRZB, CDKN3, STK4, PLG, RERG, IFIT3, ATF5, NCK2, DHRS2, CDKN1A, SIRPG, BTG2, JUN, BTG3, RGCC, IRF1, ADRA1A, PMP22, LDOC1, BMP5	1191	396	16792	1.56656	1	0.162916	6.24498
GOTERM_BP_DIRECT	GO:0097421~liver regeneration	8	0.59657	0.00345325	TYMS, CCND1, UCP2, EZH2, PCNA, AURKA, MYC, TGFB1	1191	29	16792	3.8894	1	0.162007	6.27964
GOTERM_BP_DIRECT	GO:0001771~immunological synapse formation	5	0.372856	0.00372681	NCK2, CCL21, CCL19, DOCK8, EPHB1	1191	10	16792	7.04954	1	0.171846	6.76081
GOTERM_BP_DIRECT	GO:0061351~neural precursor cell proliferation	5	0.372856	0.00372681	TRNP1, SLC39A5, DBN1, EPHB1, MELK	1191	10	16792	7.04954	1	0.171846	6.76081
GOTERM_MF_DIRECT	GO:0005200~structural constituent of cytoskeleton	17	1.26771	0.00374391	FRMD3, EPB41L2, EPB41L3, KRT19, FRMD6, ANK2, ANK3, VIM, EPB41L4A, TUBB6, SPTBN1, NDC80, MSN, MYLIP, TUBA1A, TPM1, BICD1	1172	110	16881	2.22601	0.990972	0.145223	5.91564
GOTERM_MF_DIRECT	GO:0015026~coreceptor activity	8	0.59657	0.00375948	CD86, CCR5, CD8A, CXCR4, LY96, ITGAV, ACKR3, ITGA4	1172	30	16881	3.84096	0.991147	0.141428	5.93953
GOTERM_CC_DIRECT	GO:0030658~transport vesicle membrane	9	0.671141	0.00381008	HLA-DQB1, SCGN, CPE, HLA-DRB1, HLA-DPA1, HLA-DPB1, CD74, HLA-DQA1, HLA-DRA	1258	38	18224	3.43101	0.885624	0.080012	5.44198
KEGG_PATHWAY	hsa05168:Herpes simplex infection	27	2.01342	0.00386357	HLA-DQB1, RNASEL, CCL2, HLA-DRB1, IL15, OAS2, HLA-DMB, CCL5, HLA-DMA, CD74, TAP2, TAP1, HLA-DPB1, FAS, HLA-DOA, TRAF5, HLA-DOB, CDK1, SOCS3, ARNTL, STAT1, HLA-DQA1, HLA-F, JUN, JAK1, HLA-DPA1, HLA-DRA	568	183	6910	1.79491	0.656446	0.0277245	4.97886
GOTERM_BP_DIRECT	GO:0006977~DNA damage response, signal transduction by p53 class mediator resulting in cell cycle arrest	12	0.894855	0.00386553	CCNB1, PLAGL1, CDK1, CDKN1A, BTG2, PLK2, BAX, RGCC, PCNA, MDM2, SOX4, AURKA	1191	62	16792	2.72885	1	0.175798	7.00389
GOTERM_BP_DIRECT	GO:0016525~negative regulation of angiogenesis	12	0.894855	0.00386553	COL4A3, COL4A2, CCL2, CCR2, RGCC, DCN, SPARC, THBS1, TCF4, STAT1, THBS2, CXCL10	1191	62	16792	2.72885	1	0.175798	7.00389
GOTERM_CC_DIRECT	GO:0031093~platelet alpha granule lumen	11	0.820283	0.00397536	VWF, PDGFA, SPARC, HGF, THBS1, TGFB1, GAS6, PLG, SRGN, TGFB2, TIMP1	1258	55	18224	2.8973	0.895911	0.0803817	5.67168
GOTERM_MF_DIRECT	GO:0048020~CCR chemokine receptor binding	7	0.521999	0.00398553	CCL14, CCL20, CCL21, CCL8, CCL19, XCL1, CCL18	1172	23	16881	4.3837	0.993341	0.144971	6.2859
GOTERM_CC_DIRECT	GO:0072562~blood microparticle	21	1.566	0.00399277	IGHG1, TF, PZP, IGKV1-17, C1R, C1S, IGHM, PLG, HPR, TGFB1, CFHR3, HSPA2, GSN, ITIH1, BCHE, FCN2, APOA5, MSN, IGKC, IGLL5, IGLC1	1258	152	18224	2.00142	0.896939	0.0779524	5.69585
GOTERM_BP_DIRECT	GO:0030217~T cell differentiation	8	0.59657	0.00423334	PTPRC, CD3D, GPR18, LCK, SOX4, PTPN22, IL7R, RUNX2	1191	30	16792	3.75975	1	0.188904	7.64558
GOTERM_MF_DIRECT	GO:0042802~identical protein binding	72	5.36913	0.00435875	S100A4, LDHB, CLDN7, IER5, PRC1, SYT9, MCM10, BBOX1, ROBO1, FAS, NQO1, THRSP, SH3GL3, GBP5, CRYAB, VIL1, LYZ, VPS41, RB1, PFKM, STK4, SLIT2, MCM6, UHRF1, MAD2L1, JUN, LCK, COL1A2, MDM2, CTSC, COL1A1, GBP1, BCAT1, CCL3, SORD, HSD17B14, VIM, FHL2, CLDN10, CLDN11, C1S, CCL4, CD74, CLDN14, PBLD, BCHE, BCL2, PYCARD, MNS1, MYOM1, THBS1, TCF4, TRAF5, CNKSR2, CAP2, NDC80, BIRC5, DPYSL2, HGF, STAT1, MID1,…	1172	749	16881	1.38459	0.99584	0.153061	6.85514
GOTERM_BP_DIRECT	GO:0009611~response to wounding	12	0.894855	0.00439023	VWF, LYVE1, CCL2, PDGFA, CTGF, TNC, CCR2, AURKA, MYC, TGFB1, FABP5, TGFB2	1191	63	16792	2.68554	1	0.193221	7.918
GOTERM_BP_DIRECT	GO:0046835~carbohydrate phosphorylation	7	0.521999	0.00443049	GALK1, GNPTAB, GCK, GNE, PFKFB3, HKDC1, PFKM	1191	23	16792	4.29102	1	0.19287	7.98779
GOTERM_BP_DIRECT	GO:0016337~single organismal cell-cell adhesion	16	1.19314	0.00490283	EMCN, PKHD1, CEP41, FBLIM1, SOX9, CTNNA3, THY1, COL14A1, ITGA6, CD44, SRPX2, KIRREL, FAT1, CD58, CD2, CD24	1191	101	16792	2.23352	1	0.209085	8.8028
GOTERM_BP_DIRECT	GO:0055114~oxidation-reduction process	60	4.47427	0.00493056	CYP3A4, C15ORF48, LDHB, ALDH1L1, CYP2C19, CYP2D6, PTGS1, DNAJC10, BBOX1, CYP3A43, GPX2, FAR1, MTHFD2, TP53I3, PTGIS, CYP7A1, CH25H, GPX3, MICAL1, LOXL4, GPX8, SCD5, SRD5A2, GPX7, NQO1, LOXL2, SARDH, LOXL1, ALDH6A1, CTBP2, DHRS9, CYP26A1, CYP1A2, MOXD1, DHRS2, AKR1B10, RRM2, CYBRD1, CYP2A6, CYP2A7, ME1, SORD, GLUD2, HSD17B14, IFI30, CYP2A13, FMO5, HAAO, GPD2, CYP2C9, MSRB3, BLVRA, CYP4A11, AKR1B1,…	1191	592	16792	1.42896	1	0.208108	8.85043
KEGG_PATHWAY	hsa00650:Butanoate metabolism	8	0.59657	0.00501539	ACSM2B, ACSM3, HMGCS2, ACADS, OXCT1, ACSM2A, AACS, ACSM5	568	27	6910	3.60459	0.750359	0.0349572	6.41822
GOTERM_BP_DIRECT	GO:0016477~cell migration	23	1.71514	0.00508927	CTHRC1, CDK1, FUT8, PODXL, RASGEF1A, PALLD, COL5A1, GAS6, TGFB1, EPHA3, TGFB2, NCK2, CTGF, ITGAV, FAT1, JAK1, ADAMTS12, JAK3, CD24, DEPDC1B, THBS1, BAMBI, ADAM9	1191	172	16792	1.88534	1	0.21201	9.1226
GOTERM_CC_DIRECT	GO:0048471~perinuclear region of cytoplasm	61	4.54884	0.00511361	S100A4, S100A6, YBX3, PTPN22, AURKA, CTGF, TMEM100, MSN, MX1, MYO6, STMN2, ACKR3, GPER1, MCM3, BICD1, MAD2L1, KRT18, TNFSF13B, DGAT2, PTGDS, CCR2, PLA2G2A, VAMP5, BUB1B, SORT1, MOSPD1, GBP4, GBP3, GBP2, PLA2G5, TF, CAV2, HMGB2, CCL2, PKHD1, KIAA0101, OAS2, KIRREL, FAT1, NDRG2, LAMB1, SNAP25, MT1G, EHD4, SPP1, CAPN6, RAB8B, MT1M, RASEF, CHI3L1, CENPF, ITGA2, CDC20, CDKN3, STAT1, ANXA4, ANXA2, CDKN…	1258	621	18224	1.42299	0.945632	0.0955364	7.23955
GOTERM_BP_DIRECT	GO:0042110~T cell activation	10	0.745712	0.005144	PIK3CG, CD48, ITK, NCK2, CD86, CD3G, CD8A, CD2, CLEC7A, ADA	1191	47	16792	2.9998	1	0.212016	9.21628
GOTERM_CC_DIRECT	GO:0042383~sarcolemma	14	1.044	0.00531311	SLC8A1, ANXA1, AQP1, SSPN, ANXA2, LAMA2, KRT19, ABCC9, ANK2, ANK3, COL6A3, SGCD, SGCB, DTNA	1258	85	18224	2.38601	0.951485	0.0959432	7.51183
GOTERM_BP_DIRECT	GO:0048535~lymph node development	6	0.447427	0.00534152	TNFRSF11A, CXCL13, RORC, IL15, IL7R, TGFB1	1191	17	16792	4.97614	1	0.217175	9.55362
GOTERM_BP_DIRECT	GO:0032233~positive regulation of actin filament bundle assembly	5	0.372856	0.00553046	PFN2, ID1, SWAP70, VIL1, SYNPO2	1191	11	16792	6.40867	1	0.221892	9.87518
GOTERM_BP_DIRECT	GO:0001775~cell activation	5	0.372856	0.00553046	CCL3, PDGFA, PDGFRA, CD24, TIMP1	1191	11	16792	6.40867	1	0.221892	9.87518
GOTERM_BP_DIRECT	GO:0014068~positive regulation of phosphatidylinositol 3-kinase signaling	12	0.894855	0.00560866	PDGFA, IL18, F2RL1, PDGFRA, PDGFD, SEMA4D, DCN, HGF, GPER1, CCL5, SOX9, TGFB2	1191	65	16792	2.60291	1	0.222619	10.008
GOTERM_BP_DIRECT	GO:0030335~positive regulation of cell migration	24	1.78971	0.00562671	CCL3, PDGFA, PODXL, F2RL1, VIL1, LEF1, HGF, GPER1, MCAM, CCL5, TGFB1, ITGA6, ITGAV, ADRA2A, PDGFRA, SEMA3C, COL1A1, SEMA4D, PDGFD, THBS1, LAMB1, GPNMB, CYR61, ATP8A1	1191	184	16792	1.83901	1	0.221245	10.0386
GOTERM_BP_DIRECT	GO:0007062~sister chromatid cohesion	16	1.19314	0.00589769	ITGB3BP, CENPM, NUF2, CENPF, NDC80, BIRC5, CDC20, CENPK, CENPH, SPC25, MAD2L1, CENPA, ZWINT, BUB1, BUB1B, CENPU	1191	103	16792	2.19015	1	0.228555	10.4971
GOTERM_BP_DIRECT	GO:0038063~collagen-activated tyrosine kinase receptor signaling pathway	4	0.298285	0.00603434	COL4A3, COL4A2, COL4A1, COL4A5	1191	6	16792	9.39938	1	0.231155	10.7275
GOTERM_BP_DIRECT	GO:0032873~negative regulation of stress-activated MAPK cascade	4	0.298285	0.00603434	FOXM1, PBK, MYC, GSTP1	1191	6	16792	9.39938	1	0.231155	10.7275
GOTERM_BP_DIRECT	GO:0046483~heterocycle metabolic process	4	0.298285	0.00603434	CYP3A4, CYP2C19, CYP2D6, CYP1A2	1191	6	16792	9.39938	1	0.231155	10.7275
GOTERM_MF_DIRECT	GO:0048306~calcium-dependent protein binding	11	0.820283	0.00611217	S100A4, S100A6, STMN2, FCN2, ANXA1, S100A11, SNAP25, ANXA4, ANXA3, ANXA2, CLEC4M	1172	58	16881	2.73171	0.999545	0.202524	9.48633
GOTERM_BP_DIRECT	GO:0043086~negative regulation of catalytic activity	13	0.969426	0.00620724	PHACTR2, IL7, ARPP19, SCG5, ACACB, ANXA5, NQO1, ANXA4, ANXA3, ANXA2, FNIP2, TIMP1, ANXA2P2	1191	75	16792	2.44384	1	0.234896	11.0182
GOTERM_MF_DIRECT	GO:0005520~insulin-like growth factor binding	6	0.447427	0.00636924	WISP1, CTGF, IGFBP7, IGFALS, CRIM1, CYR61	1172	18	16881	4.80119	0.999671	0.204762	9.86619
GOTERM_BP_DIRECT	GO:0051726~regulation of cell cycle	18	1.34228	0.00652646	PTPRC, TRNP1, DTL, FIGNL1, FOXM1, PRR11, KIAA0101, CENPF, BEX2, RB1, ARNTL, CCNG2, CCNB1, CCNE2, CCNB2, JUN, IRF1, GRK5	1191	124	16792	2.04664	1	0.243307	11.5525
KEGG_PATHWAY	hsa05205:Proteoglycans in cancer	28	2.08799	0.00661288	CAV2, LUM, DCN, MMP2, MIR21, TGFB1, TGFB2, GPC3, CD44, ANK2, HPSE, ANK3, ITGAV, FAS, MSN, THBS1, PIK3R3, MYC, PIK3CG, FZD1, ITGA2, HGF, FZD2, FZD7, FZD6, CDKN1A, CCND1, MDM2	568	200	6910	1.70317	0.839781	0.0447483	8.38118
GOTERM_MF_DIRECT	GO:0005215~transporter activity	25	1.86428	0.00687853	RBP5, FXYD2, RBP4, SLC13A5, RBP1, SLC16A10, SLC37A4, AQP4, ABCB1, AQP1, SEC14L2, ABCG2, ATP6V1C1, ABCC9, PTGDS, TAP2, TAP1, FABP4, ABCC1, SLCO3A1, SLC51B, SLC51A, FABP5, KIF20A, FLVCR1	1172	202	16881	1.78262	0.999827	0.213861	10.6143
GOTERM_BP_DIRECT	GO:0070372~regulation of ERK1 and ERK2 cascade	7	0.521999	0.00688346	FGFR2, PKHD1, RASGRP1, EPHB1, GSTP1, SYK, CYR61	1191	25	16792	3.94774	1	0.252667	12.1465
GOTERM_BP_DIRECT	GO:0043491~protein kinase B signaling	8	0.59657	0.00737892	P2RY12, CCL3, CCL2, TMEM100, CCL5, SOX9, TGFB1, GAS6	1191	33	16792	3.41796	1	0.266027	12.9646
GOTERM_BP_DIRECT	GO:0010718~positive regulation of epithelial to mesenchymal transition	8	0.59657	0.00737892	RGCC, EZH2, LEF1, COL1A1, BAMBI, WWTR1, TGFB1, TGFB2	1191	33	16792	3.41796	1	0.266027	12.9646
KEGG_PATHWAY	hsa03030:DNA replication	9	0.671141	0.00754369	RFC3, PCNA, MCM2, MCM3, RNASEH2A, MCM4, MCM5, FEN1, MCM6	568	36	6910	3.04137	0.876307	0.049697	9.50731
GOTERM_BP_DIRECT	GO:0006461~protein complex assembly	17	1.26771	0.00770887	PPP2R1B, CDK1, CD3G, VIL1, MITF, NCKAP1L, SOX9, CAPN3, CD74, CLDN14, SLC7A6, CCNB1, IL1RAP, MDM2, FAS, WIPF1, MDN1	1191	116	16792	2.06624	1	0.273916	13.5054
GOTERM_MF_DIRECT	GO:0019901~protein kinase binding	40	2.98285	0.00772553	CAV2, PRC1, CD8A, FOXM1, NBEA, AURKA, GPRC5B, CCNE2, VRK1, ANK2, CDKN2C, TRIM6, ADRA2A, STK39, SPRED1, MSN, CD24, SIK1, ERRFI1, CCNA2, SYK, KIF14, PTPRC, KIF11, SLC12A2, MSH2, TPX2, DPYSL2, RACGAP1, TRIM22, THY1, CCNB1, CCND1, CCND2, LCK, RGCC, CKS2, RHEB, AKAP7, KIF20A	1172	376	16881	1.5323	0.999941	0.231303	11.8456
GOTERM_BP_DIRECT	GO:0050921~positive regulation of chemotaxis	5	0.372856	0.00783519	CCL21, F2RL1, CCL19, THBS1, TGFB1	1191	12	16792	5.87462	1	0.275509	13.7116
GOTERM_BP_DIRECT	GO:0070989~oxidative demethylation	5	0.372856	0.00783519	CYP3A4, CYP3A5, CYP2C9, CYP2D6, CYP1A2	1191	12	16792	5.87462	1	0.275509	13.7116
GOTERM_CC_DIRECT	GO:0031528~microvillus membrane	6	0.447427	0.00796986	PROM1, ITGAV, PODXL, CDHR2, CDHR5, MSN	1258	19	18224	4.57468	0.98938	0.136372	11.0676
GOTERM_CC_DIRECT	GO:0051233~spindle midzone	6	0.447427	0.00796986	KIF14, CDC6, BUB1B, AURKA, GEM, RACGAP1	1258	19	18224	4.57468	0.98938	0.136372	11.0676
GOTERM_BP_DIRECT	GO:0043406~positive regulation of MAP kinase activity	11	0.820283	0.00799806	AJUBA, PIK3CG, PDGFA, RASGRP1, EZH2, ADRA2A, KITLG, PDGFD, CD24, HTR2B, TGFB1	1191	59	16792	2.62864	1	0.278149	13.9768
GOTERM_MF_DIRECT	GO:0001965~G-protein alpha-subunit binding	6	0.447427	0.00815811	RGS10, RGS1, RGS4, F2RL1, LPAR1, HTR2B	1172	19	16881	4.5485	0.999966	0.237031	12.4683
GOTERM_BP_DIRECT	GO:0072661~protein targeting to plasma membrane	7	0.521999	0.00842232	TESC, ANK2, ANK3, NFASC, SPTBN1, GAS6, ANXA2	1191	26	16792	3.79591	1	0.288316	14.6639
GOTERM_BP_DIRECT	GO:0007202~activation of phospholipase C activity	7	0.521999	0.00842232	EDNRA, ITK, C5AR1, AVPR1A, ADRA1A, LPAR1, HTR2B	1191	26	16792	3.79591	1	0.288316	14.6639
GOTERM_BP_DIRECT	GO:0008652~cellular amino acid biosynthetic process	7	0.521999	0.00842232	GLS2, BCAT1, FOLH1, GLS, ASPG, ASNS, CBS	1191	26	16792	3.79591	1	0.288316	14.6639
GOTERM_BP_DIRECT	GO:0045599~negative regulation of fat cell differentiation	9	0.671141	0.0084317	SORT1, ID4, ZFPM2, JAG1, ARNTL, BBS12, GPER1, WWTR1, TGFB1	1191	42	16792	3.02123	1	0.286361	14.6791
GOTERM_BP_DIRECT	GO:0001837~epithelial to mesenchymal transition	8	0.59657	0.00873614	FGFR2, S100A4, LEF1, HGF, LOXL2, SOX9, TGFB1, TGFB2	1191	34	16792	3.31743	1	0.292795	15.1689
GOTERM_BP_DIRECT	GO:0048260~positive regulation of receptor-mediated endocytosis	6	0.447427	0.00891718	TF, CCL21, APOA5, CCL19, BICD1, ANXA2	1191	19	16792	4.45234	1	0.295636	15.4589
KEGG_PATHWAY	hsa04964:Proximal tubule bicarbonate reclamation	7	0.521999	0.00895345	GLS2, FXYD2, ATP1B3, GLUD2, GLS, AQP1, PCK1	568	23	6910	3.70254	0.916448	0.0573893	11.1886
GOTERM_MF_DIRECT	GO:0005496~steroid binding	7	0.521999	0.00921654	CYP3A4, AR, ESRRG, PAQR8, SULT1E1, GPER1, PAQR5	1172	27	16881	3.73426	0.999991	0.257668	13.9745
KEGG_PATHWAY	hsa04611:Platelet activation	20	1.49142	0.0093358	PIK3CG, ADCY1, ADCY7, COL3A1, PTGS1, ITGA2, COL5A2, COL5A1, P2RY12, VWF, PLA2G4A, RASGRP1, COL1A2, GUCY1A2, GUCY1A3, FCGR2A, COL1A1, PIK3R3, SYK, LCP2	568	130	6910	1.87161	0.924889	0.0584278	11.6396
GOTERM_MF_DIRECT	GO:0015645~fatty acid ligase activity	4	0.298285	0.00942842	ACSM2B, ACSM3, ACSM2A, ACSM5	1172	7	16881	8.23062	0.999993	0.25712	14.2731
GOTERM_MF_DIRECT	GO:0004321~fatty-acyl-CoA synthase activity	4	0.298285	0.00942842	ACSM2B, ACSM3, ACSM2A, ACSM5	1172	7	16881	8.23062	0.999993	0.25712	14.2731
GOTERM_CC_DIRECT	GO:0005876~spindle microtubule	9	0.671141	0.0095784	CAPN6, CDK1, KIF4A, KIF11, PRC1, NUSAP1, BIRC5, AURKA, BIRC3	1258	44	18224	2.96314	0.995775	0.15704	13.1581
GOTERM_CC_DIRECT	GO:0016328~lateral plasma membrane	10	0.745712	0.00969011	EPCAM, CLDN7, TACSTD2, ANK3, ANXA1, IQGAP3, GJA1, AKAP7, MTCL1, PTPRO	1258	53	18224	2.7333	0.996037	0.154309	13.3016
GOTERM_BP_DIRECT	GO:0007517~muscle organ development	14	1.044	0.00972284	AEBP1, CRYAB, CENPF, CAPN3, CXCL10, LAMA2, NEB, TAGLN, COL6A3, VAMP5, CACNA1H, SGCD, ETV1, SGCB	1191	89	16792	2.21783	1	0.315362	16.7381
GOTERM_BP_DIRECT	GO:0034080~CENP-A containing nucleosome assembly	9	0.671141	0.00973144	ITGB3BP, CENPM, CENPA, OIP5, CENPW, CENPU, MIS18BP1, CENPK, CENPH	1191	43	16792	2.95097	1	0.313292	16.7516
GOTERM_BP_DIRECT	GO:0030155~regulation of cell adhesion	9	0.671141	0.00973144	LAMA2, KIF14, EMCN, LAMA3, CYTIP, IL18, CXCL8, SOX9, PRKX	1191	43	16792	2.95097	1	0.313292	16.7516
GOTERM_MF_DIRECT	GO:0050839~cell adhesion molecule binding	11	0.820283	0.00981091	CLDN7, LILRB2, CRTAM, CPE, NRXN3, SELL, CDHR2, CDHR5, MSN, ITGA4, CD200	1172	62	16881	2.55547	0.999996	0.260508	14.8096
GOTERM_BP_DIRECT	GO:2000503~positive regulation of natural killer cell chemotaxis	4	0.298285	0.0100064	CCL3, CCL5, XCL1, CCL4	1191	7	16792	8.05662	1	0.318275	17.184
KEGG_PATHWAY	hsa04380:Osteoclast differentiation	20	1.49142	0.0101127	PIK3CG, SOCS3, MITF, FHL2, ACP5, STAT1, TGFB1, TGFB2, LILRB2, CTSK, SIRPG, TNFRSF11A, FCGR1A, JUN, LCK, JAK1, FCGR2A, PIK3R3, SYK, LCP2	568	131	6910	1.85733	0.939513	0.0617674	12.5494
GOTERM_BP_DIRECT	GO:0006633~fatty acid biosynthetic process	10	0.745712	0.0101205	ACSM2B, ACSM3, CH25H, ACSM2A, ELOVL7, PRKAA2, SCD5, ACACB, LIPC, ACSM5	1191	52	16792	2.71136	1	0.318972	17.3628
GOTERM_BP_DIRECT	GO:0035987~endodermal cell differentiation	7	0.521999	0.010193	COL4A2, LAMA3, ITGAV, COL12A1, ITGA4, LAMB1, MMP2	1191	27	16792	3.65532	1	0.318584	17.4762
GOTERM_BP_DIRECT	GO:0006865~amino acid transport	8	0.59657	0.0102678	SLC38A4, SLC16A10, SLC7A1, SLC6A6, SLC38A1, SLC3A1, MYC, SLC7A6	1191	35	16792	3.22265	1	0.318261	17.593
GOTERM_BP_DIRECT	GO:0006911~phagocytosis, engulfment	8	0.59657	0.0102678	IGHG1, GULP1, GSN, FCGR1A, IGKC, IGHM, IGLL5, IGLC1	1191	35	16792	3.22265	1	0.318261	17.593
GOTERM_CC_DIRECT	GO:0016324~apical plasma membrane	32	2.38628	0.0106368	TF, OSMR, PKHD1, ANO1, GJA1, JAG1, AMN, AQP1, EPCAM, ANK2, ATP8B1, SLC4A7, MTCL1, STK39, MSN, SLC12A2, PODXL, CDHR2, ANXA1, CFTR, ABCB1, CDHR5, IL6R, PFKM, PTPRO, THY1, FZD6, PROM1, CYP4A11, ANXA13, AKAP7, STC1	1258	291	18224	1.59302	0.997698	0.163601	14.5086
GOTERM_BP_DIRECT	GO:2000484~positive regulation of interleukin-8 secretion	5	0.372856	0.010691	CD58, FCN1, F2RL1, CD2, PYCARD	1191	13	16792	5.42272	1	0.326725	18.251
GOTERM_BP_DIRECT	GO:0033630~positive regulation of cell adhesion mediated by integrin	5	0.372856	0.010691	CCL21, NCKAP1L, TGFB2, SYK, ADAM9	1191	13	16792	5.42272	1	0.326725	18.251
GOTERM_BP_DIRECT	GO:0009615~response to virus	16	1.19314	0.0107234	CCL19, CCL8, IFI44, OAS2, CCL5, TRIM22, CCL4, TLR8, ISG20, IFIT3, IRAK3, CXCR4, DDX60, STMN1, MX1, XCL1	1191	110	16792	2.05077	1	0.325289	18.3012
GOTERM_BP_DIRECT	GO:0071260~cellular response to mechanical stimulus	12	0.894855	0.0109073	PTGER4, IRF1, MMP7, GJA1, ITGA2, COL1A1, FAS, SOX9, AQP1, CASP1, TGFB1, TLR8	1191	71	16792	2.38294	1	0.327613	18.5855
KEGG_PATHWAY	hsa05210:Colorectal cancer	12	0.894855	0.011128	PIK3CG, CCND1, MSH2, JUN, BAX, BCL2, LEF1, BIRC5, PIK3R3, MYC, TGFB1, TGFB2	568	62	6910	2.35461	0.954431	0.0663318	13.7253
GOTERM_BP_DIRECT	GO:0043434~response to peptide hormone	9	0.671141	0.0111743	BTG2, CTGF, ANXA1, GJA1, COL1A1, SRD5A2, SPARC, STAT1, TIMP1	1191	44	16792	2.8839	1	0.331911	18.9966
GOTERM_BP_DIRECT	GO:0048545~response to steroid hormone	6	0.447427	0.0112086	HMGB2, MDM2, PAQR8, SRD5A2, SPP1, PAQR5	1191	20	16792	4.22972	1	0.330525	19.0493
GOTERM_BP_DIRECT	GO:0032355~response to estradiol	14	1.044	0.011643	CRYAB, EZH2, ANXA1, CYP1A2, TGFB1, IFI27, CCND1, CTGF, PCNA, WFDC1, COL1A1, NQO1, MYC, GSTP1	1191	91	16792	2.16909	1	0.338677	19.7134
KEGG_PATHWAY	hsa04620:Toll-like receptor signaling pathway	17	1.26771	0.0121454	PIK3CG, CCL3, LY96, TLR1, CXCL9, CXCL8, CXCL11, STAT1, CCL5, CCL4, TLR8, CXCL10, CTSK, CD86, JUN, PIK3R3, SPP1	568	106	6910	1.95107	0.965701	0.0706951	14.8891
GOTERM_BP_DIRECT	GO:0007179~transforming growth factor beta receptor signaling pathway	14	1.044	0.0127069	SMAD9, CCL2, FUT8, LTBP2, COL3A1, TGFB1, TGFB2, CGN, ID1, JUN, COL1A2, BAMBI, GDF15, ADAM9	1191	92	16792	2.14551	1	0.361033	21.3184
GOTERM_MF_DIRECT	GO:0004602~glutathione peroxidase activity	6	0.447427	0.0127215	GPX2, ALOX5AP, GPX3, GPX8, GPX7, GSTP1	1172	21	16881	4.11531	1	0.317894	18.7905
KEGG_PATHWAY	hsa04068:FoxO signaling pathway	20	1.49142	0.0127583	PIK3CG, SGK1, HOMER1, IL7R, CCNG2, STK4, HOMER2, TGFB1, PCK1, TGFB2, CCNB1, CCND1, G6PC, CDKN1A, CCNB2, PLK2, CCND2, MDM2, PRKAA2, PIK3R3	568	134	6910	1.81575	0.971101	0.0726306	15.5832
GOTERM_CC_DIRECT	GO:0031091~platelet alpha granule	5	0.372856	0.0128917	VWF, SERPINE2, SPARC, THBS1, THBS2	1258	14	18224	5.17375	0.99937	0.189881	17.3207
GOTERM_MF_DIRECT	GO:0023029~MHC class Ib protein binding	3	0.223714	0.0137583	LILRB2, TAP2, TAP1	1172	3	16881	14.4036	1	0.332581	20.1658
GOTERM_BP_DIRECT	GO:0002576~platelet degranulation	15	1.11857	0.0137754	TF, PHACTR2, PDGFA, SPARC, HGF, PCDH7, PLG, GAS6, TGFB1, TIMP1, TGFB2, VWF, ABCC4, THBS1, SRGN	1191	103	16792	2.05326	1	0.382416	22.8996
GOTERM_BP_DIRECT	GO:2001241~positive regulation of extrinsic apoptotic signaling pathway in absence of ligand	5	0.372856	0.0141411	PPP2R1B, SRPX, BAX, FAS, TGFB2	1191	14	16792	5.03538	1	0.387923	23.4338
GOTERM_MF_DIRECT	GO:0042379~chemokine receptor binding	4	0.298285	0.014314	CCL21, CCL19, CCL5, XCL1	1172	8	16881	7.20179	1	0.337162	20.894
GOTERM_MF_DIRECT	GO:0003996~acyl-CoA ligase activity	4	0.298285	0.014314	ACSM2B, ACSM3, ACSM2A, ACSM5	1172	8	16881	7.20179	1	0.337162	20.894
GOTERM_MF_DIRECT	GO:0005501~retinoid binding	4	0.298285	0.014314	RBP5, RBP4, PTGDS, RBP1	1172	8	16881	7.20179	1	0.337162	20.894
GOTERM_BP_DIRECT	GO:0032787~monocarboxylic acid metabolic process	3	0.223714	0.0143445	GLYAT, CYP2C9, CYP1A2	1191	3	16792	14.0991	1	0.389874	23.7294
GOTERM_BP_DIRECT	GO:0032252~secretory granule localization	3	0.223714	0.0143445	PIK3CG, MYO5A, RASGRP1	1191	3	16792	14.0991	1	0.389874	23.7294
GOTERM_BP_DIRECT	GO:0009822~alkaloid catabolic process	3	0.223714	0.0143445	CYP3A4, CYP3A5, CYP2D6	1191	3	16792	14.0991	1	0.389874	23.7294
GOTERM_MF_DIRECT	GO:0015171~amino acid transmembrane transporter activity	9	0.671141	0.0146135	SLC38A4, SLC16A10, SLC7A1, SLC6A6, SLC38A6, SLC6A16, SLC38A1, SLC3A1, SLC7A6	1172	47	16881	2.75813	1	0.336723	21.2839
GOTERM_BP_DIRECT	GO:0001649~osteoblast differentiation	15	1.11857	0.0149145	CCL3, IFT80, FIGNL1, TNC, GJA1, LEF1, FHL2, WWTR1, VCAN, RPS11, COL1A1, GPNMB, RUNX2, SPP1, CYR61	1191	104	16792	2.03352	1	0.399418	24.5521
GOTERM_BP_DIRECT	GO:0010818~T cell chemotaxis	4	0.298285	0.0151741	PIK3CG, CCL3, CXCL11, CXCL10	1191	8	16792	7.04954	1	0.402365	24.924
GOTERM_BP_DIRECT	GO:0071493~cellular response to UV-B	4	0.298285	0.0151741	CDKN1A, CRIP1, MME, MFAP4	1191	8	16792	7.04954	1	0.402365	24.924
KEGG_PATHWAY	hsa00830:Retinol metabolism	12	0.894855	0.0156869	CYP3A4, CYP3A5, CYP4A11, CYP3A7, CYP2C9, ADH4, AOX1, DHRS9, CYP26A1, CYP2A6, CYP1A2, UGT2A3	568	65	6910	2.24594	0.987271	0.0869043	18.8278
GOTERM_CC_DIRECT	GO:0030018~Z disc	16	1.19314	0.0156995	SLC8A1, CRYAB, PDLIM3, FHL2, SYNPO2, PALLD, NEXN, HOMER1, CAPN3, FKBP1B, KRT19, NEB, ANK2, ANK3, KCNN2, ADRA1A	1258	118	18224	1.96427	0.999875	0.22094	20.7018
GOTERM_BP_DIRECT	GO:0032720~negative regulation of tumor necrosis factor production	8	0.59657	0.0160277	HAVCR2, IRAK3, GPR18, ACP5, PTPN22, GPNMB, GAS6, GSTP1	1191	38	16792	2.96823	1	0.417126	26.1346
GOTERM_MF_DIRECT	GO:0004867~serine-type endopeptidase inhibitor activity	14	1.044	0.0163589	PZP, SPINT1, PAPLN, SERPINB9, SERPINE2, ITIH1, SPINT2, SERPINB8, COL6A3, SERPINB1, ITIH5, WFDC1, TFPI2, CRIM1	1172	97	16881	2.07887	1	0.362375	23.5202
GOTERM_BP_DIRECT	GO:0031100~organ regeneration	9	0.671141	0.0164486	CDK1, CDKN1A, CCL2, C5AR1, HGF, CCNA2, GAS6, GSTP1, ANXA3	1191	47	16792	2.69982	1	0.422963	26.7248
GOTERM_CC_DIRECT	GO:0005737~cytoplasm	395	29.4556	0.0165111	CTHRC1, LDHB, PTGS1, ISG20, CDCA7, PPP1R1A, FAS, CCNA2, SYK, PIK3CG, SH3GL3, CRYAB, LRRC1, SPAG1, DCDC2, DCDC1, CTNNA3, TAGLN, ASCC3, ZWINT, RPS11, TPPP2, KIF4A, PLCXD3, RTP4, DBNDD2, NAGS, TPGS2, PFN2, SPATS2, FAIM, CDC42EP3, GAS6, FNIP2, APOL3, RGS4, MAP2, PCNA, SMURF2, GAS2L3, LIMA1, ELF3, LXN, EZH2, YBX3, GPR88, MICAL1, SIK1, ERRFI1, CDC7, CDC6, AR, CFTR, TTF2, EPB41L2, SERPINB9, NCK2, EPB41L…	1258	5222	18224	1.09578	0.999922	0.225535	21.6549
KEGG_PATHWAY	hsa05219:Bladder cancer	9	0.671141	0.0165951	CDKN1A, E2F3, CCND1, CXCL8, MDM2, RB1, THBS1, MMP2, MYC	568	41	6910	2.67047	0.990134	0.0899526	19.8104
GOTERM_BP_DIRECT	GO:0001501~skeletal system development	18	1.34228	0.0168785	AEBP1, HAPLN4, COL3A1, FBN1, SOX4, FRZB, SOX9, COL5A2, PRELP, TGFB2, CDKN1C, RASSF2, COL1A2, COL12A1, VCAN, COL1A1, BMP5, CDH11	1191	137	16792	1.85243	1	0.428829	27.3229
GOTERM_BP_DIRECT	GO:0010165~response to X-ray	6	0.447427	0.0169265	CDKN1A, CCND1, THBD, MSH2, ANXA1, IKBIP	1191	22	16792	3.8452	1	0.427334	27.3895
GOTERM_BP_DIRECT	GO:0034113~heterotypic cell-cell adhesion	6	0.447427	0.0169265	LILRB2, ITGAV, CD58, NFASC, CD2, ITGA4	1191	22	16792	3.8452	1	0.427334	27.3895
GOTERM_BP_DIRECT	GO:0071345~cellular response to cytokine stimulus	6	0.447427	0.0169265	CD86, CXCR4, MME, LEF1, DPYSL3, ITGA4	1191	22	16792	3.8452	1	0.427334	27.3895
GOTERM_BP_DIRECT	GO:0071773~cellular response to BMP stimulus	7	0.521999	0.0170639	SMAD9, SPINT2, HEYL, SPINT1, TMEM100, ADAMTS12, RUNX2	1191	30	16792	3.28978	1	0.427545	27.5795
GOTERM_BP_DIRECT	GO:0060325~face morphogenesis	7	0.521999	0.0170639	CRISPLD2, ARID5B, LEF1, COL1A1, MMP2, TGFB1, TGFB2	1191	30	16792	3.28978	1	0.427545	27.5795
GOTERM_CC_DIRECT	GO:0031234~extrinsic component of cytoplasmic side of plasma membrane	11	0.820283	0.017644	ITK, CAV2, S100A6, RGS1, LCK, JAK1, JAK3, RACGAP1, ERRFI1, SYK, DTNA	1258	68	18224	2.3434	0.999959	0.233627	22.9675
GOTERM_BP_DIRECT	GO:0070301~cellular response to hydrogen peroxide	10	0.745712	0.0180642	CDK1, IL18BP, AKR1B1, EZH2, PCNA, ANXA1, MDM2, PDGFD, AQP1, ECT2	1191	57	16792	2.47352	1	0.443699	28.9488
GOTERM_BP_DIRECT	GO:0002437~inflammatory response to antigenic stimulus	5	0.372856	0.0182217	HMGB2, HLA-DRB1, CYSLTR1, RASGRP1, PNMA1	1191	15	16792	4.69969	1	0.44415	29.1622
GOTERM_BP_DIRECT	GO:0033627~cell adhesion mediated by integrin	5	0.372856	0.0182217	ITGA6, ITGAV, FBN1, ITGA2, ADAM9	1191	15	16792	4.69969	1	0.44415	29.1622
GOTERM_MF_DIRECT	GO:0003779~actin binding	30	2.23714	0.0183083	S100A4, MYO5A, GAS2L3, ENAH, ANLN, TPM2, TPM1, CXCR4, GSN, MICAL1, MSN, WIPF1, FMNL2, PHACTR2, MYO6, CAP2, SYNPO2, PALLD, COTL1, HOMER2, EPB41L2, EPB41L3, NEB, CCR5, TAGLN, CGN, SPTBN1, OPHN1, DBN1, GBP1	1172	278	16881	1.55434	1	0.389454	25.9473
GOTERM_CC_DIRECT	GO:0031430~M band	6	0.447427	0.0183441	ANK2, CRYAB, FHL2, SMPX, SPTBN1, MYOM1	1258	23	18224	3.77908	0.999973	0.236351	23.7683
KEGG_PATHWAY	hsa05414:Dilated cardiomyopathy	14	1.044	0.0185709	ADCY1, CACNA2D1, ADCY7, ITGA2, ITGA4, TPM2, TPM1, TGFB1, TGFB2, ITGA6, ITGB8, ITGAV, SGCD, SGCB	568	84	6910	2.02758	0.994337	0.0983017	21.9101
GOTERM_BP_DIRECT	GO:0045892~negative regulation of transcription, DNA-templated	49	3.65399	0.0189366	ZBTB33, ELF3, EZH2, TGFB1, ZGPAT, TRIM6, ATP8B1, BHLHE41, LOXL2, CTBP2, ARID5B, MLXIPL, LEF1, ARNTL, IFI16, RB1, DEPDC1, JUN, MDM2, ZFPM2, HMGB2, GLIS2, FOXM1, FHL2, ELK3, SOX9, GREM1, DNMT3L, RUNX2, IKZF1, FZD1, CENPF, BIRC5, CAPN3, GAS6, CDKN1C, ATF5, DKK3, NR1I3, NR1I2, PRICKLE1, ID1, HEYL, IRF1, PSPC1, FABP4, SMURF2, ID4, XCL1	1191	499	16792	1.38448	1	0.454504	30.123
GOTERM_BP_DIRECT	GO:0032869~cellular response to insulin stimulus	12	0.894855	0.0193865	MYO5A, RAB31, CCL2, GCK, UCP2, PKLR, RHOQ, STAT1, ERRFI1, MYC, GSTP1, PCK1	1191	77	16792	2.19726	1	0.459956	30.7214
GOTERM_BP_DIRECT	GO:0071479~cellular response to ionizing radiation	7	0.521999	0.0199257	CDKN1A, RAD51AP1, FIGNL1, RHNO1, IFI16, ECT2, TGFB1	1191	31	16792	3.18366	1	0.466799	31.4321
GOTERM_BP_DIRECT	GO:0010332~response to gamma radiation	7	0.521999	0.0199257	PTPRC, CCL2, FANCD2, BAX, BCL2, MYC, CXCL10	1191	31	16792	3.18366	1	0.466799	31.4321
GOTERM_BP_DIRECT	GO:0032967~positive regulation of collagen biosynthetic process	6	0.447427	0.0203977	UTS2, CCL2, CTGF, RGCC, ITGA2, TGFB1	1191	23	16792	3.67802	1	0.472342	32.0485
GOTERM_BP_DIRECT	GO:0000083~regulation of transcription involved in G1/S transition of mitotic cell cycle	6	0.447427	0.0203977	CDK1, CDC6, TYMS, RRM2, PCNA, RB1	1191	23	16792	3.67802	1	0.472342	32.0485
GOTERM_BP_DIRECT	GO:0008360~regulation of cell shape	18	1.34228	0.0204933	CDC7, CCL3, CCL2, VIL1, ANXA1, RHOQ, FBLIM1, ARHGAP18, LPAR1, TPM1, EPB41L3, VRK1, WIPF3, WIPF1, MSN, SEMA4D, BAMBI, CDC42EP3	1191	140	16792	1.81274	1	0.471535	32.1727
GOTERM_BP_DIRECT	GO:0007596~blood coagulation	22	1.64057	0.0207005	F11, MAFF, F2RL1, ITGA2, DOCK8, ANXA5, PLG, P2RX5, P2RY12, VWF, ANXA8, THBD, SERPINE2, PROCR, COL1A2, IRF1, ZFPM2, COL1A1, PDGFD, ENTPD1, TFPI2, DOCK11	1191	184	16792	1.68576	1	0.472581	32.4413
GOTERM_BP_DIRECT	GO:0045071~negative regulation of viral genome replication	8	0.59657	0.0209502	RNASEL, ISG15, TRIM6, APOBEC3G, IFI16, CCL5, MX1, ISG20	1191	40	16792	2.81982	1	0.474303	32.7635
GOTERM_BP_DIRECT	GO:0032835~glomerulus development	4	0.298285	0.021577	BCL2, HEYL, WWTR1, PTPRO	1191	9	16792	6.26626	1	0.482051	33.5659
GOTERM_BP_DIRECT	GO:0043589~skin morphogenesis	4	0.298285	0.021577	COL1A2, ITGA2, COL1A1, ERRFI1	1191	9	16792	6.26626	1	0.482051	33.5659
GOTERM_BP_DIRECT	GO:0007184~SMAD protein import into nucleus	4	0.298285	0.021577	JUN, SPTBN1, TGFB1, TGFB2	1191	9	16792	6.26626	1	0.482051	33.5659
GOTERM_BP_DIRECT	GO:0097267~omega-hydroxylase P450 pathway	4	0.298285	0.021577	CYP4A11, CYP2C19, CYP2C9, CYP1A2	1191	9	16792	6.26626	1	0.482051	33.5659
GOTERM_BP_DIRECT	GO:0006469~negative regulation of protein kinase activity	14	1.044	0.0223815	ASPN, PTPRC, FLRT2, TESC, DBNDD2, SOCS3, DCN, RB1, WWTR1, THY1, PPM1E, PPP1R1A, FABP4, GSTP1	1191	99	16792	1.99381	1	0.492358	34.5826
GOTERM_CC_DIRECT	GO:0000776~kinetochore	12	0.894855	0.0229034	MEAF6, MAD2L1, NEK2, ZWINT, RASSF2, BUB1, CENPF, TTK, CENPW, BUB1B, NDC80, CENPH	1258	81	18224	2.14615	0.999998	0.280365	28.7968
GOTERM_BP_DIRECT	GO:0090026~positive regulation of monocyte chemotaxis	5	0.372856	0.0229619	CCL2, CCR2, PLA2G7, CCL5, CXCL10	1191	16	16792	4.40596	1	0.498927	35.307
GOTERM_BP_DIRECT	GO:0031663~lipopolysaccharide-mediated signaling pathway	7	0.521999	0.0230968	CCL3, CCL2, LY96, IL18, PTPN22, CCL5, TGFB1	1191	32	16792	3.08417	1	0.498616	35.4743
KEGG_PATHWAY	hsa05410:Hypertrophic cardiomyopathy (HCM)	13	0.969426	0.0241985	CACNA2D1, ITGA6, ITGB8, ITGAV, SGCD, ITGA2, PRKAA2, ITGA4, TPM2, TPM1, TGFB1, TGFB2, SGCB	568	78	6910	2.02758	0.998842	0.124156	27.6154
GOTERM_MF_DIRECT	GO:0008307~structural constituent of muscle	8	0.59657	0.0242019	KRT19, NEB, PDLIM3, MYOM1, NEXN, TPM2, CAPN3, TPM1	1172	42	16881	2.74354	1	0.473004	32.853
GOTERM_BP_DIRECT	GO:0035264~multicellular organism growth	12	0.894855	0.0251089	CDKN1C, FGFR2, GPD2, ATF5, STIL, AR, G6PC, ARID5B, HEG1, ETNK2, WWTR1, FLVCR1	1191	80	16792	2.11486	1	0.525844	37.9209
GOTERM_BP_DIRECT	GO:0071300~cellular response to retinoic acid	11	0.820283	0.0251158	TESC, CCL2, TNC, COL1A1, YAP1, SOX9, AQP1, MYC, FZD7, EPHA3, PCK1	1191	70	16792	2.21557	1	0.523562	37.9292
GOTERM_MF_DIRECT	GO:0003823~antigen binding	14	1.044	0.0257163	IGHG1, MICB, IGLV1-44, IGKV1-17, ITGA4, IL7R, IGHM, TGFB1, CD48, FCN2, MR1, IGKC, IGLC1, IGLL5	1172	103	16881	1.95777	1	0.486892	34.5272
GOTERM_BP_DIRECT	GO:0042593~glucose homeostasis	14	1.044	0.025953	RBP4, FBN1, ACSM2A, SLC37A4, PDK4, MLXIPL, SOX4, PFKM, GPRC5B, PCK1, G6PC, GCK, ADRA2A, PRKAA2	1191	101	16792	1.95433	1	0.532964	38.9209
GOTERM_CC_DIRECT	GO:0071953~elastic fiber	3	0.223714	0.0259724	FBLN1, FBLN5, MFAP4	1258	4	18224	10.8649	1	0.305503	32.0056
GOTERM_CC_DIRECT	GO:0000942~condensed nuclear chromosome outer kinetochore	3	0.223714	0.0259724	CCNB1, BUB1, NDC80	1258	4	18224	10.8649	1	0.305503	32.0056
GOTERM_CC_DIRECT	GO:0031262~Ndc80 complex	3	0.223714	0.0259724	SPC25, NUF2, NDC80	1258	4	18224	10.8649	1	0.305503	32.0056
GOTERM_BP_DIRECT	GO:0042542~response to hydrogen peroxide	9	0.671141	0.0259947	SLC8A1, CRYAB, JUN, BCL2, COL1A1, STAT1, FKBP1B, ADA, ADAM9	1191	51	16792	2.48807	1	0.531181	38.97
GOTERM_BP_DIRECT	GO:0019722~calcium-mediated signaling	9	0.671141	0.0259947	CCL3, CCR5, CXCR4, AVPR1A, CXCL8, HTR2B, RCAN3, RCAN2, MCTP1	1191	51	16792	2.48807	1	0.531181	38.97
GOTERM_MF_DIRECT	GO:0034875~caffeine oxidase activity	3	0.223714	0.0262537	CYP3A4, CYP2C9, CYP1A2	1172	4	16881	10.8027	1	0.48715	35.1118
GOTERM_MF_DIRECT	GO:0046978~TAP1 binding	3	0.223714	0.0262537	TAP2, TAP1, HLA-F	1172	4	16881	10.8027	1	0.48715	35.1118
GOTERM_MF_DIRECT	GO:0019834~phospholipase A2 inhibitor activity	3	0.223714	0.0262537	ANXA1, ANXA3, ANXA2	1172	4	16881	10.8027	1	0.48715	35.1118
GOTERM_MF_DIRECT	GO:0034597~phosphatidylinositol-4,5-bisphosphate 4-phosphatase activity	3	0.223714	0.0262537	INPP4B, INPP4A, TMEM55A	1172	4	16881	10.8027	1	0.48715	35.1118
GOTERM_MF_DIRECT	GO:0043236~laminin binding	6	0.447427	0.0264126	ITGA6, LGALS3, ITGA2, CTSS, THBS1, ADAM9	1172	25	16881	3.45686	1	0.482474	35.2837
GOTERM_BP_DIRECT	GO:0071364~cellular response to epidermal growth factor stimulus	7	0.521999	0.0265897	ID1, VIL1, COL1A1, SOX9, ERRFI1, MYC, GSTP1	1191	33	16792	2.99071	1	0.536994	39.6651
GOTERM_BP_DIRECT	GO:0010634~positive regulation of epithelial cell migration	7	0.521999	0.0265897	ENPP2, JUN, VIL1, ITGA2, RAB25, SOX9, TGFB2	1191	33	16792	2.99071	1	0.536994	39.6651
GOTERM_BP_DIRECT	GO:0097191~extrinsic apoptotic signaling pathway	8	0.59657	0.0268346	KRT18, BAX, MLLT11, FAS, IL6R, TGFB1, CD27, TGFB2	1191	42	16792	2.68554	1	0.537969	39.949
GOTERM_BP_DIRECT	GO:0009725~response to hormone	8	0.59657	0.0268346	RERG, ME1, SORD, OXCT1, MMP19, FHL2, ADRA1A, TIMP1	1191	42	16792	2.68554	1	0.537969	39.949
GOTERM_BP_DIRECT	GO:0001933~negative regulation of protein phosphorylation	10	0.745712	0.0271033	CCNB1, FBLN1, KIRREL, DNAJC10, STK39, MICAL1, WWTR1, FAM129A, TGFB1, SLIT2	1191	61	16792	2.31132	1	0.539249	40.2592
GOTERM_BP_DIRECT	GO:0033634~positive regulation of cell-cell adhesion mediated by integrin	3	0.223714	0.0273441	CXCL13, PODXL, CCL5	1191	4	16792	10.5743	1	0.54014	40.5358
GOTERM_BP_DIRECT	GO:0006663~platelet activating factor biosynthetic process	3	0.223714	0.0273441	PLA2G4A, LPCAT2, PLA2G5	1191	4	16792	10.5743	1	0.54014	40.5358
GOTERM_BP_DIRECT	GO:2000048~negative regulation of cell-cell adhesion mediated by cadherin	3	0.223714	0.0273441	EPCAM, RGCC, PLG	1191	4	16792	10.5743	1	0.54014	40.5358
GOTERM_BP_DIRECT	GO:0003104~positive regulation of glomerular filtration	3	0.223714	0.0273441	F2RL1, GJA1, GAS6	1191	4	16792	10.5743	1	0.54014	40.5358
GOTERM_BP_DIRECT	GO:2000483~negative regulation of interleukin-8 secretion	3	0.223714	0.0273441	ANXA1, PTPN22, ANXA4	1191	4	16792	10.5743	1	0.54014	40.5358
GOTERM_BP_DIRECT	GO:1901203~positive regulation of extracellular matrix assembly	3	0.223714	0.0273441	RGCC, SOX9, TGFB1	1191	4	16792	10.5743	1	0.54014	40.5358
GOTERM_BP_DIRECT	GO:0051919~positive regulation of fibrinolysis	3	0.223714	0.0273441	F11, KLKB1, PLG	1191	4	16792	10.5743	1	0.54014	40.5358
GOTERM_BP_DIRECT	GO:0010574~regulation of vascular endothelial growth factor production	3	0.223714	0.0273441	CCL2, CCR2, NDRG2	1191	4	16792	10.5743	1	0.54014	40.5358
KEGG_PATHWAY	hsa00591:Linoleic acid metabolism	7	0.521999	0.02772	CYP3A4, PLA2G4A, CYP2C19, CYP2C9, PLA2G2A, CYP1A2, PLA2G5	568	29	6910	2.9365	0.999573	0.138609	30.987
GOTERM_BP_DIRECT	GO:0071310~cellular response to organic substance	5	0.372856	0.0283836	EGR2, BCL2, IQGAP3, CUX2, CASP1	1191	17	16792	4.14679	1	0.5514	41.716
GOTERM_BP_DIRECT	GO:0006508~proteolysis	48	3.57942	0.0286189	IGHG1, ERMP1, IGLV1-44, CNDP1, IGKV1-17, OTUD6B, MMP7, MME, C1R, C1S, MMP2, LPA, PAPPA, FCN2, KLKB1, FCN1, STAMBPL1, CPA3, FGL2, CFI, IGKC, CASP1, LONRF2, F11, AGA, CAPN6, ADAM28, AGBL2, CAPN5, MMP19, SCRN1, PAPLN, HGF, CTSS, CAPN2, CAPN3, PLG, TMPRSS3, CTSK, FOLH1, GZMK, BACE2, ST14, CTSC, PRSS23, IGLC1, GCA, ADAMDEC1	1191	500	16792	1.35351	1	0.552114	41.9801
GOTERM_BP_DIRECT	GO:0001578~microtubule bundle formation	6	0.447427	0.0286574	CAPN6, PRC1, MAP2, MAP1B, MTCL1, KIF20A	1191	25	16792	3.38378	1	0.550322	42.0232
GOTERM_BP_DIRECT	GO:0000070~mitotic sister chromatid segregation	6	0.447427	0.0286574	MAD2L1, CENPA, NEK2, ZWINT, NUSAP1, NDC80	1191	25	16792	3.38378	1	0.550322	42.0232
GOTERM_BP_DIRECT	GO:0060135~maternal process involved in female pregnancy	6	0.447427	0.0286574	HAVCR2, IFI27, CCL2, ADCY7, AKR1B1, MMP7	1191	25	16792	3.38378	1	0.550322	42.0232
GOTERM_BP_DIRECT	GO:0042327~positive regulation of phosphorylation	6	0.447427	0.0286574	AR, ITGA6, NCKAP1L, THBS1, CCL5, FZD7	1191	25	16792	3.38378	1	0.550322	42.0232
GOTERM_BP_DIRECT	GO:0071222~cellular response to lipopolysaccharide	15	1.11857	0.0286781	HAVCR2, HMGB2, CCL2, CXCL8, CXCL10, CMPK2, EDNRB, LILRB2, CD86, CCL20, CCR5, KLRC4-KLRK1, PYCARD, GSTP1, ADAM9	1191	113	16792	1.87156	1	0.548319	42.0463
KEGG_PATHWAY	hsa05218:Melanoma	12	0.894855	0.0288119	PIK3CG, CDKN1A, E2F3, CCND1, PDGFA, MITF, PDGFRA, MDM2, PDGFD, RB1, HGF, PIK3R3	568	71	6910	2.05614	0.999687	0.14122	32.0024
GOTERM_BP_DIRECT	GO:0003149~membranous septum morphogenesis	4	0.298285	0.029227	FGFR2, FZD1, FZD2, TGFB2	1191	10	16792	5.63963	1	0.552981	42.6573
GOTERM_BP_DIRECT	GO:0010820~positive regulation of T cell chemotaxis	4	0.298285	0.029227	CXCL13, CCR2, CCL5, XCL1	1191	10	16792	5.63963	1	0.552981	42.6573
GOTERM_BP_DIRECT	GO:0006268~DNA unwinding involved in DNA replication	4	0.298285	0.029227	MCM2, MCM4, TOP2A, MCM6	1191	10	16792	5.63963	1	0.552981	42.6573
GOTERM_BP_DIRECT	GO:0045723~positive regulation of fatty acid biosynthetic process	4	0.298285	0.029227	SLC45A3, APOA5, MLXIPL, MID1IP1	1191	10	16792	5.63963	1	0.552981	42.6573
GOTERM_BP_DIRECT	GO:0060174~limb bud formation	4	0.298285	0.029227	FGFR2, SOX4, SEMA3C, SOX9	1191	10	16792	5.63963	1	0.552981	42.6573
GOTERM_BP_DIRECT	GO:0051965~positive regulation of synapse assembly	10	0.745712	0.029786	AMIGO2, FLRT2, SLITRK3, SRPX2, NRXN3, IL1RAP, CUX2, THBS2, TPBG, EPHB1	1191	62	16792	2.27404	1	0.557667	43.2732
GOTERM_BP_DIRECT	GO:0006968~cellular defense response	10	0.745712	0.029786	ITK, LILRB2, C5AR1, CCR5, LY96, CCR2, MNDA, CXCL9, DCDC2, TRAT1	1191	62	16792	2.27404	1	0.557667	43.2732
GOTERM_BP_DIRECT	GO:0043588~skin development	7	0.521999	0.0304155	FRAS1, ITGA6, PDGFA, COL3A1, ADAMTS2, COL5A2, COL5A1	1191	34	16792	2.90275	1	0.563102	43.9593
GOTERM_MF_DIRECT	GO:0042626~ATPase activity, coupled to transmembrane movement of substances	8	0.59657	0.0305172	ABCC9, TAP2, TAP1, ABCC4, ABCC1, ABCB1, CFTR, ABCG2	1172	44	16881	2.61883	1	0.526685	39.5794
GOTERM_MF_DIRECT	GO:0050840~extracellular matrix binding	6	0.447427	0.0308904	ITGAV, DCN, SPARC, THBS1, SPP1, CYR61	1172	26	16881	3.3239	1	0.524314	39.9564
GOTERM_MF_DIRECT	GO:0004252~serine-type endopeptidase activity	27	2.01342	0.0313168	IGHG1, IGLV1-44, IGKV1-17, MMP7, C1R, C1S, MMP2, LPA, KLKB1, FCN2, FCN1, CFI, IGKC, F11, GZMA, MMP19, CTSS, HGF, HPR, TMPRSS3, PLG, CTSK, GZMK, ST14, CTSC, PRSS23, IGLC1	1172	255	16881	1.52509	1	0.522632	40.3845
GOTERM_CC_DIRECT	GO:0043202~lysosomal lumen	12	0.894855	0.031469	GPC4, GPC3, HPSE, LUM, IFI30, VCAN, GYG1, DCN, CTSS, CD1E, CD74, PRELP	1258	85	18224	2.04515	1	0.351063	37.4185
GOTERM_BP_DIRECT	GO:0045893~positive regulation of transcription, DNA-templated	49	3.65399	0.0315021	E2F3, HMGB2, ELF3, GLIS2, FOXM1, MITF, FHL2, RORC, SOX4, EHF, ELK3, SOX9, SEC14L2, TGFB1, LBH, SMARCD3, TCF4, RUNX2, CCNA2, MYC, RUNX3, AR, TESC, EGR2, MLXIPL, ESRRG, EOMES, FZD1, ATAD2, LEF1, CREB5, RB1, FZD2, ARNTL, STAT1, CAPN3, TOX3, FZD7, CDKN1C, ATF5, CD86, NR1I2, JUN, MLLT11, IRF1, ZNF711, CKS2, COL1A1, BAMBI	1191	515	16792	1.34147	1	0.573803	45.1252
GOTERM_CC_DIRECT	GO:0042101~T cell receptor complex	5	0.372856	0.0316411	CD3G, CD3D, CD8A, TRAT1, SYK	1258	18	18224	4.02402	1	0.346042	37.5813
GOTERM_BP_DIRECT	GO:0043547~positive regulation of GTPase activity	53	3.95227	0.0318198	PDGFA, EZH2, RASGEF1A, ARHGAP18, CSF2RB, DEPDC1B, ARHGAP8, ERRFI1, DOCK11, ARHGAP9, ARHGEF3, DEPDC1, ECT2, THY1, ARHGAP30, NCK2, JUN, PDGFRA, OPHN1, SEMA4D, SRGAP1, FGFR2, CAV2, CCL3, CCL2, ARHGEF26, AGFG1, KITLG, CCL8, CCL5, CCL4, RGS10, TAGAP, CCL20, RASGRP1, CDC42EP3, VAV3, NCKAP1L, CCL19, DOCK8, RACGAP1, CCL18, P2RY12, RGS1, CCL14, ITGA6, RGS4, GFRA1, SPTBN1, JAK1, JAK3, HTR2B, XCL1	1191	565	16792	1.32257	1	0.575287	45.4617
GOTERM_BP_DIRECT	GO:0050727~regulation of inflammatory response	10	0.745712	0.0326488	FANCD2, ANXA1, PYCARD, ACE2, FABP4, STK39, ADAMTS12, BIRC3, XCL1, CASP1	1191	63	16792	2.23795	1	0.582595	46.3305
GOTERM_BP_DIRECT	GO:0000086~G2/M transition of mitotic cell cycle	17	1.26771	0.0331273	CDK1, NEK2, FOXM1, TPX2, CEP41, ARPP19, AURKA, BIRC5, ABCB1, HMMR, AJUBA, CCNB1, CDKN1A, CCNB2, TUBA1A, MELK, PHLDA1	1191	137	16792	1.74952	1	0.585788	46.826
GOTERM_BP_DIRECT	GO:0061098~positive regulation of protein tyrosine kinase activity	6	0.447427	0.0334753	CD24, FAM150B, CCL5, GREM1, GPRC5B, GAS6	1191	26	16792	3.25363	1	0.587477	47.1837
GOTERM_BP_DIRECT	GO:0070328~triglyceride homeostasis	6	0.447427	0.0334753	GCKR, IL18, APOA5, ACSM2A, MLXIPL, LIPC	1191	26	16792	3.25363	1	0.587477	47.1837
GOTERM_BP_DIRECT	GO:0035025~positive regulation of Rho protein signal transduction	6	0.447427	0.0334753	GPR18, ROBO1, COL3A1, F2RL1, GPR65, LPAR1	1191	26	16792	3.25363	1	0.587477	47.1837
KEGG_PATHWAY	hsa05230:Central carbon metabolism in cancer	11	0.820283	0.0343425	GLS2, PIK3CG, FGFR2, GCK, HKDC1, GLS, PDGFRA, PFKP, PFKM, PIK3R3, MYC	568	64	6910	2.09094	0.999935	0.163571	36.9375
GOTERM_BP_DIRECT	GO:0036120~cellular response to platelet-derived growth factor stimulus	5	0.372856	0.0345016	CCL2, PDGFD, ERRFI1, CCNA2, MYC	1191	18	16792	3.91641	1	0.596532	48.2254
GOTERM_BP_DIRECT	GO:0010039~response to iron ion	5	0.372856	0.0345016	CCND1, TFR2, BCL2, CYBRD1, MDM2	1191	18	16792	3.91641	1	0.596532	48.2254
GOTERM_BP_DIRECT	GO:0045089~positive regulation of innate immune response	5	0.372856	0.0345016	HMGB2, GBP5, CCL5, MMP2, TLR8	1191	18	16792	3.91641	1	0.596532	48.2254
GOTERM_BP_DIRECT	GO:0051897~positive regulation of protein kinase B signaling	12	0.894855	0.0345223	PIK3CG, CCL3, PDGFA, HPSE, CCL21, IL18, CHI3L1, CCL19, THBS1, TSPYL5, TGFB1, GAS6	1191	84	16792	2.01415	1	0.594582	48.2462
GOTERM_BP_DIRECT	GO:0072593~reactive oxygen species metabolic process	7	0.521999	0.034584	GLS2, CTGF, BCL2, AOX1, PDK4, EPHX2, CYR61	1191	35	16792	2.81982	1	0.593088	48.3081
GOTERM_CC_DIRECT	GO:0008305~integrin complex	6	0.447427	0.0350763	ITGA6, ITGB8, ITGAV, ITGA2, ITGA4, ITGAM	1258	27	18224	3.21922	1	0.369307	40.7496
GOTERM_MF_DIRECT	GO:0004181~metallocarboxypeptidase activity	6	0.447427	0.0358163	AGBL2, AEBP1, FOLH1, CPE, ACE2, CPA3	1172	27	16881	3.2008	1	0.564934	44.7301
GOTERM_MF_DIRECT	GO:0042056~chemoattractant activity	6	0.447427	0.0358163	CCL3, HMGB2, LGALS3, HGF, CCL5, GPNMB	1172	27	16881	3.2008	1	0.564934	44.7301
KEGG_PATHWAY	hsa00471:D-Glutamine and D-glutamate metabolism	3	0.223714	0.036069	GLS2, GLUD2, GLS	568	4	6910	9.12412	0.99996	0.168352	38.4089
GOTERM_MF_DIRECT	GO:0043225~anion transmembrane-transporting ATPase activity	4	0.298285	0.0360749	ABCC9, ABCC4, ABCC1, CFTR	1172	11	16881	5.23767	1	0.561067	44.9707
GOTERM_BP_DIRECT	GO:0043123~positive regulation of I-kappaB kinase/NF-kappaB signaling	19	1.41685	0.0364442	S100A4, F2RL1, CCL19, GJA1, WLS, LPAR1, BIRC3, GPRC5B, TRIM22, ECT2, AJUBA, APOL3, PLK2, CCL21, ZDHHC13, TNFRSF19, CASP1, HTR2B, TRAF5	1191	161	16792	1.66387	1	0.610498	50.1439
GOTERM_MF_DIRECT	GO:0008144~drug binding	11	0.820283	0.0366101	TYMS, GLRB, HMGB2, NR1I2, CYP2C9, CYP2D6, DCK, HTR2B, TOP2A, GSTP1, TLR8	1172	76	16881	2.08473	1	0.560092	45.4653
GOTERM_BP_DIRECT	GO:0008015~blood circulation	8	0.59657	0.0376174	COL4A3, FLI1, LPA, AVPR1A, GUCY1A3, STAT1, MYOF, CXCL10	1191	45	16792	2.5065	1	0.620221	51.2697
GOTERM_BP_DIRECT	GO:0032147~activation of protein kinase activity	8	0.59657	0.0376174	KIF14, RGCC, ADRA2A, TPX2, NCKAP1L, GPRC5B, ECT2, TGFB2	1191	45	16792	2.5065	1	0.620221	51.2697
GOTERM_BP_DIRECT	GO:0032870~cellular response to hormone stimulus	8	0.59657	0.0376174	JUN, IGFBP7, ADRA2A, AVPR1A, CACNA1H, ASNS, SIK1, SLIT2	1191	45	16792	2.5065	1	0.620221	51.2697
GOTERM_MF_DIRECT	GO:0016491~oxidoreductase activity	22	1.64057	0.0376711	CYP3A4, CYP3A5, ALDH1L1, SORD, CYP2C19, HSD17B14, CYP2C9, CYP2D6, CYP1A2, FAR1, BLVRA, DHRS2, TP53I3, RRM2, HAO2, AKR1B1, AOX1, SLC9B2, HEPH, MICAL1, SCD5, SARDH	1172	200	16881	1.58439	1	0.564332	46.4335
GOTERM_CC_DIRECT	GO:0043034~costamere	5	0.372856	0.0379534	KRT19, ANK2, ANK3, SMPX, HOMER1	1258	19	18224	3.81223	1	0.386383	43.2872
GOTERM_BP_DIRECT	GO:0001886~endothelial cell morphogenesis	4	0.298285	0.0381132	ARHGEF26, ID1, HEG1, STC1	1191	11	16792	5.12694	1	0.622999	51.7383
GOTERM_BP_DIRECT	GO:0046622~positive regulation of organ growth	4	0.298285	0.0381132	IL7, YBX3, YAP1, SASH3	1191	11	16792	5.12694	1	0.622999	51.7383
GOTERM_BP_DIRECT	GO:0010759~positive regulation of macrophage chemotaxis	4	0.298285	0.0381132	CCL2, C5AR1, THBS1, CCL5	1191	11	16792	5.12694	1	0.622999	51.7383
GOTERM_BP_DIRECT	GO:0050868~negative regulation of T cell activation	4	0.298285	0.0381132	VTCN1, PTPN22, JAK3, PAG1	1191	11	16792	5.12694	1	0.622999	51.7383
GOTERM_BP_DIRECT	GO:0033690~positive regulation of osteoblast proliferation	4	0.298285	0.0381132	CTHRC1, HPSE, ITGAV, CYR61	1191	11	16792	5.12694	1	0.622999	51.7383
GOTERM_BP_DIRECT	GO:0010763~positive regulation of fibroblast migration	4	0.298285	0.0381132	SLC8A1, UTS2, THBS1, TGFB1	1191	11	16792	5.12694	1	0.622999	51.7383
GOTERM_BP_DIRECT	GO:0003181~atrioventricular valve morphogenesis	4	0.298285	0.0381132	HEYL, MDM2, TGFB2, CYR61	1191	11	16792	5.12694	1	0.622999	51.7383
GOTERM_CC_DIRECT	GO:0016021~integral component of membrane	385	28.7099	0.0386779	C15ORF48, CYP3A4, CYP3A5, ADCY1, RARRES1, ADCY7, VTCN1, OSMR, CYP2D6, DNAJB14, SYT9, AQP4, CD52, PVRIG, CD53, LPAR1, AQP1, IGHM, UXS1, CD48, CD47, TMEM144, CD44, LCAT, CH25H, CLEC4G, KCNK5, PHTF2, CLEC4A, SLC9B2, TMEM185B, FAS, SCD5, CDH23, ADAM9, ACSM2B, CD3G, CD3D, TMEM200A, CDHR5, CYP1A2, LHFP, LPCAT2, PTPRO, HLA-DQA1, CLEC4M, LILRB2, SIRPG, CCR5, TACSTD2, BACE2, CCR2, SMPX, YME1L1, HLA-DPA1, …	1258	5163	18224	1.08024	1	0.385575	43.91
GOTERM_BP_DIRECT	GO:0042476~odontogenesis	6	0.447427	0.0387667	FGFR2, MYO5A, COL1A2, AQP1, LAMB1, TGFB2	1191	27	16792	3.13313	1	0.627256	52.3493
GOTERM_BP_DIRECT	GO:0031032~actomyosin structure organization	6	0.447427	0.0387667	FRMD3, EPB41L2, EPB41L3, FRMD6, EPB41L4A, MYLIP	1191	27	16792	3.13313	1	0.627256	52.3493
GOTERM_BP_DIRECT	GO:0043001~Golgi to plasma membrane protein transport	6	0.447427	0.0387667	RAB31, BLZF1, ANK3, VAMP5, SPTBN1, AMN	1191	27	16792	3.13313	1	0.627256	52.3493
GOTERM_BP_DIRECT	GO:0051384~response to glucocorticoid	10	0.745712	0.0389337	TYMS, PTGDS, BCHE, PAPPA, BCL2, FAS, SPARC, TAT, ANXA3, ADAM9	1191	65	16792	2.16909	1	0.62676	52.5043
GOTERM_BP_DIRECT	GO:0046330~positive regulation of JNK cascade	10	0.745712	0.0389337	CTGF, CCL21, RASGRP1, RASSF2, F2RL1, PYCARD, CCL19, TNFRSF19, FZD7, CD27	1191	65	16792	2.16909	1	0.62676	52.5043
GOTERM_BP_DIRECT	GO:0008217~regulation of blood pressure	10	0.745712	0.0389337	EDNRA, ACSM3, EDNRB, SGK1, UTS2, PTGS1, COL1A2, EPHX2, GUCY1A3, STK39	1191	65	16792	2.16909	1	0.62676	52.5043
KEGG_PATHWAY	hsa04390:Hippo signaling pathway	20	1.49142	0.0394598	PPP2R1B, FZD1, LEF1, BIRC5, FZD2, WWTR1, FZD7, CTNNA3, TGFB1, FZD6, TGFB2, AJUBA, CCND1, FRMD6, CTGF, ID1, CCND2, YAP1, MYC, BMP5	568	151	6910	1.61132	0.999985	0.179976	41.2067
GOTERM_BP_DIRECT	GO:0006928~movement of cell or subcellular component	12	0.894855	0.0400588	LYVE1, ENPP2, SPINT2, VIM, ADRA2A, CXCL8, FPR3, CHST4, MSN, MYLIP, TPM1, CCL4	1191	86	16792	1.96731	1	0.635359	53.536
GOTERM_CC_DIRECT	GO:0000775~chromosome, centromeric region	9	0.671141	0.0408044	CENPA, PKHD1, OIP5, NUF2, CENPF, CENPW, BIRC5, NDC80, HELLS	1258	57	18224	2.28734	1	0.395569	45.7015
GOTERM_CC_DIRECT	GO:0000778~condensed nuclear chromosome kinetochore	3	0.223714	0.0413236	CENPA, BUB1B, MIS18BP1	1258	5	18224	8.69189	1	0.393097	46.1308
GOTERM_BP_DIRECT	GO:0001894~tissue homeostasis	5	0.372856	0.0413241	CTGF, AKR1B1, RB1, SOX9, BARD1	1191	19	16792	3.71028	1	0.644953	54.6709
GOTERM_BP_DIRECT	GO:0007026~negative regulation of microtubule depolymerization	5	0.372856	0.0413241	CKAP2, STMN2, MID1IP1, MID1, HDGFRP3	1191	19	16792	3.71028	1	0.644953	54.6709
GOTERM_BP_DIRECT	GO:0045879~negative regulation of smoothened signaling pathway	5	0.372856	0.0413241	GPC3, SERPINE2, GLIS2, RB1, RUNX2	1191	19	16792	3.71028	1	0.644953	54.6709
GOTERM_BP_DIRECT	GO:0030324~lung development	11	0.820283	0.0414229	FGFR2, RBP4, GPC3, CRISPLD2, CTGF, CHI3L1, HEG1, ZFPM2, CYP1A2, SPARC, ADAMTS2	1191	76	16792	2.04066	1	0.643778	54.7584
GOTERM_BP_DIRECT	GO:0007050~cell cycle arrest	17	1.26771	0.0415667	MSH2, CXCL8, RB1, CDKN3, GAS6, TGFB1, TGFB2, PLAGL1, CDKN1C, CDKN1A, CDKN2C, IRF1, RHEB, PRKAA2, THBS1, MYC, BARD1	1191	141	16792	1.69989	1	0.64302	54.8855
GOTERM_MF_DIRECT	GO:0030023~extracellular matrix constituent conferring elasticity	3	0.223714	0.0417602	COL4A1, FBN1, EMILIN2	1172	5	16881	8.64215	1	0.596416	50.0162
GOTERM_MF_DIRECT	GO:0016641~oxidoreductase activity, acting on the CH-NH2 group of donors, oxygen as acceptor	3	0.223714	0.0417602	LOXL4, LOXL2, LOXL1	1172	5	16881	8.64215	1	0.596416	50.0162
GOTERM_BP_DIRECT	GO:0051591~response to cAMP	8	0.59657	0.0417623	THBD, JUN, MMP19, PKLR, COL1A1, SPARC, STAT1, PLA2G5	1191	46	16792	2.45201	1	0.642734	55.0578
GOTERM_BP_DIRECT	GO:0032729~positive regulation of interferon-gamma production	8	0.59657	0.0417623	HAVCR2, IL18, CCR2, PYCARD, KLRC4-KLRK1, HLA-DPA1, HLA-DPB1, SASH3	1191	46	16792	2.45201	1	0.642734	55.0578
GOTERM_BP_DIRECT	GO:0016049~cell growth	9	0.671141	0.0426184	TYMS, AR, ITGAV, BCL2, ADRA1A, IL7R, TGFB1, EMP1, TGFB2	1191	56	16792	2.26592	1	0.648321	55.8046
KEGG_PATHWAY	hsa00051:Fructose and mannose metabolism	7	0.521999	0.0429789	SORD, PFKFB3, HKDC1, AKR1B10, AKR1B1, PFKP, PFKM	568	32	6910	2.6612	0.999995	0.191612	43.9859
GOTERM_BP_DIRECT	GO:0010936~negative regulation of macrophage cytokine production	3	0.223714	0.0434503	IRAK3, TGFB1, TGFB2	1191	5	16792	8.45945	1	0.653557	56.519
GOTERM_BP_DIRECT	GO:0032611~interleukin-1 beta production	3	0.223714	0.0434503	PYCARD, MR1, CASP1	1191	5	16792	8.45945	1	0.653557	56.519
GOTERM_BP_DIRECT	GO:1990314~cellular response to insulin-like growth factor stimulus	3	0.223714	0.0434503	FBN1, CCNA2, TGFB1	1191	5	16792	8.45945	1	0.653557	56.519
GOTERM_BP_DIRECT	GO:0033591~response to L-ascorbic acid	3	0.223714	0.0434503	ITGA2, SPARC, GSTP1	1191	5	16792	8.45945	1	0.653557	56.519
GOTERM_BP_DIRECT	GO:0070100~negative regulation of chemokine-mediated signaling pathway	3	0.223714	0.0434503	ROBO1, CCL5, SLIT2	1191	5	16792	8.45945	1	0.653557	56.519
GOTERM_BP_DIRECT	GO:0050819~negative regulation of coagulation	3	0.223714	0.0434503	PROCR, ANXA5, ANXA4	1191	5	16792	8.45945	1	0.653557	56.519
GOTERM_BP_DIRECT	GO:0016202~regulation of striated muscle tissue development	3	0.223714	0.0434503	CENPF, LEF1, TGFB1	1191	5	16792	8.45945	1	0.653557	56.519
GOTERM_BP_DIRECT	GO:0032354~response to follicle-stimulating hormone	3	0.223714	0.0434503	PAPPA, ASNS, SRD5A2	1191	5	16792	8.45945	1	0.653557	56.519
GOTERM_BP_DIRECT	GO:0045636~positive regulation of melanocyte differentiation	3	0.223714	0.0434503	BCL2, KITLG, ZEB2	1191	5	16792	8.45945	1	0.653557	56.519
GOTERM_BP_DIRECT	GO:0035556~intracellular signal transduction	39	2.90828	0.0437952	CXCL1, ADCY1, ZBTB33, ADCY7, STK17B, CXCL8, STK17A, CTGF, PPP1R1A, GUCY1A2, GUCY1A3, STK39, PRKAA2, DEPDC1B, SIK1, PAG1, SYK, FYB, ARHGEF3, ITK, SGK1, MLXIPL, DCDC2, DGKH, SOCS4, DEPDC1, RACGAP1, STK4, ECT2, DCDC1, CLEC4M, SIRPG, JAK1, ADRA1A, AKAP7, STMN1, JAK3, MELK, LCP2	1191	403	16792	1.36443	1	0.654514	56.8121
GOTERM_BP_DIRECT	GO:0045597~positive regulation of cell differentiation	7	0.521999	0.0439813	AR, UTS2, SOCS3, CTGF, JUN, EOMES, CYR61	1191	37	16792	2.66739	1	0.654106	56.9694
GOTERM_BP_DIRECT	GO:0042130~negative regulation of T cell proliferation	7	0.521999	0.0439813	HAVCR2, TNFRSF21, LILRB2, HLA-DRB1, CLEC4G, GPNMB, TGFB1	1191	37	16792	2.66739	1	0.654106	56.9694
KEGG_PATHWAY	hsa05144:Malaria	9	0.671141	0.0441726	CCL2, IL18, KLRC4-KLRK1, CXCL8, HGF, THBS1, THBS2, TGFB1, TGFB2	568	49	6910	2.23448	0.999996	0.193446	44.9007
GOTERM_BP_DIRECT	GO:0006910~phagocytosis, recognition	6	0.447427	0.0445393	IGHG1, CLEC7A, IGKC, IGHM, IGLL5, IGLC1	1191	28	16792	3.02123	1	0.656851	57.4378
GOTERM_CC_DIRECT	GO:0005769~early endosome	24	1.78971	0.0448705	HAVCR2, MYO5A, TF, PARM1, CYTIP, SORL1, F2RL1, GJA1, ACKR3, CFTR, VPS41, GPER1, WLS, SAMD9L, CD1E, ANXA2, EPHA3, RND2, RAB31, LAMP3, CXCR4, INPP5F, SORT1, NEURL1B	1258	229	18224	1.51823	1	0.412666	48.9796
GOTERM_CC_DIRECT	GO:0032433~filopodium tip	4	0.298285	0.0450322	MYO5A, OSBPL3, VIL1, EPHB1	1258	12	18224	4.82883	1	0.407523	49.1061
GOTERM_CC_DIRECT	GO:0001726~ruffle	12	0.894855	0.0450991	MYO5A, S100A6, TESC, MYO6, ARHGEF26, PODXL, VIL1, S100A11, WIPF1, PALLD, SAMSN1, ANXA2	1258	90	18224	1.93153	1	0.401877	49.1583
GOTERM_MF_DIRECT	GO:0001102~RNA polymerase II activating transcription factor binding	7	0.521999	0.0451198	IFI27, EGR2, JUN, EOMES, BEX1, RB1, BHLHE41	1172	38	16881	2.65329	1	0.619287	52.7902
GOTERM_MF_DIRECT	GO:0051287~NAD binding	7	0.521999	0.0451198	ME1, LDHB, CTBP2, SORD, ADH4, AOX1, GLYR1	1172	38	16881	2.65329	1	0.619287	52.7902
GOTERM_MF_DIRECT	GO:0015075~ion transmembrane transporter activity	4	0.298285	0.0456785	PLP2, S100A6, SFXN3, GJA1	1172	12	16881	4.80119	1	0.617841	53.2372
GOTERM_BP_DIRECT	GO:0006952~defense response	10	0.745712	0.045993	CD84, CD48, CYSLTR1, TAP1, RNASE6, CXCL9, HCP5, IL32, MX1, CD74	1191	67	16792	2.10434	1	0.666926	58.6356
GOTERM_BP_DIRECT	GO:0045860~positive regulation of protein kinase activity	8	0.59657	0.0461922	PTPRC, CDKN1A, CCL21, RASSF2, CCL19, GAS6, LCP2, CYR61	1191	47	16792	2.39984	1	0.666583	58.7973
GOTERM_BP_DIRECT	GO:0071230~cellular response to amino acid stimulus	8	0.59657	0.0461922	COL4A1, COL3A1, COL1A2, PDGFD, COL1A1, CAPN2, MMP2, COL5A2	1191	47	16792	2.39984	1	0.666583	58.7973
GOTERM_BP_DIRECT	GO:0032760~positive regulation of tumor necrosis factor production	8	0.59657	0.0461922	CCL3, CCL2, LY96, RASGRP1, CD2, PYCARD, CCL19, SASH3	1191	47	16792	2.39984	1	0.666583	58.7973
GOTERM_BP_DIRECT	GO:0030308~negative regulation of cell growth	15	1.11857	0.0472442	CRYAB, GJA1, FRZB, GREM1, SLIT2, TGFB1, TGFB2, RERG, CDKN1A, SERPINE2, CDKN2C, BCL2, WFDC1, EAF2, ZC3H12D	1191	121	16792	1.74782	1	0.673072	59.641
GOTERM_BP_DIRECT	GO:0051382~kinetochore assembly	4	0.298285	0.0482059	CENPA, CENPF, CENPW, CENPH	1191	12	16792	4.69969	1	0.678676	60.398
GOTERM_BP_DIRECT	GO:0030212~hyaluronan metabolic process	4	0.298285	0.0482059	ITIH1, ITIH5, IL15, HGF	1191	12	16792	4.69969	1	0.678676	60.398
GOTERM_BP_DIRECT	GO:0022409~positive regulation of cell-cell adhesion	4	0.298285	0.0482059	CD47, SIRPG, ITGA6, LEF1	1191	12	16792	4.69969	1	0.678676	60.398
GOTERM_BP_DIRECT	GO:0032695~negative regulation of interleukin-12 production	4	0.298285	0.0482059	IRAK3, ACP5, JAK3, THBS1	1191	12	16792	4.69969	1	0.678676	60.398
GOTERM_BP_DIRECT	GO:0043206~extracellular fibril organization	4	0.298285	0.0482059	LTBP2, COL3A1, MFAP4, COL5A1	1191	12	16792	4.69969	1	0.678676	60.398
GOTERM_BP_DIRECT	GO:0019370~leukotriene biosynthetic process	5	0.372856	0.048853	FCER1A, ALOX5AP, ALOX5, PLA2G5, SYK	1191	20	16792	3.52477	1	0.681737	60.8997
GOTERM_BP_DIRECT	GO:0007094~mitotic spindle assembly checkpoint	5	0.372856	0.048853	MAD2L1, BUB1, CENPF, TTK, BUB1B	1191	20	16792	3.52477	1	0.681737	60.8997
GOTERM_CC_DIRECT	GO:0043231~intracellular membrane-bounded organelle	50	3.72856	0.0491353	CYP3A4, CYP3A5, CYP2C19, PTGS1, RORC, CTGF, HPSE, CYP7A1, PARM1, DTL, ACKR3, ARNTL, CTSS, CYP1A2, MCM3, ARHGAP30, CD86, FAM72A, ZDHHC13, SPATA18, VCAN, EIF5A2, PMEPA1, CROT, FGFR2, FXYD2, AGFG1, SLC37A4, IFI30, ANLN, ELK3, OAS2, GPRC5B, PLAGL1, PPP1R3B, TRIM69, UGT2A3, MYOF, COL4A3, COL4A2, CYP2C9, PODXL, PROM1, CYP4A11, TMEM165, SAMD9, SYT13, CLEC7A, ATP8A1, BARD1	1258	558	18224	1.29807	1	0.423248	52.219
GOTERM_BP_DIRECT	GO:0001568~blood vessel development	7	0.521999	0.0492226	ITGAV, COL1A2, MDM2, COL1A1, ANTXR1, COL5A1, FLVCR1	1191	38	16792	2.5972	1	0.68264	61.1836
GOTERM_BP_DIRECT	GO:2001237~negative regulation of extrinsic apoptotic signaling pathway	7	0.521999	0.0492226	AR, ITGA6, LGALS3, ITGAV, YAP1, THBS1, GSTP1	1191	38	16792	2.5972	1	0.68264	61.1836
KEGG_PATHWAY	hsa04668:TNF signaling pathway	15	1.11857	0.0503613	CXCL1, PIK3CG, CCL2, SOCS3, CXCL2, CREB5, IL15, BIRC3, CCL5, CXCL10, CCL20, JUN, FAS, PIK3R3, TRAF5	568	106	6910	1.72153	0.999999	0.21473	49.4259
GOTERM_BP_DIRECT	GO:0005977~glycogen metabolic process	6	0.447427	0.050798	G6PC, PPP1R3C, PPP1R3B, PPP1R1A, SLC37A4, GNMT	1191	29	16792	2.91705	1	0.692491	62.3718
GOTERM_BP_DIRECT	GO:0045909~positive regulation of vasodilation	6	0.447427	0.050798	SCPEP1, UTS2, F2RL1, EPHX2, GJA1, GPER1	1191	29	16792	2.91705	1	0.692491	62.3718
GOTERM_BP_DIRECT	GO:0001937~negative regulation of endothelial cell proliferation	6	0.447427	0.050798	CAV2, RGCC, GJA1, SPARC, THBS1, STAT1	1191	29	16792	2.91705	1	0.692491	62.3718
GOTERM_BP_DIRECT	GO:0030203~glycosaminoglycan metabolic process	6	0.447427	0.050798	GPC4, B3GAT1, GPC3, CHST9, VCAN, DCN	1191	29	16792	2.91705	1	0.692491	62.3718
KEGG_PATHWAY	hsa04064:NF-kappa B signaling pathway	13	0.969426	0.0508023	TNFRSF11A, TNFSF13B, LY96, CCL21, BCL2, LCK, BCL2A1, CXCL8, CCL19, BIRC3, TRAF5, CCL4, SYK	568	87	6910	1.81783	0.999999	0.213243	49.7349
GOTERM_BP_DIRECT	GO:0051603~proteolysis involved in cellular protein catabolic process	8	0.59657	0.0509116	SCPEP1, CTSK, GZMA, CTSC, ADAMTS12, CTSS, CAPN2, PSMB9	1191	48	16792	2.34985	1	0.691439	62.4562
GOTERM_CC_DIRECT	GO:0005794~Golgi apparatus	73	5.4437	0.0513727	F2RL1, IGFBP6, SORL1, PTGS1, TLR1, GJA1, IL15, ST3GAL1, GLT8D2, CD44, CTGF, ANK3, ST3GAL6, ATP8B1, ATP8B2, JAKMIP2, CCNA2, GOLM1, CDC6, PARM1, MYO6, CRYAB, STMN2, GPER1, WLS, BICD1, FAM134B, PTGDS, CPE, ASCC3, BACE2, ZDHHC13, CLIC5, VAMP5, SORT1, PTGFRN, COL1A1, BTN3A3, PLA2G5, MYO5A, FGFR2, CAV2, GLIS3, FUT8, NEDD9, EHF, ITM2A, PLAGL1, GNPTAB, TMED3, TRIM69, RASGRP1, FUT4, NDRG2, FIBIN, STX11, S…	1258	863	18224	1.22539	1	0.431757	53.8409
GOTERM_CC_DIRECT	GO:0009925~basal plasma membrane	6	0.447427	0.0522999	P2RY12, TF, ITGA6, TACSTD2, ANK3, AQP1	1258	30	18224	2.8973	1	0.431654	54.4978
GOTERM_CC_DIRECT	GO:0042629~mast cell granule	5	0.372856	0.0525799	PIK3CG, RASGRP1, AKR1B1, ANXA1, SRGN	1258	21	18224	3.44916	1	0.427535	54.6945
GOTERM_BP_DIRECT	GO:0006810~transport	34	2.53542	0.052919	MYO5A, RBP5, FXYD2, ATP1B3, RBP1, GABRB3, SLC37A4, SORL1, AQP4, GJA1, SEC14L2, SLC7A6, LAPTM5, TMED3, SLC51A, FLVCR1, AR, SLC12A2, ABCB1, CFTR, BICD1, ABCG2, P2RX5, LYVE1, PTGDS, UCP2, ATP2A3, CLIC5, SLC25A36, SLC7A1, SLC6A6, CACNA1H, FABP4, ABCC1	1191	348	16792	1.3775	1	0.703935	63.9174
GOTERM_MF_DIRECT	GO:0003690~double-stranded DNA binding	11	0.820283	0.0530258	HMGB2, RAD51AP1, MSH2, DDX60, YBX3, MND1, IFI16, STAT1, MYC, FEN1, AIM2	1172	81	16881	1.95604	1	0.668077	58.7586
GOTERM_MF_DIRECT	GO:0008237~metallopeptidase activity	11	0.820283	0.0530258	ADAM28, ERMP1, CNDP1, PAPPA, STAMBPL1, ACE2, MME, YME1L1, ADAMTS2, MMP2, ADAM9	1172	81	16881	1.95604	1	0.668077	58.7586
GOTERM_MF_DIRECT	GO:0004198~calcium-dependent cysteine-type endopeptidase activity	5	0.372856	0.0534916	CAPN6, CAPN5, CAPN2, CAPN3, GCA	1172	21	16881	3.42942	1	0.665509	59.0872
KEGG_PATHWAY	hsa04540:Gap junction	13	0.969426	0.0546514	CDK1, ADCY1, ADCY7, PDGFA, GJA1, LPAR1, PDGFRA, GUCY1A2, TUBB6, GUCY1A3, PDGFD, TUBA1A, HTR2B	568	88	6910	1.79718	1	0.224532	52.3586
GOTERM_BP_DIRECT	GO:0000079~regulation of cyclin-dependent protein serine/threonine kinase activity	7	0.521999	0.0548315	CCNE2, CDC6, CDKN1A, DIRAS3, CDKN2C, CDKN3, CCNA2	1191	39	16792	2.5306	1	0.715195	65.2592
GOTERM_BP_DIRECT	GO:0071407~cellular response to organic cyclic compound	9	0.671141	0.0553636	CCNB1, CCL3, SMAD9, CCL2, ITGA6, IL18, CCL5, STAT1, TGFB1	1191	59	16792	2.15071	1	0.716919	65.6241
GOTERM_BP_DIRECT	GO:0051216~cartilage development	9	0.671141	0.0553636	TYMS, SMAD9, CD44, ITGB8, LUM, CHI3L1, SOX9, BMP5, TIMP1	1191	59	16792	2.15071	1	0.716919	65.6241
GOTERM_CC_DIRECT	GO:0005856~cytoskeleton	35	2.60999	0.0554174	GAS2L3, ENAH, PRC1, VIM, EPB41L4A, KITLG, MYLIP, TPM1, FAM65B, FRMD3, PFN2, FRMD6, ANK2, SYNJ2, MTCL1, STK39, MSN, CYS1, SLC30A9, SWAP70, PTPN14, DPYSL2, NEXN, COTL1, WIPI1, CTNNA3, BICD1, EPB41L2, EPB41L3, NR1I3, JAK1, SGCD, OSBPL10, JAK3, SGCB	1258	371	18224	1.36665	1	0.43913	56.6433
GOTERM_CC_DIRECT	GO:0005614~interstitial matrix	4	0.298285	0.0556224	SMOC2, NAV2, TNC, CCDC80	1258	13	18224	4.45738	1	0.434635	56.781
GOTERM_BP_DIRECT	GO:0042060~wound healing	11	0.820283	0.0556244	CCL20, PDGFA, TNC, COL3A1, PDGFRA, DCN, ELK3, SPARC, TPM1, TGFB2, TIMP1	1191	80	16792	1.93862	1	0.716829	65.8016
GOTERM_MF_DIRECT	GO:0019841~retinol binding	4	0.298285	0.0564048	RBP5, RBP4, RBP1, ADH4	1172	13	16881	4.43187	1	0.679695	61.0869
GOTERM_CC_DIRECT	GO:0031901~early endosome membrane	14	1.044	0.0564585	SH3GL3, ANXA1, CFTR, WLS, EPHB1, HLA-F, MTMR2, FCGR1A, TMEM165, FCGR1B, INPP5F, PMEPA1, EHD4, SNX20	1258	116	18224	1.74837	1	0.43398	57.3385
GOTERM_BP_DIRECT	GO:0033198~response to ATP	5	0.372856	0.0570842	P2RX5, SLC8A1, SELL, PKLR, CASP1	1191	21	16792	3.35692	1	0.724526	66.7792
GOTERM_BP_DIRECT	GO:0031954~positive regulation of protein autophosphorylation	5	0.372856	0.0570842	RAP2B, PDGFA, RASSF2, PDGFD, GPNMB	1191	21	16792	3.35692	1	0.724526	66.7792
GOTERM_BP_DIRECT	GO:0071480~cellular response to gamma radiation	5	0.372856	0.0570842	CDKN1A, CRYAB, ATR, YAP1, TSPYL5	1191	21	16792	3.35692	1	0.724526	66.7792
GOTERM_BP_DIRECT	GO:0044344~cellular response to fibroblast growth factor stimulus	6	0.447427	0.0575448	CCL2, CD44, CXCL8, COL1A1, CCL5, MYC	1191	30	16792	2.81982	1	0.725676	67.0821
GOTERM_MF_DIRECT	GO:0019899~enzyme binding	32	2.38628	0.057856	CYP3A4, CYP2C19, MCM10, TGFB1, PDCD2, BLZF1, PPP1R3B, HSPA2, ANK2, BCHE, DNMT3L, APOA5, PYCARD, TOP2A, AR, MSH2, BIRC5, CDC20, CFTR, IL6R, CYP1A2, MCM2, STAT1, COTL1, CCND1, JUN, PCNA, SORT1, CYP2A6, MDM2, GBP1, CBS	1172	333	16881	1.38413	1	0.68358	62.0485
GOTERM_CC_DIRECT	GO:0097169~AIM2 inflammasome complex	3	0.223714	0.0591908	PYCARD, CASP1, AIM2	1258	6	18224	7.24324	1	0.444228	59.114
GOTERM_BP_DIRECT	GO:0043922~negative regulation by host of viral transcription	4	0.298285	0.0594604	CCL3, JUN, CCL5, CCL4	1191	13	16792	4.33818	1	0.73583	68.3142
GOTERM_BP_DIRECT	GO:0045995~regulation of embryonic development	4	0.298285	0.0594604	LAMA2, CDK1, LAMA3, PHLDA2	1191	13	16792	4.33818	1	0.73583	68.3142
GOTERM_BP_DIRECT	GO:0045088~regulation of innate immune response	4	0.298285	0.0594604	IRF1, SAMHD1, PTPN22, BIRC3	1191	13	16792	4.33818	1	0.73583	68.3142
GOTERM_BP_DIRECT	GO:0006536~glutamate metabolic process	4	0.298285	0.0594604	AADAT, NAGS, GLUD2, TAT	1191	13	16792	4.33818	1	0.73583	68.3142
GOTERM_BP_DIRECT	GO:0003215~cardiac right ventricle morphogenesis	4	0.298285	0.0594604	SOX4, SEMA3C, JAG1, TGFB2	1191	13	16792	4.33818	1	0.73583	68.3142
GOTERM_BP_DIRECT	GO:0051926~negative regulation of calcium ion transport	4	0.298285	0.0594604	LILRB2, PACSIN3, ADRA2A, STC1	1191	13	16792	4.33818	1	0.73583	68.3142
GOTERM_MF_DIRECT	GO:0032405~MutLalpha complex binding	3	0.223714	0.0598007	MSH2, PCNA, ATR	1172	6	16881	7.20179	1	0.69042	63.3021
GOTERM_MF_DIRECT	GO:0004499~N,N-dimethylaniline monooxygenase activity	3	0.223714	0.0598007	FMO5, FMO1, FMO2	1172	6	16881	7.20179	1	0.69042	63.3021
GOTERM_MF_DIRECT	GO:0045545~syndecan binding	3	0.223714	0.0598007	HPSE, TNC, GPNMB	1172	6	16881	7.20179	1	0.69042	63.3021
GOTERM_BP_DIRECT	GO:0050679~positive regulation of epithelial cell proliferation	9	0.671141	0.0600972	FGFR2, C5AR1, ID1, CCL5, SOX9, LAMB1, MYC, TGFB1, BMP5	1191	60	16792	2.11486	1	0.737938	68.714
GOTERM_BP_DIRECT	GO:0045669~positive regulation of osteoblast differentiation	9	0.671141	0.0600972	CTHRC1, NPNT, GJA1, ID4, JAG1, IL6R, HGF, RUNX2, CYR61	1191	60	16792	2.11486	1	0.737938	68.714
GOTERM_BP_DIRECT	GO:0009653~anatomical structure morphogenesis	12	0.894855	0.0602768	GPC4, IER3, DKK3, LYVE1, KRT18, GPC3, FAT1, MLXIPL, MCAM, RCAN3, BICD1, CYR61	1191	92	16792	1.83901	1	0.737277	68.8259
GOTERM_CC_DIRECT	GO:0072686~mitotic spindle	7	0.521999	0.0604376	CDK1, MAD2L1, PKHD1, AURKA, GEM, RACGAP1, ECT2	1258	41	18224	2.4733	1	0.445762	59.9011
GOTERM_BP_DIRECT	GO:0006520~cellular amino acid metabolic process	7	0.521999	0.0608105	GLS2, GLUD2, SLC6A6, ASPG, SLC3A1, TAT, SLC7A6	1191	40	16792	2.46734	1	0.738736	69.1562
GOTERM_BP_DIRECT	GO:0007346~regulation of mitotic cell cycle	7	0.521999	0.0608105	CDKN1C, CDKN1A, CKS2, BIRC5, RB1, SIK1, MYC	1191	40	16792	2.46734	1	0.738736	69.1562
KEGG_PATHWAY	hsa05204:Chemical carcinogenesis	12	0.894855	0.0609686	CYP3A43, CYP3A4, CYP2A13, CYP3A5, CYP3A7, CYP2C19, CYP2C9, ADH4, CYP2A6, CYP1A2, UGT2A3, GSTP1	568	80	6910	1.82482	1	0.244242	56.3917
GOTERM_CC_DIRECT	GO:0030496~midbody	15	1.11857	0.0611618	KIF14, CDK1, KIF4A, PRC1, NEK2, CENPF, BIRC5, AURKA, GEM, RACGAP1, ECT2, ANXA2, MTCL1, ASPM, KIF20A	1258	129	18224	1.68448	1	0.444378	60.3518
GOTERM_BP_DIRECT	GO:0010629~negative regulation of gene expression	16	1.19314	0.0612038	HAVCR2, CCL3, CRYAB, IQGAP3, PTPN22, GJA1, RB1, GPER1, ACACB, TGFB1, TGFB2, CCNB1, CDKN1A, CTGF, ITGB8, TRIM6	1191	137	16792	1.64661	1	0.739346	69.3974
GOTERM_MF_DIRECT	GO:0042813~Wnt-activated receptor activity	5	0.372856	0.0619245	FZD1, FZD2, FRZB, FZD7, FZD6	1172	22	16881	3.27354	1	0.698021	64.6268
GOTERM_BP_DIRECT	GO:0030816~positive regulation of cAMP metabolic process	3	0.223714	0.0621582	CXCL9, CXCL11, CXCL10	1191	6	16792	7.04954	1	0.743224	69.9755
GOTERM_BP_DIRECT	GO:0071474~cellular hyperosmotic response	3	0.223714	0.0621582	YBX3, AQP1, ERRFI1	1191	6	16792	7.04954	1	0.743224	69.9755
GOTERM_BP_DIRECT	GO:0006739~NADP metabolic process	3	0.223714	0.0621582	TP53I3, GCK, FMO2	1191	6	16792	7.04954	1	0.743224	69.9755
GOTERM_BP_DIRECT	GO:0035754~B cell chemotaxis	3	0.223714	0.0621582	CXCL13, CH25H, GAS6	1191	6	16792	7.04954	1	0.743224	69.9755
GOTERM_BP_DIRECT	GO:0002933~lipid hydroxylation	3	0.223714	0.0621582	CYP3A4, CYP3A5, CYP3A7	1191	6	16792	7.04954	1	0.743224	69.9755
GOTERM_BP_DIRECT	GO:0023052~signaling	3	0.223714	0.0621582	CCL3, CCR5, DLGAP5	1191	6	16792	7.04954	1	0.743224	69.9755
GOTERM_BP_DIRECT	GO:0031536~positive regulation of exit from mitosis	3	0.223714	0.0621582	BIRC5, UBE2C, TGFB1	1191	6	16792	7.04954	1	0.743224	69.9755
GOTERM_BP_DIRECT	GO:0060561~apoptotic process involved in morphogenesis	3	0.223714	0.0621582	PPP2R1B, CRYAB, LEF1	1191	6	16792	7.04954	1	0.743224	69.9755
GOTERM_BP_DIRECT	GO:0003179~heart valve morphogenesis	3	0.223714	0.0621582	SOX9, TGFB1, TGFB2	1191	6	16792	7.04954	1	0.743224	69.9755
GOTERM_BP_DIRECT	GO:0009804~coumarin metabolic process	3	0.223714	0.0621582	CYP2A13, CYP2D6, CYP2A6	1191	6	16792	7.04954	1	0.743224	69.9755
GOTERM_BP_DIRECT	GO:0002489~antigen processing and presentation of endogenous peptide antigen via MHC class Ib via ER pathway, TAP-dependent	3	0.223714	0.0621582	TAP2, TAP1, ABCB1	1191	6	16792	7.04954	1	0.743224	69.9755
GOTERM_BP_DIRECT	GO:0043615~astrocyte cell migration	3	0.223714	0.0621582	CCL3, CCL2, APCDD1	1191	6	16792	7.04954	1	0.743224	69.9755
GOTERM_BP_DIRECT	GO:0060706~cell differentiation involved in embryonic placenta development	3	0.223714	0.0621582	KRT19, EOMES, STK4	1191	6	16792	7.04954	1	0.743224	69.9755
GOTERM_BP_DIRECT	GO:0046632~alpha-beta T cell differentiation	3	0.223714	0.0621582	BCL11B, ANXA1, LEF1	1191	6	16792	7.04954	1	0.743224	69.9755
GOTERM_BP_DIRECT	GO:0006537~glutamate biosynthetic process	3	0.223714	0.0621582	GLS2, GLUD2, GLS	1191	6	16792	7.04954	1	0.743224	69.9755
GOTERM_BP_DIRECT	GO:0001957~intramembranous ossification	3	0.223714	0.0621582	CTSK, COL1A1, MMP2	1191	6	16792	7.04954	1	0.743224	69.9755
GOTERM_BP_DIRECT	GO:0002485~antigen processing and presentation of endogenous peptide antigen via MHC class I via ER pathway, TAP-dependent	3	0.223714	0.0621582	TAP2, TAP1, ABCB1	1191	6	16792	7.04954	1	0.743224	69.9755
GOTERM_BP_DIRECT	GO:0002591~positive regulation of antigen processing and presentation of peptide antigen via MHC class I	3	0.223714	0.0621582	TAP2, TAP1, ABCB1	1191	6	16792	7.04954	1	0.743224	69.9755
KEGG_PATHWAY	hsa04917:Prolactin signaling pathway	11	0.820283	0.0629799	PIK3CG, CCND1, TNFRSF11A, GCK, CCND2, SOCS3, GALT, IRF1, SOCS4, STAT1, PIK3R3	568	71	6910	1.88479	1	0.247973	57.608
KEGG_PATHWAY	hsa05412:Arrhythmogenic right ventricular cardiomyopathy (ARVC)	11	0.820283	0.0629799	CACNA2D1, ITGA6, ITGB8, ITGAV, SGCD, LEF1, GJA1, ITGA2, ITGA4, CTNNA3, SGCB	568	71	6910	1.88479	1	0.247973	57.608
GOTERM_BP_DIRECT	GO:0030168~platelet activation	14	1.044	0.0633504	RAP2B, PIK3CG, VAV3, COL3A1, DGKH, GAS6, FZD6, VWF, LCK, ADRA2A, COL1A2, COL1A1, LCP2, SYK	1191	115	16792	1.71641	1	0.748363	70.683
GOTERM_BP_DIRECT	GO:0050731~positive regulation of peptidyl-tyrosine phosphorylation	11	0.820283	0.0637954	FCER1A, CD44, ENPP2, KITLG, SEMA4D, IL6R, HGF, TGFB1, CD74, EHD4, SYK	1191	82	16792	1.89134	1	0.749193	70.9431
GOTERM_BP_DIRECT	GO:0007010~cytoskeleton organization	18	1.34228	0.0641458	FMNL2, CCL3, CCL2, CAP2, FTCD, NEDD9, DPYSL2, SOX9, PALLD, TPM1, THY1, AJUBA, ANK2, SPTBN1, TUBB6, MICAL1, MSN, TUBA1A	1191	161	16792	1.57629	1	0.749485	71.1463
GOTERM_BP_DIRECT	GO:0031667~response to nutrient levels	6	0.447427	0.0647792	SORD, MMP7, CHSY1, SRD5A2, ACACB, PSPH	1191	31	16792	2.72885	1	0.751344	71.5102
GOTERM_CC_DIRECT	GO:0012507~ER to Golgi transport vesicle membrane	8	0.59657	0.064842	HLA-DQB1, HLA-DRB1, HLA-DPA1, HLA-DPB1, CD74, HLA-DQA1, HLA-DRA, HLA-F	1258	52	18224	2.22869	1	0.458911	62.57
KEGG_PATHWAY	hsa02010:ABC transporters	8	0.59657	0.0650032	ABCC9, TAP2, TAP1, ABCC4, ABCC1, ABCB1, CFTR, ABCG2	568	44	6910	2.21191	1	0.251626	58.7999
GOTERM_BP_DIRECT	GO:0001934~positive regulation of protein phosphorylation	15	1.11857	0.0657712	FZD1, GPER1, SOX9, STK4, GAS6, TGFB1, ANXA2, EDNRB, CCND1, CCND2, RASGRP1, SEMA4D, GPNMB, FAM129A, CYR61	1191	127	16792	1.66525	1	0.755124	72.0715
GOTERM_BP_DIRECT	GO:0050718~positive regulation of interleukin-1 beta secretion	5	0.372856	0.0660081	CCL3, PYCARD, CCL19, CASP1, AIM2	1191	22	16792	3.20434	1	0.75477	72.204
GOTERM_BP_DIRECT	GO:0002230~positive regulation of defense response to virus by host	5	0.372856	0.0660081	TRIM6, PYCARD, PTPN22, APOBEC3G, AIM2	1191	22	16792	3.20434	1	0.75477	72.204
GOTERM_CC_DIRECT	GO:0005789~endoplasmic reticulum membrane	72	5.36913	0.0661454	CYP3A4, CYP3A5, TUSC3, CYP3A7, CYP2C19, CYP2D6, PTGS1, DNAJB14, GJA1, RTN1, TLR8, CYP3A43, PTGIS, FITM1, CYP7A1, CH25H, ELOVL2, ATP8B2, ELOVL7, SRD5A2, SCD5, SLC51A, MX1, KDELR3, SGK1, DHRS9, CYP26A1, CYP1A2, GPER1, WLS, LPCAT2, MOXD1, G6PC, DGAT2, PTGDS, PLA2G2A, CYP2A6, SORT1, CYP2A7, PTGFRN, EIF5A2, ERMP1, SLC37A4, IKBIP, CYP2A13, FMO5, TMED3, FMO1, ALOX5AP, BCL2, TAP2, FMO2, RASGRP1, TAP1, MR…	1258	862	18224	1.21001	1	0.460438	63.3275
GOTERM_BP_DIRECT	GO:0032024~positive regulation of insulin secretion	7	0.521999	0.0671608	RBP4, GCK, SOX4, GJA1, PFKM, GPER1, AACS	1191	41	16792	2.40716	1	0.759305	72.8401
GOTERM_CC_DIRECT	GO:0034362~low-density lipoprotein particle	4	0.298285	0.0672762	APOF, APOA5, SORL1, PLA2G7	1258	14	18224	4.139	1	0.461038	63.9731
GOTERM_MF_DIRECT	GO:0046982~protein heterodimerization activity	42	3.13199	0.0672985	CAV2, RBP4, PDGFA, TLR1, SOX4, SOX9, TGFB1, ITGAM, TGFB2, IRAK3, CENPA, BCL2, ADRA2A, SLC51B, SLC51A, TCF4, BHLHE41, TOP2A, IKZF2, CD3G, LIMK2, CD3D, BCL2A1, MLXIPL, ITGA2, MPP7, BIRC5, SLC3A1, HGF, MID1, CAPN2, HOMER2, SMC2, CXCL13, JUN, BAX, HEYL, H2AFY2, CENPW, ADRA1A, GCA, BARD1	1172	465	16881	1.30097	1	0.723577	67.781
GOTERM_BP_DIRECT	GO:0045087~innate immune response	40	2.98285	0.0674543	IGHG1, HMGB2, TLR1, F2RL1, APOBEC3G, C1R, C1S, IGHM, TLR8, APOBEC3B, NLRC5, DDX60, IL1RAP, PYCARD, CLEC4A, CFI, MR1, IGKC, MX1, IGLL5, DEFB1, SYK, HAVCR2, PIK3CG, ITK, LGALS3, LY96, ANXA1, GPER1, IFI16, AIM2, CLEC4M, CD84, LCK, KLRC4-KLRK1, JAK1, CLEC7A, JAK3, PRDM1, IGLC1	1191	430	16792	1.31154	1	0.759241	72.9999
GOTERM_BP_DIRECT	GO:0045471~response to ethanol	13	0.969426	0.067821	RBP4, CDK1, CCL2, TNC, SPARC, TYMS, CCND1, OXCT1, AACS, NQO1, MYC, CD27, GSTP1	1191	105	16792	1.7456	1	0.75956	73.1982
KEGG_PATHWAY	hsa05220:Chronic myeloid leukemia	11	0.820283	0.068042	PIK3CG, CDKN1A, E2F3, CCND1, CTBP2, MDM2, RB1, PIK3R3, MYC, TGFB1, TGFB2	568	72	6910	1.85862	1	0.258601	60.5319
GOTERM_BP_DIRECT	GO:0000902~cell morphogenesis	9	0.671141	0.0703057	CAP2, YAP1, HGF, GREM1, IL7R, ECT2, PTPRO, STK4, TGFB2	1191	62	16792	2.04664	1	0.770665	74.5064
GOTERM_MF_DIRECT	GO:0005540~hyaluronic acid binding	5	0.372856	0.071013	LYVE1, HAPLN4, CD44, VCAN, HMMR	1172	23	16881	3.13121	1	0.738094	69.8048
GOTERM_BP_DIRECT	GO:0001516~prostaglandin biosynthetic process	4	0.298285	0.0718202	PTGIS, PTGDS, PTGS1, CD74	1191	14	16792	4.02831	1	0.776542	75.2739
GOTERM_BP_DIRECT	GO:2000147~positive regulation of cell motility	4	0.298285	0.0718202	EPCAM, CLDN7, CCL21, CCL19	1191	14	16792	4.02831	1	0.776542	75.2739
GOTERM_BP_DIRECT	GO:0010812~negative regulation of cell-substrate adhesion	4	0.298285	0.0718202	COL1A1, PTPRO, FZD7, PLG	1191	14	16792	4.02831	1	0.776542	75.2739
GOTERM_BP_DIRECT	GO:0019079~viral genome replication	4	0.298285	0.0718202	CCL2, CTBP2, GAS6, CLEC4M	1191	14	16792	4.02831	1	0.776542	75.2739
GOTERM_BP_DIRECT	GO:0003382~epithelial cell morphogenesis	4	0.298285	0.0718202	AR, BCL11B, RAB25, PALLD	1191	14	16792	4.02831	1	0.776542	75.2739
GOTERM_BP_DIRECT	GO:0045579~positive regulation of B cell differentiation	4	0.298285	0.0718202	NCKAP1L, PRDM1, CD27, SYK	1191	14	16792	4.02831	1	0.776542	75.2739
GOTERM_CC_DIRECT	GO:0000922~spindle pole	13	0.969426	0.0723998	CKAP2, CDC6, KIF11, NIN, PRC1, NEK2, TPX2, CENPF, NEDD9, CDC20, CCNB1, MAD2L1, MTCL1	1258	109	18224	1.72775	1	0.481458	66.7677
GOTERM_BP_DIRECT	GO:0001974~blood vessel remodeling	6	0.447427	0.0724981	BAX, CCR2, MDM2, SEMA3C, JAG1, TGFB2	1191	32	16792	2.64358	1	0.77826	75.6103
KEGG_PATHWAY	hsa04152:AMPK signaling pathway	16	1.19314	0.0733347	PPP2R1B, PIK3CG, PFKFB3, PFKP, CREB5, CFTR, PFKM, PCK1, G6PC, CCND1, ADRA1A, RHEB, SCD5, PRKAA2, PIK3R3, CCNA2	568	122	6910	1.59547	1	0.27276	63.3888
GOTERM_MF_DIRECT	GO:0005543~phospholipid binding	11	0.820283	0.073698	APOA5, ANXA1, PLA2G2A, PLA2G7, OPHN1, SPTBN1, LPAR1, GRK5, ANXA5, MYOF, SEC14L2	1172	86	16881	1.84232	1	0.746533	71.1927
GOTERM_CC_DIRECT	GO:0005819~spindle	14	1.044	0.0738741	KIF11, PRC1, TPX2, NUSAP1, CENPF, NEDD9, TTK, AURKA, CDC20, BIRC5, RB1, MID1, VRK1, KIF20A	1258	121	18224	1.67612	1	0.483393	67.5336
GOTERM_BP_DIRECT	GO:0051496~positive regulation of stress fiber assembly	7	0.521999	0.0738818	PFN2, PPM1E, CTGF, RGCC, GPR65, LPAR1, TPM1	1191	42	16792	2.34985	1	0.783266	76.2835
GOTERM_MF_DIRECT	GO:0016301~kinase activity	24	1.78971	0.0746206	CDC7, CNKSR2, PIK3CG, FGFR2, CCL3, GNE, PDK4, ATR, CDKN3, CMPK2, CDKN1C, GCKR, CDKN1A, PACSIN3, CDKN2C, CKMT2, LCK, PKLR, BUB1, AKAP7, STK39, ETNK2, PRKAA2, PIK3R3	1172	241	16881	1.43438	1	0.746097	71.6556
GOTERM_BP_DIRECT	GO:0007194~negative regulation of adenylate cyclase activity	5	0.372856	0.0756103	EDNRB, CCR2, ADRA2A, GABBR1, GABBR2	1191	23	16792	3.06502	1	0.789685	77.0997
GOTERM_BP_DIRECT	GO:0033137~negative regulation of peptidyl-serine phosphorylation	5	0.372856	0.0756103	NCK2, BAX, RASSF2, MLXIPL, HGF	1191	23	16792	3.06502	1	0.789685	77.0997
GOTERM_BP_DIRECT	GO:0009617~response to bacterium	5	0.372856	0.0756103	CD47, SERPINB9, CCL2, VIL1, DEFB1	1191	23	16792	3.06502	1	0.789685	77.0997
GOTERM_BP_DIRECT	GO:0001836~release of cytochrome c from mitochondria	5	0.372856	0.0756103	JUN, BAX, BCL2, BCL2A1, IFI6	1191	23	16792	3.06502	1	0.789685	77.0997
GOTERM_MF_DIRECT	GO:0005524~ATP binding	119	8.87397	0.0771873	RNASEL, ADCY1, ADCY7, TTK, AURKA, TTL, PRKX, NLRC5, MAT1A, STK39, SYK, ACSM2B, PIK3CG, MYO6, HKDC1, ACSM2A, NAV3, STK4, ASCC3, NAV2, PDGFRA, YME1L1, FGFR2, KIF4A, PFKFB3, GNE, NEK2, STK17B, STK17A, OAS2, EPHB1, CMPK2, SGK223, IRAK3, VRK1, ENTPD1, RUNX2, HELLS, RUNX3, ITK, ATAD2, ABCB1, ATR, ACACB, ABCG2, EPHA3, P2RX5, GLYCTK, PLK2, ATP2A3, GRK5, FIGNL1, SLFN5, DDX60, ATP8B1, ATP8B2, SIK1, TOP2A, …	1172	1495	16881	1.14651	1	0.753447	72.907
GOTERM_CC_DIRECT	GO:0000139~Golgi membrane	51	3.80313	0.0786582	PDGFA, GJA1, TLR8, ST3GAL1, BLZF1, ST3GAL6, DSEL, PDGFD, KDELR3, PARM1, GBP5, CHST4, GPER1, WLS, LPCAT2, HLA-DQA1, HLA-F, CHST9, ZDHHC13, CHSY1, HLA-DPA1, CTSC, CUX2, GBP4, GBP3, PMEPA1, GBP2, HLA-DRA, GBP1, HLA-DQB1, CAV2, GALNT7, HLA-DRB1, FUT8, CD74, B3GNT5, GNPTAB, TMED3, RASGRP1, FUT4, HLA-DPB1, SRGN, ST6GAL2, FTCD, WIPI1, CD1E, B3GAT1, FAM198B, ST8SIA4, RHEB, ATP8A1	1258	591	18224	1.2501	1	0.500687	69.9071
KEGG_PATHWAY	hsa01230:Biosynthesis of amino acids	11	0.820283	0.0789235	BCAT1, AADAT, NAGS, MAT1A, PKLR, PFKP, PFKM, PSAT1, PSPH, TAT, CBS	568	74	6910	1.80838	1	0.287279	66.1972
GOTERM_CC_DIRECT	GO:0045120~pronucleus	3	0.223714	0.0791545	EZH2, CENPF, AURKA	1258	7	18224	6.20849	1	0.497826	70.1438
GOTERM_CC_DIRECT	GO:0000307~cyclin-dependent protein kinase holoenzyme complex	4	0.298285	0.079936	CDKN1A, CCND1, CCND2, CKS2	1258	15	18224	3.86306	1	0.496321	70.5131
GOTERM_MF_DIRECT	GO:0031726~CCR1 chemokine receptor binding	3	0.223714	0.0799496	CCL3, CCL5, CCL4	1172	7	16881	6.17296	1	0.761297	74.1957
GOTERM_MF_DIRECT	GO:0005114~type II transforming growth factor beta receptor binding	3	0.223714	0.0799496	BAMBI, TGFB1, TGFB2	1172	7	16881	6.17296	1	0.761297	74.1957
GOTERM_MF_DIRECT	GO:0016004~phospholipase activator activity	3	0.223714	0.0799496	CCL3, CCL8, CCL5	1172	7	16881	6.17296	1	0.761297	74.1957
GOTERM_BP_DIRECT	GO:0015758~glucose transport	6	0.447427	0.0806961	EDNRA, G6PC, GCK, SLC2A3, SLC37A4, FABP5	1191	33	16792	2.56347	1	0.810045	79.35
GOTERM_MF_DIRECT	GO:0003678~DNA helicase activity	5	0.372856	0.0807413	MCM2, MCM3, MCM4, MCM5, MCM6	1172	24	16881	3.00075	1	0.760159	74.5543
GOTERM_MF_DIRECT	GO:0005031~tumor necrosis factor-activated receptor activity	5	0.372856	0.0807413	TNFRSF21, TNFRSF11A, TNFRSF19, FAS, CD27	1172	24	16881	3.00075	1	0.760159	74.5543
KEGG_PATHWAY	hsa04350:TGF-beta signaling pathway	12	0.894855	0.0807997	PPP2R1B, SMAD9, ID1, SMURF2, ID4, DCN, THBS1, BAMBI, MYC, TGFB1, BMP5, TGFB2	568	84	6910	1.73793	1	0.289624	67.0944
KEGG_PATHWAY	hsa05322:Systemic lupus erythematosus	17	1.26771	0.0812136	HLA-DQB1, C7, HLA-DRB1, C1R, C1S, HLA-DMB, HLA-DMA, HLA-DQA1, CD86, FCGR1A, H2AFY2, HLA-DPA1, FCGR2A, HLA-DPB1, HLA-DOA, HLA-DOB, HLA-DRA	568	134	6910	1.54338	1	0.28738	67.2893
KEGG_PATHWAY	hsa05142:Chagas disease (American trypanosomiasis)	14	1.044	0.0823064	PPP2R1B, PIK3CG, ADCY1, CCL3, CD3G, CCL2, CD3D, CXCL8, CCL5, TGFB1, TGFB2, JUN, FAS, PIK3R3	568	104	6910	1.63766	1	0.287274	67.7989
GOTERM_BP_DIRECT	GO:0060740~prostate gland epithelium morphogenesis	3	0.223714	0.0830189	AR, TNC, ID4	1191	7	16792	6.04246	1	0.817895	80.3066
GOTERM_BP_DIRECT	GO:0002481~antigen processing and presentation of exogenous protein antigen via MHC class Ib, TAP-dependent	3	0.223714	0.0830189	TAP2, TAP1, ABCB1	1191	7	16792	6.04246	1	0.817895	80.3066
GOTERM_BP_DIRECT	GO:0070233~negative regulation of T cell apoptotic process	3	0.223714	0.0830189	DOCK8, CCL5, CD27	1191	7	16792	6.04246	1	0.817895	80.3066
GOTERM_BP_DIRECT	GO:0051988~regulation of attachment of spindle microtubules to kinetochore	3	0.223714	0.0830189	NEK2, RACGAP1, ECT2	1191	7	16792	6.04246	1	0.817895	80.3066
GOTERM_BP_DIRECT	GO:0072112~glomerular visceral epithelial cell differentiation	3	0.223714	0.0830189	PROM1, CD24, PTPRO	1191	7	16792	6.04246	1	0.817895	80.3066
GOTERM_BP_DIRECT	GO:0060119~inner ear receptor cell development	3	0.223714	0.0830189	GABRB3, ATP8B1, FZD2	1191	7	16792	6.04246	1	0.817895	80.3066
GOTERM_BP_DIRECT	GO:0042908~xenobiotic transport	3	0.223714	0.0830189	NR1I2, ABCB1, ABCG2	1191	7	16792	6.04246	1	0.817895	80.3066
GOTERM_BP_DIRECT	GO:0060710~chorio-allantoic fusion	3	0.223714	0.0830189	LEF1, BMP5, CYR61	1191	7	16792	6.04246	1	0.817895	80.3066
GOTERM_BP_DIRECT	GO:0007435~salivary gland morphogenesis	3	0.223714	0.0830189	TWSG1, TGFB1, TGFB2	1191	7	16792	6.04246	1	0.817895	80.3066
GOTERM_BP_DIRECT	GO:0030913~paranodal junction assembly	3	0.223714	0.0830189	EPB41L3, ANK2, NFASC	1191	7	16792	6.04246	1	0.817895	80.3066
GOTERM_BP_DIRECT	GO:2001259~positive regulation of cation channel activity	3	0.223714	0.0830189	ANK2, ANK3, CTSS	1191	7	16792	6.04246	1	0.817895	80.3066
GOTERM_BP_DIRECT	GO:0014808~release of sequestered calcium ion into cytosol by sarcoplasmic reticulum	3	0.223714	0.0830189	CCL3, CCR5, FKBP1B	1191	7	16792	6.04246	1	0.817895	80.3066
GOTERM_BP_DIRECT	GO:0032532~regulation of microvillus length	3	0.223714	0.0830189	VIL1, CDHR2, CDHR5	1191	7	16792	6.04246	1	0.817895	80.3066
GOTERM_BP_DIRECT	GO:0002606~positive regulation of dendritic cell antigen processing and presentation	3	0.223714	0.0830189	CCL21, CCL19, CD74	1191	7	16792	6.04246	1	0.817895	80.3066
GOTERM_CC_DIRECT	GO:0030666~endocytic vesicle membrane	9	0.671141	0.0831421	HLA-DQB1, HLA-DRB1, MDM2, HLA-DPA1, WLS, HLA-DPB1, CD74, HLA-DQA1, HLA-DRA	1258	66	18224	1.97543	1	0.505567	71.984
GOTERM_MF_DIRECT	GO:0001540~beta-amyloid binding	6	0.447427	0.0832451	BCHE, BACE2, SORL1, CD74, TGFB2, ITM2A	1172	34	16881	2.54181	1	0.766455	75.6579
GOTERM_BP_DIRECT	GO:0022408~negative regulation of cell-cell adhesion	4	0.298285	0.0852198	SPINT2, PODXL, LEF1, TGFB1	1191	15	16792	3.75975	1	0.82492	81.1742
GOTERM_BP_DIRECT	GO:0006271~DNA strand elongation involved in DNA replication	4	0.298285	0.0852198	GINS1, GINS2, RFC3, PCNA	1191	15	16792	3.75975	1	0.82492	81.1742
GOTERM_BP_DIRECT	GO:0006691~leukotriene metabolic process	4	0.298285	0.0852198	CYP4A11, ALOX5AP, ABCC1, ALOX5	1191	15	16792	3.75975	1	0.82492	81.1742
GOTERM_BP_DIRECT	GO:0021854~hypothalamus development	4	0.298285	0.0852198	BAX, LEF1, SRD5A2, MYC	1191	15	16792	3.75975	1	0.82492	81.1742
GOTERM_BP_DIRECT	GO:0030214~hyaluronan catabolic process	4	0.298285	0.0852198	LYVE1, CD44, TGFB1, HMMR	1191	15	16792	3.75975	1	0.82492	81.1742
GOTERM_BP_DIRECT	GO:0030502~negative regulation of bone mineralization	4	0.298285	0.0852198	CCL3, GREM1, SOX9, SRGN	1191	15	16792	3.75975	1	0.82492	81.1742
GOTERM_BP_DIRECT	GO:0051924~regulation of calcium ion transport	5	0.372856	0.0858718	P2RY12, CACNA2D1, ANK2, BCL2, GJA1	1191	24	16792	2.93731	1	0.82598	81.4242
GOTERM_BP_DIRECT	GO:0030866~cortical actin cytoskeleton organization	5	0.372856	0.0858718	EPB41L2, EPB41L3, FMNL2, NCKAP1L, RHOQ	1191	24	16792	2.93731	1	0.82598	81.4242
GOTERM_BP_DIRECT	GO:0070371~ERK1 and ERK2 cascade	5	0.372856	0.0858718	PTGER4, ITGAV, IQGAP3, HTR2B, SOX9	1191	24	16792	2.93731	1	0.82598	81.4242
GOTERM_MF_DIRECT	GO:0008017~microtubule binding	21	1.566	0.0863209	GAS2L3, KIF14, CAPN6, KIF4A, KIF11, PRC1, CRYAB, MAP1B, FTCD, NUSAP1, BIRC5, VPS41, DPYSL2, RACGAP1, MID1, HDGFRP3, MAP2, MTCL1, JAKMIP2, MX1, KIF20A	1172	208	16881	1.45421	1	0.774794	76.9522
KEGG_PATHWAY	hsa00280:Valine, leucine and isoleucine degradation	8	0.59657	0.0866195	BCAT1, ALDH6A1, ACADSB, HMGCS2, ACADS, OXCT1, AOX1, AACS	568	47	6910	2.07072	1	0.296862	69.7394
GOTERM_MF_DIRECT	GO:0030246~carbohydrate binding	20	1.49142	0.0872807	LY75, EMCN, SVEP1, SORD, GALNT7, LGALS3, SELL, LGALS4, CHI3L1, CD72, CLEC11A, CLEC4M, GCKR, CD69, NPTX2, FCN1, KLRC4-KLRK1, CLEC4A, VCAN, CLEC7A	1172	196	16881	1.46975	1	0.774291	77.3426
GOTERM_BP_DIRECT	GO:0006956~complement activation	11	0.820283	0.0874532	IGHG1, C7, IGLV1-44, IGKV1-17, FCN2, RGCC, FCN1, C1R, C1S, IGKC, IGLC1	1191	87	16792	1.78264	1	0.830406	82.0175
GOTERM_BP_DIRECT	GO:0006879~cellular iron ion homeostasis	7	0.521999	0.0884276	TF, TFR2, CYBRD1, HEPH, MYC, ABCG2, FLVCR1	1191	44	16792	2.24303	1	0.832552	82.3741
GOTERM_BP_DIRECT	GO:0010977~negative regulation of neuron projection development	7	0.521999	0.0884276	STMN2, VIM, MDM2, DPYSL3, LPAR1, PMP22, PTPRO	1191	44	16792	2.24303	1	0.832552	82.3741
GOTERM_BP_DIRECT	GO:0034644~cellular response to UV	7	0.521999	0.0884276	BAX, PCNA, RHNO1, PBK, ATR, AQP1, MYC	1191	44	16792	2.24303	1	0.832552	82.3741
GOTERM_CC_DIRECT	GO:0005923~bicellular tight junction	13	0.969426	0.089346	EPCAM, RAP2B, CLDN7, CCND1, CGN, ANK3, YBX3, CLDN10, MPP7, CLDN11, PMP22, ECT2, CLDN14	1258	113	18224	1.66659	1	0.527037	74.6379
GOTERM_BP_DIRECT	GO:0050919~negative chemotaxis	6	0.447427	0.0893652	FLRT2, PDGFA, ITGAV, SEMA3C, SEMA4D, SLIT2	1191	34	16792	2.48807	1	0.834527	82.7109
GOTERM_BP_DIRECT	GO:0097192~extrinsic apoptotic signaling pathway in absence of ligand	6	0.447427	0.0893652	ITGAV, BAX, BCL2, BCL2A1, KITLG, FAS	1191	34	16792	2.48807	1	0.834527	82.7109
GOTERM_BP_DIRECT	GO:0006629~lipid metabolic process	17	1.26771	0.0905453	CYP3A4, PLCXD3, PTGS1, MID1IP1, GPCPD1, LPA, PTGDS, CH25H, APOF, LCAT, JAZF1, OSBPL10, ACSL4, AACS, LIPC, THRSP, FABP5	1191	157	16792	1.52665	1	0.837298	83.1262
GOTERM_BP_DIRECT	GO:0050829~defense response to Gram-negative bacterium	8	0.59657	0.0922426	HMGB2, FCN2, PYCARD, LYZ, MR1, IL6R, IGHM, DEFB1	1191	55	16792	2.05077	1	0.84173	83.7069
GOTERM_CC_DIRECT	GO:0005765~lysosomal membrane	26	1.93885	0.0927893	HLA-DQB1, HLA-DRB1, HLA-DMB, HLA-DMA, CD74, LAPTM5, HPSE, HLA-DPB1, HLA-DOA, HLA-DOB, MYO6, VPS41, CFTR, HLA-DQA1, ANXA2, TMEM55A, ATP6V1C1, LAMP3, TMEM165, RHEB, SORT1, GNB4, HLA-DPA1, TM6SF1, DRAM1, HLA-DRA	1258	274	18224	1.37463	1	0.536164	76.0079
GOTERM_CC_DIRECT	GO:0016010~dystrophin-associated glycoprotein complex	4	0.298285	0.0935376	KRT19, SGCD, SSPN, SGCB	1258	16	18224	3.62162	1	0.534257	76.2964
KEGG_PATHWAY	hsa05206:MicroRNAs in cancer	31	2.31171	0.0936966	SLC45A3, E2F3, PDGFA, TNC, VIM, EZH2, ZEB2, TPM1, MIR21, TGFB2, CCNE2, GLS2, CD44, BCL2, THBS1, MYC, ABCB1, CDKN1A, CCND1, CCND2, MIR34A, GLS, SLC7A1, ST14, PDGFRA, MDM2, ABCC1, MARCKS, ZFPM2, STMN1, MIR155	568	285	6910	1.32326	1	0.314171	72.6907
KEGG_PATHWAY	hsa05202:Transcriptional misregulation in cancer	20	1.49142	0.0937653	SLC45A3, NFKBIZ, ETV7, FUT8, PDGFA, BCL2A1, CXCL8, SPINT1, ITGAM, PROM1, CD86, CDKN1A, FLI1, CDKN2C, CCND2, FCGR1A, ETV1, MDM2, MYC, RUNX2	568	168	6910	1.44827	1	0.310817	72.718
GOTERM_MF_DIRECT	GO:0008093~cytoskeletal adaptor activity	4	0.298285	0.0947749	NCK2, ANK2, ANK3, BICD1	1172	16	16881	3.6009	1	0.798523	80.1848
GOTERM_BP_DIRECT	GO:0010468~regulation of gene expression	12	0.894855	0.096236	CRIP1, G6PC, LBH, FUT8, IL7, BCL2, SORT1, TC2N, CYP1A2, MYC, PHLDA2, CLEC4M	1191	100	16792	1.69189	1	0.853249	84.9995
GOTERM_BP_DIRECT	GO:0030838~positive regulation of actin filament polymerization	7	0.521999	0.0962445	NCK2, PFN2, KIRREL, CCL21, PYCARD, NCKAP1L, CDC42EP3	1191	45	16792	2.19319	1	0.852046	85.0022
GOTERM_MF_DIRECT	GO:0004715~non-membrane spanning protein tyrosine kinase activity	7	0.521999	0.0966247	ITK, SGK223, LCK, JAK1, JAK3, MELK, SYK	1172	46	16881	2.19185	1	0.80097	80.8329
GOTERM_MF_DIRECT	GO:0005080~protein kinase C binding	7	0.521999	0.0966247	DACT1, ITGAV, AVPR1A, MARCKS, GRK5, TOP2A, ADAM9	1172	46	16881	2.19185	1	0.80097	80.8329
GOTERM_BP_DIRECT	GO:0001816~cytokine production	5	0.372856	0.0967698	PIK3CG, ITK, RASGRP1, SLC37A4, FABP4	1191	25	16792	2.81982	1	0.852439	85.1647
GOTERM_BP_DIRECT	GO:0003333~amino acid transmembrane transport	5	0.372856	0.0967698	SLC38A4, SLC16A10, SLC6A6, SLC38A6, SLC6A16	1191	25	16792	2.81982	1	0.852439	85.1647
GOTERM_BP_DIRECT	GO:0046686~response to cadmium ion	5	0.372856	0.0967698	CDK1, SORD, PCNA, HAAO, SPARC	1191	25	16792	2.81982	1	0.852439	85.1647
GOTERM_BP_DIRECT	GO:0002040~sprouting angiogenesis	5	0.372856	0.0967698	E2F8, LEF1, THBS1, LOXL2, RNF213	1191	25	16792	2.81982	1	0.852439	85.1647
GOTERM_BP_DIRECT	GO:0007159~leukocyte cell-cell adhesion	5	0.372856	0.0967698	MSN, ITGA4, CCL5, CLEC4M, SYK	1191	25	16792	2.81982	1	0.852439	85.1647
GOTERM_BP_DIRECT	GO:0050715~positive regulation of cytokine secretion	5	0.372856	0.0967698	CRTAM, PTGER4, RGCC, HTR2B, SYK	1191	25	16792	2.81982	1	0.852439	85.1647
GOTERM_MF_DIRECT	GO:0008083~growth factor activity	17	1.26771	0.0969371	CXCL1, PDGFA, IL7, EFEMP1, CECR1, KITLG, JAG1, HGF, CLEC11A, TGFB1, HDGFRP3, TIMP1, TGFB2, CTGF, PDGFD, GDF15, BMP5	1172	162	16881	1.51149	1	0.798012	80.9404
GOTERM_BP_DIRECT	GO:0048565~digestive tract development	6	0.447427	0.0984953	FGFR2, CCNB1, ITGA6, COL3A1, RB1, TGFB1	1191	35	16792	2.41698	1	0.856448	85.6872
GOTERM_BP_DIRECT	GO:0050918~positive chemotaxis	6	0.447427	0.0984953	CCL3, HMGB2, LGALS3, HGF, CCL5, GPNMB	1191	35	16792	2.41698	1	0.856448	85.6872
GOTERM_BP_DIRECT	GO:0007507~heart development	19	1.41685	0.0985564	RBP4, CRIP1, COL3A1, FBN1, PDLIM3, SOX4, GJA1, BICC1, SPARC, TGFB1, TGFB2, EDNRA, ROBO1, ID1, OXCT1, PCNA, HOPX, HEG1, HTR2B	1191	183	16792	1.46384	1	0.85543	85.7053
GOTERM_BP_DIRECT	GO:0007051~spindle organization	4	0.298285	0.099587	KIF11, TTK, AURKA, ASPM	1191	16	16792	3.52477	1	0.857293	86.0087
GOTERM_BP_DIRECT	GO:0036149~phosphatidylinositol acyl-chain remodeling	4	0.298285	0.099587	PLA2G4A, PLBD1, PLA2G2A, PLA2G5	1191	16	16792	3.52477	1	0.857293	86.0087
GOTERM_BP_DIRECT	GO:0030279~negative regulation of ossification	4	0.298285	0.099587	BCL2, CHSY1, SOX9, TGFB1	1191	16	16792	3.52477	1	0.857293	86.0087
GOTERM_BP_DIRECT	GO:0035458~cellular response to interferon-beta	4	0.298285	0.099587	TRIM6, IRF1, STAT1, AIM2	1191	16	16792	3.52477	1	0.857293	86.0087
GOTERM_BP_DIRECT	GO:0090280~positive regulation of calcium ion import	4	0.298285	0.099587	CCL3, CCL2, LGALS3, STC1	1191	16	16792	3.52477	1	0.857293	86.0087
GOTERM_BP_DIRECT	GO:0003203~endocardial cushion morphogenesis	4	0.298285	0.099587	HEYL, MDM2, SOX9, TGFB2	1191	16	16792	3.52477	1	0.857293	86.0087
GOTERM_BP_DIRECT	GO:0006182~cGMP biosynthetic process	4	0.298285	0.099587	GUCY1A2, GUCY1A3, HTR2B, AQP1	1191	16	16792	3.52477	1	0.857293	86.0087

## Sheet: Common pathways
Category	Term	Count	%	PValue	Genes	List Total	Pop Hits	Pop Total	Fold Enrichment	Bonferroni	Benjamini	FDR
GOTERM_BP_DIRECT	GO:0030198~extracellular matrix organization	26	14.4444	9.52342e-21	PDGFA, LUM, NPNT, COL3A1, DCN, SOX9, SMOC2, ITGB8, COL6A3, LAMB1, LOXL1, SPP1, COL4A4, COL4A3, COL4A2, COL4A1, FBN1, CCDC80, COL5A2, COL5A1, VWF, COL14A1, FBLN5, COL1A2, VCAN, COL1A1	169	196	16792	13.1805	1.09043e-17	1.09043e-17	1.53063e-17
GOTERM_MF_DIRECT	GO:0005201~extracellular matrix structural constituent	17	9.44444	1.42669e-18	COL4A4, COL4A3, COL4A2, COL4A1, LUM, COL3A1, FBN1, COL15A1, CHI3L1, MGP, COL5A2, COL5A1, COL14A1, COL1A2, VCAN, COL1A1, LAMB1	161	67	16881	26.604	4.62248e-16	4.62248e-16	1.92885e-15
GOTERM_CC_DIRECT	GO:0005578~proteinaceous extracellular matrix	26	14.4444	7.17415e-18	CTHRC1, LUM, NPNT, SMOC2, GPC3, WISP1, CTGF, COL6A3, SPON1, DPT, COL4A4, COL4A3, FLRT2, EFEMP1, FBN1, CHI3L1, COL15A1, MGP, COL5A2, COL5A1, VWF, COL14A1, FBLN5, COL1A2, VCAN, ADAMTS2	175	268	18224	10.1029	1.44201e-15	1.44201e-15	8.9994e-15
GOTERM_CC_DIRECT	GO:0031012~extracellular matrix	26	14.4444	7.62315e-17	LUM, IGFBP7, COL3A1, DCN, SERPINE2, COL6A3, LAMB1, LOXL1, THBS2, SPON1, DPT, COL4A2, COL4A1, LGALS3, EFEMP1, FBN1, COL15A1, MGP, COL5A2, COL5A1, VWF, COL14A1, FBLN5, COL1A2, VCAN, COL1A1	175	296	18224	9.14718	2.23155e-14	1.11022e-14	1.44329e-13
GOTERM_CC_DIRECT	GO:0005615~extracellular space	50	27.7778	8.39536e-17	CTHRC1, PDGFA, FAM3B, IGFBP7, GPC3, WISP1, SERPINE2, CTGF, GSN, MS4A1, SEMA3C, LOXL4, PDGFD, LOXL1, GOLM1, SPON1, CTSK, PTGDS, CPE, TACSTD2, COL1A2, VCAN, COL1A1, ENPP2, LUM, COL3A1, IL32, DCN, CXCL6, GPRC5B, CCL20, COL6A3, LAMB1, SPP1, DPT, FLRT2, LGALS3, PODXL, FBN1, EFEMP1, COL15A1, CHI3L1, CCL19, DPYSL3, FRZB, MCAM, PROM1, DKK3, COL14A1, FBLN5	175	1347	18224	3.86552	2.23155e-14	7.43849e-15	1.44329e-13
GOTERM_BP_DIRECT	GO:0007155~cell adhesion	30	16.6667	1.73691e-15	IGFBP7, IL32, CLDN10, ITGBL1, SRPX, WISP1, ITGB8, CTGF, ROBO1, FAT1, COL6A3, CD24, LAMB1, THBS2, SPP1, DPT, SPON1, COL4A3, PODXL, COL15A1, CHST4, MCAM, SSPN, COL5A1, THY1, EPHA3, VWF, VCAN, COL1A1, CDH11	169	459	16792	6.49418	2.03393e-12	1.01696e-12	2.85327e-12
GOTERM_CC_DIRECT	GO:0005576~extracellular region	50	27.7778	1.10402e-13	ENPP5, C7, CNDP1, PDGFA, LUM, IGFBP7, NPNT, FAM3B, COL3A1, GABBR1, JAG1, DCN, CXCL6, ITGBL1, SERPINE2, CCL20, CTGF, GSN, COL6A3, PDGFD, FAM150B, LAMB1, LOXL1, THBS2, CRIM1, SPP1, COL4A4, COL4A3, COL4A2, COL4A1, EFEMP1, FBN1, COL15A1, CCL19, FRZB, COL5A2, COL5A1, PCOLCE2, EPHA3, DKK3, VWF, CTSK, COL14A1, PTGDS, CHST9, FBLN5, COL1A2, VCAN, COL1A1, ADAMTS2	175	1610	18224	3.23407	2.21816e-11	5.54534e-12	1.38434e-10
KEGG_PATHWAY	hsa04512:ECM-receptor interaction	15	8.33333	1.3344e-12	COL4A4, COL4A3, COL4A2, COL4A1, COL3A1, COL5A2, COL5A1, VWF, ITGB8, COL6A3, COL1A2, COL1A1, LAMB1, THBS2, SPP1	85	87	6910	14.0162	1.97488e-10	1.97488e-10	1.58976e-09
GOTERM_BP_DIRECT	GO:0030574~collagen catabolic process	13	7.22222	1.41687e-12	COL4A4, COL4A3, COL4A2, CTSK, COL4A1, COL3A1, COL6A3, COL1A2, COL15A1, COL1A1, ADAMTS2, COL5A2, COL5A1	169	64	16792	20.1827	1.62231e-09	5.40771e-10	2.27722e-09
GOTERM_CC_DIRECT	GO:0070062~extracellular exosome	63	35	3.89089e-11	S100A6, IGFBP7, FAM3B, NPNT, AQP1, EPCAM, GPC3, GSN, MS4A1, SEMA3C, LOXL4, PDGFD, FAM129A, GOLM1, CRYAB, MGP, CFTR, PCOLCE2, THY1, DHRS2, PTGDS, CPE, TACSTD2, AKR1B10, CLIC6, CYBRD1, COL1A2, SLC38A1, FXYD2, C7, LUM, CLDN11, GPRC5B, ITM2A, HSPA2, ITGB8, FAT1, KRT7, COL6A3, LAMB1, CRIM1, DPT, SPP1, FLRT2, CACNA2D1, COL4A2, SLC12A2, LGALS3, PODXL, FBN1, EFEMP1, CHI3L1, COL15A1, COL5A1, PROM1, THSD7A…	175	2811	18224	2.33392	7.82068e-09	1.56414e-09	4.88081e-08
KEGG_PATHWAY	hsa04510:Focal adhesion	18	10	2.63718e-10	COL4A4, COL4A3, COL4A2, COL4A1, PDGFA, COL3A1, COL5A2, COL5A1, VWF, ITGB8, COL6A3, PDGFRA, COL1A2, PDGFD, COL1A1, LAMB1, THBS2, SPP1	85	206	6910	7.10337	3.90302e-08	1.95151e-08	3.14191e-07
GOTERM_MF_DIRECT	GO:0048407~platelet-derived growth factor binding	7	3.88889	2.93171e-10	COL4A1, PDGFA, COL3A1, PDGFRA, COL1A2, COL1A1, COL5A1	161	11	16881	66.7233	9.49873e-08	4.74936e-08	3.9636e-07
KEGG_PATHWAY	hsa04974:Protein digestion and absorption	13	7.22222	4.52782e-10	COL4A4, COL4A3, FXYD2, COL4A2, COL4A1, COL3A1, COL15A1, COL5A2, COL5A1, COL14A1, COL6A3, COL1A2, COL1A1	85	88	6910	12.0094	6.70117e-08	2.23372e-08	5.39441e-07
GOTERM_BP_DIRECT	GO:0030199~collagen fibril organization	9	5	4.01295e-09	COL14A1, LUM, COL3A1, COL1A2, COL1A1, ADAMTS2, COL5A2, COL5A1, DPT	169	39	16792	22.9294	4.59482e-06	1.14871e-06	6.44973e-06
GOTERM_CC_DIRECT	GO:0005788~endoplasmic reticulum lumen	15	8.33333	4.63261e-09	COL4A4, COL4A3, COL4A2, COL14A1, COL4A1, PDGFA, COL3A1, COL6A3, COL1A2, COL15A1, COL1A1, PDGFD, COL5A2, COL5A1, SPON1	175	192	18224	8.13571	9.31155e-07	1.55193e-07	5.81124e-06
GOTERM_CC_DIRECT	GO:0005581~collagen trimer	11	6.11111	1.78333e-08	COL4A4, COL4A3, CTHRC1, COL14A1, COL3A1, COL6A3, COL1A2, COL15A1, COL1A1, COL5A2, COL5A1	175	92	18224	12.4512	3.58448e-06	5.1207e-07	2.23704e-05
GOTERM_CC_DIRECT	GO:0005604~basement membrane	10	5.55556	6.21689e-08	COL4A3, SMOC2, COL4A1, NPNT, FBN1, CCDC80, LAMB1, THBS2, LOXL1, COL5A1	175	79	18224	13.1819	1.24959e-05	1.56199e-06	7.79859e-05
KEGG_PATHWAY	hsa04151:PI3K-Akt signaling pathway	19	10.5556	1.10685e-07	COL4A4, COL4A3, COL4A2, COL4A1, PDGFA, COL3A1, COL5A2, COL5A1, VWF, ITGB8, COL6A3, PDGFRA, COL1A2, COL1A1, PRKAA2, PDGFD, LAMB1, THBS2, SPP1	85	345	6910	4.47707	1.63812e-05	4.09532e-06	0.000131869
GOTERM_MF_DIRECT	GO:0005178~integrin binding	10	5.55556	6.80947e-07	COL4A3, VWF, WISP1, CTGF, FBLN5, NPNT, COL3A1, FBN1, COL5A1, THY1	161	105	16881	9.9858	0.000220603	7.35396e-05	0.00092062
GOTERM_MF_DIRECT	GO:0005518~collagen binding	8	4.44444	1.52634e-06	VWF, CTSK, COL14A1, PDGFA, LUM, DCN, ANTXR1, PCOLCE2	161	60	16881	13.9801	0.000494412	0.000123626	0.00206356
KEGG_PATHWAY	hsa05146:Amoebiasis	10	5.55556	4.7264e-06	COL4A4, COL4A3, COL4A2, COL4A1, COL3A1, COL1A2, COL1A1, LAMB1, COL5A2, COL5A1	85	106	6910	7.66926	0.000699264	0.000139892	0.00563085
GOTERM_BP_DIRECT	GO:0001501~skeletal system development	10	5.55556	9.71489e-06	COL3A1, FBN1, COL1A2, SOX4, VCAN, COL1A1, FRZB, SOX9, COL5A2, CDH11	169	137	16792	7.25262	0.011062	0.00222225	0.0156129
GOTERM_CC_DIRECT	GO:0005587~collagen type IV trimer	4	2.22222	1.67531e-05	COL4A4, COL4A3, COL4A2, COL4A1	175	6	18224	69.4248	0.00336174	0.000374086	0.0210134
GOTERM_MF_DIRECT	GO:0008201~heparin binding	10	5.55556	2.19163e-05	SMOC2, WISP1, SERPINE2, CTGF, FBN1, CCDC80, CXCL6, THBS2, COL5A1, PCOLCE2	161	160	16881	6.55318	0.00707581	0.00141918	0.0296263
GOTERM_BP_DIRECT	GO:0071230~cellular response to amino acid stimulus	6	3.33333	0.000103133	COL4A1, COL3A1, COL1A2, PDGFD, COL1A1, COL5A2	169	47	16792	12.6844	0.111387	0.0194897	0.165629
GOTERM_BP_DIRECT	GO:0043588~skin development	5	2.77778	0.000354698	PDGFA, COL3A1, ADAMTS2, COL5A2, COL5A1	169	34	16792	14.6119	0.333824	0.0563771	0.568559
GOTERM_BP_DIRECT	GO:0070374~positive regulation of ERK1 and ERK2 cascade	9	5	0.000382769	CCL20, PDGFA, CTGF, NPNT, PDGFRA, CHI3L1, CCL19, PDGFD, FAM150B	169	175	16792	5.10999	0.354903	0.0533202	0.613427
GOTERM_MF_DIRECT	GO:0005520~insulin-like growth factor binding	4	2.22222	0.000614152	WISP1, CTGF, IGFBP7, CRIM1	161	18	16881	23.3002	0.180488	0.0326302	0.827134
GOTERM_CC_DIRECT	GO:0009986~cell surface	15	8.33333	0.000721741	PDGFA, CRYAB, CFTR, GPRC5B, PROM1, EPCAM, SRPX, HSPA2, ROBO1, ITGB8, ANK3, BACE2, KCNN2, ANTXR1, CD24	175	542	18224	2.88202	0.135084	0.0144074	0.901604
GOTERM_BP_DIRECT	GO:0030334~regulation of cell migration	6	3.33333	0.000871778	SERPINE2, ENPP2, DPYSL3, JAG1, NEXN, THY1	169	74	16792	8.05629	0.631613	0.105024	1.39198
GOTERM_CC_DIRECT	GO:0030018~Z disc	7	3.88889	0.00094754	CRYAB, ANK3, KCNN2, SYNPO2, NEXN, PALLD, HOMER1	175	118	18224	6.17763	0.173492	0.0171732	1.18213
GOTERM_BP_DIRECT	GO:0001558~regulation of cell growth	6	3.33333	0.00123996	FXYD2, WISP1, CTGF, FBLN5, IGFBP7, CRIM1	169	80	16792	7.45207	0.75844	0.132434	1.97439
GOTERM_BP_DIRECT	GO:0001503~ossification	6	3.33333	0.00123996	CTGF, MGP, SOX9, COL5A2, SPP1, CDH11	169	80	16792	7.45207	0.75844	0.132434	1.97439
GOTERM_BP_DIRECT	GO:0071560~cellular response to transforming growth factor beta stimulus	5	2.77778	0.0014424	COL4A2, FBN1, PDGFD, COL1A1, SOX9	169	49	16792	10.1389	0.808477	0.139507	2.29324
GOTERM_BP_DIRECT	GO:0038063~collagen-activated tyrosine kinase receptor signaling pathway	3	1.66667	0.00145366	COL4A3, COL4A2, COL4A1	169	6	16792	49.6805	0.810933	0.129602	2.31095
GOTERM_CC_DIRECT	GO:0016323~basolateral plasma membrane	8	4.44444	0.00173661	KCNJ16, EPCAM, FXYD2, ANK3, ABCC4, HEPH, CFTR, AQP1	175	180	18224	4.62832	0.294862	0.0286938	2.15673
GOTERM_BP_DIRECT	GO:0016477~cell migration	8	4.44444	0.00173865	CTHRC1, CTGF, FAT1, PODXL, CD24, PALLD, COL5A1, EPHA3	169	172	16792	4.62144	0.863644	0.1421	2.75809
GOTERM_BP_DIRECT	GO:0006633~fatty acid biosynthetic process	5	2.77778	0.00180074	ACSM3, CH25H, ELOVL7, PRKAA2, SCD5	169	52	16792	9.55394	0.873017	0.137058	2.85525
GOTERM_BP_DIRECT	GO:0048146~positive regulation of fibroblast proliferation	5	2.77778	0.00207127	S100A6, PDGFA, PDGFRA, PDGFD, AQP1	169	54	16792	9.20009	0.906898	0.146381	3.27754
GOTERM_MF_DIRECT	GO:0005198~structural molecule activity	9	5	0.00248358	COL4A3, KRT7, MAP2, MAP1B, COL15A1, CLDN10, CLDN11, JAG1, LAMB1	161	247	16881	3.82048	0.553216	0.108721	3.30603
GOTERM_BP_DIRECT	GO:0030335~positive regulation of cell migration	8	4.44444	0.0025454	PDGFA, PODXL, PDGFRA, SEMA3C, PDGFD, COL1A1, MCAM, LAMB1	169	184	16792	4.32004	0.945969	0.166722	4.01349
GOTERM_BP_DIRECT	GO:0051216~cartilage development	5	2.77778	0.00286788	TYMS, ITGB8, LUM, CHI3L1, SOX9	169	59	16792	8.42042	0.962688	0.175879	4.51105
GOTERM_BP_DIRECT	GO:0030203~glycosaminoglycan metabolic process	4	2.22222	0.00296901	GPC3, CHST9, VCAN, DCN	169	29	16792	13.705	0.966779	0.172332	4.66658
GOTERM_MF_DIRECT	GO:0005509~calcium ion binding	16	8.88889	0.00340518	S100A6, ENPP2, RASEF, NPNT, FBN1, EFEMP1, MGP, JAG1, SMOC2, GSN, SLC25A24, FAT1, FBLN5, VCAN, THBS2, CDH11	161	717	16881	2.33977	0.668843	0.129028	4.50686
GOTERM_BP_DIRECT	GO:0014068~positive regulation of phosphatidylinositol 3-kinase signaling	5	2.77778	0.00407334	PDGFA, PDGFRA, PDGFD, DCN, SOX9	169	65	16792	7.64315	0.99066	0.218057	6.3496
GOTERM_BP_DIRECT	GO:0060174~limb bud formation	3	1.66667	0.00424763	SOX4, SEMA3C, SOX9	169	10	16792	29.8083	0.992356	0.216273	6.61267
GOTERM_BP_DIRECT	GO:0001775~cell activation	3	1.66667	0.00515755	PDGFA, PDGFRA, CD24	169	11	16792	27.0984	0.997317	0.245679	7.97483
GOTERM_BP_DIRECT	GO:0071300~cellular response to retinoic acid	5	2.77778	0.00530812	COL1A1, SOX9, AQP1, FZD7, EPHA3	169	70	16792	7.09721	0.997744	0.241945	8.19843
GOTERM_BP_DIRECT	GO:0001568~blood vessel development	4	2.22222	0.00641895	COL1A2, COL1A1, ANTXR1, COL5A1	169	38	16792	10.459	0.999372	0.274274	9.83238
GOTERM_BP_DIRECT	GO:0022617~extracellular matrix disassembly	5	2.77778	0.00709279	CTSK, GSN, FBN1, DCN, SPP1	169	76	16792	6.5369	0.999711	0.287939	10.8102
GOTERM_BP_DIRECT	GO:0003215~cardiac right ventricle morphogenesis	3	1.66667	0.00721895	SOX4, SEMA3C, JAG1	169	13	16792	22.9294	0.99975	0.282389	10.9922
GOTERM_BP_DIRECT	GO:0001525~angiogenesis	8	4.44444	0.00723956	THSD7A, COL4A2, PDGFA, CTGF, COL15A1, JAG1, MCAM, THY1	169	223	16792	3.56452	0.999756	0.273835	11.0219
GOTERM_CC_DIRECT	GO:0031091~platelet alpha granule	3	1.66667	0.00764912	VWF, SERPINE2, THBS2	175	14	18224	22.3151	0.786343	0.111945	9.18275
GOTERM_BP_DIRECT	GO:0042060~wound healing	5	2.77778	0.00847939	CCL20, PDGFA, COL3A1, PDGFRA, DCN	169	80	16792	6.21006	0.999942	0.303106	12.7911
GOTERM_MF_DIRECT	GO:0005161~platelet-derived growth factor receptor binding	3	1.66667	0.00864472	PDGFA, PDGFRA, PDGFD	161	15	16881	20.9702	0.939979	0.26843	11.0755
GOTERM_CC_DIRECT	GO:0042383~sarcolemma	5	2.77778	0.00892276	ANK3, COL6A3, SSPN, AQP1, DTNA	175	85	18224	6.12571	0.834953	0.120745	10.6341
KEGG_PATHWAY	hsa04976:Bile secretion	5	2.77778	0.00964974	FXYD2, KCNN2, ABCC4, CFTR, AQP1	85	69	6910	5.89088	0.761908	0.212729	10.9101
GOTERM_CC_DIRECT	GO:0005886~plasma membrane	54	30	0.00991015	KCNJ16, ENAH, GABRB3, GABBR1, JAG1, AQP1, EPCAM, GPC3, ANK3, CTGF, ROBO1, GSN, NALCN, FAM129A, CFTR, PALLD, THY1, CPE, CLIC6, CYBRD1, PDGFRA, SLC38A1, PMEPA1, ENPP5, FXYD2, ENPP2, CLDN10, CLDN11, GPRC5B, PAQR5, ITM2A, ITGB8, FAT1, SNAP25, CRIM1, FLRT2, CACNA2D1, CAP2, SLC12A2, LGALS3, PODXL, MAP1B, MCAM, FZD7, EPHA3, RASSF3, THSD7A, PROM1, RGS4, KCNN2, ABCC4, HEPH, ANTXR1, CDH11	175	4121	18224	1.36457	0.864918	0.124936	11.7446
GOTERM_BP_DIRECT	GO:0010976~positive regulation of neuron projection development	5	2.77778	0.012219	STMN2, DPYSL3, FAM150B, GPRC5B, EPHA3	169	89	16792	5.58208	0.999999	0.395134	17.9299
GOTERM_MF_DIRECT	GO:0005539~glycosaminoglycan binding	3	1.66667	0.0123647	SERPINE2, VCAN, DCN	161	18	16881	17.4752	0.982246	0.331763	15.4823
GOTERM_BP_DIRECT	GO:0007160~cell-matrix adhesion	5	2.77778	0.01269	ITGB8, CTGF, FBLN5, NPNT, COL3A1	169	90	16792	5.52005	1	0.396037	18.5566
GOTERM_MF_DIRECT	GO:0005507~copper ion binding	4	2.22222	0.0160522	HEPH, LOXL4, LOXL1, MOXD1	161	56	16881	7.48935	0.994716	0.379138	19.6504
GOTERM_BP_DIRECT	GO:0016337~single organismal cell-cell adhesion	5	2.77778	0.0186459	COL14A1, FAT1, CD24, SOX9, THY1	169	101	16792	4.91886	1	0.512454	26.104
GOTERM_CC_DIRECT	GO:0030027~lamellipodium	6	3.33333	0.0188241	ENAH, STMN2, FAT1, PODXL, DPYSL3, PALLD	175	160	18224	3.90514	0.978066	0.212374	21.21
GOTERM_CC_DIRECT	GO:0005584~collagen type I trimer	2	1.11111	0.0190051	COL1A2, COL1A1	175	2	18224	104.137	0.978864	0.202975	21.3921
KEGG_PATHWAY	hsa05222:Small cell lung cancer	5	2.77778	0.0195379	COL4A4, COL4A3, COL4A2, COL4A1, LAMB1	85	85	6910	4.78201	0.946079	0.341095	20.949
GOTERM_BP_DIRECT	GO:0072139~glomerular parietal epithelial cell differentiation	2	1.11111	0.01991	PROM1, CD24	169	2	16792	99.3609	1	0.524223	27.6191
GOTERM_BP_DIRECT	GO:1903225~negative regulation of endodermal cell differentiation	2	1.11111	0.01991	COL5A2, COL5A1	169	2	16792	99.3609	1	0.524223	27.6191
GOTERM_CC_DIRECT	GO:0030424~axon	7	3.88889	0.0199585	ROBO1, STMN2, CRYAB, SLC38A1, PALLD, HOMER1, DTNA	175	222	18224	3.2836	0.982616	0.201583	22.3451
GOTERM_BP_DIRECT	GO:0001502~cartilage condensation	3	1.66667	0.0201582	CTGF, MGP, SOX9	169	22	16792	13.5492	1	0.517443	27.9132
GOTERM_BP_DIRECT	GO:0090103~cochlea morphogenesis	3	1.66667	0.0201582	CTHRC1, FRZB, SOX9	169	22	16792	13.5492	1	0.517443	27.9132
KEGG_PATHWAY	hsa04611:Platelet activation	6	3.33333	0.0206309	VWF, COL3A1, COL1A2, COL1A1, COL5A2, COL5A1	85	130	6910	3.75204	0.954284	0.32	21.9925
GOTERM_CC_DIRECT	GO:0016324~apical plasma membrane	8	4.44444	0.0219146	EPCAM, PROM1, SLC12A2, PODXL, CFTR, JAG1, AQP1, THY1	175	291	18224	2.86288	0.988366	0.208964	24.2672
GOTERM_BP_DIRECT	GO:0045669~positive regulation of osteoblast differentiation	4	2.22222	0.0222042	CTHRC1, NPNT, ID4, JAG1	169	60	16792	6.62406	1	0.541181	30.2947
GOTERM_BP_DIRECT	GO:0090090~negative regulation of canonical Wnt signaling pathway	6	3.33333	0.0240686	CTHRC1, DKK3, GPC3, BICC1, FRZB, SOX9	169	163	16792	3.65746	1	0.559771	32.4005
GOTERM_BP_DIRECT	GO:0016525~negative regulation of angiogenesis	4	2.22222	0.0241894	COL4A3, COL4A2, DCN, THBS2	169	62	16792	6.41038	1	0.551151	32.5348
GOTERM_BP_DIRECT	GO:0071356~cellular response to tumor necrosis factor	5	2.77778	0.0246224	CCL20, NPNT, CHI3L1, CCL19, COL1A1	169	110	16792	4.51641	1	0.547483	33.0143
GOTERM_MF_DIRECT	GO:0008395~steroid hydroxylase activity	3	1.66667	0.0250003	CYP3A7, CYP2C19, CH25H	161	26	16881	12.0982	0.999726	0.495198	28.9861
GOTERM_MF_DIRECT	GO:0001968~fibronectin binding	3	1.66667	0.0250003	CTSK, CTGF, CCDC80	161	26	16881	12.0982	0.999726	0.495198	28.9861
GOTERM_CC_DIRECT	GO:0030426~growth cone	5	2.77778	0.0251801	STMN2, DPYSL3, PALLD, SNAP25, THY1	175	116	18224	4.48867	0.99406	0.22609	27.3785
GOTERM_BP_DIRECT	GO:0007568~aging	6	3.33333	0.0253598	TYMS, SLC12A2, CTGF, CRYAB, COL3A1, DCN	169	165	16792	3.61313	1	0.548376	33.8236
GOTERM_BP_DIRECT	GO:0030206~chondroitin sulfate biosynthetic process	3	1.66667	0.0256738	CHST9, VCAN, DCN	169	25	16792	11.9233	1	0.543285	34.1655
GOTERM_BP_DIRECT	GO:0060326~cell chemotaxis	4	2.22222	0.0273416	CCL20, PDGFRA, CCL19, CXCL6	169	65	16792	6.11452	1	0.556873	35.9535
GOTERM_BP_DIRECT	GO:0061098~positive regulation of protein tyrosine kinase activity	3	1.66667	0.0276333	CD24, FAM150B, GPRC5B	169	26	16792	11.4647	1	0.551631	36.2616
GOTERM_CC_DIRECT	GO:0005589~collagen type VI trimer	2	1.11111	0.0283725	COL6A3, DCN	175	3	18224	69.4248	0.996928	0.240802	30.306
GOTERM_CC_DIRECT	GO:0005588~collagen type V trimer	2	1.11111	0.0283725	COL5A2, COL5A1	175	3	18224	69.4248	0.996928	0.240802	30.306
GOTERM_CC_DIRECT	GO:0005887~integral component of plasma membrane	22	12.2222	0.0289058	KCNJ16, FLRT2, GABRB3, SLC12A2, ENPP2, PODXL, GABBR1, JAG1, SSPN, AQP1, EPHA3, THY1, PROM1, EPCAM, GPC3, ROBO1, TACSTD2, FAT1, MS4A1, PDGFRA, SLC38A1, GOLM1	175	1415	18224	1.61909	0.997249	0.235081	30.7844
GOTERM_BP_DIRECT	GO:0042476~odontogenesis	3	1.66667	0.0296511	COL1A2, AQP1, LAMB1	169	27	16792	11.0401	1	0.568542	38.3544
GOTERM_BP_DIRECT	GO:0048592~eye morphogenesis	2	1.11111	0.0297168	COL5A2, COL5A1	169	3	16792	66.2406	1	0.560631	38.4214
GOTERM_BP_DIRECT	GO:2000768~positive regulation of nephron tubule epithelial cell differentiation	2	1.11111	0.0297168	PROM1, CD24	169	3	16792	66.2406	1	0.560631	38.4214
KEGG_PATHWAY	hsa04964:Proximal tubule bicarbonate reclamation	3	1.66667	0.031317	FXYD2, GLS, AQP1	85	23	6910	10.6036	0.990987	0.407395	31.5507
GOTERM_BP_DIRECT	GO:0007528~neuromuscular junction development	3	1.66667	0.0317257	COL4A1, ANK3, PDZRN3	169	28	16792	10.6458	1	0.576194	40.4389
GOTERM_BP_DIRECT	GO:0030855~epithelial cell differentiation	4	2.22222	0.0330577	COL4A1, LGALS3, TAGLN, EHF	169	70	16792	5.67777	1	0.583051	41.7423
GOTERM_CC_DIRECT	GO:0009925~basal plasma membrane	3	1.66667	0.0331015	TACSTD2, ANK3, AQP1	175	30	18224	10.4137	0.998848	0.254854	34.4437
GOTERM_BP_DIRECT	GO:0048008~platelet-derived growth factor receptor signaling pathway	3	1.66667	0.0338558	PDGFA, PDGFRA, PDGFD	169	29	16792	10.2787	1	0.583705	42.5103
GOTERM_BP_DIRECT	GO:0071347~cellular response to interleukin-1	4	2.22222	0.0342699	CCL20, CHI3L1, CCL19, SOX9	169	71	16792	5.5978	1	0.580202	42.905
GOTERM_CC_DIRECT	GO:0005925~focal adhesion	9	5	0.0343911	FLRT2, ENAH, GSN, FAT1, SYNPO2, NEXN, MCAM, PALLD, THY1	175	391	18224	2.39702	0.999119	0.254048	35.532
GOTERM_MF_DIRECT	GO:0017147~Wnt-protein binding	3	1.66667	0.0346887	CTHRC1, FRZB, FZD7	161	31	16881	10.1469	0.999989	0.585176	37.955
GOTERM_BP_DIRECT	GO:0055114~oxidation-reduction process	12	6.66667	0.0359103	DHRS2, CYP2C19, CH25H, AKR1B10, CYBRD1, ABCC4, HEPH, LOXL4, SCD5, LOXL1, MOXD1, MSRB3	169	592	16792	2.01407	1	0.589726	44.444
GOTERM_MF_DIRECT	GO:0030674~protein binding, bridging	4	2.22222	0.0367207	FLRT2, COL14A1, ANK3, COL1A2	161	77	16881	5.4468	0.999995	0.579293	39.6977
GOTERM_BP_DIRECT	GO:0048050~post-embryonic eye morphogenesis	2	1.11111	0.0394259	EFEMP1, FBN1	169	4	16792	49.6805	1	0.616921	47.6121
GOTERM_BP_DIRECT	GO:0016055~Wnt signaling pathway	6	3.33333	0.0397276	DKK3, WISP1, CPE, PRKAA2, CD24, FRZB	169	187	16792	3.18805	1	0.612202	47.8759
GOTERM_BP_DIRECT	GO:0030324~lung development	4	2.22222	0.0406715	GPC3, CTGF, CHI3L1, ADAMTS2	169	76	16792	5.22952	1	0.613587	48.6933
GOTERM_BP_DIRECT	GO:0007267~cell-cell signaling	7	3.88889	0.0424977	WISP1, CCL20, PDGFA, CTGF, FAT1, CHST4, CXCL6	169	254	16792	2.73829	1	0.622801	50.2407
GOTERM_BP_DIRECT	GO:0050919~negative chemotaxis	3	1.66667	0.0452944	FLRT2, PDGFA, SEMA3C	169	34	16792	8.76714	1	0.639636	52.526
GOTERM_MF_DIRECT	GO:0030023~extracellular matrix constituent conferring elasticity	2	1.11111	0.0465061	COL4A1, FBN1	161	5	16881	41.9404	1	0.642507	47.4729
GOTERM_MF_DIRECT	GO:0016641~oxidoreductase activity, acting on the CH-NH2 group of donors, oxygen as acceptor	2	1.11111	0.0465061	LOXL4, LOXL1	161	5	16881	41.9404	1	0.642507	47.4729
GOTERM_CC_DIRECT	GO:0043202~lysosomal lumen	4	2.22222	0.0478584	GPC3, LUM, VCAN, DCN	175	85	18224	4.90057	0.999948	0.325844	45.946
GOTERM_MF_DIRECT	GO:0030165~PDZ domain binding	4	2.22222	0.0483447	CFTR, FZD7, CRIM1, DTNA	161	86	16881	4.87679	1	0.633383	48.8259
GOTERM_BP_DIRECT	GO:0015696~ammonium transport	2	1.11111	0.0490386	SLC12A2, AQP1	169	5	16792	39.7444	1	0.662529	55.4315
GOTERM_BP_DIRECT	GO:0032387~negative regulation of intracellular transport	2	1.11111	0.0490386	CRYAB, MAP1B	169	5	16792	39.7444	1	0.662529	55.4315
GOTERM_BP_DIRECT	GO:0006813~potassium ion transport	4	2.22222	0.0490907	KCNJ16, SLC12A2, KCNN2, AQP1	169	82	16792	4.84688	1	0.656072	55.4707
GOTERM_MF_DIRECT	GO:0003779~actin binding	7	3.88889	0.049312	ENAH, CAP2, TAGLN, GSN, SYNPO2, TPM2, PALLD	161	278	16881	2.64013	1	0.618556	49.5246
GOTERM_CC_DIRECT	GO:0045211~postsynaptic membrane	6	3.33333	0.0518295	GABRB3, ANK3, GABBR1, SSPN, HOMER1, KCTD12	175	211	18224	2.96125	0.999977	0.337304	48.7069
GOTERM_BP_DIRECT	GO:0034446~substrate adhesion-dependent cell spreading	3	1.66667	0.0553172	ANTXR1, LAMB1, FZD7	169	38	16792	7.84429	1	0.694156	59.9327
GOTERM_BP_DIRECT	GO:0010811~positive regulation of cell-substrate adhesion	3	1.66667	0.0553172	SMOC2, NPNT, CCDC80	169	38	16792	7.84429	1	0.694156	59.9327
GOTERM_CC_DIRECT	GO:0043209~myelin sheath	5	2.77778	0.0580836	HSPA2, CRYAB, CLDN11, SNAP25, THY1	175	152	18224	3.42556	0.999994	0.359475	52.7931
GOTERM_BP_DIRECT	GO:0001957~intramembranous ossification	2	1.11111	0.0585555	CTSK, COL1A1	169	6	16792	33.1203	1	0.708797	62.0841
GOTERM_BP_DIRECT	GO:0032964~collagen biosynthetic process	2	1.11111	0.0585555	COL1A1, COL5A1	169	6	16792	33.1203	1	0.708797	62.0841
GOTERM_BP_DIRECT	GO:0042985~negative regulation of amyloid precursor protein biosynthetic process	2	1.11111	0.0585555	BACE2, ITM2A	169	6	16792	33.1203	1	0.708797	62.0841
GOTERM_BP_DIRECT	GO:0006955~immune response	9	5	0.0613689	C7, CCL20, ENPP2, CCL19, SEMA3C, IL32, CHST4, GEM, CXCL6	169	421	16792	2.12411	1	0.719788	63.8647
GOTERM_MF_DIRECT	GO:0046332~SMAD binding	3	1.66667	0.0626118	COL3A1, COL1A2, COL5A2	161	43	16881	7.31518	1	0.687715	58.2787
GOTERM_CC_DIRECT	GO:0005796~Golgi lumen	4	2.22222	0.0642585	GPC3, LUM, VCAN, DCN	175	96	18224	4.33905	0.999998	0.379216	56.5316
GOTERM_MF_DIRECT	GO:0008519~ammonium transmembrane transporter activity	2	1.11111	0.0645009	SLC12A2, AQP1	161	7	16881	29.9574	1	0.679216	59.4012
GOTERM_BP_DIRECT	GO:0009653~anatomical structure morphogenesis	4	2.22222	0.0648426	DKK3, GPC3, FAT1, MCAM	169	92	16792	4.32004	1	0.73379	65.9552
GOTERM_BP_DIRECT	GO:0001658~branching involved in ureteric bud morphogenesis	3	1.66667	0.0660342	GPC3, NPNT, SOX9	169	42	16792	7.09721	1	0.734405	66.6458
GOTERM_BP_DIRECT	GO:0002548~monocyte chemotaxis	3	1.66667	0.0660342	LGALS3, CCL20, CCL19	169	42	16792	7.09721	1	0.734405	66.6458
GOTERM_BP_DIRECT	GO:1902476~chloride transmembrane transport	4	2.22222	0.0665317	GABRB3, SLC12A2, CLIC6, CFTR	169	93	16792	4.27359	1	0.731218	66.9302
GOTERM_BP_DIRECT	GO:0072112~glomerular visceral epithelial cell differentiation	2	1.11111	0.0679778	PROM1, CD24	169	7	16792	28.3888	1	0.733243	67.744
GOTERM_MF_DIRECT	GO:0008083~growth factor activity	5	2.77778	0.0683715	PDGFA, CTGF, EFEMP1, PDGFD, JAG1	161	162	16881	3.23614	1	0.682508	61.6143
GOTERM_BP_DIRECT	GO:0008202~steroid metabolic process	3	1.66667	0.0688137	CYP3A7, CYP2C19, AKR1B10	169	43	16792	6.93216	1	0.731975	68.2058
KEGG_PATHWAY	hsa05410:Hypertrophic cardiomyopathy (HCM)	4	2.22222	0.0688495	CACNA2D1, ITGB8, PRKAA2, TPM2	85	78	6910	4.16893	0.999974	0.652068	57.2531
GOTERM_BP_DIRECT	GO:0007165~signal transduction	18	10	0.0733447	S100A6, PLCXD3, CAP2, GABRB3, GULP1, LRRC1, COL15A1, GEM, CXCL6, SOX9, RASSF3, SMOC2, WISP1, CCL20, ANK3, ANTXR1, PRKAA2, DTNA	169	1161	16792	1.54048	1	0.749532	70.6032
GOTERM_CC_DIRECT	GO:0030054~cell junction	9	5	0.0736917	ENAH, GABRB3, MAP1B, GABBR1, SSPN, HOMER1, SNAP25, KCTD12, DTNA	175	459	18224	2.0419	1	0.411723	61.7197
GOTERM_CC_DIRECT	GO:0048471~perinuclear region of cytoplasm	11	6.11111	0.0746374	S100A6, PTGDS, RASEF, CTGF, STMN2, FAT1, CHI3L1, HEPH, LAMB1, SNAP25, SPP1	175	621	18224	1.84462	1	0.405311	62.2071
GOTERM_BP_DIRECT	GO:0007411~axon guidance	5	2.77778	0.0756304	FLRT2, ENAH, ROBO1, ANK3, SEMA3C	169	159	16792	3.12456	1	0.755117	71.7472
GOTERM_BP_DIRECT	GO:0007229~integrin-mediated signaling pathway	4	2.22222	0.0770812	ITGB8, CTGF, COL3A1, ITGBL1	169	99	16792	4.01458	1	0.756588	72.4515
GOTERM_BP_DIRECT	GO:0001504~neurotransmitter uptake	2	1.11111	0.0773064	SLC38A1, SNAP25	169	8	16792	24.8402	1	0.752371	72.5593
GOTERM_BP_DIRECT	GO:0010544~negative regulation of platelet activation	2	1.11111	0.0773064	PDGFA, PDGFRA	169	8	16792	24.8402	1	0.752371	72.5593
GOTERM_BP_DIRECT	GO:0071711~basement membrane organization	2	1.11111	0.0773064	FLRT2, COL4A1	169	8	16792	24.8402	1	0.752371	72.5593
GOTERM_MF_DIRECT	GO:0008009~chemokine activity	3	1.66667	0.0786335	CCL20, CCL19, CXCL6	161	49	16881	6.41944	1	0.717354	66.9528
GOTERM_CC_DIRECT	GO:0034707~chloride channel complex	3	1.66667	0.0796467	GABRB3, CLIC6, CFTR	175	49	18224	6.37574	1	0.41617	64.6948
GOTERM_BP_DIRECT	GO:0042593~glucose homeostasis	4	2.22222	0.0807518	FBN1, SOX4, PRKAA2, GPRC5B	169	101	16792	3.93509	1	0.762818	74.1607
GOTERM_MF_DIRECT	GO:0051371~muscle alpha-actinin binding	2	1.11111	0.0821582	SYNPO2, PALLD	161	9	16881	23.3002	1	0.717075	68.6217
GOTERM_CC_DIRECT	GO:1903561~extracellular vesicle	3	1.66667	0.0824623	SERPINE2, SLC12A2, COL6A3	175	50	18224	6.24823	1	0.417586	66.026
KEGG_PATHWAY	hsa04727:GABAergic synapse	4	2.22222	0.0842451	GABRB3, GLS, GABBR1, SLC38A1	85	85	6910	3.82561	0.999998	0.693975	64.9538
GOTERM_BP_DIRECT	GO:0043589~skin morphogenesis	2	1.11111	0.0865421	COL1A2, COL1A1	169	9	16792	22.0802	1	0.782197	76.656
GOTERM_BP_DIRECT	GO:0032836~glomerular basement membrane development	2	1.11111	0.0865421	COL4A4, COL4A3	169	9	16792	22.0802	1	0.782197	76.656
GOTERM_BP_DIRECT	GO:0072488~ammonium transmembrane transport	2	1.11111	0.0865421	SLC12A2, AQP1	169	9	16792	22.0802	1	0.782197	76.656
GOTERM_CC_DIRECT	GO:0043231~intracellular membrane-bounded organelle	10	5.55556	0.087344	PROM1, COL4A3, FXYD2, COL4A2, CYP2C19, CTGF, PODXL, VCAN, GPRC5B, PMEPA1	175	558	18224	1.86626	1	0.426895	68.2251
GOTERM_CC_DIRECT	GO:0016328~lateral plasma membrane	3	1.66667	0.0910873	EPCAM, TACSTD2, ANK3	175	53	18224	5.89456	1	0.431418	69.8218
GOTERM_CC_DIRECT	GO:0005923~bicellular tight junction	4	2.22222	0.0939223	EPCAM, ANK3, CLDN10, CLDN11	175	113	18224	3.68627	1	0.432446	70.9815
GOTERM_MF_DIRECT	GO:0005515~protein binding	93	51.6667	0.0949995	ENAH, S100A6, PDGFA, IGFBP7, ZMAT3, GABBR1, JAG1, AQP1, EPCAM, SH3YL1, GPC3, SERPINE2, GSN, ROBO1, CTGF, ANK3, MS4A1, LOXL4, ELOVL7, NALCN, FAM129A, FAM150B, GOLM1, SPON1, CRYAB, STMN2, MGP, DCDC2, CFTR, GEM, PALLD, MOXD1, THY1, DHRS2, CTSK, TAGLN, PTGDS, TACSTD2, AKR1B10, CYBRD1, PDGFRA, COL1A2, VCAN, SLC38A1, COL1A1, CLIP4, PMEPA1, LUM, COL3A1, BEX2, SOX4, IL32, DCN, SOX9, ITM2A, PAQR5, CCL20, …	161	8785	16881	1.10998	1	0.754917	74.064
GOTERM_BP_DIRECT	GO:0072015~glomerular visceral epithelial cell development	2	1.11111	0.0956859	PODXL, JAG1	169	10	16792	19.8722	1	0.811569	80.1413
GOTERM_BP_DIRECT	GO:0048048~embryonic eye morphogenesis	2	1.11111	0.0956859	EFEMP1, FBN1	169	10	16792	19.8722	1	0.811569	80.1413
GOTERM_CC_DIRECT	GO:0031594~neuromuscular junction	3	1.66667	0.0969778	SERPINE2, ANK3, PDZRN3	175	55	18224	5.68021	1	0.434218	72.1855
GOTERM_MF_DIRECT	GO:0043225~anion transmembrane-transporting ATPase activity	2	1.11111	0.0994843	ABCC4, CFTR	161	11	16881	19.0638	1	0.756985	75.7488
GOTERM_MF_DIRECT	GO:0043394~proteoglycan binding	2	1.11111	0.0994843	CTSK, COL5A1	161	11	16881	19.0638	1	0.756985	75.7488
